# Supplementary material for: Analysis of ambient temperature-responsive transcriptome in shoot apical meristem of heat-tolerant and heat-sensitive broccoli inbred lines during floral head formation
Source: BMC Plant Biol. 2019 Jan 3;19:3. doi: 10.1186/s12870-018-1613-x (PMC6318969; doi:10.1186/s12870-018-1613-x)
Supplement: Supplementary file 5 — Table S4. The HT and HS enriched gene sets. (XLSX 430 kb) [file 12870_2018_1613_MOESM5_ESM.xlsx]

## Sheet: FC2
HT enrichment
ProbeName	FC_HT15 vs HS15	FC_HT22 vs HS22	FC_HT27 vs HS27	Description	TAIR_Locus	TAIR_Description
A_46_P133969	2.55046	2.10276	2.17916	Rep: 40S ribosomal protein S27a-3 - Arabidopsis thaliana (Mouse-ear cress), complete [TC207267]
A_46_P152654	88.8001	49.4277	43.7258	Rep: Vegetative storage protein-like - Arabidopsis thaliana (Mouse-ear cress), partial (93%) [TC189547]	AT1G04040	HAD superfamily, subfamily IIIB acid phosphatase ; FUNCTIONS IN: acid phosphatase activity; INVOLVED IN: biological_process unknown; LOCATED IN: cell wall, plasma membrane, vacuole, plant-type cell wall; EXPRESSED IN: 19 plant structures; EXPRESSED DURING
A_46_P232754	28.8951	10.3013	13.9851
A_46_P267838	2.51583	2.99302	2.78975	BNZB_UP_187_B09_13MAR2006_077 Brassica napus BNZB Brassica napus cDNA 5', mRNA sequence [ES967465]
A_46_P040501	1.13338	2.03358	1.64573
A_46_P173549	2.03628	2.28277	2.40332	Rep: Chromosome chr13 scaffold_48, whole genome shotgun sequence - Vitis vinifera (Grape), partial (51%) [TC181875]	AT4G19985	Acyl-CoA N-acyltransferases (NAT) superfamily protein; FUNCTIONS IN: N-acetyltransferase activity; INVOLVED IN: N-terminal protein myristoylation, metabolic process; EXPRESSED IN: 23 plant structures; EXPRESSED DURING: 15 growth stages; CONTAINS InterPro
A_46_P268698	96.7357	90.3895	155.909
A_46_P171104	1.77835	1.88309	2.16452	Rep: Fmt protein - Brassica napus var. napus, complete [TC181426]	AT1G66520	pigment defective 194 (pde194); FUNCTIONS IN: hydroxymethyl-, formyl- and related transferase activity, formyltetrahydrofolate deformylase activity, catalytic activity; INVOLVED IN: purine ribonucleotide biosynthetic process, biosynthetic process; EXPRESS
A_46_P371805	2.54922	2.32422	1.46041		AT3G19000	2-oxoglutarate (2OG) and Fe(II)-dependent oxygenase superfamily protein; FUNCTIONS IN: oxidoreductase activity, acting on paired donors, with incorporation or reduction of molecular oxygen, 2-oxoglutarate as one donor, and incorporation of one atom each o
A_46_P017126	3.10022	1.1225	1.37768	EL1037 Brassica embryo library (EL) Brassica napus cDNA clone EL1037 complete, mRNA sequence [CN825862]	AT2G24580	FAD-dependent oxidoreductase family protein; FUNCTIONS IN: sarcosine oxidase activity; INVOLVED IN: tetrahydrofolate metabolic process, oxidation reduction; LOCATED IN: cellular_component unknown; EXPRESSED IN: 23 plant structures; EXPRESSED DURING: 13 gr
A_46_P159984	2.2979	2.04051	3.08042	Rep: CBL-interacting protein kinase - Brassica napus (Rape), partial (69%) [TC184242]	AT4G30960	Encodes CBL-interacting protein kinase 6 (CIPK6). Required for development and salt tolerance.
A_46_P256649	1.44815	1.86787	2.39107	Rep: Chromosome chr3 scaffold_8, whole genome shotgun sequence - Vitis vinifera (Grape), partial (23%) [TC185947]	AT4G34530	Encodes a transcription factor CIB1 (cryptochrome-interacting basic-helix-loop-helix). CIB1 interacts with CRY2 (cryptochrome 2) in a blue light-specific manner in yeast and Arabidopsis cells, and it acts together with additional CIB1-related proteins to
A_46_P096151	15.7755	12.8697	31.4728	Rep: F9C16.7 - Arabidopsis thaliana (Mouse-ear cress), partial (84%) [TC177679]	AT4G05380	P-loop containing nucleoside triphosphate hydrolases superfamily protein; FUNCTIONS IN: nucleoside-triphosphatase activity, ATPase activity, nucleotide binding, ATP binding; INVOLVED IN: biological_process unknown; LOCATED IN: cellular_component unknown;
A_46_P084456	297.554	235.374	298.04	0102222 Brassica napus Cold acclimation - light Brassica napus cDNA, mRNA sequence [EV201069]
A_46_P172624	10.9646	18.3885	23.6249	Rep: F-box/Kelch-repeat protein At4g39550 - Arabidopsis thaliana (Mouse-ear cress), partial (44%) [TC206801]
A_46_P310225	451.798	410.88	402.085	Rep: Thioredoxin-X, chloroplast precursor - Arabidopsis thaliana (Mouse-ear cress), partial (66%) [TC167011]	AT1G50320	encodes a prokaryotic thioredoxin
A_46_P099839	1.7138	1.98017	2.03164	BNARO1GH_T3_025_B01_23NOV2006_013 Brassica napus BNARO1GH Brassica napus cDNA 5', mRNA sequence [ES901666]
A_46_P155840	7.47748	4.33916	2.24675	Rep: Similarity to nuclear movement protein nudC - Arabidopsis thaliana (Mouse-ear cress), partial (83%) [TC183981]	AT4G27890	HSP20-like chaperones superfamily protein; CONTAINS InterPro DOMAIN/s: CS-like domain (InterPro:IPR007052), HSP20-like chaperone (InterPro:IPR008978), CS domain (InterPro:IPR017447); BEST Arabidopsis thaliana protein match is: HSP20-like chaperones superf
A_46_P028177	1.75002	1.71782	2.43998	BN25.067I09F020123 BN25 Brassica napus cDNA clone BN25067I09, mRNA sequence [CD827456]
A_46_P220979	1.62309	2.53285	2.51322
A_46_P365580	6.09798	7.05626	7.19998	Rep: Chromosome chr6 scaffold_15, whole genome shotgun sequence - Vitis vinifera (Grape), partial (22%) [TC206797]	AT5G12120	Ubiquitin-associated/translation elongation factor EF1B protein; INVOLVED IN: biological_process unknown; LOCATED IN: plasma membrane; EXPRESSED IN: 24 plant structures; EXPRESSED DURING: 15 growth stages; CONTAINS InterPro DOMAIN/s: Ubiquitin-associated/
A_46_P208544	1.72154	1.79098	2.2072		AT4G32710	Protein kinase superfamily protein; FUNCTIONS IN: protein serine/threonine kinase activity, protein kinase activity, kinase activity, ATP binding; INVOLVED IN: protein amino acid phosphorylation; EXPRESSED IN: 28 plant structures; EXPRESSED DURING: 13 gro
A_46_P059721	2.30444	2.3831	2.30079	6ETGS6H_UP_026_E11_04FEB2005_087 Brassica napus 6ETGS6h Brassica napus cDNA 5', mRNA sequence [EE441300]	AT4G01790	Ribosomal protein L7Ae/L30e/S12e/Gadd45 family protein; CONTAINS InterPro DOMAIN/s: Ribosomal protein L7Ae/L30e/S12e/Gadd45 (InterPro:IPR004038); Has 95 Blast hits to 95 proteins in 35 species: Archae - 3; Bacteria - 0; Metazoa - 62; Fungi - 0; Plants - 2
A_46_P281983	2.45615	1.63581	2.21059		AT3G52300	ATP synthase D chain, mitochondrial (ATPQ); FUNCTIONS IN: copper ion binding, zinc ion binding; INVOLVED IN: response to salt stress; LOCATED IN: in 7 components; EXPRESSED IN: 27 plant structures; EXPRESSED DURING: 16 growth stages; Has 290 Blast hits to
A_46_P060506	2.22735	1.93259	2.15252	24RDBNH_UP_055_E12_01NOV2005_088 Brassica napus 24RDBNH Brassica napus cDNA 5', mRNA sequence [EE508415]	AT1G07060	unknown protein; Has 30 Blast hits to 30 proteins in 10 species: Archae - 0; Bacteria - 0; Metazoa - 0; Fungi - 0; Plants - 30; Viruses - 0; Other Eukaryotes - 0 (source: NCBI BLink).
A_46_P165774	5.3587	2.67275	2.9435	Rep: WD-repeat protein-like protein - Arabidopsis thaliana (Mouse-ear cress), complete [TC188871]	AT4G33270	putative cdc20 protein (CDC20.1)
A_46_P064531	3.43593	2.29267	2.09421	BNBS8DCT_UP_021_C12_16APR2005_092 Brassica napus seeds BNBS8DCT Brassica napus cDNA 5', mRNA sequence [EE459890]
A_46_P295003	122.866	158.564	157.134
A_46_P248334	1.36483	3.83775	1.13403	Rep: Genomic DNA, chromosome 5, TAC clone:K18I23 - Arabidopsis thaliana (Mouse-ear cress), partial (25%) [TC190959]	AT3G56360	unknown protein; FUNCTIONS IN: molecular_function unknown; INVOLVED IN: biological_process unknown; LOCATED IN: chloroplast; EXPRESSED IN: 24 plant structures; EXPRESSED DURING: 15 growth stages; BEST Arabidopsis thaliana protein match is: unknown protein
A_46_P077141	2.45871	2.08446	3.19395	17ACDHMS_UP_018_E12_27OCT2004_088 Brassica napus 17ACDHMS Brassica napus cDNA 5', mRNA sequence [EE405195]	AT5G64350	FK506-binding protein 12 (FKBP12); FUNCTIONS IN: FK506 binding, peptidyl-prolyl cis-trans isomerase activity; INVOLVED IN: protein folding; LOCATED IN: chloroplast thylakoid lumen; EXPRESSED IN: 24 plant structures; EXPRESSED DURING: 14 growth stages; CON
A_46_P109404	2.05531	1.3521	1.42019	0152453 Brassica napus Etiolated seedlings (pSPORT1) Brassica napus cDNA, mRNA sequence [EV180710]	AT3G16740	F-box and associated interaction domains-containing protein; CONTAINS InterPro DOMAIN/s: F-box domain, cyclin-like (InterPro:IPR001810), F-box domain, Skp2-like (InterPro:IPR022364), F-box associated domain, type 1 (InterPro:IPR006527), F-box associated i
A_46_P362850	1.88378	2.42711	2.66102	Rep: Predicted protein - Nematostella vectensis (Starlet sea anemone), partial (32%) [TC204943]	AT5G40340	Tudor/PWWP/MBT superfamily protein; FUNCTIONS IN: molecular_function unknown; LOCATED IN: nucleolus; EXPRESSED IN: 24 plant structures; EXPRESSED DURING: 14 growth stages; CONTAINS InterPro DOMAIN/s: PWWP (InterPro:IPR000313); BEST Arabidopsis thaliana pr
A_46_P183849	3.53739	-1.38088	-2.23541	Rep: Beta-1,3-glucanase - Brassica rapa subsp. chinensis (Pak-choi), partial (96%) [TC192039]	AT3G57260	beta 1,3-glucanase
A_46_P144829	2.0447	2.1723	2.24099	Rep: UPF0480 protein At4g32130 precursor - Arabidopsis thaliana (Mouse-ear cress), partial (98%) [TC170278]	AT4G32130	FUNCTIONS IN: carbohydrate binding; INVOLVED IN: biological_process unknown; LOCATED IN: endoplasmic reticulum; EXPRESSED IN: male gametophyte, callus, pollen tube; EXPRESSED DURING: L mature pollen stage, M germinated pollen stage; CONTAINS InterPro DOMA
A_46_P070916	5.79143	2.80734	3.59211	BNAEN3GH_UP_134_A12_1ONOV2006_096 Brassica napus BNAEN3GH Brassica napus cDNA 5', mRNA sequence [EV003610]	AT5G18920	Cox19-like CHCH family protein; CONTAINS InterPro DOMAIN/s: CHCH (InterPro:IPR010625); Has 1807 Blast hits to 1807 proteins in 277 species: Archae - 0; Bacteria - 0; Metazoa - 736; Fungi - 347; Plants - 385; Viruses - 0; Other Eukaryotes - 339 (source: NC
A_46_P245289	2.16769	2.02633	1.98161		AT4G32470	Cytochrome bd ubiquinol oxidase, 14kDa subunit; FUNCTIONS IN: ubiquinol-cytochrome-c reductase activity; INVOLVED IN: mitochondrial electron transport, ubiquinol to cytochrome c; LOCATED IN: mitochondrion, plasma membrane, plastid, mitochondrial respirato
A_46_P333205	36.9612	32.8674	35.5771	Rep: kinase - Arabidopsis thaliana, partial (26%) [TC208848]	AT2G37050	Leucine-rich repeat protein kinase family protein; FUNCTIONS IN: kinase activity; INVOLVED IN: protein amino acid phosphorylation; LOCATED IN: plasma membrane; EXPRESSED IN: 24 plant structures; EXPRESSED DURING: 13 growth stages; CONTAINS InterPro DOMAIN
A_46_P235569	1.16725	2.02282	1.93752	Rep: Zinc finger protein CONSTANS-LIKE 9 - Arabidopsis thaliana (Mouse-ear cress), partial (34%) [TC198634]	AT3G07650	CONSTANS-like 9 (COL9)
A_46_P333660	2.16879	1.9638	1.9224	Rep: Expressed protein - Arabidopsis thaliana (Mouse-ear cress), partial (42%) [TC188452]	AT2G42580	9
A_46_P252449	2.64147	2.42081	1.41979	0143940 Brassica napus Etiolated seedlings (Uni-ZAP) Brassica napus cDNA, mRNA sequence [EV167130]
A_46_P242259	2.82629	2.72544	3.11426
A_46_P017246	15.5651	17.3503	11.6922	BNDH2DCT_UP_015_H01_14JUN2004_001 Brassica napus seeds BNDH2DCT Brassica napus cDNA 5', mRNA sequence [EE460981]	AT5G57785	unknown protein; Has 30201 Blast hits to 17322 proteins in 780 species: Archae - 12; Bacteria - 1396; Metazoa - 17338; Fungi - 3422; Plants - 5037; Viruses - 0; Other Eukaryotes - 2996 (source: NCBI BLink).
A_46_P071896	2.66356	1.72106	2.41499	BNSCS1CT_UP_067_G10_26MAR2007_068 Brassica napus BNSCS1CT Brassica napus cDNA 5', mRNA sequence [EV015006]	AT4G15520	tRNA/rRNA methyltransferase (SpoU) family protein; FUNCTIONS IN: RNA binding, RNA methyltransferase activity; INVOLVED IN: RNA processing; LOCATED IN: cellular_component unknown; EXPRESSED IN: 23 plant structures; EXPRESSED DURING: 13 growth stages; CONTA
A_46_P093816	2.50423	1.68595	1.90231	BNSCS1CT_UP_045_E05_25MAR2007_039 Brassica napus BNSCS1CT Brassica napus cDNA 5', mRNA sequence [EV013885]	AT3G12587	Oligosaccaryltransferase; FUNCTIONS IN: molecular_function unknown; INVOLVED IN: biological_process unknown; LOCATED IN: endomembrane system; CONTAINS InterPro DOMAIN/s: Oligosaccaryltransferase (InterPro:IPR018943); BEST Arabidopsis thaliana protein matc
A_46_P337890	117.394	148.122	125.938	Rep: AT4g12080/F16J13_150 - Arabidopsis thaliana (Mouse-ear cress), partial (15%) [TC191396]	AT4G22770	AT hook motif DNA-binding family protein; FUNCTIONS IN: DNA binding; EXPRESSED IN: 14 plant structures; EXPRESSED DURING: 4 anthesis, F mature embryo stage, petal differentiation and expansion stage, E expanded cotyledon stage, D bilateral stage; CONTAINS
A_46_P344060	1.78319	2.11432	1.79065	Rep: Expressed protein - Arabidopsis thaliana (Mouse-ear cress), partial (66%) [TC166941]	AT1G58270	ZW9 mRNA, complete cds
A_46_P214189	2.03945	1.93279	2.07167	Rep: At1g76760 - Arabidopsis thaliana (Mouse-ear cress), complete [TC168673]	AT1G76760	Encodes a y-type thioredoxin (Trx-y1) localized in chloroplast stroma.
A_46_P261803	1.89144	2.22201	2.00283	Rep: Glutaredoxin-C1 - Arabidopsis thaliana (Mouse-ear cress), partial (98%) [TC177390]	AT5G63030	Thioredoxin superfamily protein; FUNCTIONS IN: electron carrier activity, arsenate reductase (glutaredoxin) activity, protein disulfide oxidoreductase activity; INVOLVED IN: N-terminal protein myristoylation, cell redox homeostasis; LOCATED IN: cellular_c
A_46_P196574	4.41642	4.62781	4.99063	0158497 Brassica napus Etiolated seedlings (Uni-ZAP) Brassica napus cDNA, mRNA sequence [EV174313]	AT4G28370	RING/U-box superfamily protein; FUNCTIONS IN: zinc ion binding; INVOLVED IN: biological_process unknown; LOCATED IN: endomembrane system; EXPRESSED IN: 22 plant structures; EXPRESSED DURING: 13 growth stages; CONTAINS InterPro DOMAIN/s: Zinc finger, RING-
A_46_P274378	2.58099	2.51476	3.69028	Rep: CBL-interacting protein kinase - Brassica napus (Rape), partial (95%) [TC207903]	AT4G30960	Encodes CBL-interacting protein kinase 6 (CIPK6). Required for development and salt tolerance.
A_46_P329500	3.85204	3.96578	4.18867	Rep: Predicted protein - Physcomitrella patens subsp. patens, complete [TC187325]	AT1G10865	FUNCTIONS IN: molecular_function unknown; INVOLVED IN: biological_process unknown; LOCATED IN: cellular_component unknown; CONTAINS InterPro DOMAIN/s: Cytochrome c oxidase assembly protein PET191, N-terminal (InterPro:IPR018793); Has 241 Blast hits to 241
A_46_P136039	4.77508	4.3585	4.09306	Rep: Adenosine nucleotide translocator - Brassica oleracea var. acephala (Flowering kale), partial (47%) [TC167954]
A_46_P362490	3.01469	3.04627	4.73994	Rep: Laccase-17 precursor - Arabidopsis thaliana (Mouse-ear cress), partial (49%) [TC204789]	AT5G60020	LAC17 appears to have laccase activity based on enzyme assays performed using lac17 mutants. Notably, these mutants appear to have a reduced deposition of G lignin units. LAC17 is expressed in interfascicular fibers and likely contributes to lignin biosyn
A_46_P116289	2.39946	2.89854	2.52505	0156752 Brassica napus Etiolated seedlings (pSPORT1) Brassica napus cDNA, mRNA sequence [EV183060]	AT3G03050	encodes a cellulose synthase like protein. mutations initiate root hairs that rupture at their tip soon after initiation. is required for the synthesis of a noncellulosic wall polysaccharide.
A_46_P141654	2.57665	1.78574	1.75577	0148791 Brassica napus Etiolated seedlings (Uni-ZAP) Brassica napus cDNA, mRNA sequence [EV169901]	AT4G32940	Encodes a vacuolar processing enzyme belonging to a novel group of cysteine proteinases that is expressed in vegetative organs and is upregulated in association with various types of cell death and under stressed conditions. They are essential in processi
A_46_P130169	1.08889	2.0818	7.31125	BNSCS2CT_UP_318_H12_28MAY2007_082 Brassica napus BNSCS2CT Brassica napus cDNA 5', mRNA sequence [EV038870]	AT3G19550	unknown protein; FUNCTIONS IN: molecular_function unknown; INVOLVED IN: biological_process unknown; LOCATED IN: mitochondrion; EXPRESSED IN: 15 plant structures; EXPRESSED DURING: 9 growth stages; Has 36 Blast hits to 36 proteins in 8 species: Archae - 0;
A_46_P185695	1.06699	1.77176	2.10792	Rep: Genomic DNA, chromosome 5, BAC clone:F10E10 - Arabidopsis thaliana (Mouse-ear cress), partial (32%) [TC210285]	AT5G46600	Aluminium activated malate transporter family protein; FUNCTIONS IN: molecular_function unknown; INVOLVED IN: response to aluminum ion; LOCATED IN: cellular_component unknown; CONTAINS InterPro DOMAIN/s: Malate transporter, aliminium toerance (InterPro:IP
A_46_P312220	6.02455	5.20318	3.72836	Rep: 26S proteasome subunit-like protein - Arabidopsis thaliana (Mouse-ear cress), complete [TC168194]	AT4G19006	Proteasome component (PCI) domain protein; CONTAINS InterPro DOMAIN/s: Proteasome component (PCI) domain (InterPro:IPR000717); BEST Arabidopsis thaliana protein match is: Proteasome component (PCI) domain protein (TAIR:AT5G45620.1); Has 1087 Blast hits to
A_46_P135769	1.65912	1.76155	2.91771	Rep: Vacuolar ATP synthase 16 kDa proteolipid subunit 1/3/5 - Arabidopsis thaliana (Mouse-ear cress), complete [TC167187]	AT4G34720	vacuolar H+-pumping ATPase 16 kDa proteolipid (ava-p1)
A_46_P107609	2.91009	6.28132	3.80704		AT5G27150	Encodes a vacuolar sodium/proton antiporter involved in salt tolerance, ion homeostasis, and leaf development.
A_46_P278868	27.0597	25.0551	28.0422		AT2G40650	PRP38 family protein; CONTAINS InterPro DOMAIN/s: PRP38 (InterPro:IPR005037); BEST Arabidopsis thaliana protein match is: SART-1 family (TAIR:AT5G16780.1); Has 71927 Blast hits to 24591 proteins in 1125 species: Archae - 74; Bacteria - 21911; Metazoa - 26
A_46_P216204	4.08096	-3.30768	-5.80747	Rep: F24O1.6 - Arabidopsis thaliana (Mouse-ear cress), partial (33%) [TC189882]	AT5G42530	unknown protein; FUNCTIONS IN: molecular_function unknown; INVOLVED IN: biological_process unknown; LOCATED IN: endomembrane system; BEST Arabidopsis thaliana protein match is: unknown protein (TAIR:AT2G25510.2); Has 30201 Blast hits to 17322 proteins in
A_46_P235149	3.21721	4.43052	3.3243		AT3G16030	CALLUS EXPRESSION OF RBCS 101 (CES101); FUNCTIONS IN: in 6 functions; INVOLVED IN: protein amino acid phosphorylation; LOCATED IN: endomembrane system; EXPRESSED IN: 21 plant structures; EXPRESSED DURING: 13 growth stages; CONTAINS InterPro DOMAIN/s: Curc
A_46_P313565	2.11948	2.05577	2.13955	Rep: F11O4.14 - Arabidopsis thaliana (Mouse-ear cress), partial (61%) [TC170917]
A_46_P136669	14.5219	15.3117	16.4837	Rep: 5-methyltetrahydropteroyltriglutamate--homocysteine methyltransferase - Arabidopsis thaliana (Mouse-ear cress), partial (63%) [TC183491]
A_46_P011701	1.9212	2.44082	1.5239	0100035 Brassica napus Cold acclimation - light Brassica napus cDNA, mRNA sequence [EV198882]	AT1G12640	MBOAT (membrane bound O-acyl transferase) family protein; FUNCTIONS IN: acyltransferase activity; INVOLVED IN: biological_process unknown; LOCATED IN: plasma membrane, membrane; EXPRESSED IN: 25 plant structures; EXPRESSED DURING: 15 growth stages; CONTAI
A_46_P166054	3.72436	4.29942	5.1593	Rep: At1g03330 - Arabidopsis thaliana (Mouse-ear cress), complete [TC187352]	AT1G03330	Small nuclear ribonucleoprotein family protein; CONTAINS InterPro DOMAIN/s: Like-Sm ribonucleoprotein (LSM) domain (InterPro:IPR001163), U6 snRNA-associated Sm-like protein LSm2 (InterPro:IPR016654), Like-Sm ribonucleoprotein (LSM) domain, eukaryotic/arch
A_46_P139114	2.91251	2.07836	2.11738		AT3G56340	Ribosomal protein S26e family protein; FUNCTIONS IN: structural constituent of ribosome; INVOLVED IN: translation, ribosome biogenesis; LOCATED IN: cytosolic small ribosomal subunit, cytosolic ribosome, ribosome, membrane; EXPRESSED IN: 23 plant structure
A_46_P024351	2.65455	-1.64793	-1.35719	Brassica napus cultivar Westar WRKY transcription factor 53 (WRKY53) mRNA, WRKY53-2 allele, complete cds [FJ384111]	AT4G23810	member of WRKY Transcription Factor; Group III
A_46_P167614	2.70344	2.87347	3.12759	Rep: Proteasome subunit alpha type-4 - Arabidopsis thaliana (Mouse-ear cress), partial (92%) [TC181061]	AT3G22110	Encodes the alpha-3 subunit of 20s proteasome.
A_46_P306450	3.40642	6.49949	6.45111
A_46_P025581	1.06716	1.97884	2.2179	BNSCS2CT_UP_010_D02_05JAN2005_010 Brassica napus seed coat BNSCS2CT Brassica napus cDNA 5', mRNA sequence [EE463437]	AT5G62360	Plant invertase/pectin methylesterase inhibitor superfamily protein; FUNCTIONS IN: enzyme inhibitor activity, pectinesterase inhibitor activity, pectinesterase activity; INVOLVED IN: biological_process unknown; LOCATED IN: cellular_component unknown; EXPR
A_46_P280908	2.48356	2.75633	2.63547	BNZB_UP_187_B09_13MAR2006_077 Brassica napus BNZB Brassica napus cDNA 5', mRNA sequence [ES967465]	AT3G15980	Coatomer, beta' subunit; FUNCTIONS IN: structural molecule activity; INVOLVED IN: intracellular protein transport, vesicle-mediated transport; LOCATED IN: membrane coat, COPI vesicle coat; EXPRESSED IN: 24 plant structures; EXPRESSED DURING: 13 growth sta
A_46_P373805	1.93827	2.31844	2.07558	Rep: F3H9.9 protein - Arabidopsis thaliana (Mouse-ear cress), partial (16%) [TC209616]
A_46_P338975	1.47854	1.96937	2.69375	Rep: Uncharacterized protein At4g29440.2 - Arabidopsis thaliana (Mouse-ear cress), partial (9%) [TC192128]
A_46_P088431	1.89027	2.09222	1.91158	FNYFDC_UP_005_D10_01MAR2004_074 Brassica seed development normalized FNYFDC Brassica napus cDNA 5', mRNA sequence [EE505648]	AT1G01690	Encodes a novel plant-specific protein that is involved in meiotic double strand break formation.
A_46_P164484	1.72002	2.23478	1.85974	Rep: Nuclear RNA binding protein A-like protein - Arabidopsis thaliana (Mouse-ear cress), partial (80%) [TC168932]
A_46_P194399	3.06216	3.49229	2.94082
A_46_P187204	4.98441	8.18491	5.04403	Rep: Plastidic glucose transporter 4 - Arabidopsis thaliana (Mouse-ear cress), partial (90%) [TC169266]
A_46_P070986	3.7816	4.19851	4.18837	BNARO1GH_T3_020_D11_23NOV2006_089 Brassica napus BNARO1GH Brassica napus cDNA 5', mRNA sequence [ES901243]	AT2G01340	Encodes a protein whose expression is responsive to nematode infection.
A_46_P034576	334.119	364.378	392.494		AT5G12190	RNA-binding (RRM/RBD/RNP motifs) family protein; FUNCTIONS IN: RNA binding, nucleotide binding, nucleic acid binding; INVOLVED IN: biological_process unknown; EXPRESSED IN: 24 plant structures; EXPRESSED DURING: 13 growth stages; CONTAINS InterPro DOMAIN/
A_46_P371445	2.85583	2.90168	2.56232	Rep: Cyclin-T1-3 - Arabidopsis thaliana (Mouse-ear cress), partial (96%) [TC208692]	AT1G27630	cyclin T 1;3 (CYCT1;3); CONTAINS InterPro DOMAIN/s: Cyclin-like (InterPro:IPR011028), Transcription regulator cyclin (InterPro:IPR015429), Cyclin-related (InterPro:IPR013763), Cyclin, N-terminal (InterPro:IPR006671), Cyclin (InterPro:IPR006670); BEST Arab
A_46_P157349	2.41728	2.15578	2.39617	Rep: Mitochondrial basic amino acid carrier - Arabidopsis thaliana (Mouse-ear cress), partial (52%) [TC194041]	AT2G33820	encodes a mitochondrial ornithine transporter which exports ornithine from the mitochondrion to the cytosol
A_46_P364680	3.54957	1.57992	2.30427
A_46_P245619	2.73108	3.28527	2.453
A_46_P245639	4.24418	7.36477	11.6944
A_46_P149144	1.781	2.6231	1.49481	0100035 Brassica napus Cold acclimation - light Brassica napus cDNA, mRNA sequence [EV198882]	AT1G12640	MBOAT (membrane bound O-acyl transferase) family protein; FUNCTIONS IN: acyltransferase activity; INVOLVED IN: biological_process unknown; LOCATED IN: plasma membrane, membrane; EXPRESSED IN: 25 plant structures; EXPRESSED DURING: 15 growth stages; CONTAI
A_46_P018458	5.57164	-10.101	-36.7604	0085975 Brassica napus Bud library Brassica napus cDNA, mRNA sequence [EV162113]	AT1G75050	Pathogenesis-related thaumatin superfamily protein; FUNCTIONS IN: molecular_function unknown; INVOLVED IN: response to other organism; LOCATED IN: endomembrane system; EXPRESSED IN: 6 plant structures; EXPRESSED DURING: 4 anthesis, petal differentiation a
A_46_P299090	362.188	378.221	373.539	Rep: T32E20.5 - Arabidopsis thaliana (Mouse-ear cress), partial (50%) [TC191842]
A_46_P070631	2.59022	2.45814	2.7251	BNAOV1GH_T3_012_C10_12JULY2007_076 BNAOV1GH Brassica napus cDNA 5', mRNA sequence [GR440704]	AT3G12210	DNA binding; FUNCTIONS IN: DNA binding; INVOLVED IN: DNA repair; EXPRESSED IN: 22 plant structures; EXPRESSED DURING: 13 growth stages; CONTAINS InterPro DOMAIN/s: Helix-hairpin-helix DNA-binding motif, class 1 (InterPro:IPR003583); Has 226 Blast hits to
A_46_P100594	2.20706	1.66461	1.39946	BNAR05GH_T3_001_F09_17NOV2006_069 Brassica napus BNARO5GH Brassica napus cDNA 5', mRNA sequence [ES903665]	AT3G20390	endoribonuclease L-PSP family protein; FUNCTIONS IN: endoribonuclease activity; INVOLVED IN: response to cadmium ion; LOCATED IN: thylakoid, mitochondrion, chloroplast, plastid, vacuole; EXPRESSED IN: 27 plant structures; EXPRESSED DURING: 16 growth stage
A_46_P021916	9.15157	46.4955	18.9988	Rep: Pyruvate kinase - Arabidopsis thaliana (Mouse-ear cress), partial (4%) [TC167172]
A_46_P210594	2.32607	4.56229	2.37935	Rep: Light regulated protein-like protein - Brassica campestris (Field mustard), partial (98%) [TC209408]	AT3G26740	transcripts are differentially regulated at the level of mRNA stability at different times of day controlled by the circadian clock. mRNAs are targets of the mRNA degradation pathway mediated by the downstream (DST) instability determinant.
A_46_P109524	3.86071	2.11874	2.56415	0149829 Brassica napus Etiolated seedlings (Uni-ZAP) Brassica napus cDNA, mRNA sequence [EV170323]	AT5G64370	PYD3 encodes a beta-ureidopropionase which, when expressed in E. coli, has been shown to convert beta-ureidopropionate into beta-alanine. It localizes to the cytosol and plays an important role in uracil degradation.
A_46_P192044	1.77561	3.37225	1.9071		AT2G36290	alpha/beta-Hydrolases superfamily protein; FUNCTIONS IN: hydrolase activity; INVOLVED IN: biological_process unknown; LOCATED IN: endoplasmic reticulum; EXPRESSED IN: 24 plant structures; EXPRESSED DURING: 13 growth stages; CONTAINS InterPro DOMAIN/s: Alp
A_46_P033786	45.726	50.7152	47.8913	0168508 Brassica napus Late bud Brassica napus cDNA, mRNA sequence [EV165521]
A_46_P370440	1.922	1.83618	2.6896	Rep: Chromosome chr19 scaffold_111, whole genome shotgun sequence - Vitis vinifera (Grape), partial (15%) [TC208265]	AT1G10180	BEST Arabidopsis thaliana protein match is: exocyst complex component 84B (TAIR:AT5G49830.1); Has 132 Blast hits to 132 proteins in 25 species: Archae - 0; Bacteria - 0; Metazoa - 7; Fungi - 0; Plants - 117; Viruses - 0; Other Eukaryotes - 8 (source: NCBI
A_46_P225324	1.4224	1.5974	2.0016		AT1G64200	vacuolar H+-ATPase subunit E isoform 3 (VHA-E3); FUNCTIONS IN: proton-transporting ATPase activity, rotational mechanism; INVOLVED IN: ATP synthesis coupled proton transport; LOCATED IN: plasma membrane, vacuole, mitochondrial proton-transporting ATP synt
A_46_P251979	1120.96	1901.14	1569.81	Rep: Predicted protein - Physcomitrella patens subsp. patens, partial (10%) [TC191645]
A_46_P273463	2.34395	2.01372	1.54709	Rep: At1g12310/F5O11_2 - Arabidopsis thaliana (Mouse-ear cress), complete [TC168372]	AT1G12310	Calcium-binding EF-hand family protein; FUNCTIONS IN: calcium ion binding; INVOLVED IN: biological_process unknown; LOCATED IN: plasma membrane, nucleus, cytoplasm; EXPRESSED IN: 26 plant structures; EXPRESSED DURING: 15 growth stages; CONTAINS InterPro D
A_46_P245579	-1.03528	1.5731	4.54991	BNSCS3CT_UP_032_H12_12JAN2005_082 Brassica napus seed coat BNSCS3CT Brassica napus cDNA 5', mRNA sequence [EE467446]
A_46_P163724	4.38813	5.59724	6.32058	Rep: Invertase-like protein - Arabidopsis thaliana (Mouse-ear cress), partial (29%) [TC176637]
A_46_P138124	1.87576	2.16471	3.01971	Rep: Mannan endo-1,4-beta-mannosidase 7 precursor - Arabidopsis thaliana (Mouse-ear cress), complete [TC206873]
A_46_P149209	3.99452	6.64178	5.88537	Rep: Chromosome chr14 scaffold_27, whole genome shotgun sequence - Vitis vinifera (Grape), complete [TC162700]
A_46_P071616	3.67628	3.31928	2.74083	BNYS2DCT_UP_033_E09_03MAR2005_071 Brassica napus seeds BNYS2DCT Brassica napus cDNA 5', mRNA sequence [EE475985]
A_46_P287813	1.85076	1.76105	2.04106		AT4G32470	Cytochrome bd ubiquinol oxidase, 14kDa subunit; FUNCTIONS IN: ubiquinol-cytochrome-c reductase activity; INVOLVED IN: mitochondrial electron transport, ubiquinol to cytochrome c; LOCATED IN: mitochondrion, plasma membrane, plastid, mitochondrial respirato
A_46_P374845	1.65969	2.33242	2.41034	Rep: Chromosome chr5 scaffold_2, whole genome shotgun sequence - Vitis vinifera (Grape), partial (40%) [TC210021]	AT4G28570	Long-chain fatty alcohol dehydrogenase family protein; FUNCTIONS IN: electron carrier activity, oxidoreductase activity, acting on CH-OH group of donors, FAD binding; LOCATED IN: endoplasmic reticulum; EXPRESSED IN: 25 plant structures; EXPRESSED DURING:
A_46_P076416	7.23642	3.37262	4.04446	15ACDHYS_UP_024_E08_15OCT2004_056 Brassica napus 15ACDHYS Brassica napus cDNA 5', mRNA sequence [EE401951]	AT5G23010	Encodes a methylthioalkylmalate synthase, catalyzes the condensation reactions of the first two rounds of methionine chain elongation in the biosynthesis of methionine-derived glucosinolates.
A_46_P222029	52.4631	213.41	135.844	Rep: ER lumen protein retaining receptor - Arabidopsis thaliana (Mouse-ear cress), complete [TC189753]	AT3G25160	ER lumen protein retaining receptor family protein; FUNCTIONS IN: ER retention sequence binding, receptor activity; INVOLVED IN: protein retention in ER lumen, protein transport; LOCATED IN: integral to membrane; EXPRESSED IN: 21 plant structures; EXPRESS
A_46_P259534	13.5505	13.8678	26.6438	Rep: Xylosidase - Arabidopsis thaliana (Mouse-ear cress), partial (28%) [TC184926]	AT5G49360	Encodes a bifunctional {beta}-D-xylosidase/{alpha}-L-arabinofuranosidase required for pectic arabinan modification. Located in the extracellular matrix. Gene is expressed specifically in tissues undergoing secondary wall thickening. This is a member of g
A_46_P001726	1.69996	2.0283	1.59554	26RDBNT_UP_027_F12_23JAN2004_086 Brassica napus 26RDBNT Brassica napus cDNA 5', mRNA sequence [CN737507]
A_46_P025241	2.49111	2.72209	2.03998	BNARO2GH_T3_028_A10_15DEC2006_080 Brassica napus BNARO2GH Brassica napus cDNA 5', mRNA sequence [ES913724]	AT5G07460	ubiquitous enzyme that repairs oxidatively damaged proteins. Methionine sulfoxide reductase activity. Mutant lacking reductase activity showed increased protein oxidation, nitration and glycation of specific amino acid residues during darkness.
A_46_P289968	2.15437	1.89848	1.94656	0194356 Brassica napus Apical meristem Brassica napus cDNA, mRNA sequence [EV096233]
A_46_P345425	2.38757	2.28116	1.75118		AT5G66820	unknown protein; Has 35333 Blast hits to 34131 proteins in 2444 species: Archae - 798; Bacteria - 22429; Metazoa - 974; Fungi - 991; Plants - 531; Viruses - 0; Other Eukaryotes - 9610 (source: NCBI BLink).
A_46_P363565	1.49254	2.06652	1.68508	Rep: 4-coumarate--CoA ligase-like 4 - Arabidopsis thaliana (Mouse-ear cress), partial (25%) [TC205279]	AT1G20500	AMP-dependent synthetase and ligase family protein; FUNCTIONS IN: 4-coumarate-CoA ligase activity; INVOLVED IN: phenylpropanoid metabolic process, metabolic process; CONTAINS InterPro DOMAIN/s: AMP-binding, conserved site (InterPro:IPR020845), AMP-depende
A_46_P210714	1.64426	2.1112	1.91066	Rep: Polyphosphoinositide binding protein Ssh1p - Glycine max (Soybean), partial (30%) [TC190430]
A_46_P357850	1.76413	2.14923	3.16793	Rep: 60S ribosomal protein L39-1 - Arabidopsis thaliana (Mouse-ear cress), complete [TC202610]	AT4G31985	Ribosomal protein L39 family protein; FUNCTIONS IN: structural constituent of ribosome; INVOLVED IN: translation; LOCATED IN: ribosome, cytosolic large ribosomal subunit; EXPRESSED IN: 23 plant structures; EXPRESSED DURING: 13 growth stages; CONTAINS Inte
A_46_P074641	4.21006	3.93867	3.65549	Rep: Expressed protein - Arabidopsis thaliana (Mouse-ear cress), partial (73%) [TC176272]	AT1G74300	alpha/beta-Hydrolases superfamily protein; FUNCTIONS IN: catalytic activity; INVOLVED IN: biological_process unknown; LOCATED IN: endomembrane system; EXPRESSED IN: 11 plant structures; EXPRESSED DURING: 6 growth stages; CONTAINS InterPro DOMAIN/s: Alpha/
A_46_P235329	2.138	2.04244	1.98471	Rep: Lipoxygenase - Brassica oleracea var. gemmifera (Brussel sprouts), partial (26%) [TC191688]	AT3G45140	Chloroplast lipoxygenase required for wound-induced jasmonic acid accumulation in Arabidopsis.Mutants are resistant to Staphylococcus aureus and accumulate salicylic acid upon infection.
A_46_P339200	6.29832	5.25466	4.46249	Rep: ACI14 - Solanum lycopersicum (Tomato) (Lycopersicon esculentum), partial (55%) [TC192267]	AT3G09970	Calcineurin-like metallo-phosphoesterase superfamily protein; FUNCTIONS IN: hydrolase activity, protein serine/threonine phosphatase activity; INVOLVED IN: biological_process unknown; LOCATED IN: cellular_component unknown; EXPRESSED IN: 23 plant structur
A_46_P240239	1.96532	1.87561	2.42147		AT1G11600	member of CYP77B
A_46_P013256	2.25347	1.89272	2.43396	63JKCOT5_T3_015_F06_22JAN2005_038 63JKCOT5 Brassica napus cDNA 5', mRNA sequence [DY021167]	AT5G27760	Hypoxia-responsive family protein; CONTAINS InterPro DOMAIN/s: Hypoxia induced protein, conserved region (InterPro:IPR007667); BEST Arabidopsis thaliana protein match is: Hypoxia-responsive family protein (TAIR:AT3G05550.1); Has 1807 Blast hits to 1807 pr
A_46_P134154	352.866	234.534	839.588		AT4G00040	Chalcone and stilbene synthase family protein; FUNCTIONS IN: transferase activity, transferring acyl groups other than amino-acyl groups, catalytic activity, acyltransferase activity; INVOLVED IN: phenylpropanoid biosynthetic process, biosynthetic process
A_46_P285008	1.74025	2.28806	1.86057
A_46_P149259	5.95576	4.0801	3.41286	Rep: Probable NADH dehydrogenase [ubiquinone] 1 alpha subcomplex subunit 5, mitochondrial precursor - Arabidopsis thaliana (Mouse-ear cress), complete [TC170008]	AT5G52840	NADH-ubiquinone oxidoreductase-related; FUNCTIONS IN: oxidoreductase activity, acting on NADH or NADPH; INVOLVED IN: photorespiration; LOCATED IN: mitochondrion, mitochondrial membrane, chloroplast, respiratory chain complex I, membrane; EXPRESSED IN: 22
A_46_P285563	1305.08	3180.68	2747.89	Rep: Histone H3.2 - Arabidopsis thaliana (Mouse-ear cress), complete [TC171219]	AT5G65360	Histone superfamily protein; FUNCTIONS IN: DNA binding; INVOLVED IN: nucleosome assembly; LOCATED IN: chloroplast, nucleosome; EXPRESSED IN: 23 plant structures; EXPRESSED DURING: 14 growth stages; CONTAINS InterPro DOMAIN/s: Histone H3 (InterPro:IPR00016
A_46_P250019	1.58868	2.34425	1.55585	0200532 Brassica napus Undamaged cotyledons Brassica napus cDNA, mRNA sequence [EV186325]	AT5G48470	unknown protein; FUNCTIONS IN: molecular_function unknown; INVOLVED IN: biological_process unknown; LOCATED IN: chloroplast; EXPRESSED IN: 22 plant structures; EXPRESSED DURING: 13 growth stages; Has 30201 Blast hits to 17322 proteins in 780 species: Arch
A_46_P233714	4.58289	5.04802	5.56844		AT3G62740	beta glucosidase 7 (BGLU7); FUNCTIONS IN: cation binding, hydrolase activity, hydrolyzing O-glycosyl compounds, catalytic activity; INVOLVED IN: carbohydrate metabolic process; LOCATED IN: endomembrane system; EXPRESSED IN: 7 plant structures; EXPRESSED D
A_46_P156374	2.0252	1.92658	2.06348	Rep: At4g34412 - Arabidopsis thaliana (Mouse-ear cress), complete [TC165074]	AT4G34412	CONTAINS InterPro DOMAIN/s: Kinase binding protein CGI-121 (InterPro:IPR013926); Has 275 Blast hits to 275 proteins in 139 species: Archae - 0; Bacteria - 5; Metazoa - 98; Fungi - 109; Plants - 42; Viruses - 0; Other Eukaryotes - 21 (source: NCBI BLink).
A_46_P121689	6.28466	4.44771	3.06125	0165248 Brassica napus Late bud Brassica napus cDNA, mRNA sequence [EV163784]	AT3G28715	ATPase, V0/A0 complex, subunit C/D; FUNCTIONS IN: hydrogen ion transmembrane transporter activity, proton-transporting ATPase activity, rotational mechanism; INVOLVED IN: proton transport, ATP synthesis coupled proton transport; EXPRESSED IN: male gametop
A_46_P315550	4.78952	1.67611	2.14245	Rep: At1g78660 - Arabidopsis thaliana (Mouse-ear cress), partial (93%) [TC172927]
A_46_P076756	2.37733	7.61958	3.61939	64ETCOT5_T3_001_A01_14JAN2005_015 Brassica napus mature seed Normalized library at CoT 5 Brassica napus cDNA 5', mRNA sequence [EE437128]
A_46_P383798	2.5611	1.49661	1.53929	Rep: Cysteine-rich receptor-like protein kinase 10 precursor - Arabidopsis thaliana (Mouse-ear cress), partial (23%) [TC206280]	AT4G23180	Encodes a receptor-like protein kinase. Naming convention from Chen et al 2003 (PMID 14756307)
A_46_P076466	302.839	403.025	412.008	59ACAB6_UP_014_E11_26JUL2004_087 Brassica napus 59ACAB6 Brassica napus cDNA 5', mRNA sequence [EE420741]	AT4G17940	Tetratricopeptide repeat (TPR)-like superfamily protein; FUNCTIONS IN: binding; INVOLVED IN: biological_process unknown; EXPRESSED IN: 23 plant structures; EXPRESSED DURING: 15 growth stages; CONTAINS InterPro DOMAIN/s: Tetratricopeptide-like helical (Int
A_46_P246854	94.2263	118.823	115.822	Rep: Chromosome chr13 scaffold_48, whole genome shotgun sequence - Vitis vinifera (Grape), partial (32%) [TC206051]	AT3G55830	A member of the Glycosyltransferase Family 64, homologous to Poplar cambium-expressed GT64 gene. The EPC1 protein plays a critical role during plant development in maintaining the integrity of organs via cell-cell adhesion, thereby providing mechanical s
A_46_P313595	5.6169	5.35008	5.0043	Rep: Splicing factor 3a - Arabidopsis thaliana (Mouse-ear cress), partial (98%) [TC189561]	AT5G06160	Encodes a protein with similarity to pre-mRNA splicing factor SF3a60 that is involved in gametic cell fate determination. Loss of function results in the ectopic expression of egg cell makers suggesting a role in restriction of gametic cell fate. Express
A_46_P382193	1.22766	1.57354	2.37885	Rep: Arabidopsis thaliana genomic DNA, chromosome 3, P1 clone: MOE17 - Arabidopsis thaliana (Mouse-ear cress), partial (64%) [TC213085]	AT3G20720	unknown protein; FUNCTIONS IN: molecular_function unknown; INVOLVED IN: biological_process unknown; EXPRESSED IN: 22 plant structures; EXPRESSED DURING: 13 growth stages.
A_46_P041051	2.80971	2.77276	2.57343	BNDH2DCT_UP_009_A07_14JUN2004_063 Brassica napus seeds BNDH2DCT Brassica napus cDNA 5', mRNA sequence [DW997736]	AT3G61310	AT hook motif DNA-binding family protein; FUNCTIONS IN: DNA binding; INVOLVED IN: biological_process unknown; LOCATED IN: cellular_component unknown; EXPRESSED IN: 22 plant structures; EXPRESSED DURING: 13 growth stages; CONTAINS InterPro DOMAIN/s: Protei
A_46_P271913	2.12521	2.24708	2.42307	Rep: Magnesium-protoporphyrin IX monomethyl ester [oxidative] cyclase, chloroplast precursor - Arabidopsis thaliana (Mouse-ear cress), partial (39%) [TC195534]	AT3G56940	Encodes a putative ZIP protein with varying mRNA accumulation in leaves, stems and roots. Has a consensus carboxylate-bridged di-iron binding site.
A_46_P226999	1.94741	2.93336	2.46762	Rep: Agmatine deiminase - Arabidopsis thaliana (Mouse-ear cress), complete [TC179659]	AT5G08170	EMBRYO DEFECTIVE 1873 (EMB1873); CONTAINS InterPro DOMAIN/s: Agmatine deiminase (InterPro:IPR017754), Peptidyl-arginine deiminase, Porphyromonas-type (InterPro:IPR007466); Has 2547 Blast hits to 2545 proteins in 784 species: Archae - 10; Bacteria - 1723;
A_46_P246814	140.229	133.315	113.823	Rep: Chromosome chr18 scaffold_61, whole genome shotgun sequence - Vitis vinifera (Grape), partial (70%) [TC177976]
A_46_P291218	6.25698	7.70381	7.39395
A_46_P361035	1.9856	1.33945	2.07713	Rep: Thymidylate synthase - Vitis vinifera (Grape), partial (40%) [TC204118]	AT2G21550	Bifunctional dihydrofolate reductase/thymidylate synthase; FUNCTIONS IN: thymidylate synthase activity, dihydrofolate reductase activity; INVOLVED IN: oxidation reduction, glycine biosynthetic process, one-carbon metabolic process, nucleotide biosynthetic
A_46_P184089	3.7979	-3.33179	-5.62937
A_46_P313605	2.92491	2.15699	2.63771	BNSCS2CT_UP_062_C10_18APR2007_076 Brassica napus BNSCS2CT Brassica napus cDNA 5', mRNA sequence [EV020347]	AT2G34360	MATE efflux family protein; FUNCTIONS IN: antiporter activity, drug transmembrane transporter activity, transporter activity; INVOLVED IN: drug transmembrane transport, transmembrane transport; LOCATED IN: membrane; EXPRESSED IN: stem, inflorescence meris
A_46_P163179	2.0912	1.74858	1.62203	Rep: Zinc finger CCCH domain-containing protein ZFN-like 1 - Arabidopsis thaliana (Mouse-ear cress), partial (68%) [TC205464]
A_46_P367765	2.04523	2.76988	5.77825	0143641 Brassica napus Etiolated seedlings (Uni-ZAP) Brassica napus cDNA, mRNA sequence [EV166831]	AT5G66620	DA1-related protein 6 (DAR6); FUNCTIONS IN: zinc ion binding; EXPRESSED IN: 13 plant structures; EXPRESSED DURING: 8 growth stages; CONTAINS InterPro DOMAIN/s: Zinc finger, LIM-type (InterPro:IPR001781), Ubiquitin interacting motif (InterPro:IPR003903), P
A_46_P110434	445.641	364.571	292.974	0195288 Brassica napus Apical meristem Brassica napus cDNA, mRNA sequence [EV096769]	AT5G59000	RING/FYVE/PHD zinc finger superfamily protein; FUNCTIONS IN: zinc ion binding; INVOLVED IN: biological_process unknown; LOCATED IN: cellular_component unknown; EXPRESSED IN: 21 plant structures; EXPRESSED DURING: 13 growth stages; CONTAINS InterPro DOMAIN
A_46_P318125	46.5057	2.88016	4.53594	Rep: ABI3-interacting protein 2 - Arabidopsis thaliana (Mouse-ear cress), partial (95%) [TC163778]	AT5G20910	Encodes an E3 ligase that can interact with and polyubiquitinate ABI3 in vitro. AIP2 likely negatively regulates ABA signaling by targeting ABI3 for post-translational destruction.
A_46_P029516	12.4228	7.09713	6.49396	BNARO2GH_T3_001_G05_23NOV2006_035 Brassica napus BNARO2GH Brassica napus cDNA 5', mRNA sequence [ES909435]	AT1G10470	Encodes a two-component response regulator. Acts redundantly with ARR3 in the control of circadian period in a cytokinin-independent manner.
A_46_P330675	2.18897	1.90007	1.90755
A_46_P030491	1.91648	2.02423	1.873	BNDH4DCT_UP_034_A07_17DEC2004_063 Brassica napus seeds BNDH4DCT Brassica napus cDNA 5', mRNA sequence [DY007657]	AT5G66250	kinectin-related; INVOLVED IN: biological_process unknown; EXPRESSED IN: 24 plant structures; EXPRESSED DURING: 15 growth stages; BEST Arabidopsis thaliana protein match is: unknown protein (TAIR:AT2G17990.1).
A_46_P078746	1.99369	1.41524	2.04689	BNARO1GH_T3_018_E02_23NOV2006_008 Brassica napus BNARO1GH Brassica napus cDNA 5', mRNA sequence [ES901060]
A_46_P181339	1.5273	2.24391	3.11158	Rep: Expressed protein - Arabidopsis thaliana (Mouse-ear cress), complete [TC187007]	AT1G51420	sucrose-phosphatase 1 (SPP1); FUNCTIONS IN: phosphatase activity, magnesium ion binding, sucrose-phosphatase activity, catalytic activity; INVOLVED IN: sucrose biosynthetic process, metabolic process; LOCATED IN: plasma membrane; EXPRESSED IN: petal, leaf
A_46_P199284	2.97196	2.97245	2.47809
A_46_P198744	3.99368	3.52654	3.85341	Rep: Chromosome chr8 scaffold_106, whole genome shotgun sequence - Vitis vinifera (Grape), partial (41%) [TC208139]
A_46_P001986	2.20583	1.7733	1.42964	53COT2_T3_014_D01_03SEP2004_009 Brassica napus 36hr germinating seed library 53COT2 Brassica napus cDNA 5', mRNA sequence [DY025287]	AT5G58250	unknown protein; FUNCTIONS IN: molecular_function unknown; INVOLVED IN: biological_process unknown; LOCATED IN: thylakoid, chloroplast; EXPRESSED IN: 22 plant structures; EXPRESSED DURING: 14 growth stages; CONTAINS InterPro DOMAIN/s: Protein of unknown f
A_46_P150094	1.82385	2.07757	2.04521
A_46_P059716	734.734	832.859	749.478	65JKBNM0_T3_036_B12_18MAR2005_094 Brassica napus Normalized library CoT5 65JKBNM0 Brassica napus cDNA 5', mRNA sequence [EL589712]	AT4G29520	LOCATED IN: endoplasmic reticulum, plasma membrane; EXPRESSED IN: 23 plant structures; EXPRESSED DURING: 14 growth stages; CONTAINS InterPro DOMAIN/s: Saposin B (InterPro:IPR008139); Has 137 Blast hits to 137 proteins in 50 species: Archae - 2; Bacteria -
A_46_P057241	4.46984	2.31353	2.34346	53COT2_T3_010_A03_03SEP2004_031 Brassica napus 36hr germinating seed library 53COT2 Brassica napus cDNA 5', mRNA sequence [DY024891]	AT4G38680	Encodes a glycine-rich protein that binds nucleic acids and promotes DNA melting. Its transcript and protein levels are up-regulated in response to cold treatment with protein levels peaking earlier in shoots (~10-14 days) than in roots (~21 days). It is
A_46_P384588	2.09217	3.91604	3.54679	Rep: MtN3-like protein - Arabidopsis thaliana (Mouse-ear cress), partial (98%) [TC214137]	AT5G50800	Nodulin MtN3 family protein; LOCATED IN: endomembrane system, integral to membrane, membrane; EXPRESSED IN: 14 plant structures; EXPRESSED DURING: 9 growth stages; CONTAINS InterPro DOMAIN/s: MtN3/saliva-related transmembrane protein, conserved region (In
A_46_P259039	1.61414	2.08308	1.92092	Rep: Uncharacterized protein At5g27640.2 - Arabidopsis thaliana (Mouse-ear cress), partial (23%) [TC194809]	AT5G27640	encodes a member of eukaryotic translation initiation factor 3B family.
A_46_P282773	2.62714	4.07459	2.91344		AT3G47360	Encodes a putative hydroxysteroid dehydrogenase (HSD). Genes that encode HSD include: At5g50600 and At5g50700 (HSD1), At3g47350(HSD2), At3g47360(HSD3), At5g50590 and At5g50690(HSD4), At5g50770(HSD6) (Plant Cell Physiology 50:1463). Two copies of HSD1 a
A_46_P184059	2.15814	-1.34902	-1.36917		AT2G14610	PR1 gene expression is induced in response to a variety of pathogens. It is a useful molecular marker for the SAR response. Though the Genbank record for the cDNA associated to this gene is called 'PR-1-like', the sequence actually corresponds to PR1.
A_46_P087376	5.07983	6.02147	6.51134	EX20LIB7_UP_003_F08_03NOV2004_054 Brassica napus Ex 20-Lib7 Brassica napus cDNA 5', mRNA sequence [EE498430]	AT5G63890	Encodes histidinol dehydrogenase. Up-regulated in response to UV-B.
A_46_P182394	2.80954	1.49899	2.15134	Rep: Uncharacterized protein At5g20190.1 - Arabidopsis thaliana (Mouse-ear cress), partial (39%) [TC185403]	AT1G80130	Tetratricopeptide repeat (TPR)-like superfamily protein; FUNCTIONS IN: binding; INVOLVED IN: response to oxidative stress; LOCATED IN: membrane; EXPRESSED IN: 18 plant structures; EXPRESSED DURING: 12 growth stages; CONTAINS InterPro DOMAIN/s: Tetratricop
A_46_P228356	13.0681	2.99564	4.33631
A_46_P102024	5.71245	3.39819	6.10168	0116675 Brassica napus Senescent leaves Brassica napus cDNA, mRNA sequence [EV111363]
A_46_P382458	3.32946	3.46152	3.93164	Rep: T-complex protein 1 subunit alpha - Arabidopsis thaliana (Mouse-ear cress), partial (12%) [TC213192]	AT3G20050	Encodes a putative cytoplasmic chaperonin that is similar to mouse Tcp-1 (t complex polypeptide 1).
A_46_P001786	1.91198	1.54961	2.09832	0145777 Brassica napus Etiolated seedlings (Uni-ZAP) Brassica napus cDNA, mRNA sequence [EV168438]	AT3G09500	Ribosomal L29 family protein ; FUNCTIONS IN: structural constituent of ribosome; INVOLVED IN: translation, ribosome biogenesis; LOCATED IN: ribosome, cytosolic large ribosomal subunit, nucleolus; EXPRESSED IN: 22 plant structures; EXPRESSED DURING: 13 gro
A_46_P281698	2.04918	1.87827	1.9381		AT1G16920	small GTP-binding protein (Rab11)similar to YPT3/RAB11 proteins in yeast and mammals, respectively. YPT3/RAB11 is involved in intracellular protein trafficking.
A_46_P192124	18.5766	11.548	12.5577		AT2G19750	Ribosomal protein S30 family protein; FUNCTIONS IN: structural constituent of ribosome; INVOLVED IN: translation; LOCATED IN: cytosolic small ribosomal subunit, ribosome; EXPRESSED IN: 22 plant structures; EXPRESSED DURING: 13 growth stages; CONTAINS Inte
A_46_P068561	1.99994	1.81701	2.73129	0192416 Brassica napus Apical meristem Brassica napus cDNA, mRNA sequence [EV094415]	AT5G18650	CHY-type/CTCHY-type/RING-type Zinc finger protein; FUNCTIONS IN: zinc ion binding; EXPRESSED IN: 24 plant structures; EXPRESSED DURING: 15 growth stages; CONTAINS InterPro DOMAIN/s: Zinc finger, CTCHY-type (InterPro:IPR017921), Zinc finger, CHY-type (Inte
A_46_P371145	4.50689	4.057	3.22669	Rep: Mitogen-activated protein kinase 8 - Arabidopsis thaliana (Mouse-ear cress), partial (10%) [TC208580]
A_46_P347225	1.71422	1.68287	2.33543	Rep: Ferritin - Chorispora bungeana (Blue mustard), partial (39%) [TC197135]	AT3G56090	Encodes FERRITIN 3, AtFER3. Ferritins are a class of 24-mer multi-meric proteins found in all kingdoms of life. Function as the main iron store in mammals. Evidence suggests that Arabidopsis ferritins are essential to protect cells against oxidative da
A_46_P219899	10.8374	3.57054	4.53488	Rep: AT5g58640/mzn1_90 - Arabidopsis thaliana (Mouse-ear cress), partial (97%) [TC200780]
A_46_P062036	2.18805	1.94097	1.44011		AT1G09690	Translation protein SH3-like family protein; FUNCTIONS IN: structural constituent of ribosome; INVOLVED IN: translation; LOCATED IN: ribosome, cytosolic large ribosomal subunit; EXPRESSED IN: juvenile leaf, pollen tube; CONTAINS InterPro DOMAIN/s: Transla
A_46_P241344	11.9922	3.30785	5.61677	24RDBNH_UP_125_C11_12DEC2006_091 Brassica napus 24RDBNH Brassica napus cDNA 5', mRNA sequence [ES917750]	AT1G66780	MATE efflux family protein; FUNCTIONS IN: antiporter activity, drug transmembrane transporter activity, transporter activity; INVOLVED IN: drug transmembrane transport, transmembrane transport; LOCATED IN: membrane; EXPRESSED IN: 14 plant structures; EXPR
A_46_P372735	33.4114	49.4783	54.9425	Rep: Lectin-receptor like protein kinase 1 - Nicotiana tabacum (Common tobacco), partial (46%) [TC209217]	AT4G04960	Concanavalin A-like lectin protein kinase family protein; FUNCTIONS IN: kinase activity; INVOLVED IN: protein amino acid phosphorylation; LOCATED IN: endomembrane system; EXPRESSED IN: 21 plant structures; EXPRESSED DURING: 12 growth stages; CONTAINS Inte
A_46_P250089	6.15263	4.11779	3.32064	Rep: Uncharacterized protein At2g21940.2 - Arabidopsis thaliana (Mouse-ear cress), partial (91%) [TC180824]
A_46_P263538	1.95055	2.304	2.21762	Rep: At1g10600 - Arabidopsis thaliana (Mouse-ear cress), partial (89%) [TC169447]
A_46_P085781	2.01726	1.81254	1.83723	BNAR05GH_T3_001_D09_17NOV2006_073 Brassica napus BNARO5GH Brassica napus cDNA 5', mRNA sequence [ES903642]	AT5G28290	Encodes AtNek3, a member of the NIMA-related serine/threonine kinases (Neks) that have been linked to cell-cycle regulation in fungi and mammals. Plant Neks might be involved in plant development processes.
A_46_P156949	5.61441	5.33578	5.63114	Rep: Lysyl-tRNA synthetase - Arabidopsis thaliana (Mouse-ear cress), partial (45%) [TC192571]	AT3G11710	lysyl-tRNA synthetase 1 (ATKRS-1); FUNCTIONS IN: ATP binding, lysine-tRNA ligase activity; INVOLVED IN: lysyl-tRNA aminoacylation, translation, tRNA aminoacylation for protein translation; LOCATED IN: cytoplasm; EXPRESSED IN: 24 plant structures; EXPRESSE
A_46_P320885	2.03381	2.15926	1.60602	Rep: Os06g0571300 protein - Oryza sativa subsp. japonica (Rice), partial (31%) [TC178281]	AT2G45320	unknown protein; FUNCTIONS IN: molecular_function unknown; INVOLVED IN: biological_process unknown; LOCATED IN: mitochondrion; EXPRESSED IN: 20 plant structures; EXPRESSED DURING: 10 growth stages; Has 45 Blast hits to 45 proteins in 16 species: Archae -
A_46_P324905	1.45423	2.75412	2.67948	Rep: At1g14250 - Arabidopsis thaliana (Mouse-ear cress), partial (75%) [TC187331]	AT1G14250	GDA1/CD39 nucleoside phosphatase family protein; FUNCTIONS IN: hydrolase activity; INVOLVED IN: biological_process unknown; LOCATED IN: vacuole; EXPRESSED IN: male gametophyte, cultured cell, pollen tube; EXPRESSED DURING: L mature pollen stage, M germina
A_46_P047506	1621.87	3721.78	3277.66	24RDBNH_UP_053_D10_29FEB2004_074 Brassica napus 24RDBNH Brassica napus cDNA 5', mRNA sequence [EE508232]	AT3G09160	RNA-binding (RRM/RBD/RNP motifs) family protein; FUNCTIONS IN: nucleotide binding, nucleic acid binding; INVOLVED IN: biological_process unknown; LOCATED IN: cellular_component unknown; EXPRESSED IN: 10 plant structures; EXPRESSED DURING: 4 anthesis, peta
A_46_P054741	4.56639	4.42189	2.9457	0105324 Brassica napus Damaged cotyledons Brassica napus cDNA, mRNA sequence [EV223398]	AT3G26510	Octicosapeptide/Phox/Bem1p family protein; CONTAINS InterPro DOMAIN/s: Octicosapeptide/Phox/Bem1p (InterPro:IPR000270); BEST Arabidopsis thaliana protein match is: octicosapeptide/Phox/Bem1p (PB1) domain-containing protein (TAIR:AT1G70640.1); Has 35333 Bl
A_46_P217014	2.18719	1.4986	1.37235	Rep: Chromosome undetermined scaffold_111, whole genome shotgun sequence - Paramecium tetraurelia, partial (7%) [TC211642]	AT3G20770	Encodes EIN3 (ethylene-insensitive3), a nuclear transcription factor that initiates downstream transcriptional cascades for ethylene responses.
A_46_P270533	8.59142	8.85981	10.3817		AT4G05060	PapD-like superfamily protein; FUNCTIONS IN: structural molecule activity; INVOLVED IN: biological_process unknown; LOCATED IN: chloroplast; EXPRESSED IN: 22 plant structures; EXPRESSED DURING: 13 growth stages; CONTAINS InterPro DOMAIN/s: PapD-like (Inte
A_46_P154549	1.99237	2.07794	2.18917		AT5G53070	Ribosomal protein L9/RNase H1; FUNCTIONS IN: structural constituent of ribosome; INVOLVED IN: translation, ribosome biogenesis; LOCATED IN: ribosome, intracellular; EXPRESSED IN: 19 plant structures; EXPRESSED DURING: 13 growth stages; CONTAINS InterPro D
A_46_P194184	2.08575	1.46392	1.34406	Rep: At1g32920/F9L11_25 - Arabidopsis thaliana (Mouse-ear cress), partial (78%) [TC201272]	AT1G32920	unknown protein; FUNCTIONS IN: molecular_function unknown; INVOLVED IN: response to wounding; LOCATED IN: endomembrane system; EXPRESSED IN: 23 plant structures; EXPRESSED DURING: 13 growth stages; BEST Arabidopsis thaliana protein match is: unknown prote
A_46_P244704	3.35156	4.5933	3.46231
A_46_P246979	355.524	342.996	349.634	Rep: Uncharacterized protein At1g04590.2 - Arabidopsis thaliana (Mouse-ear cress), partial (67%) [TC177924]
A_46_P013511	2.39095	2.21325	2.06419	RFO2.112F20F010523 RFO2 Brassica napus cDNA clone RFO2112F20, mRNA sequence [CD838727]	AT4G05497	RNI-like superfamily protein; CONTAINS InterPro DOMAIN/s: F-box domain, cyclin-like (InterPro:IPR001810); BEST Arabidopsis thaliana protein match is: RNI-like superfamily protein (TAIR:AT4G05460.1); Has 1787 Blast hits to 1493 proteins in 145 species: Arc
A_46_P168824	3.12821	4.17634	4.38771	Rep: Eukaryotic translation initiation factor 5A-3 - Arabidopsis thaliana (Mouse-ear cress), complete [TC171112]	AT1G69410	Encodes eIF5A-2, a putative eukaryotic translation initiation factor. There are three eIF5A coding genes in Arabidopsis: eIF5A-1/At1g13950, eIF5A-2/At1g26630 and eIF5A-3/At1g69410.
A_46_P136054	2.5487	2.20128	2.18368	Rep: Adenosine nucleotide translocator - Brassica oleracea var. acephala (Flowering kale), complete [TC162979]
A_46_P105809	1.77094	2.51448	2.76197	BNAEN1GH_UP_031_D10_23JUN2006_074 Brassica napus BNAEN1GH Brassica napus cDNA 5', mRNA sequence [ES988396]
A_46_P329725	1.68856	2.24876	2.02553	Rep: Nuclear RNA binding protein A-like protein - Arabidopsis thaliana (Mouse-ear cress), partial (52%) [TC212650]	AT4G17520	Hyaluronan / mRNA binding family; FUNCTIONS IN: RNA binding; INVOLVED IN: biological_process unknown; LOCATED IN: nucleus, peroxisome; EXPRESSED IN: 23 plant structures; EXPRESSED DURING: 14 growth stages; CONTAINS InterPro DOMAIN/s: Stm1, N-terminal (Int
A_46_P168074	14.0679	2.59013	3.69129	Rep: Chromosome chr6 scaffold_15, whole genome shotgun sequence - Vitis vinifera (Grape), partial (73%) [TC173501]	AT5G22120	unknown protein; FUNCTIONS IN: molecular_function unknown; INVOLVED IN: biological_process unknown; LOCATED IN: cellular_component unknown; EXPRESSED IN: cultured cell; Has 30201 Blast hits to 17322 proteins in 780 species: Archae - 12; Bacteria - 1396; M
A_46_P333915	1.31933	1.51057	2.33739	0112419 Brassica napus Senescent leaves Brassica napus cDNA, mRNA sequence [EV107107]
A_46_P094251	3.19659	1.72509	1.95172	Rep: At1g60710/F8A5_23 - Arabidopsis thaliana (Mouse-ear cress), complete [TC167298]	AT1G60690	NAD(P)-linked oxidoreductase superfamily protein; FUNCTIONS IN: oxidoreductase activity, aldo-keto reductase activity; INVOLVED IN: oxidation reduction; LOCATED IN: plasma membrane, chloroplast envelope; EXPRESSED IN: 22 plant structures; EXPRESSED DURING
A_46_P009581	2.04395	1.62022	1.6832	B.napus mRNA for jasmonate inducible protein, 2268bp [Y11483]
A_46_P005556	4.03687	1.79506	1.163	24RDBNH_UP_140_C08_13DEC2006_060 Brassica napus 24RDBNH Brassica napus cDNA 5', mRNA sequence [ES919080]	AT2G34700	Pollen Ole e 1 allergen and extensin family protein; FUNCTIONS IN: molecular_function unknown; INVOLVED IN: biological_process unknown; LOCATED IN: endomembrane system; EXPRESSED IN: 6 plant structures; EXPRESSED DURING: 4 anthesis, petal differentiation
A_46_P280678	1.69589	1.94454	2.01801		AT3G60830	Encodes an actin-related protein required for normal embryogenesis, plant architecture and floral organ abscission.
A_46_P082311	4.37534	-1.63926	-3.70708	0099199 Brassica napus Cold acclimation - light Brassica napus cDNA, mRNA sequence [EV198046]	AT5G24530	Encodes a putative 2OG-Fe(II) oxygenase that is defense-associated but required for susceptibility to downy mildew.
A_46_P248774	2.19156	2.21864	2.32583	Rep: Steroid membrane binding protein-like - Oryza sativa subsp. japonica (Rice), partial (22%) [TC184084]	AT3G48890	putative progesterone-binding protein homolog (Atmp2) mRNA,
A_46_P206574	3.73391	4.34192	3.25498	0155360 Brassica napus Etiolated seedlings (Uni-ZAP) Brassica napus cDNA, mRNA sequence [EV172935]
A_46_P072721	3.42862	2.33203	3.3239	BNYS6DCT_UP_030_B02_06MAY2005_014 Brassica napus seeds BNYS6DCT Brassica napus cDNA 5', mRNA sequence [EE480328]
A_46_P381598	11.8532	5.53671	4.1105	0147086 Brassica napus Etiolated seedlings (pSPORT1) Brassica napus cDNA, mRNA sequence [EV177848]	AT2G37710	Induced in response to Salicylic acid.
A_46_P359055	9.49872	23.6266	11.4745	Rep: Serine/arginine-rich protein - Arabidopsis thaliana (Mouse-ear cress), partial (14%) [TC203161]
A_46_P150939	2.25851	2.26326	2.39987		AT1G65650	UCH2; CONTAINS InterPro DOMAIN/s: Peptidase C12, ubiquitin carboxyl-terminal hydrolase 1 (InterPro:IPR001578), Ubiquitinyl hydrolase, UCH37 type (InterPro:IPR017390); BEST Arabidopsis thaliana protein match is: Peptidase C12, ubiquitin carboxyl-terminal h
A_46_P238709	1.84456	2.83972	2.24324	BNARO2GH_T3_019_G06_15DEC2006_036 Brassica napus BNARO2GH Brassica napus cDNA 5', mRNA sequence [ES912332]
A_46_P381678	2.26933	1.76102	1.90699	Rep: Clathrin binding protein-like - Arabidopsis thaliana (Mouse-ear cress), partial (30%) [TC212863]	AT5G11710	EPSIN1 plays an important role in the vacuolar trafficking of soluble proteins at the trans-Golgi network via its interaction with gamma-ADR, VTI11, VSR1, and clathrin. Associated with actin filaments and with the Golgi complex. Expressed in most tissue
A_46_P362030	2.2859	2.34104	1.92462	Rep: IAA-amino acid hydrolase - Arabidopsis thaliana (Mouse-ear cress), partial (23%) [TC196171]	AT3G02875	Hydrolyzes amino acid conjugates of the plant growth regulator indole-3-acetic acid (IAA), including IAA-Leu and IAA-Phe. Uses Mg and Co ions as cofactors.
A_46_P198964	1.3474	1.385	4.04304	BNARO6GH_T3_007_A02_6DEC2006_016 Brassica napus BNARO6GH Brassica napus cDNA 5', mRNA sequence [ES908927]
A_46_P213654	-1.12401	1.38758	2.00234	64ETCOT5_T3_006_B02_12JAN2005_014 Brassica napus mature seed Normalized library at CoT 5 Brassica napus cDNA 5', mRNA sequence [EE437597]
A_46_P088861	2.39739	2.0776	4.78247	24RDBNH_UP_053_C01_29FEB2004_011 Brassica napus 24RDBNH Brassica napus cDNA 5', mRNA sequence [EE508211]
A_46_P294323	2.33923	2.31	1.7687	Rep: Ribosomal protein S27 - Brassica campestris (Field mustard), complete [TC190123]	AT2G45710	Zinc-binding ribosomal protein family protein; FUNCTIONS IN: structural constituent of ribosome; INVOLVED IN: translation, ribosome biogenesis; LOCATED IN: cytosolic small ribosomal subunit, cytosolic ribosome, ribosome, nucleolus, plasma membrane; EXPRES
A_46_P205719	5.14701	4.78935	5.81075	Rep: Invertase-like protein - Arabidopsis thaliana (Mouse-ear cress), partial (83%) [TC163499]
A_46_P150349	2.07226	1.88922	1.82822		AT3G11730	Encodes a member of the Rab GTPase family of proteins. This protein interacts with the tail region of a myosin XI protein (AT5G43900) in a GTP-dependent manner. It has also been identified as an isoprenylated protein.
A_46_P370810	3.60118	4.30676	11.8756	Rep: Cyclin-B1-2 - Arabidopsis thaliana (Mouse-ear cress), partial (8%) [TC208437]
A_46_P190179	2.61582	3.38223	3.26204
A_46_P234149	2.8161	2.04394	1.46459	Rep: Berberine bridge enzyme - Arabidopsis thaliana (Mouse-ear cress), partial (97%) [TC171005]	AT5G44400	FAD-binding Berberine family protein; FUNCTIONS IN: electron carrier activity, oxidoreductase activity, FAD binding, catalytic activity; LOCATED IN: cell wall; EXPRESSED IN: 18 plant structures; EXPRESSED DURING: 10 growth stages; CONTAINS InterPro DOMAIN
A_46_P332490	2.00033	1.43712	1.17784	0148536 Brassica napus Etiolated seedlings (pSPORT1) Brassica napus cDNA, mRNA sequence [EV178630]	AT5G24660	RESPONSE TO LOW SULFUR 2 (LSU2); BEST Arabidopsis thaliana protein match is: response to low sulfur 4 (TAIR:AT5G24655.1); Has 1807 Blast hits to 1807 proteins in 277 species: Archae - 0; Bacteria - 0; Metazoa - 736; Fungi - 347; Plants - 385; Viruses - 0;
A_46_P131584	2.13412	2.53978	2.63424		AT1G09690	Translation protein SH3-like family protein; FUNCTIONS IN: structural constituent of ribosome; INVOLVED IN: translation; LOCATED IN: ribosome, cytosolic large ribosomal subunit; EXPRESSED IN: juvenile leaf, pollen tube; CONTAINS InterPro DOMAIN/s: Transla
A_46_P277173	1.55783	1.67785	2.02985	Rep: Glutamate dehydrogenase 2 - Arabidopsis thaliana (Mouse-ear cress), partial (36%) [TC189248]
A_46_P076236	2.11903	2.55589	3.09831	BNSCS1CT_UP_106_G07_20APR2007_051 Brassica napus BNSCS1CT Brassica napus cDNA 5', mRNA sequence [EV017208]	AT1G63420	CONTAINS InterPro DOMAIN/s: Lipopolysaccharide-modifying protein (InterPro:IPR006598), Protein of unknown function DUF821, CAP10-like (InterPro:IPR008539); BEST Arabidopsis thaliana protein match is: Arabidopsis thaliana protein of unknown function (DUF82
A_46_P130289	2.94465	5.67063	7.71336	BNSCS4CT_UP_065_B01_18MAY2007_013 Brassica napus BNSCS4CT Brassica napus cDNA 5', mRNA sequence [EV063269]	AT3G11480	The gene encodes a SABATH methyltransferase that methylates both salicylic acid and benzoic acid. It is highly expressed in flowers, induced by biotic and abiotic stress and thought to be involved in direct defense mechanism.
A_46_P274903	2.58225	4.63044	8.26261	Rep: WSSV375 - White spot syndrome virus (WSSV), partial (42%) [TC210530]
A_46_P068606	2.11126	1.96803	2.48342	9RDBNGA_UP_162_E07_12MAR2006_055 Brassica napus 9RDBNGA Brassica napus cDNA 5', mRNA sequence [ES957248]
A_46_P214494	2.46703	1.86875	2.18094	Rep: TIP - Arabidopsis thaliana (Mouse-ear cress), partial (37%) [TC197537]	AT5G24590	Member of NAc protein family. Interacts with turnip crinkle virus (TCV) capsid protein. Transcription factor involved in regulating the defense response of Arabidopsis to TCV.
A_46_P078101	1.9788	2.05634	1.84164	BNAEN3GH_UP_134_D07_1ONOV2006_057 Brassica napus BNAEN3GH Brassica napus cDNA 5', mRNA sequence [EV003637]	AT1G60230	Radical SAM superfamily protein; FUNCTIONS IN: iron-sulfur cluster binding, catalytic activity, RNA methyltransferase activity; INVOLVED IN: rRNA processing; LOCATED IN: cytoplasm; EXPRESSED IN: 6 plant structures; EXPRESSED DURING: LP.04 four leaves visi
A_46_P366955	2.69994	2.91991	1.96851
A_46_P167269	2.89648	2.11564	1.34273	Rep: ATP binding - Arabidopsis thaliana, partial (28%) [TC164269]	AT3G07770	HEAT SHOCK PROTEIN 89.1 (Hsp89.1); FUNCTIONS IN: ATP binding; INVOLVED IN: protein folding, response to stress; LOCATED IN: mitochondrion, cell wall; EXPRESSED IN: 24 plant structures; EXPRESSED DURING: 14 growth stages; CONTAINS InterPro DOMAIN/s: Chaper
A_46_P342660	3.72427	4.57466	2.54582	Rep: F2E2.16 - Arabidopsis thaliana (Mouse-ear cress), partial (10%) [TC194384]	AT3G58780	One of two genes (SHP1 and SHP2) that are required for fruit dehiscence. The two genes control dehiscence zone differentiation and promote the lignification of adjacent cells.
A_46_P206069	1.62193	1.79564	2.47795	Rep: Probable 6-phosphogluconolactonase 1 - Arabidopsis thaliana (Mouse-ear cress), partial (56%) [TC198379]	AT1G13700	6-phosphogluconolactonase 1 (PGL1); FUNCTIONS IN: 6-phosphogluconolactonase activity, catalytic activity; INVOLVED IN: pentose-phosphate shunt, carbohydrate metabolic process; LOCATED IN: cellular_component unknown; EXPRESSED IN: 11 plant structures; EXPR
A_46_P239199	2.37322	1.79696	1.32965		AT1G18710	Member of the R2R3 factor gene family.
A_46_P048041	8.1847	15.6523	11.7755	63JKCOT5_T3_008_E01_04JAN2005_007 63JKCOT5 Brassica napus cDNA 5', mRNA sequence [DY017895]
A_46_P265883	2.3458	2.27923	2.62416	Rep: Diaminopimelate epimerase, chloroplast precursor - Arabidopsis thaliana (Mouse-ear cress), complete [TC181592]	AT3G53580	diaminopimelate epimerase family protein; FUNCTIONS IN: diaminopimelate epimerase activity; INVOLVED IN: lysine biosynthetic process via diaminopimelate; LOCATED IN: chloroplast; EXPRESSED IN: 24 plant structures; EXPRESSED DURING: 15 growth stages; CONTA
A_46_P029781	1.87942	2.66134	1.58075	4ETGS72H_UP_014_E01_14FEB2005_007 Brassica napus 4ETGS72h Brassica napus cDNA 5', mRNA sequence [EE434042]	AT4G17215	Pollen Ole e 1 allergen and extensin family protein; CONTAINS InterPro DOMAIN/s: Pollen Ole e 1 allergen/extensin (InterPro:IPR006041); BEST Arabidopsis thaliana protein match is: Pollen Ole e 1 allergen and extensin family protein (TAIR:AT5G47635.1); Has
A_46_P280903	8.71126	6.35579	8.49097	BNZB_UP_122_F07_23SEP2005_053 Brassica napus BNZB Brassica napus cDNA 5', mRNA sequence [EE565540]	AT1G04130	Encodes one of the 36 carboxylate clamp (CC)-tetratricopeptide repeat (TPR) proteins (Prasad 2010, Pubmed ID: 20856808). Interacts with Hsp90/Hsp70 as co-chaperone.
A_46_P065361	2.02383	2.04334	2.46414	BNARO2GH_T3_001_E12_23NOV2006_088 Brassica napus BNARO2GH Brassica napus cDNA 5', mRNA sequence [ES909419]	AT1G21910	encodes a member of the DREB subfamily A-5 of ERF/AP2 transcription factor family. The protein contains one AP2 domain. There are 15 members in this subfamily including RAP2.1, RAP2.9 and RAP2.10.
A_46_P249474	3.00214	1.91519	1.73549	Rep: F-box/kelch-repeat protein SKIP6 - Arabidopsis thaliana (Mouse-ear cress), partial (25%) [TC208821]	AT2G21950	Encodes an SKP1 interacting partner (SKIP6).
A_46_P331025	2.9113	1.44889	2.06876	Rep: Uncharacterized protein At1g14870 - Arabidopsis thaliana (Mouse-ear cress), partial (98%) [TC177739]	AT1G14870	PCR2 encodes a membrane protein involved in zinc transport and detoxification.
A_46_P165944	1.95594	2.34431	2.46629		AT5G47780	Encodes a protein with putative galacturonosyltransferase activity.
A_46_P059336	2.24925	1.90421	1.97025	0152813 Brassica napus Etiolated seedlings (pSPORT1) Brassica napus cDNA, mRNA sequence [EV180904]
A_46_P076146	2.0609	2.01027	3.48814	61RDBNCM_UP_017_F08_12NOV2004_054 Brassica napus 61RDBNCM Brassica napus cDNA 5', mRNA sequence [EE537426]	AT1G12845	unknown protein; FUNCTIONS IN: molecular_function unknown; INVOLVED IN: biological_process unknown; LOCATED IN: endomembrane system; EXPRESSED IN: 22 plant structures; EXPRESSED DURING: 13 growth stages; Has 8 Blast hits to 8 proteins in 4 species: Archae
A_46_P029891	2.28258	2.89745	3.0867	0144527 Brassica napus Etiolated seedlings (Uni-ZAP) Brassica napus cDNA, mRNA sequence [EV167717]	AT2G01520	Encodes a cis-cinnamic acid responsive gene that is a member of the major latex protein-like gene family and plays a role in promoting vegetative growth and delaying &#64258;owering.
A_46_P373590	1.93227	2.07428	2.11133	Rep: At2g35430 - Arabidopsis thaliana (Mouse-ear cress), partial (36%) [TC209546]	AT2G35430	Zinc finger C-x8-C-x5-C-x3-H type family protein; CONTAINS InterPro DOMAIN/s: Zinc finger, CCCH-type (InterPro:IPR000571); BEST Arabidopsis thaliana protein match is: Zinc finger (CCCH-type) family protein (TAIR:AT1G32360.1); Has 35333 Blast hits to 34131
A_46_P332050	3.12813	2.35457	2.03358	Rep: Probable small nuclear ribonucleoprotein G - Arabidopsis thaliana (Mouse-ear cress), complete [TC187218]	AT2G23930	probable small nuclear ribonucleoprotein G (SNRNP-G); CONTAINS InterPro DOMAIN/s: Like-Sm ribonucleoprotein (LSM) domain (InterPro:IPR001163), Like-Sm ribonucleoprotein (LSM)-related domain (InterPro:IPR010920), Like-Sm ribonucleoprotein (LSM) domain, euk
A_46_P229939	4.59892	5.10272	5.22186	BNARO2GH_T3_012_B04_15DEC2006_030 Brassica napus BNARO2GH Brassica napus cDNA 5', mRNA sequence [ES911619]	AT4G31450	RING/U-box superfamily protein; FUNCTIONS IN: zinc ion binding; EXPRESSED IN: 22 plant structures; EXPRESSED DURING: 15 growth stages; CONTAINS InterPro DOMAIN/s: Zinc finger, RING-type (InterPro:IPR001841), Zinc finger, C3HC4 RING-type (InterPro:IPR01895
A_46_P286963	2.30973	1.93936	2.68896		AT4G30960	Encodes CBL-interacting protein kinase 6 (CIPK6). Required for development and salt tolerance.
A_46_P280518	594.208	443.949	887.057		AT3G09390	metallothionein, binds to and detoxifies excess copper and other metals, limiting oxidative damage
A_46_P291338	2.1756	-6.03736	-11.3779		AT3G56400	member of WRKY Transcription Factor; Group III. Function as activator of SA-dependent defense genes and a repressor of JA-regulated genes. WRKY70-controlled suppression of JA-signaling is partly executed by NPR1.
A_46_P174189	2.10559	2.14545	2.01891	Rep: Ribonuclease P protein component - Nocardia farcinica, partial (6%) [TC177969]
A_46_P369350	-1.0528	2.9237	1.47778
A_46_P267628	2.84903	2.42247	2.58848	64ETCOT5_T3_003_A10_15JAN2005_080 Brassica napus mature seed Normalized library at CoT 5 Brassica napus cDNA 5', mRNA sequence [EE437323]	AT4G04770	Encodes an iron-stimulated ATPase. A member of the NAP subfamily of ABC transporters. Involved in Fe-S cluster assembly. Similar to SufB. Involved in the regulation of iron homeostasis. Able to form homodimers. Interacts with AtNAP7 inside the chloroplast
A_46_P348010	2.17988	1.68455	1.48873	Rep: Cinnamate 4-hydroxylase isoform 2 - Brassica napus (Rape), partial (21%) [TC197523]	AT2G30490	Encodes a cinnamate-4-hydroxylase. Mutations in this gene impact phenylpropanoid metabolism, growth and development.
A_46_P275318	2.83775	-1.54589	1.0612	0113688 Brassica napus Senescent leaves Brassica napus cDNA, mRNA sequence [EV108376]
A_46_P102424	3.43618	1.52355	2.31195	BNARO2GH_T3_010_G07_15DEC2006_051 Brassica napus BNARO2GH Brassica napus cDNA 5', mRNA sequence [ES911490]
A_46_P346330	3.81215	2.2338	1.95041	Rep: UPF0497 membrane protein At4g16442 - Arabidopsis thaliana (Mouse-ear cress), partial (66%) [TC196557]	AT4G16442	Uncharacterised protein family (UPF0497); FUNCTIONS IN: molecular_function unknown; INVOLVED IN: biological_process unknown; LOCATED IN: endomembrane system; EXPRESSED IN: 21 plant structures; EXPRESSED DURING: 13 growth stages; CONTAINS InterPro DOMAIN/s
A_46_P337465	4.24271	-1.71938	-3.85116	0099199 Brassica napus Cold acclimation - light Brassica napus cDNA, mRNA sequence [EV198046]	AT5G24530	Encodes a putative 2OG-Fe(II) oxygenase that is defense-associated but required for susceptibility to downy mildew.
A_46_P213379	1.50891	2.7884	1.47123	Rep: Transcriptional regulator, GntR family - Dechloromonas aromatica (strain RCB), partial (8%) [TC199639]
A_46_P137549	2.47442	2.50861	1.50512	Rep: Oxylase-like protein - Arabidopsis thaliana (Mouse-ear cress), partial (63%) [TC163412]
A_46_P382818	3.6158	2.2552	2.22861	Rep: F21B7.19 - Arabidopsis thaliana (Mouse-ear cress), partial (28%) [TC213354]	AT1G03580	pseudogene, meprin and TRAF homology (MATH) domain protein -related, weak similarity to ubiquitin-specific protease 12 (Arabidopsis thaliana) GI:11993471; contains weak hit to Pfam PF00917: MATH domain
A_46_P176874	2.21349	2.61059	2.88522	Rep: Replication factor C large subunit-like protein - Arabidopsis thaliana (Mouse-ear cress), partial (48%) [TC171729]	AT5G22010	Encodes RFC1, the largest subunit of replication factor C. Mediates genomic stability and transcriptional gene silencing.
A_46_P154509	2.19015	1.4732	1.58017		AT3G20370	TRAF-like family protein; FUNCTIONS IN: molecular_function unknown; INVOLVED IN: biological_process unknown; LOCATED IN: membrane; EXPRESSED IN: 6 plant structures; EXPRESSED DURING: seedling growth; CONTAINS InterPro DOMAIN/s: TRAF-like (InterPro:IPR0089
A_46_P173179	2.63257	1.25981	2.12536	Rep: 185/333 - Strongylocentrotus purpuratus (Purple sea urchin), partial (5%) [TC204107]
A_46_P328030	3.81382	5.16172	2.80793	Rep: Chromosome chr7 scaffold_42, whole genome shotgun sequence - Vitis vinifera (Grape), partial (32%) [TC184363]	AT2G47630	alpha/beta-Hydrolases superfamily protein; FUNCTIONS IN: catalytic activity; LOCATED IN: plasma membrane; EXPRESSED IN: 19 plant structures; EXPRESSED DURING: 11 growth stages; BEST Arabidopsis thaliana protein match is: alpha/beta-Hydrolases superfamily
A_46_P115959	2.25358	-1.90636	-2.91759	Brassica napus WRKY70-1 transcription factor (WRKY70-1) mRNA, complete cds [EU912415]	AT3G56400	member of WRKY Transcription Factor; Group III. Function as activator of SA-dependent defense genes and a repressor of JA-regulated genes. WRKY70-controlled suppression of JA-signaling is partly executed by NPR1.
A_46_P203354	2.08781	2.02304	1.60804	Rep: Serine carboxypeptidase-like 42 precursor - Arabidopsis thaliana (Mouse-ear cress), partial (35%) [TC192146]
A_46_P315450	2.76857	3.52415	2.83574	AAC26697.1 - Arabidopsis thaliana (Mouse-ear cress), partial (19%) [TC172823]	AT3G18890	NAD(P)-binding Rossmann-fold superfamily protein; FUNCTIONS IN: binding, catalytic activity; INVOLVED IN: metabolic process; LOCATED IN: chloroplast thylakoid membrane, chloroplast, chloroplast envelope; EXPRESSED IN: 21 plant structures; EXPRESSED DURING
A_46_P152087	1.27786	2.22572	1.54076	Rep: Uncharacterized protein At1g07170/At2g30000 - Arabidopsis thaliana (Mouse-ear cress), complete [TC183208]	AT2G30000	PHF5-like protein; CONTAINS InterPro DOMAIN/s: PHF5-like (InterPro:IPR005345); BEST Arabidopsis thaliana protein match is: PHF5-like protein (TAIR:AT1G07170.3); Has 420 Blast hits to 420 proteins in 206 species: Archae - 0; Bacteria - 0; Metazoa - 129; Fu
A_46_P024111	5.1704	1.62031	1.06935	BN20.001I06F010914 BN20 Brassica napus cDNA clone BN20001I06, mRNA sequence [CD816718]	AT3G25882	encodes a kinase that physically interacts with NPR1/NIM1
A_46_P018656	2.33294	1.64556	1.61368	BNSCS2CT_UP_005_H01_05JAN2005_001 Brassica napus seed coat BNSCS2CT Brassica napus cDNA 5', mRNA sequence [EE463109]
A_46_P363600	1.53793	1.32064	2.30231	Rep: T6K12.3 protein - Arabidopsis thaliana (Mouse-ear cress), partial (92%) [TC205306]	AT3G04350	Plant protein of unknown function (DUF946); CONTAINS InterPro DOMAIN/s: Protein of unknown function DUF946 (InterPro:IPR009291); BEST Arabidopsis thaliana protein match is: Plant protein of unknown function (DUF946) (TAIR:AT5G18490.1); Has 389 Blast hits
A_46_P243084	15.5999	18.5747	31.0328	Rep: Squalene monooxygenase 1,1 - Brassica napus (Rape), complete [TC161640]
A_46_P004606	4.41693	4.56625	4.24824	BN45.053E14F020108 BN45 Brassica napus cDNA clone BN45053E14, mRNA sequence [CD837706]	AT5G44170	S-adenosyl-L-methionine-dependent methyltransferases superfamily protein; CONTAINS InterPro DOMAIN/s: Methyltransferase-16, putative (InterPro:IPR019410); BEST Arabidopsis thaliana protein match is: S-adenosyl-L-methionine-dependent methyltransferases sup
A_46_P252199	2.87036	2.76214	2.90071		AT5G05987	prenylated RAB acceptor 1.A2 (PRA1.A2); CONTAINS InterPro DOMAIN/s: Prenylated rab acceptor PRA1 (InterPro:IPR004895); BEST Arabidopsis thaliana protein match is: Cysteine/Histidine-rich C1 domain family protein (TAIR:AT3G11402.2); Has 291 Blast hits to 2
A_46_P166204	1.88083	1.78632	2.0783	Rep: Chromosome chr1 scaffold_180, whole genome shotgun sequence - Vitis vinifera (Grape), partial (52%) [TC205792]	AT5G13100	unknown protein; Has 1807 Blast hits to 1807 proteins in 277 species: Archae - 0; Bacteria - 0; Metazoa - 736; Fungi - 347; Plants - 385; Viruses - 0; Other Eukaryotes - 339 (source: NCBI BLink).
A_46_P118259	1.4756	1.88987	2.03851	0171210 Brassica napus Flower Brassica napus cDNA, mRNA sequence [EV135805]	AT3G28007	Nodulin MtN3 family protein; LOCATED IN: endomembrane system, integral to membrane, membrane; EXPRESSED IN: 15 plant structures; EXPRESSED DURING: 8 growth stages; CONTAINS InterPro DOMAIN/s: MtN3/saliva-related transmembrane protein, conserved region (In
A_46_P200559	1.86278	1.97915	2.09981
A_46_P282748	2.90766	1.29759	1.5283
A_46_P066466	18.0029	21.3927	13.4682	0191774 Brassica napus Apical meristem Brassica napus cDNA, mRNA sequence [EV093773]	AT1G11020	RING/FYVE/PHD zinc finger superfamily protein; FUNCTIONS IN: zinc ion binding; EXPRESSED IN: 24 plant structures; EXPRESSED DURING: 15 growth stages; CONTAINS InterPro DOMAIN/s: Zinc finger, C3HC4 RING-type (InterPro:IPR018957), Zinc finger, RING-CH-type
A_46_P065106	1475.56	3427.39	3121.45	BNDH5DCT_UP_014_A04_26JAN2004_032 Brassica napus BNDH5DCT Brassica napus cDNA 5', mRNA sequence [EE461658]	AT5G19370	rhodanese-like domain-containing protein / PPIC-type PPIASE domain-containing protein; FUNCTIONS IN: isomerase activity; INVOLVED IN: biological_process unknown; LOCATED IN: chloroplast; EXPRESSED IN: 24 plant structures; EXPRESSED DURING: 13 growth stage
A_46_P378958	6.37599	1.71008	2.05446	Rep: Glutathione-S-transferase - Brassica juncea (Leaf mustard) (Indian mustard), partial (55%) [TC211655]	AT1G78380	Encodes a glutathione transferase that is a member of Tau GST gene family. Expression is induced by drought stress, oxidative stress, and high doses of auxin and cytokinin. naming convention according to Wagner et al. (2002) The expression of this gene is
A_46_P190244	2.26435	2.37147	2.49351	Rep: AT5g26280/T19G15_130 - Arabidopsis thaliana (Mouse-ear cress), partial (81%) [TC191227]
A_46_P193189	2.1302	1.92452	2.02176	Rep: AT5g66680/MSN2_7 - Arabidopsis thaliana (Mouse-ear cress), complete [TC192362]	AT5G66680	Encodes a protein ortholog of human SOT48 or yeast WBP1, an essential protein subunit of the oligosaccharyltransferase (OST) complex, which is responsible for the transfer in the ER of the N-linked glycan precursor onto Asn residues of candidate proteins.
A_46_P288543	13.5265	11.3731	10.3133	0147109 Brassica napus Etiolated seedlings (Uni-ZAP) Brassica napus cDNA, mRNA sequence [EV169115]	AT1G09310	Protein of unknown function, DUF538; INVOLVED IN: biological_process unknown; LOCATED IN: apoplast; EXPRESSED IN: 22 plant structures; EXPRESSED DURING: 14 growth stages; CONTAINS InterPro DOMAIN/s: Protein of unknown function DUF538 (InterPro:IPR007493);
A_46_P333770	1.88823	1.70218	2.49233	Rep: Stearoyl-acyl carrier protein desaturase - Arabidopsis thaliana (Mouse-ear cress), partial (26%) [TC188567]	AT3G02630	Plant stearoyl-acyl-carrier-protein desaturase family protein; FUNCTIONS IN: acyl-[acyl-carrier-protein] desaturase activity, oxidoreductase activity, transition metal ion binding; INVOLVED IN: oxidation reduction, fatty acid metabolic process, fatty acid
A_46_P370215	1.44285	1.6859	2.42569		AT3G50880	DNA glycosylase superfamily protein; FUNCTIONS IN: catalytic activity; INVOLVED IN: DNA repair, base-excision repair; LOCATED IN: chloroplast; EXPRESSED IN: 23 plant structures; EXPRESSED DURING: 13 growth stages; CONTAINS InterPro DOMAIN/s: DNA glycosyla
A_46_P033271	2.30836	2.14565	2.32462	82-E023033-021-019-D22-frev ADIS-MPIZ 021 Brassica napus cDNA clone MPIZp1022D2219Q, mRNA sequence [CX188805]	AT5G53530	Homolog of yeast retromer subunit VPS26. Part of a retromer-like protein complex involved in endosome to lysosome protein transport.
A_46_P133989	3.62693	3.89389	4.67365
A_46_P087016	2.21069	2.5785	1.78236	EX20LIB6_UP_065_G12_12MAY2004_084 Brassica napus EX20LIB6 Brassica napus cDNA 5', mRNA sequence [EE494234]	AT2G45140	Encodes a Plant VAMP-Associated protein that localizes to the ER and binds to the sitosterol-binding protein ORP3a. The WFDE motif in ORP3a appears to be important for this direct interaction. Mutation of this motif causes ORP3a to relocalize to the Golgi
A_46_P198294	2.24685	2.20096	2.19779	Rep: Chromosome chr11 scaffold_13, whole genome shotgun sequence - Vitis vinifera (Grape), partial (36%) [TC185355]	AT5G20140	SOUL heme-binding family protein; FUNCTIONS IN: binding; INVOLVED IN: biological_process unknown; LOCATED IN: chloroplast thylakoid membrane, chloroplast; EXPRESSED IN: 21 plant structures; EXPRESSED DURING: 13 growth stages; CONTAINS InterPro DOMAIN/s: P
A_46_P356255	2.05932	1.72453	1.70105	0168446 Brassica napus Late bud Brassica napus cDNA, mRNA sequence [EV165482]	AT3G55410	2-oxoglutarate dehydrogenase, E1 component; FUNCTIONS IN: oxoglutarate dehydrogenase (succinyl-transferring) activity, cobalt ion binding, zinc ion binding; INVOLVED IN: glycolysis, metabolic process; LOCATED IN: mitochondrion; EXPRESSED IN: 25 plant stru
A_46_P359890	2.4093	2.12606	2.25621	Rep: Probable disease resistance protein At1g12280 - Arabidopsis thaliana (Mouse-ear cress), partial (18%) [TC203624]	AT1G12280	LRR and NB-ARC domains-containing disease resistance protein; FUNCTIONS IN: ATP binding; INVOLVED IN: N-terminal protein myristoylation, defense response, apoptosis; LOCATED IN: endomembrane system; EXPRESSED IN: 13 plant structures; EXPRESSED DURING: 9 g
A_46_P047636	2.87247	2.14638	1.75512	53COT5_T3_011_A09_05SEP2004_079 Brassica napus 36hr germinating seed library 53COT5 Brassica napus cDNA 5', mRNA sequence [DY020871]	AT4G30620	Uncharacterised BCR, YbaB family COG0718; INVOLVED IN: biological_process unknown; LOCATED IN: chloroplast, chloroplast envelope; EXPRESSED IN: 21 plant structures; EXPRESSED DURING: 13 growth stages; CONTAINS InterPro DOMAIN/s: Uncharacterised protein fa
A_46_P231969	6.36783	6.40233	9.71919	BNSCS3CT_UP_084_D08_05MAY2007_058 Brassica napus BNSCS3CT Brassica napus cDNA 5', mRNA sequence [EV043150]	AT5G52450	MATE efflux family protein; FUNCTIONS IN: antiporter activity, drug transmembrane transporter activity, transporter activity; INVOLVED IN: response to nematode; LOCATED IN: plasma membrane, membrane; EXPRESSED IN: 24 plant structures; EXPRESSED DURING: 15
A_46_P290768	2.22218	2.30648	2.37093	0180049 Brassica napus Leaf library Brassica napus cDNA, mRNA sequence [EV099886]
A_46_P157904	3.08434	2.29018	1.56945
A_46_P094721	6.44865	3.15798	3.00679	BNQA_UP_092_H08_01JUN2005_050 Brassica napus BNQA Brassica napus cDNA 5', mRNA sequence [EE553577]
A_46_P273768	1.97061	2.35422	2.22598	Rep: Chromosome chr11 scaffold_13, whole genome shotgun sequence - Vitis vinifera (Grape), partial (82%) [TC175168]
A_46_P166164	1.56989	1.71219	2.99044		AT4G17830	Peptidase M20/M25/M40 family protein; FUNCTIONS IN: metallopeptidase activity, hydrolase activity; INVOLVED IN: proteolysis, metabolic process; EXPRESSED IN: 24 plant structures; EXPRESSED DURING: 13 growth stages; CONTAINS InterPro DOMAIN/s: Peptidase M2
A_46_P144214	2.76439	2.87581	2.55207	Rep: At3g63410 - Arabidopsis thaliana (Mouse-ear cress), partial (97%) [TC208401]	AT3G63410	Encodes a MPBQ/MSBQ methyltransferase located in the chloroplast inner envelope membrane. Mutant plants lack plastoquinone (PQ), suggesting that the APG1 protein is involved in the methylation step of PQ biosynthesis. The gene product is also involved in
A_46_P363280	5.6573	1.47443	-1.05991	Rep: Zgc:165573 protein - Danio rerio (Zebrafish) (Brachydanio rerio), partial (36%) [TC205156]	AT2G41420	proline-rich family protein; LOCATED IN: plasma membrane; EXPRESSED IN: 23 plant structures; EXPRESSED DURING: 15 growth stages; Has 12775 Blast hits to 6141 proteins in 617 species: Archae - 8; Bacteria - 1509; Metazoa - 4530; Fungi - 1572; Plants - 2511
A_46_P056656	2.21237	1.78201	1.19717	53COT2_T3_001_B11_28JUN2004_093 Brassica napus 36hr germinating seed library 53COT2 Brassica napus cDNA 5', mRNA sequence [DY024177]	AT3G49570	RESPONSE TO LOW SULFUR 3 (LSU3); BEST Arabidopsis thaliana protein match is: response to low sulfur 2 (TAIR:AT5G24660.1); Has 71 Blast hits to 71 proteins in 14 species: Archae - 0; Bacteria - 0; Metazoa - 1; Fungi - 0; Plants - 70; Viruses - 0; Other Euk
A_46_P109244	82.7763	87.6813	96.0346	0207118 Brassica napus Very early anther Brassica napus cDNA, mRNA sequence [EV141188]
A_46_P191734	1.26783	2.36934	1.33278	Rep: Uncharacterized protein At5g51545.1 - Arabidopsis thaliana (Mouse-ear cress), partial (82%) [TC173297]
A_46_P171419	3.64799	2.97284	3.13208	Rep: Chromosome chr12 scaffold_18, whole genome shotgun sequence - Vitis vinifera (Grape), partial (71%) [TC176120]	AT2G42710	Ribosomal protein L1p/L10e family; FUNCTIONS IN: structural constituent of ribosome, RNA binding; INVOLVED IN: translation, RNA processing; LOCATED IN: ribosome, intracellular, large ribosomal subunit; EXPRESSED IN: 21 plant structures; EXPRESSED DURING:
A_46_P164204	10.8308	2.99129	4.72101	BNAOV1GH_T3_097_E12_22SEPT2007_088 BNAOV1GH Brassica napus cDNA 5', mRNA sequence [GR444506]
A_46_P175439	2.02296	1.33723	2.46169	BN25.062B07F011130 BN25 Brassica napus cDNA clone BN25062B07, mRNA sequence [CD825872]
A_46_P311455	2.31522	2.56486	3.60056	CAB38838.1 - Arabidopsis thaliana (Mouse-ear cress), partial (94%) [TC172144]
A_46_P249509	5.41678	6.08502	5.01791	0150962 Brassica napus Etiolated seedlings (Uni-ZAP) Brassica napus cDNA, mRNA sequence [EV170912]	AT5G25900	Encodes a member of the CYP701A cytochrome p450 family that is involved in later steps of the gibberellin biosynthetic pathway.
A_46_P322000	5.57835	2.72064	4.28758	Rep: Probable histone chaperone ASF1A - Arabidopsis thaliana (Mouse-ear cress), partial (94%) [TC179288]	AT1G66740	Located on the SSL2 region of Arabidopsis thaliana, which is homeologous to the Brassica S locus for self incompatibility. Expressed in both vegetative and reproductive organs suggesting AtSP7 might not be involved in self incompatibility.
A_46_P264928	2.65616	2.45493	1.51305	0143940 Brassica napus Etiolated seedlings (Uni-ZAP) Brassica napus cDNA, mRNA sequence [EV167130]
A_46_P104184	1.7123	2.02874	2.16707	9RDBNGA_UP_155_G03_10MAR2006_019 Brassica napus 9RDBNGA Brassica napus cDNA 5', mRNA sequence [ES956720]
A_46_P000091	29.3878	34.8556	14.1307	55ACACPE_UP_016_A04_15DEC2004_032 Brassica napus AC Excell Brassica napus cDNA 5', mRNA sequence [EE410962]
A_46_P008776	13.5909	17.6512	29.6908	Brassica napus Sqp1;1 mRNA for squalene epoxidase (homologue) [AJ005931]	AT5G24150	squalene monooxygenase gene homolog
A_46_P230399	2.9322	1.40331	1.82747
A_46_P334085	2.36006	1.38232	1.28836	Rep: Chromosome chr6 scaffold_3, whole genome shotgun sequence - Vitis vinifera (Grape), partial (20%) [TC188788]	AT3G55980	salt-inducible zinc finger 1 (SZF1); CONTAINS InterPro DOMAIN/s: Zinc finger, CCCH-type (InterPro:IPR000571), Ankyrin repeat-containing domain (InterPro:IPR020683), Ankyrin repeat (InterPro:IPR002110); BEST Arabidopsis thaliana protein match is: zinc fing
A_46_P172759	1.59079	1.75738	2.83714	Rep: YSL transporter 1 - Thlaspi caerulescens (Alpine penny-cress) (Thlaspi calaminare), partial (59%) [TC180688]	AT1G65730	Arabidopsis thaliana metal-nicotianamine transporter YSL4
A_46_P155719	1.71649	2.0535	1.37284	Rep: T14P8.17 - Arabidopsis thaliana (Mouse-ear cress), partial (82%) [TC175601]	AT4G02360	Protein of unknown function, DUF538; FUNCTIONS IN: molecular_function unknown; INVOLVED IN: biological_process unknown; LOCATED IN: endomembrane system; EXPRESSED IN: 9 plant structures; EXPRESSED DURING: LP.04 four leaves visible, 4 anthesis, C globular
A_46_P052041	2.96691	2.95237	2.93084	0144816 Brassica napus Etiolated seedlings (Uni-ZAP) Brassica napus cDNA, mRNA sequence [EV167951]	AT1G55080	MED9; BEST Arabidopsis thaliana protein match is: unknown protein (TAIR:AT1G29580.1); Has 67203 Blast hits to 25757 proteins in 1293 species: Archae - 12; Bacteria - 4374; Metazoa - 24340; Fungi - 7940; Plants - 5927; Viruses - 273; Other Eukaryotes - 243
A_46_P149714	2.21509	2.30588	1.98343	Rep: Glutaredoxin-C1 - Arabidopsis thaliana (Mouse-ear cress), complete [TC176455]	AT5G63030	Thioredoxin superfamily protein; FUNCTIONS IN: electron carrier activity, arsenate reductase (glutaredoxin) activity, protein disulfide oxidoreductase activity; INVOLVED IN: N-terminal protein myristoylation, cell redox homeostasis; LOCATED IN: cellular_c
A_46_P233024	3.31203	3.87526	6.506	Rep: Pathogenesis-related thaumatin family protein - Brassica campestris (Field mustard), partial (94%) [TC183081]	AT1G75800	Pathogenesis-related thaumatin superfamily protein; FUNCTIONS IN: molecular_function unknown; INVOLVED IN: response to other organism; LOCATED IN: endomembrane system; EXPRESSED IN: 22 plant structures; EXPRESSED DURING: 13 growth stages; CONTAINS InterPr
A_46_P187494	1.87109	2.19959	1.84706	Rep: Uncharacterized calcium-binding protein At1g02270 - Arabidopsis thaliana (Mouse-ear cress), partial (43%) [TC193258]	AT1G02270	Calcium-binding endonuclease/exonuclease/phosphatase family; FUNCTIONS IN: catalytic activity, calcium ion binding; INVOLVED IN: response to cold; LOCATED IN: nucleus; EXPRESSED IN: 22 plant structures; EXPRESSED DURING: 13 growth stages; CONTAINS InterPr
A_46_P258164	6.55318	1.77418	1.815		AT5G54060	UDP-glucose:flavonoid 3-o-glucosyltransferase (UF3GT); FUNCTIONS IN: transferase activity, transferring glycosyl groups; INVOLVED IN: N-terminal protein myristoylation, response to sucrose stimulus; LOCATED IN: cellular_component unknown; EXPRESSED IN: 14
A_46_P060621	1.40681	1.86218	4.42474	AAF34837.1 - Arabidopsis thaliana (Mouse-ear cress), partial (67%) [TC191059]	AT3G15280	unknown protein; FUNCTIONS IN: molecular_function unknown; LOCATED IN: mitochondrion; EXPRESSED IN: 8 plant structures; EXPRESSED DURING: L mature pollen stage, 4 anthesis, petal differentiation and expansion stage; Has 36 Blast hits to 36 proteins in 15
A_46_P292383	2.11248	1.74637	1.50364		AT3G13570	encodes an SC35-like splicing factor of 30 kD that is localized to the nuclear specks. Barta et al (2010) have proposed a nomenclature for Serine/Arginine-Rich Protein Splicing Factors (SR proteins): Plant Cell. 2010, 22:2926.
A_46_P336320	37.4583	34.5226	35.8401	Rep: Chromosome chr13 scaffold_17, whole genome shotgun sequence - Vitis vinifera (Grape), partial (29%) [TC190358]	AT5G02050	Mitochondrial glycoprotein family protein; INVOLVED IN: biological_process unknown; LOCATED IN: chloroplast, mitochondrial matrix; EXPRESSED IN: 23 plant structures; EXPRESSED DURING: 13 growth stages; CONTAINS InterPro DOMAIN/s: Mitochondrial glycoprotei
A_46_P055126	4.33122	2.88053	2.30265	53COT5_T3_003_C01_28JUN2004_011 Brassica napus 36hr germinating seed library 53COT5 Brassica napus cDNA 5', mRNA sequence [DY020239]	AT5G57140	purple acid phosphatase 28 (PAP28); FUNCTIONS IN: protein serine/threonine phosphatase activity, acid phosphatase activity; LOCATED IN: endomembrane system; EXPRESSED IN: 20 plant structures; EXPRESSED DURING: 9 growth stages; CONTAINS InterPro DOMAIN/s:
A_46_P315095	1.73233	-1.35443	3.79229	Rep: Col-2-like protein - Brassica campestris (Field mustard), partial (94%) [TC172487]	AT3G02380	homologous to the flowering-time gene CONSTANS (CO) encoding zinc-finger proteins
A_46_P179209	4.92694	2.5665	2.30346
A_46_P097236	336.859	433.542	483.244	BNARO2GH_T3_029_H01_15DEC2006_001 Brassica napus BNARO2GH Brassica napus cDNA 5', mRNA sequence [ES913885]	AT5G19690	encodes an oligosaccharyl transferase involved response to high salt. Mutants are hypersensitive to high salt conditions
A_46_P158279	3.34086	-2.34977	-3.31319	CAA17570.1 - Arabidopsis thaliana (Mouse-ear cress), partial (78%) [TC197880]
A_46_P304185	3.78711	-3.40146	-5.83938
A_46_P227564	2.7241	2.21792	1.76048	0168508 Brassica napus Late bud Brassica napus cDNA, mRNA sequence [EV165521]
A_46_P340205	8.51606	8.63894	7.43587
A_46_P167064	21.793	20.7455	32.0091	Rep: Uncharacterized protein At2g37760.3 - Arabidopsis thaliana (Mouse-ear cress), partial (98%) [TC169434]
A_46_P005361	5.6793	2.90023	3.0694	BNSCS5CT_UP_089_E01_29MAY2007_007 Brassica napus BNSCS5CT Brassica napus cDNA 5', mRNA sequence [EV083957]
A_46_P147899	3.00609	3.35038	3.23227	Rep: Serine-rich protein - Brassica campestris (Field mustard), partial (21%) [TC212816]
A_46_P094316	1.60128	1.53392	3.24739		AT1G20950	Phosphofructokinase family protein; FUNCTIONS IN: diphosphate-fructose-6-phosphate 1-phosphotransferase activity; INVOLVED IN: response to fructose stimulus, response to sucrose stimulus, photosynthesis, response to glucose stimulus; LOCATED IN: pyrophosp
A_46_P224879	3.00574	2.91079	2.50987	Rep: 60S ribosomal protein L41 - Arabidopsis thaliana (Mouse-ear cress), complete [TC204601]	AT3G11120	Ribosomal protein L41 family; FUNCTIONS IN: structural constituent of ribosome; INVOLVED IN: translation; LOCATED IN: ribosome, cytosolic large ribosomal subunit; EXPRESSED IN: male gametophyte, pollen tube; EXPRESSED DURING: L mature pollen stage, M germ
A_46_P164004	2.58218	2.3445	2.79033		AT5G53400	Encodes BOBBER1 (BOB1), a non-canonical small heat shock protein required for both development and thermotolerance. BOB1 is cytoplasmic at basal temperatures but forms heat shock granules containing canonical small heat shock proteins at high temperatures
A_46_P070246	16.8692	22.3566	2.88477	BNARO4GH_T3_025_B10_24NOV2006_078 Brassica napus BNARO4GH Brassica napus cDNA 5', mRNA sequence [ES905003]
A_46_P032036	3.14949	3.14379	3.27037	BNZB_UP_125_D11_23SEP2005_089 Brassica napus BNZB Brassica napus cDNA 5', mRNA sequence [EE565761]
A_46_P035096	2.28069	1.27235	1.24603	23-E023576-021-022-M05-frev ADIS-MPIZ 021 Brassica napus cDNA clone MPIZp1022M0522Q, mRNA sequence [CX194201]
A_46_P020576	38.0153	38.26	11.7161	BNDH5DCT_UP_026_F01_28JAN2004_005 Brassica napus BNDH5DCT Brassica napus cDNA 5', mRNA sequence [EE462467]
A_46_P267473	43.8719	112.007	127.179	0119552 Brassica napus Root library Brassica napus cDNA, mRNA sequence [EV114240]
A_46_P177164	8.21377	25.4833	19.5586	AAD29063.1 - Arabidopsis thaliana (Mouse-ear cress), partial (33%) [TC183762]	AT5G50890	alpha/beta-Hydrolases superfamily protein; BEST Arabidopsis thaliana protein match is: alpha/beta-Hydrolases superfamily protein (TAIR:AT2G05260.1); Has 209 Blast hits to 209 proteins in 14 species: Archae - 0; Bacteria - 0; Metazoa - 0; Fungi - 0; Plants
A_46_P173484	2.90726	2.48279	2.37638
A_46_P105099	2.17031	2.42182	1.73097	BNZB_UP_145_G02_27SEP2005_004 Brassica napus BNZB Brassica napus cDNA 5', mRNA sequence [ES966344]
A_46_P186104	834.494	1178.92	1085.23	Rep: Uncharacterized protein At5g20920.2 - Arabidopsis thaliana (Mouse-ear cress), partial (87%) [TC187222]
A_46_P024261	11.8282	1.90617	1.73292	Brassica napus dihydroflavonol reductase (DFR) mRNA, complete cds [DQ767950]	AT5G42800	dihydroflavonol reductase. Catalyzes the conversion of dihydroquercetin to leucocyanidin in the biosynthesis of anthocyanins.
A_46_P205414	1.47425	1.6337	2.24588
A_46_P272573	18.7323	30.1455	61.568	Rep: 60S ribosomal protein L28-2 - Arabidopsis thaliana (Mouse-ear cress), complete [TC189186]
A_46_P239514	2.60807	2.73733	3.0353		AT4G37470	HTL belonging to the alpha/beta fold hydrolase superfamily. Mutant and over-expression studies indicates its involvement in seedling de-etiolation process.
A_46_P146774	1.86146	2.08104	2.01007	Brassica napus CBF-like protein CBF7 (CBF7) mRNA, complete cds [AF499032]	AT4G25700	Converts beta-carotene to zeaxanthin via cryptoxanthin.
A_46_P230229	2.30778	2.26059	2.16455		AT3G49000	RNA polymerase III subunit RPC82 family protein; FUNCTIONS IN: DNA-directed RNA polymerase activity, DNA binding; INVOLVED IN: transcription; LOCATED IN: endomembrane system; EXPRESSED IN: 23 plant structures; EXPRESSED DURING: 13 growth stages; CONTAINS
A_46_P377700	2.08606	2.2243	2.19459		AT3G56910	plastid-specific 50S ribosomal protein 5 (PSRP5); FUNCTIONS IN: molecular_function unknown; INVOLVED IN: biological_process unknown; LOCATED IN: thylakoid, chloroplast thylakoid membrane, chloroplast, chloroplast envelope; EXPRESSED IN: 22 plant structure
A_46_P120869	201.197	162.623	142.022	0147896 Brassica napus Etiolated seedlings (Uni-ZAP) Brassica napus cDNA, mRNA sequence [EV169444]	AT2G16660	Major facilitator superfamily protein; INVOLVED IN: response to karrikin; LOCATED IN: endomembrane system; EXPRESSED IN: 23 plant structures; EXPRESSED DURING: 13 growth stages; CONTAINS InterPro DOMAIN/s: Nodulin-like (InterPro:IPR010658), Major facilita
A_46_P255709	3.4738	2.40799	3.33794	Rep: CRANTZ hydroxyproline-rich glycoprotein - Manihot esculenta (Cassava) (Manioc), partial (54%) [TC214016]	AT2G43150	Proline-rich extensin-like family protein; FUNCTIONS IN: structural constituent of cell wall; INVOLVED IN: plant-type cell wall organization; LOCATED IN: endomembrane system; EXPRESSED IN: 16 plant structures; EXPRESSED DURING: 12 growth stages; CONTAINS
A_46_P244779	2.34222	1.82435	2.51839	Rep: 60S ribosomal protein L13a-4 - Arabidopsis thaliana (Mouse-ear cress), complete [TC195592]
A_46_P092411	2.22158	2.64344	2.04933	BNQA_UP_010_H01_18SEP2003_001 Brassica napus BNQA Brassica napus cDNA 5', mRNA sequence [EE549112]	AT3G58780	One of two genes (SHP1 and SHP2) that are required for fruit dehiscence. The two genes control dehiscence zone differentiation and promote the lignification of adjacent cells.
A_46_P265243	1.18047	2.17077	1.67597	Rep: transcription regulator NOT2/NOT3/NOT5 family protein - Arabidopsis thaliana, partial (52%) [TC184527]	AT5G18230	transcription regulator NOT2/NOT3/NOT5 family protein; FUNCTIONS IN: transcription regulator activity; INVOLVED IN: negative regulation of transcription, regulation of transcription; LOCATED IN: nucleus; EXPRESSED IN: 24 plant structures; EXPRESSED DURING
A_46_P148314	358.777	451.229	471.231	Rep: At4g18590 - Arabidopsis thaliana (Mouse-ear cress), complete [TC185306]	AT4G18590	Nucleic acid-binding, OB-fold-like protein; CONTAINS InterPro DOMAIN/s: Replication factor A protein 3 (InterPro:IPR013970), Nucleic acid-binding, OB-fold-like (InterPro:IPR016027); BEST Arabidopsis thaliana protein match is: Nucleic acid-binding, OB-fold
A_46_P072231	1.90373	2.39806	1.54702	BNYS4DCT_UP_036_B02_22MAR2005_014 Brassica napus seeds BNYS4DCT Brassica napus cDNA 5', mRNA sequence [EE478159]	AT3G60490	encodes a member of the DREB subfamily A-4 of ERF/AP2 transcription factor family. The protein contains one AP2 domain. There are 17 members in this subfamily including TINY.
A_46_P091481	2.31162	1.96864	1.79869	BNSCS3CT_UP_213_E05_13MAY2007_039 Brassica napus BNSCS3CT Brassica napus cDNA 5', mRNA sequence [EV053726]	AT3G56750	unknown protein; BEST Arabidopsis thaliana protein match is: unknown protein (TAIR:AT2G41150.2); Has 128 Blast hits to 128 proteins in 16 species: Archae - 0; Bacteria - 0; Metazoa - 0; Fungi - 0; Plants - 117; Viruses - 0; Other Eukaryotes - 11 (source:
A_46_P146354	1.58622	1.75215	2.08877	0190220 Brassica napus Apical meristem Brassica napus cDNA, mRNA sequence [EV092768]	AT3G15580	Encodes APG8, a component of autophagy conjugation pathway. Delivered to the lumens of vacuole under nitrogen-starvation condition.
A_46_P254264	3.95319	3.62856	3.69166	Rep: F-box/LRR-repeat protein At3g58930 - Arabidopsis thaliana (Mouse-ear cress), partial (56%) [TC191145]	AT3G58900	F-box/RNI-like superfamily protein; INVOLVED IN: biological_process unknown; LOCATED IN: endomembrane system; CONTAINS InterPro DOMAIN/s: F-box domain, cyclin-like (InterPro:IPR001810), FBD-like (InterPro:IPR006566), F-box domain, Skp2-like (InterPro:IPR0
A_46_P338295	12.3778	18.796	28.9046	Rep: Uncharacterized protein At4g19160.2 - Arabidopsis thaliana (Mouse-ear cress), partial (70%) [TC191689]
A_46_P141259	104.177	87.6964	89.8103	Rep: Arabidopsis thaliana genomic DNA, chromosome 3, P1 clone: MQC3 - Arabidopsis thaliana (Mouse-ear cress), complete [TC176824]	AT3G12260	LYR family of Fe/S cluster biogenesis protein; FUNCTIONS IN: catalytic activity; LOCATED IN: mitochondrion, respiratory chain complex I, membrane; EXPRESSED IN: 23 plant structures; EXPRESSED DURING: 14 growth stages; Has 252 Blast hits to 252 proteins in
A_46_P151314	48.4495	135.192	163.108	Rep: AT5g61020/maf19_20 - Arabidopsis thaliana (Mouse-ear cress), partial (45%) [TC184732]
A_46_P375860	8.8667	10.7057	9.28955	Rep: Plastid lipid-associated protein 3, chloroplast precursor - Brassica campestris (Field mustard), partial (29%) [TC198211]	AT2G35490	Plastid-lipid associated protein PAP / fibrillin family protein; FUNCTIONS IN: structural molecule activity; INVOLVED IN: biological_process unknown; LOCATED IN: thylakoid, chloroplast thylakoid membrane, chloroplast, plastoglobule; EXPRESSED IN: 24 plant
A_46_P244514	1.69475	2.03808	1.48097
A_46_P162304	28.7665	12.2354	31.9425
A_46_P200029	11.6179	4.07453	4.45757	Rep: Chromosome undetermined scaffold_51, whole genome shotgun sequence - Vitis vinifera (Grape), partial (35%) [TC201634]	AT5G51430	Encodes a protein that is homologous to Cog7, a subunit of the conserved oligomeric Golgi (COG) complex, which is required for the normal morphology and function of the Golgi apparatus. It is likely to be involved in transport or retention of Golgi-locali
A_46_P299890	1.49568	2.01596	2.46398	Rep: Delta-9 desaturase-like 1 protein - Arabidopsis thaliana (Mouse-ear cress), partial (78%) [TC212904]	AT1G06090	Fatty acid desaturase family protein; FUNCTIONS IN: oxidoreductase activity, oxidoreductase activity, acting on paired donors, with oxidation of a pair of donors resulting in the reduction of molecular oxygen to two molecules of water; INVOLVED IN: oxidat
A_46_P204744	5.01522	4.82367	5.29408
A_46_P011486	1.31771	1.5874	2.01582	BNBS6DCT_UP_003_F02_11APR2005_006 Brassica napus seeds BNBS6DCT Brassica napus cDNA 5', mRNA sequence [EE456191]
A_46_P329675	2.08482	3.36086	2.99601		AT2G23880	transposable element gene; non-LTR retrotransposon family (LINE), has a 4.4e-41 P-value blast match to GB:NP_038605 L1 repeat, Tf subfamily, member 30 (LINE-element) (Mus musculus)
A_46_P247089	2.41458	3.92405	2.58653	Rep: Aspartic protease-like - Solanum tuberosum (Potato), partial (49%) [TC192191]
A_46_P378383	2.29635	-1.29345	-1.15913	Rep: Nudix hydrolase 7 - Arabidopsis thaliana (Mouse-ear cress), partial (96%) [TC211402]
A_46_P351625	3.09118	4.10691	4.95864
A_46_P285668	3.01283	1.216	1.11779	Rep: Predicted protein - Physcomitrella patens subsp. patens, partial (17%) [TC185797]	AT3G14735	U6-1; snRNA; gi|16516|emb|X52527.1|ATSNU61 Arabidopsis thaliana U6-1 snRNA gene
A_46_P250494	2.16446	-1.85822	-2.45139		AT2G31880	Encodes a putative leucine rich repeat transmembrane protein that is expressed in response to Pseudomonas syringae. Expression of SRRLK may be required for silencing via lsiRNAs. Regulates cell death and innate immunity.
A_46_P091856	3.41892	3.66764	3.01913	9RDBNGA_UP_073_A02_03APR2005_016 Brassica napus - 9RDBNGA Brassica napus cDNA 5', mRNA sequence [EE545778]	AT4G33580	beta carbonic anhydrase 5 (BCA5); FUNCTIONS IN: carbonate dehydratase activity, zinc ion binding; INVOLVED IN: carbon utilization; LOCATED IN: chloroplast; EXPRESSED IN: 25 plant structures; EXPRESSED DURING: 13 growth stages; CONTAINS InterPro DOMAIN/s:
A_46_P235019	1.07385	1.94822	4.11028
A_46_P202524	3.43779	7.22898	5.1565	Rep: Mutants block sporulation after engulfment; RBL02828 precursor - Bacillus coagulans 36D1, partial (5%) [TC210142]
A_46_P073541	4.38419	3.6185	3.01787	BNSCS3CT_UP_085_F08_05MAY2007_054 Brassica napus BNSCS3CT Brassica napus cDNA 5', mRNA sequence [EV043257]	AT3G59280	mutant exhibited resistance to growth on media containing thaxtomin due to a difference in the rate of uptake of the toxin.We proposed that TXR1 is a component of, or regulator of, a dispensable transport mechanism.
A_46_P187474	2.59394	3.00363	6.22189		AT4G27080	Encodes a protein disulfide isomerase-like (PDIL) protein, a member of a multigene family within the thioredoxin (TRX) superfamily. Unlike several other PDI family members, transcript levels for this gene are not up-regulated in response to three differen
A_46_P049976	2.09851	2.64555	2.2476	Brassica napus armadillo [DQ078748]	AT3G03440	ARM repeat superfamily protein; FUNCTIONS IN: binding; INVOLVED IN: biological_process unknown; LOCATED IN: chloroplast; EXPRESSED IN: 18 plant structures; EXPRESSED DURING: 13 growth stages; CONTAINS InterPro DOMAIN/s: Armadillo-like helical (InterPro:IP
A_46_P260668	2.36457	2.1395	2.28191	Rep: At2g18730/MSF3.11 - Arabidopsis thaliana (Mouse-ear cress), partial (98%) [TC168333]	AT2G18730	diacylglycerol kinase 3 (DGK3); FUNCTIONS IN: diacylglycerol kinase activity; INVOLVED IN: activation of protein kinase C activity by G-protein coupled receptor protein signaling pathway; LOCATED IN: plasma membrane, membrane; EXPRESSED IN: 24 plant struc
A_46_P184269	2.28324	-1.8045	-1.79623	Rep: At2g31880/F20M17.8 - Arabidopsis thaliana (Mouse-ear cress), partial (39%) [TC214189]	AT2G31880	Encodes a putative leucine rich repeat transmembrane protein that is expressed in response to Pseudomonas syringae. Expression of SRRLK may be required for silencing via lsiRNAs. Regulates cell death and innate immunity.
A_46_P279038	2.59671	1.91229	1.83784	Rep: Isoform 2 of Q56XG6 - Arabidopsis thaliana (Mouse-ear cress), partial (92%) [TC182196]	AT5G11170	DEAD/DEAH box RNA helicase family protein ; FUNCTIONS IN: helicase activity, ATP-dependent helicase activity, nucleic acid binding, ATP binding; INVOLVED IN: response to cadmium ion; LOCATED IN: nucleolus; EXPRESSED IN: guard cell, root, cultured cell; CO
A_46_P262493	1.15845	1.32192	3.19053	Rep: Squamosa promoter-binding-like protein 3 - Arabidopsis thaliana (Mouse-ear cress), partial (73%) [TC181660]	AT2G33810	Encodes a member of the SPL (squamosa-promoter binding protein-like)gene family, a novel gene family encoding DNA binding proteins and putative transcription factors. Contains the SBP-box, which encodes the SBP-domain, required and sufficient for interac
A_46_P256739	1.52095	2.0185	1.87846
A_46_P239974	2.15131	2.72748	2.00257	Brassica napus phenylalanine ammonia-lyase (PAL1-1) mRNA, complete cds [DQ341308]	AT2G37040	Encodes PAL1, a phenylalanine ammonia-lyase. Arabidopsis has four PALs: AT2G37040 (PAL1), AT3G53260 (PAL2), AT5G04230 (PAL3) and AT3G10340 (PAL4).
A_46_P274588	2.80385	1.98349	1.88299		AT5G43950	Plant protein of unknown function (DUF946); CONTAINS InterPro DOMAIN/s: Protein of unknown function DUF946 (InterPro:IPR009291); BEST Arabidopsis thaliana protein match is: Plant protein of unknown function (DUF946) (TAIR:AT1G04090.1); Has 1807 Blast hits
A_46_P207689	2.49076	1.31816	1.26603		AT1G80530	Major facilitator superfamily protein; FUNCTIONS IN: molecular_function unknown; INVOLVED IN: response to karrikin; LOCATED IN: nucleus; EXPRESSED IN: 23 plant structures; EXPRESSED DURING: 13 growth stages; CONTAINS InterPro DOMAIN/s: Nodulin-like (Inter
A_46_P331495	1.48274	2.08395	2.08963	Rep: AT3g50440/T20E23_40 - Arabidopsis thaliana (Mouse-ear cress), complete [TC172693]	AT3G50440	Encodes a protein shown to have methyl jasmonate esterase activity in vitro. This protein does not act on methyl IAA, MeSA, MeGA4, or MEGA9 in vitro.
A_46_P080046	2.33263	1.94085	2.14945	0209910 Brassica napus Very early anther Brassica napus cDNA, mRNA sequence [EV143977]	AT1G32340	Encodes a protein whose sequence is similar to tobacco hairpin-induced gene (HIN1) and Arabidopsis non-race specific disease resistance gene (NDR1). Expression is not detected under normal conditions and in response to cucumber mosaic virus or spermine.
A_46_P041766	9.33383	14.046	2.7866	BNDH2DCT_UP_021_G08_18JUN2004_052 Brassica napus seeds BNDH2DCT Brassica napus cDNA 5', mRNA sequence [DW998655]
A_46_P347445	2.11698	2.15462	2.55187	Rep: Tyrosine decarboxylase 1 - Arabidopsis thaliana (Mouse-ear cress), partial (38%) [TC197240]	AT2G20340	Pyridoxal phosphate (PLP)-dependent transferases superfamily protein; FUNCTIONS IN: pyridoxal phosphate binding, carboxy-lyase activity, catalytic activity, tyrosine decarboxylase activity; INVOLVED IN: response to wounding, cellular amino acid metabolic
A_46_P307940	1.91317	2.63962	2.15575	Rep: Serine carboxypeptidase-like 20 precursor - Arabidopsis thaliana (Mouse-ear cress), partial (74%) [TC163375]	AT4G12910	serine carboxypeptidase-like 20 (scpl20); FUNCTIONS IN: serine-type carboxypeptidase activity; INVOLVED IN: proteolysis; LOCATED IN: vacuole; EXPRESSED IN: 23 plant structures; EXPRESSED DURING: 13 growth stages; CONTAINS InterPro DOMAIN/s: Peptidase S10,
A_46_P276613	2.01938	1.62699	1.58485		AT3G10260	Reticulon family protein; CONTAINS InterPro DOMAIN/s: Reticulon (InterPro:IPR003388); BEST Arabidopsis thaliana protein match is: Reticulon family protein (TAIR:AT3G61560.1); Has 1060 Blast hits to 1060 proteins in 78 species: Archae - 0; Bacteria - 0; Me
A_46_P067036	4.15445	3.84485	3.66844	BNAOV1GH_T3_032_E02_12JULY2007_008 BNAOV1GH Brassica napus cDNA 5', mRNA sequence [GR442483]	AT5G13480	Encodes a protein with similarity to yeast Pfs2p, an mRNA processing factor. Involved in regulation of flowering time; affects FCA mRNA processing. Homozygous mutants are late flowering, null alleles are embryo lethal.
A_46_P369175	1.93565	2.21359	1.90937	Rep: Probable plastid-lipid-associated protein 4, chloroplast precursor - Arabidopsis thaliana (Mouse-ear cress), partial (45%) [TC207661]	AT3G26070	Plastid-lipid associated protein PAP / fibrillin family protein; FUNCTIONS IN: structural molecule activity; INVOLVED IN: biological_process unknown; LOCATED IN: chloroplast thylakoid membrane, chloroplast, plastoglobule; CONTAINS InterPro DOMAIN/s: Plast
A_46_P384038	1.68762	2.08852	1.94908	Rep: Phytochrome A - Arabidopsis thaliana (Mouse-ear cress), partial (15%) [TC213864]
A_46_P156684	1.33459	1.82747	2.64741	Rep: Homeobox-leucine zipper protein ATHB-7 - Arabidopsis thaliana (Mouse-ear cress), partial (87%) [TC167192]
A_46_P288383	2.87489	3.43859	3.86527	BNSCS4CT_UP_061_B01_18MAY2007_013 Brassica napus BNSCS4CT Brassica napus cDNA 5', mRNA sequence [EV062951]	AT5G14105	unknown protein; Has 30201 Blast hits to 17322 proteins in 780 species: Archae - 12; Bacteria - 1396; Metazoa - 17338; Fungi - 3422; Plants - 5037; Viruses - 0; Other Eukaryotes - 2996 (source: NCBI BLink).
A_46_P366475	5.8159	3.21382	5.44273
A_46_P246329	2.05579	1.27416	1.3187		AT1G55850	encodes a protein similar to cellulose synthase
A_46_P257474	2.23005	2.13817	1.94209	Rep: Lipase-like protein - Arabidopsis thaliana (Mouse-ear cress), partial (56%) [TC175976]	AT3G48460	GDSL-like Lipase/Acylhydrolase superfamily protein; FUNCTIONS IN: hydrolase activity, acting on ester bonds, carboxylesterase activity; INVOLVED IN: glycerol biosynthetic process, lipid metabolic process; LOCATED IN: endomembrane system; EXPRESSED IN: 22
A_46_P329735	22.4154	21.2782	26.7236	Rep: Uncharacterized protein At5g19100.1 - Arabidopsis thaliana (Mouse-ear cress), partial (23%) [TC185606]	AT5G19100	Eukaryotic aspartyl protease family protein; FUNCTIONS IN: aspartic-type endopeptidase activity; INVOLVED IN: proteolysis; LOCATED IN: endomembrane system; EXPRESSED IN: root; CONTAINS InterPro DOMAIN/s: Peptidase aspartic (InterPro:IPR021109), Peptidase
A_46_P255219	3.87791	3.16089	2.38242		AT5G12360	unknown protein; BEST Arabidopsis thaliana protein match is: unknown protein (TAIR:AT3G14190.1); Has 30201 Blast hits to 17322 proteins in 780 species: Archae - 12; Bacteria - 1396; Metazoa - 17338; Fungi - 3422; Plants - 5037; Viruses - 0; Other Eukaryot
A_46_P347065	81.4871	108.641	153.179	Rep: Arginine/serine-rich protein - Arabidopsis thaliana (Mouse-ear cress), partial (94%) [TC197029]	AT1G16610	Encodes SR45, a member of the highly conserved family of serine/arginine-rich (SR) proteins, which play key roles in pre-mRNA splicing and other aspects of RNA metabolism. SR45 is a spliceosome protein, interacts with SR33 and the U1-70K protein of the U1
A_46_P186129	2.38751	2.52566	2.65393	Rep: At4g26980 - Arabidopsis thaliana (Mouse-ear cress), partial (93%) [TC169239]	AT4G26980	RNI-like superfamily protein; Has 687 Blast hits to 557 proteins in 86 species: Archae - 0; Bacteria - 0; Metazoa - 376; Fungi - 15; Plants - 236; Viruses - 0; Other Eukaryotes - 60 (source: NCBI BLink).
A_46_P274443	4.42318	4.15948	6.49394	Rep: UVB-resistance protein UVR8 - Brassica campestris (Field mustard), partial (8%) [TC184265]	AT1G19880	Regulator of chromosome condensation (RCC1) family protein; CONTAINS InterPro DOMAIN/s: Regulator of chromosome condensation/beta-lactamase-inhibitor protein II (InterPro:IPR009091), Regulator of chromosome condensation, RCC1 (InterPro:IPR000408); BEST Ar
A_46_P202669	26.8071	28.4871	23.7611	Rep: Histone H3 - Vitis vinifera (Grape), complete [TC182879]	AT1G75600	Histone superfamily protein; FUNCTIONS IN: DNA binding; INVOLVED IN: nucleosome assembly; LOCATED IN: nucleosome; EXPRESSED IN: root, flower, leaf, pollen tube; EXPRESSED DURING: seedling growth; CONTAINS InterPro DOMAIN/s: Histone H3 (InterPro:IPR000164)
A_46_P141649	2.33325	1.70282	1.41564		AT4G32940	Encodes a vacuolar processing enzyme belonging to a novel group of cysteine proteinases that is expressed in vegetative organs and is upregulated in association with various types of cell death and under stressed conditions. They are essential in processi
A_46_P234184	3.62876	1.00173	-1.84563		AT3G06320	Ribosomal protein L33 family protein; FUNCTIONS IN: structural constituent of ribosome; INVOLVED IN: translation; LOCATED IN: ribosome, intracellular, large ribosomal subunit; CONTAINS InterPro DOMAIN/s: Ribosomal protein L33 (InterPro:IPR001705); BEST Ar
A_46_P206034	1.68526	2.10831	2.50349		AT5G52990	SNARE-like superfamily protein; FUNCTIONS IN: molecular_function unknown; INVOLVED IN: transport; LOCATED IN: endomembrane system; CONTAINS InterPro DOMAIN/s: Longin-like (InterPro:IPR011012); BEST Arabidopsis thaliana protein match is: SNARE-like superfa
A_46_P172414	98.8131	93.097	106.983	Rep: Chromosome chr3 scaffold_8, whole genome shotgun sequence - Vitis vinifera (Grape), partial (37%) [TC171581]	AT4G38710	glycine-rich protein; FUNCTIONS IN: translation initiation factor activity; INVOLVED IN: biological_process unknown; LOCATED IN: cellular_component unknown; EXPRESSED IN: 23 plant structures; EXPRESSED DURING: 14 growth stages; CONTAINS InterPro DOMAIN/s:
A_46_P342605	1.16182	1.54551	2.15316	Rep: Peroxiredoxin antioxidant - Brassica napus (Rape), complete [TC194366]	AT1G48160	signal recognition particle 19 kDa protein, putative / SRP19, putative; FUNCTIONS IN: 7S RNA binding; INVOLVED IN: protein targeting, SRP-dependent cotranslational protein targeting to membrane; LOCATED IN: signal recognition particle, signal recognition
A_46_P102109	3.93459	3.92742	3.12227	BNARO6GH_T3_012_F06_07DEC2006_038 Brassica napus BNARO6GH Brassica napus cDNA 5', mRNA sequence [ES909853]
A_46_P119889	2.42004	2.14636	2.12563	0208345 Brassica napus Very early anther Brassica napus cDNA, mRNA sequence [EV142413]	AT5G43850	ARD4; FUNCTIONS IN: acireductone dioxygenase [iron(II)-requiring] activity, metal ion binding; INVOLVED IN: L-methionine salvage from methylthioadenosine, oxidation reduction; LOCATED IN: cellular_component unknown; EXPRESSED IN: 22 plant structures; EXPR
A_46_P332005	5.51845	5.56978	4.79958	Rep: Urea active transporter-like protein - Arabidopsis thaliana (Mouse-ear cress), partial (30%) [TC187188]	AT5G45380	DEGRADATION OF UREA 3 (DUR3); CONTAINS InterPro DOMAIN/s: Sodium/solute symporter, subgroup (InterPro:IPR019900), Sodium/solute symporter (InterPro:IPR001734); Has 9388 Blast hits to 9377 proteins in 1702 species: Archae - 173; Bacteria - 6389; Metazoa -
A_46_P320610	56.4149	65.3154	74.53	Rep: Peptidase S1 and S6, chymotrypsin/Hap - Acidothermus cellulolyticus (strain ATCC 43068 / 11B), partial (10%) [TC178034]
A_46_P060426	13.9916	13.1552	13.8949	BNZB_UP_209_C08_18MAR2006_060 Brassica napus BNZB Brassica napus cDNA 5', mRNA sequence [ES968735]
A_46_P261308	3.86015	3.93348	3.79119	Rep: AT3g14110/MAG2_6 - Arabidopsis thaliana (Mouse-ear cress), partial (96%) [TC174354]
A_46_P077756	2.022	2.05184	1.86583	0077331 Brassica napus Bud library Brassica napus cDNA, mRNA sequence [EV153471]	AT2G36270	Encodes a member of the basic leucine zipper transcription factor family, involved in ABA signalling during seed maturation and germination. The Arabidopsis abscisic acid (ABA)-insensitive abi5 mutants have pleiotropic defects in ABA response, including d
A_46_P040081	94.3796	6.48707	21.5942	63JKCOT5_T3_025_B05_24JAN2005_045 63JKCOT5 Brassica napus cDNA 5', mRNA sequence [DY022015]
A_46_P155129	5.6238	3.20275	2.84575	Rep: Expressed protein - Oryza sativa subsp. japonica (Rice), partial (51%) [TC174325]	AT4G21620	glycine-rich protein; FUNCTIONS IN: molecular_function unknown; INVOLVED IN: biological_process unknown; LOCATED IN: endomembrane system; EXPRESSED IN: 22 plant structures; EXPRESSED DURING: 13 growth stages; BEST Arabidopsis thaliana protein match is: un
A_46_P076296	6.49803	2.55686	1.94416	0120959 Brassica napus Root library Brassica napus cDNA, mRNA sequence [EV115647]	AT3G57330	Lesion mimic phenotype when mutation in the gene is combined with a mutation in ACA4. Lesion mimic phenotype of double knockout can be suppressed by nutritional supplements that increase anion levels (e.g. 15 mM Nitrate, Chloride, or Phosphate)
A_46_P273518	2.64931	2.65244	2.84002	Rep: T26F17.9 - Arabidopsis thaliana (Mouse-ear cress), partial (94%) [TC164244]	AT1G77610	EamA-like transporter family protein; FUNCTIONS IN: organic anion transmembrane transporter activity; LOCATED IN: membrane; EXPRESSED IN: 22 plant structures; EXPRESSED DURING: 13 growth stages; CONTAINS InterPro DOMAIN/s: Protein of unknown function DUF6
A_46_P222544	1.39925	1.66591	2.16541	Rep: F2K11.20 - Arabidopsis thaliana (Mouse-ear cress), partial (87%) [TC187079]	AT1G63420	CONTAINS InterPro DOMAIN/s: Lipopolysaccharide-modifying protein (InterPro:IPR006598), Protein of unknown function DUF821, CAP10-like (InterPro:IPR008539); BEST Arabidopsis thaliana protein match is: Arabidopsis thaliana protein of unknown function (DUF82
A_46_P357960	1.93128	2.07725	2.3206	Rep: Serine hydroxymethyltransferase - Arabidopsis thaliana (Mouse-ear cress), complete [TC202660]	AT4G32520	Encodes a serine hydroxymethyltransferase SHMT3 located in the plastid.
A_46_P355310	221.289	138.439	159.072	Rep: Cell division protein FtsH - Arabidopsis thaliana (Mouse-ear cress), partial (65%) [TC184053]	AT5G58870	encodes an FtsH protease that is localized to the chloroplast
A_46_P152764	3.73085	2.38712	3.28029	Rep: P12 - Human T-lymphotropic virus 1, partial (23%) [TC175213]
A_46_P083091	6.17424	6.27131	5.77712	BNSCS3CT_UP_038_G05_04MAY2007_035 Brassica napus BNSCS3CT Brassica napus cDNA 5', mRNA sequence [EV039518]	AT1G03680	encodes a chloroplast thioredoxin similar to prokaryotic thioredoxins.
A_46_P260953	1.79136	2.22047	2.46883		AT5G67260	Encode CYCD3;2, a CYCD3 D-type cyclin. Important for determining cell number in developing lateral organs. Mediating cytokinin effects in apical growth and development.
A_46_P253609	6.58418	5.33168	5.75534	Rep: Thioredoxin-like 1 - Arabidopsis thaliana (Mouse-ear cress), partial (85%) [TC201739]
A_46_P066256	4.02195	3.97243	4.2536	Brassica napus AtSK12-like protein mRNA, complete cds [DQ767687]
A_46_P162754	3.70435	2.31972	5.48662	0156496 Brassica napus Etiolated seedlings (Uni-ZAP) Brassica napus cDNA, mRNA sequence [EV173428]	AT3G10520	class 2 non-symbiotic hemoglobin
A_46_P289128	1.85492	1.73717	2.9404	BNARO1GH_T3_007_E07_22NOV2006_055 Brassica napus BNARO1GH Brassica napus cDNA 5', mRNA sequence [ES900144]
A_46_P239639	3.14793	1.66475	1.54636	0147086 Brassica napus Etiolated seedlings (pSPORT1) Brassica napus cDNA, mRNA sequence [EV177848]	AT2G37710	Induced in response to Salicylic acid.
A_46_P213859	5.5828	2.43617	2.5773
A_46_P207994	1.85073	2.06779	1.84182
A_46_P040306	5.94358	1.74751	1.50367	F12_02SC_1AS Brassica napus leaf infected with Sclerotinia sclerotiorum EST library Brassica napus cDNA 5', mRNA sequence [DV643281]	AT1G69920	Encodes glutathione transferase belonging to the tau class of GSTs. Naming convention according to Wagner et al. (2002).
A_46_P248544	2.61384	2.34291	1.50178	0143940 Brassica napus Etiolated seedlings (Uni-ZAP) Brassica napus cDNA, mRNA sequence [EV167130]
A_46_P271233	2.68677	1.13515	1.26055	Rep: GPT2 (glucose-6-phosphate/phosphate translocator 2); antiporter/ glucose-6-phosphate transporter - Arabidopsis thaliana, partial (57%) [TC205731]	AT1G61800	glucose6-Phosphate/phosphate transporter 2
A_46_P055006	1.20133	1.30986	2.14191	0120717 Brassica napus Root library Brassica napus cDNA, mRNA sequence [EV115405]	AT5G63220	unknown protein; CONTAINS InterPro DOMAIN/s: Uncharacterised protein family UPF0363 (InterPro:IPR007317); Has 304 Blast hits to 301 proteins in 161 species: Archae - 0; Bacteria - 0; Metazoa - 110; Fungi - 121; Plants - 35; Viruses - 0; Other Eukaryotes -
A_46_P375445	494.029	692.828	668.328	9RDBNGA_UP_148_E06_18SEP2005_040 Brassica napus 9RDBNGA Brassica napus cDNA 5', mRNA sequence [ES956157]
A_46_P159674	2.04795	1.89255	2.06209	BNZB_UP_125_D11_23SEP2005_089 Brassica napus BNZB Brassica napus cDNA 5', mRNA sequence [EE565761]	AT1G67620	Lojap-related protein; CONTAINS InterPro DOMAIN/s: Iojap-related protein (InterPro:IPR004394); Has 4659 Blast hits to 4659 proteins in 1794 species: Archae - 0; Bacteria - 3277; Metazoa - 93; Fungi - 0; Plants - 60; Viruses - 0; Other Eukaryotes - 1229 (s
A_46_P025881	1.76688	1.99811	2.06118	0163766 Brassica napus Late bud Brassica napus cDNA, mRNA sequence [EV163097]	AT4G08685	Encodes a protein, expressed in leaves, with similarity to pollen allergens.
A_46_P251704	93.3585	77.8989	65.4902	Rep: Peptidyl-prolyl cis-trans isomerase-like protein - Arabidopsis thaliana (Mouse-ear cress), partial (82%) [TC197903]	AT5G19370	rhodanese-like domain-containing protein / PPIC-type PPIASE domain-containing protein; FUNCTIONS IN: isomerase activity; INVOLVED IN: biological_process unknown; LOCATED IN: chloroplast; EXPRESSED IN: 24 plant structures; EXPRESSED DURING: 13 growth stage
A_46_P081661	1.22194	2.54513	1.82557	0142613 Brassica napus Etiolated seedlings (Uni-ZAP) Brassica napus cDNA, mRNA sequence [EV165803]
A_46_P335620	2.24326	1.49876	1.58513	0104226 Brassica napus Cold acclimation - light Brassica napus cDNA, mRNA sequence [EV203073]	AT5G06300	Putative lysine decarboxylase family protein; CONTAINS InterPro DOMAIN/s: Conserved hypothetical protein CHP00730 (InterPro:IPR005269); BEST Arabidopsis thaliana protein match is: lysine decarboxylase family protein (TAIR:AT2G37210.1); Has 5281 Blast hits
A_46_P261608	5.67031	5.18604	6.0968	BNBS2DCT_UP_031_C07_14MAR2005_059 Brassica napus seeds BNBS2DCT Brassica napus cDNA 5', mRNA sequence [EE453255]	AT2G47690	NADH-ubiquinone oxidoreductase-related; CONTAINS InterPro DOMAIN/s: NADH:ubiquinone oxidoreductase, iron-sulphur subunit 5 (InterPro:IPR019342); BEST Arabidopsis thaliana protein match is: NADH-ubiquinone oxidoreductase-related (TAIR:AT3G62790.1); Has 131
A_46_P335860	2.42377	4.11016	1.96576
A_46_P195184	2.66729	2.35717	2.42089
A_46_P349005	3.13535	2.87715	2.50852	Rep: Myo-inositol 1-phosphate synthase - Phaseolus vulgaris (Kidney bean) (French bean), partial (14%) [TC198062]	AT4G39800	** Referred to as MIPS2 in Mitsuhashi et al 2008. myo-inositol-1-phosphate synthase isoform 1.Expressed in leaf, root and silique. Immunolocalization experiments with an antibody recognizing MIPS1, MIPS2, and MIPS3 showed endosperm localization.
A_46_P279763	1.91472	1.71026	3.09022
A_46_P309085	2.12807	1.86641	1.95454	Rep: Protein kinase-like protein - Arabidopsis thaliana (Mouse-ear cress), partial (11%) [TC165462]
A_46_P163884	2.38749	2.24096	2.38816	Rep: Hydrolase, alpha/beta fold family protein, expressed - Oryza sativa subsp. japonica (Rice), complete [TC194274]	AT4G37470	HTL belonging to the alpha/beta fold hydrolase superfamily. Mutant and over-expression studies indicates its involvement in seedling de-etiolation process.
A_46_P282183	2.66768	2.13283	2.12165	EST3537 3-9 DAP Brassica Napus seed cDNA library Brassica napus cDNA clone B157B051, mRNA sequence [EL626031]
A_46_P165934	2.76178	3.29052	3.75295	Rep: Ethylene-responsive transcription factor ERF012 - Arabidopsis thaliana (Mouse-ear cress), partial (82%) [TC166113]	AT1G21910	encodes a member of the DREB subfamily A-5 of ERF/AP2 transcription factor family. The protein contains one AP2 domain. There are 15 members in this subfamily including RAP2.1, RAP2.9 and RAP2.10.
A_46_P034341	1.46497	1.71127	2.08624	51-E022786-021-015-E14-frev ADIS-MPIZ 021 Brassica napus cDNA clone MPIZp1022E1415Q, mRNA sequence [CX191673]	AT2G42570	Encodes a member of the TBL (TRICHOME BIREFRINGENCE-LIKE) gene family containing a plant-specific DUF231 (domain of unknown function) domain. TBL gene family has 46 members, two of which (TBR/AT5G06700 and TBL3/AT5G01360) have been shown to be involved in
A_46_P081541	2.07369	1.58265	1.77455	0082484 Brassica napus Bud library Brassica napus cDNA, mRNA sequence [EV158622]	AT1G13160	ARM repeat superfamily protein; FUNCTIONS IN: binding; INVOLVED IN: biological_process unknown; LOCATED IN: cellular_component unknown; EXPRESSED IN: 20 plant structures; EXPRESSED DURING: 13 growth stages; CONTAINS InterPro DOMAIN/s: Domain of unknown fu
A_46_P327025	2.14063	2.50982	3.33933	Rep: AT3g18290/MIE15_8 - Arabidopsis thaliana (Mouse-ear cress), partial (31%) [TC183540]	AT3G18290	Encodes BRUTUS (BTS), a putative E3 ligase protein with metal ion binding and DNA binding domains, which negatively regulates the response to iron deficiency.
A_46_P149424	2.07057	1.54883	1.70684
A_46_P048336	2.6513	2.21218	3.74416	40JKME7D_UP_062_C03_22JUN2006_027 Brassica napus 40JKME7D Brassica napus cDNA 5', mRNA sequence [ES982544]	AT5G19920	Transducin/WD40 repeat-like superfamily protein; CONTAINS InterPro DOMAIN/s: WD40 repeat-like-containing domain (InterPro:IPR011046), WD40 repeat 2 (InterPro:IPR019782), WD40-repeat-containing domain (InterPro:IPR017986), WD40 repeat (InterPro:IPR001680),
A_46_P033246	5.88906	8.17542	6.16089	83-E023408w-021-020-F22-frev ADIS-MPIZ 021 Brassica napus cDNA clone MPIZp1022F2220Q, mRNA sequence [CX188749]	AT5G47320	Nuclear encoded mitochondrial ribosome subunit.
A_46_P097669	1.65122	2.33209	1.76257	BNZB_UP_104_D02_15JUN2004_010 Brassica napus BNZB Brassica napus cDNA 5', mRNA sequence [EE564127]
A_46_P227399	16.408	18.4389	17.4136		AT5G18770	F-box/FBD-like domains containing protein; FUNCTIONS IN: molecular_function unknown; INVOLVED IN: biological_process unknown; LOCATED IN: chloroplast; EXPRESSED IN: 19 plant structures; EXPRESSED DURING: 10 growth stages; CONTAINS InterPro DOMAIN/s: FBD (
A_46_P313795	1095.28	914.299	876.184	Rep: Probable disease resistance protein At4g33300 - Arabidopsis thaliana (Mouse-ear cress), partial (95%) [TC186707]
A_46_P145174	2.05442	1.9146	1.82692	0121596 Brassica napus Root library Brassica napus cDNA, mRNA sequence [EV116284]
A_46_P043651	3.31939	2.43874	1.73829	BNAOV1GH_T3_095_H03_20SEPT2007_017 BNAOV1GH Brassica napus cDNA 5', mRNA sequence [GR450114]
A_46_P272053	2.22188	2.10463	1.93595	BNAR05GH_T3_001_A10_17NOV2006_080 Brassica napus BNARO5GH Brassica napus cDNA 5', mRNA sequence [ES903607]	AT1G03350	BSD domain-containing protein; FUNCTIONS IN: molecular_function unknown; INVOLVED IN: biological_process unknown; LOCATED IN: cellular_component unknown; EXPRESSED IN: 24 plant structures; EXPRESSED DURING: 15 growth stages; CONTAINS InterPro DOMAIN/s: BS
A_46_P104914	2.60487	2.03699	1.99223	Rep: Chromosome chr16 scaffold_10, whole genome shotgun sequence - Vitis vinifera (Grape), partial (31%) [TC166579]	AT3G03130	unknown protein; BEST Arabidopsis thaliana protein match is: unknown protein (TAIR:AT5G17160.1); Has 7130 Blast hits to 3690 proteins in 504 species: Archae - 22; Bacteria - 2666; Metazoa - 1654; Fungi - 721; Plants - 246; Viruses - 56; Other Eukaryotes -
A_46_P237724	3.30706	3.4718	4.71637	Rep: Chromosome chr2 scaffold_112, whole genome shotgun sequence - Vitis vinifera (Grape), partial (34%) [TC200037]	AT4G23050	PAS domain-containing protein tyrosine kinase family protein; FUNCTIONS IN: protein serine/threonine/tyrosine kinase activity, protein kinase activity, signal transducer activity; INVOLVED IN: signal transduction, protein amino acid phosphorylation, regul
A_46_P328205	3.26176	3.68665	3.51525	Rep: Chromosome chr6 scaffold_15, whole genome shotgun sequence - Vitis vinifera (Grape), partial (10%) [TC193285]	AT2G26780	ARM repeat superfamily protein; FUNCTIONS IN: binding; INVOLVED IN: biological_process unknown; LOCATED IN: membrane; EXPRESSED IN: 22 plant structures; EXPRESSED DURING: 13 growth stages; CONTAINS InterPro DOMAIN/s: Armadillo-like helical (InterPro:IPR01
A_46_P167194	1.87894	2.41047	2.04346	Rep: Chromosome chr14 scaffold_27, whole genome shotgun sequence - Vitis vinifera (Grape), partial (12%) [TC163924]	AT1G09520	LOCATED IN: chloroplast; EXPRESSED IN: 21 plant structures; EXPRESSED DURING: 12 growth stages; CONTAINS InterPro DOMAIN/s: Zinc finger, PHD-type, conserved site (InterPro:IPR019786); BEST Arabidopsis thaliana protein match is: PHD finger family protein (
A_46_P359340	2.19433	2.42638	2.30942	Rep: Chromosome chr8 scaffold_29, whole genome shotgun sequence - Vitis vinifera (Grape), partial (38%) [TC203320]
A_46_P348180	1.32484	2.64427	2.11078	Rep: Polyubiquitin - Fragaria ananassa (Strawberry), partial (71%) [TC175085]
A_46_P257619	3.48544	2.96421	1.95196	Rep: Os05g0348100 protein - Oryza sativa subsp. japonica (Rice), partial (63%) [TC192413]	AT1G70760	a subunit of the chloroplast NAD(P)H dehydrogenase complex, involved in PSI cyclic electron transport. Located on the thylakoid membrane. Mutant has impaired NAD(P)H dehydrogenase activity.
A_46_P115889	6.69614	5.32695	3.77177	0118621 Brassica napus Root library Brassica napus cDNA, mRNA sequence [EV113309]	AT1G08440	Aluminium activated malate transporter family protein; INVOLVED IN: response to aluminum ion; CONTAINS InterPro DOMAIN/s: Malate transporter, aliminium toerance (InterPro:IPR020966); BEST Arabidopsis thaliana protein match is: aluminum-activated malate tr
A_46_P095166	3.02409	3.03205	2.66643	BNQA_UP_108_G10_09NOV2005_068 Brassica napus BNQA Brassica napus cDNA 5', mRNA sequence [EE554427]	AT3G21180	one of the type IIB calcium pump isoforms. encodes an autoinhibited Ca(2+)-ATPase that contains an N-terminal calmodulin binding autoinhibitory domain.
A_46_P266228	2.41863	1.88551	2.07908	0194367 Brassica napus Apical meristem Brassica napus cDNA, mRNA sequence [EV096244]
A_46_P270269	5.38615	5.73299	7.67116	Rep: AT4g27830/T27E11_70 - Arabidopsis thaliana (Mouse-ear cress), partial (42%) [TC186308]	AT3G62750	beta glucosidase 8 (BGLU8); FUNCTIONS IN: cation binding, hydrolase activity, hydrolyzing O-glycosyl compounds, catalytic activity; INVOLVED IN: carbohydrate metabolic process; LOCATED IN: vacuole; CONTAINS InterPro DOMAIN/s: Glycoside hydrolase, family 1
A_46_P023341	1.98343	2.26771	4.68915	0190220 Brassica napus Apical meristem Brassica napus cDNA, mRNA sequence [EV092768]	AT3G15580	Encodes APG8, a component of autophagy conjugation pathway. Delivered to the lumens of vacuole under nitrogen-starvation condition.
A_46_P256744	1.96784	2.14804	2.50097	Rep: Chromosome chr10 scaffold_179, whole genome shotgun sequence - Vitis vinifera (Grape), partial (18%) [TC207803]	AT4G04350	EMBRYO DEFECTIVE 2369 (EMB2369); FUNCTIONS IN: aminoacyl-tRNA ligase activity, nucleotide binding, leucine-tRNA ligase activity, ATP binding; INVOLVED IN: tRNA aminoacylation for protein translation, embryo development ending in seed dormancy; LOCATED IN:
A_46_P233719	7.71326	7.94042	6.49157	Rep: Plastid lipid-associated protein 3, chloroplast precursor - Brassica campestris (Field mustard), partial (29%) [TC198211]	AT2G35490	Plastid-lipid associated protein PAP / fibrillin family protein; FUNCTIONS IN: structural molecule activity; INVOLVED IN: biological_process unknown; LOCATED IN: thylakoid, chloroplast thylakoid membrane, chloroplast, plastoglobule; EXPRESSED IN: 24 plant
A_46_P288478	3.02386	5.84091	3.84457	BNARO5GH_T3_011_A01_30NOV2006_015 Brassica napus BNARO5GH Brassica napus cDNA 5', mRNA sequence [ES906186]
A_46_P149574	2.17722	2.41351	2.44491	0121038 Brassica napus Root library Brassica napus cDNA, mRNA sequence [EV115726]	AT4G38460	geranylgeranyl reductase (GGR); INVOLVED IN: isoprenoid biosynthetic process; LOCATED IN: chloroplast; EXPRESSED IN: 24 plant structures; EXPRESSED DURING: 13 growth stages; CONTAINS InterPro DOMAIN/s: Polyprenyl synthetase-related (InterPro:IPR017446), T
A_46_P230114	21.352	23.1363	21.5498
A_46_P171524	2.2168	2.14519	2.42026
A_46_P195089	31.5766	32.0233	26.0747
A_46_P064431	1.35822	3.05211	1.45713	0195264 Brassica napus Apical meristem Brassica napus cDNA, mRNA sequence [EV096766]	AT3G10185	Encodes a Gibberellin-regulated GASA/GAST/Snakin family protein
A_46_P129149	7.53905	6.51313	7.26538	BN18DYSC_UP_086_B10_5MAR2008_078 BN18DYSC Brassica napus cDNA 5', mRNA sequence [FG560453]
A_46_P163009	33.8049	65.9339	52.3714	Rep: DNA ligase - Plesiocystis pacifica SIR-1, partial (3%) [TC173070]
A_46_P139664	1.38888	1.33324	4.03772
A_46_P140714	2.1188	1.88044	1.75608	Rep: 60S ribosomal protein L37-2 - Arabidopsis thaliana (Mouse-ear cress), complete [TC181906]
A_46_P050886	1.94431	1.90681	2.90988	BNARO1GH_T3_007_E07_22NOV2006_055 Brassica napus BNARO1GH Brassica napus cDNA 5', mRNA sequence [ES900144]
A_46_P322140	2.26992	2.23181	2.20884	Rep: DNA-binding family protein / histone H1/H5 family protein - Arabidopsis thaliana, partial (54%) [TC179404]
A_46_P266353	3.87721	1.76735	2.34539	0147253 Brassica napus Etiolated seedlings (Uni-ZAP) Brassica napus cDNA, mRNA sequence [EV169184]
A_46_P305229	2.49163	1.91063	3.22225
A_46_P272173	3.77253	3.6644	3.58842	Rep: BZIP protein BZO2H1 - Arabidopsis thaliana (Mouse-ear cress), partial (66%) [TC207583]	AT4G02640	Encodes a basic leucine zipper (bZIP) transcription factor AtbZIP10. AtbZIP10 shuttles between the nucleus and the cytoplasm. It binds consensus G- and C-box DNA sequences. AtbZIP10 acts antagonistically with LSD1 in both pathogen-induced hypersensitiv
A_46_P308545	3.54934	5.43772	2.93051	Rep: Chromosome undetermined scaffold_133, whole genome shotgun sequence - Vitis vinifera (Grape), partial (34%) [TC165912]	AT1G50380	Prolyl oligopeptidase family protein; FUNCTIONS IN: serine-type peptidase activity, serine-type endopeptidase activity; INVOLVED IN: proteolysis; LOCATED IN: cellular_component unknown; EXPRESSED IN: 23 plant structures; EXPRESSED DURING: 13 growth stages
A_46_P351550	2.79761	1.25152	1.04899	BNARO2GH_T3_006_G03_15DEC2006_019 Brassica napus BNARO2GH Brassica napus cDNA 5', mRNA sequence [ES909525]	AT2G40270	Protein kinase family protein; FUNCTIONS IN: protein kinase activity, kinase activity, ATP binding; INVOLVED IN: protein amino acid phosphorylation; LOCATED IN: plasma membrane; EXPRESSED IN: 22 plant structures; EXPRESSED DURING: 13 growth stages; CONTAI
A_46_P053062	3.23854	3.54249	3.04824	BNSCS2CT_UP_167_E10_27APR2007_072 Brassica napus BNSCS2CT Brassica napus cDNA 5', mRNA sequence [EV028025]	AT4G32915	FUNCTIONS IN: molecular_function unknown; INVOLVED IN: regulation of translational fidelity; LOCATED IN: chloroplast; EXPRESSED IN: 22 plant structures; EXPRESSED DURING: 13 growth stages; CONTAINS InterPro DOMAIN/s: Glu-tRNAGln amidotransferase, C subuni
A_46_P212879	62.069	84.5448	75.3771	0147856 Brassica napus Etiolated seedlings (pSPORT1) Brassica napus cDNA, mRNA sequence [EV178281]	AT3G08610	unknown protein; Has 40 Blast hits to 40 proteins in 15 species: Archae - 0; Bacteria - 0; Metazoa - 0; Fungi - 0; Plants - 40; Viruses - 0; Other Eukaryotes - 0 (source: NCBI BLink).
A_46_P079871	1.66453	2.30075	1.54367	58ACPE48_UP_013_C02_21SEP2004_012 Brassica napus seed library Brassica napus cDNA 5', mRNA sequence [EE418039]	ATMG00420	tRNA-Ser
A_46_P341565	2.31621	2.8488	2.98788	Rep: Similarity to small nuclear ribonucleoprotein - Arabidopsis thaliana (Mouse-ear cress), partial (17%) [TC190645]
A_46_P062761	1.67124	1.74523	2.55724	BNBS4DCT_UP_026_H11_26MAR2005_081 Brassica napus seeds BNBS4DCT Brassica napus cDNA 5', mRNA sequence [EE455398]
A_46_P158694	4.83502	4.86967	4.65378	Rep: GTP-binding protein At2g22870 - Arabidopsis thaliana (Mouse-ear cress), partial (34%) [TC178444]	AT2G22870	embryo defective 2001 (EMB2001); FUNCTIONS IN: GTP binding; INVOLVED IN: embryo development ending in seed dormancy; LOCATED IN: intracellular; EXPRESSED IN: 21 plant structures; EXPRESSED DURING: 13 growth stages; CONTAINS InterPro DOMAIN/s: GTP-binding
A_46_P155359	3.12157	2.17412	1.83026	Rep: Chromosome chr4 scaffold_32, whole genome shotgun sequence - Vitis vinifera (Grape), partial (52%) [TC187843]	AT5G66650	Protein of unknown function (DUF607); CONTAINS InterPro DOMAIN/s: Protein of unknown function DUF607 (InterPro:IPR006769); BEST Arabidopsis thaliana protein match is: Protein of unknown function (DUF607) (TAIR:AT2G23790.1); Has 1807 Blast hits to 1807 pro
A_46_P051486	2.47025	1.23955	1.84696	BNSCS3CT_UP_031_C08_12JAN2005_060 Brassica napus seed coat BNSCS3CT Brassica napus cDNA 5', mRNA sequence [EE467309]	AT4G10250	Columbia endomembrane-localized small heat shock protein
A_46_P253444	2.47264	-1.4294	-1.77467	Brassica napus cultivar Westar WRKY transcription factor 18 (WRKY18) mRNA, complete cds [FJ210288]
A_46_P141504	3.00898	3.27832	4.03412	Rep: Ribosomal protein S27 - Brassica campestris (Field mustard), complete [TC178098]	AT5G47930	Zinc-binding ribosomal protein family protein; FUNCTIONS IN: structural constituent of ribosome; INVOLVED IN: translation, ribosome biogenesis; LOCATED IN: cytosolic small ribosomal subunit, cytosolic ribosome, ribosome, plasma membrane; EXPRESSED IN: 23
A_46_P238644	6.52222	3.74719	2.88515	Rep: T14P8.2 - Arabidopsis thaliana (Mouse-ear cress), partial (46%) [TC176367]	AT4G02380	Encodes AtLEA5 (late embryogenesis abundant like protein). Also known as SENESCENCE-ASSOCIATED GENE 21 (SAG21). Has a role on oxidative stress tolerance. mRNA levels are elevated in response to various stresses.
A_46_P203449	2.95372	2.76956	1.79931	Rep: YSL transporter 3 - Thlaspi caerulescens (Alpine penny-cress) (Thlaspi calaminare), partial (44%) [TC208872]
A_46_P240254	2.88583	1.26155	1.28804	Rep: T22C5.18 - Arabidopsis thaliana (Mouse-ear cress), partial (62%) [TC179401]	AT1G27730	Related to Cys2/His2-type zinc-finger proteins found in higher plants. Compensated for a subset of calcineurin deficiency in yeast. Salt tolerance produced by ZAT10 appeared to be partially dependent on ENA1/PMR2, a P-type ATPase required for Li+ and Na+
A_46_P375925	8.09204	3.70853	3.04654	Rep: At3g53810 - Arabidopsis thaliana (Mouse-ear cress), partial (3%) [TC210410]	AT2G37710	Induced in response to Salicylic acid.
A_46_P030116	7.69067	4.29034	6.62064	BNAOV1GH_T3_104_D02_22SEPT2007_010 BNAOV1GH Brassica napus cDNA 5', mRNA sequence [GR445106]	AT2G34340	Protein of unknown function, DUF584; CONTAINS InterPro DOMAIN/s: Protein of unknown function DUF584 (InterPro:IPR007608); BEST Arabidopsis thaliana protein match is: Protein of unknown function, DUF584 (TAIR:AT1G29640.1); Has 334 Blast hits to 334 protein
A_46_P170159	2.09408	2.85578	3.109	Rep: Expressed protein - Arabidopsis thaliana (Mouse-ear cress), partial (82%) [TC167561]
A_46_P219224	1.93134	1.96505	2.12305		AT4G01130	GDSL-like Lipase/Acylhydrolase superfamily protein; FUNCTIONS IN: hydrolase activity, acting on ester bonds, carboxylesterase activity; INVOLVED IN: lipid metabolic process; LOCATED IN: endomembrane system; EXPRESSED IN: 18 plant structures; EXPRESSED DUR
A_46_P047711	178.009	37.1202	70.3388	BNARO5GH_T3_014_H10_30NOV2006_066 Brassica napus BNARO5GH Brassica napus cDNA 5', mRNA sequence [ES906553]	AT3G04720	Encodes a protein similar to the antifungal chitin-binding protein hevein from rubber tree latex. mRNA levels increase in response to ethylene and turnip crinkle virus infection.
A_46_P317890	2.85439	1.69188	2.19465	BNAEN3GH_UP_187_D08_26NOV2006_058 Brassica napus BNAEN3GH Brassica napus cDNA 5', mRNA sequence [EV005292]	AT1G80130	Tetratricopeptide repeat (TPR)-like superfamily protein; FUNCTIONS IN: binding; INVOLVED IN: response to oxidative stress; LOCATED IN: membrane; EXPRESSED IN: 18 plant structures; EXPRESSED DURING: 12 growth stages; CONTAINS InterPro DOMAIN/s: Tetratricop
A_46_P144204	4.80682	4.67594	4.13347	Rep: At3g63410 - Arabidopsis thaliana (Mouse-ear cress), partial (70%) [TC211185]	AT3G63410	Encodes a MPBQ/MSBQ methyltransferase located in the chloroplast inner envelope membrane. Mutant plants lack plastoquinone (PQ), suggesting that the APG1 protein is involved in the methylation step of PQ biosynthesis. The gene product is also involved in
A_46_P228649	1.08057	2.01736	1.53839	Rep: Expressed protein - Oryza sativa subsp. japonica (Rice), partial (35%) [TC177495]	AT1G12810	proline-rich family protein; BEST Arabidopsis thaliana protein match is: unknown protein (TAIR:AT2G33520.1); Has 20080 Blast hits to 10426 proteins in 614 species: Archae - 4; Bacteria - 1877; Metazoa - 7835; Fungi - 2952; Plants - 4732; Viruses - 459; Ot
A_46_P041956	3.81964	4.7697	3.26114	65JKBNMO_UP_049_G03_17JUL2006_019 Brassica napus Normalized library CoT5 65JKBNM0 Brassica napus cDNA 5', mRNA sequence [EL590848]
A_46_P271589	2.63281	2.13565	2.26148	Rep: Ornithine carbamoyltransferase, chloroplast precursor - Arabidopsis thaliana (Mouse-ear cress), partial (98%) [TC168755]	AT1G75330	ornithine carbamoyltransferase (OTC); FUNCTIONS IN: amino acid binding, ornithine carbamoyltransferase activity, carboxyl- or carbamoyltransferase activity; INVOLVED IN: cellular amino acid metabolic process; LOCATED IN: chloroplast, chloroplast stroma; E
A_46_P076736	2.65886	2.40622	1.74349	BNAR06GH_T3_001_A06_16NOV2006_048 Brassica napus BNARO6GH Brassica napus cDNA 5', mRNA sequence [ES907458]
A_46_P170804	3.6205	2.44955	3.11335	Rep: Protein phosphatase 2C - Nicotiana benthamiana, partial (5%) [TC184710]
A_46_P239354	21.0748	15.7977	12.4535
A_46_P042456	1.74105	1.73618	2.07459	BNDH4DCT_UP_001_A10_17DEC2004_080 Brassica napus seeds BNDH4DCT Brassica napus cDNA 5', mRNA sequence [DW999528]	AT1G05730	Eukaryotic protein of unknown function (DUF842); CONTAINS InterPro DOMAIN/s: Protein of unknown function DUF842, eukaryotic (InterPro:IPR008560); BEST Arabidopsis thaliana protein match is: Eukaryotic protein of unknown function (DUF842) (TAIR:AT2G31725.1
A_46_P133569	2.04798	1.74041	1.66656	0109927 Brassica napus Senescent leaves Brassica napus cDNA, mRNA sequence [EV104615]
A_46_P055976	2.67468	3.58299	2.91931	0134329 Brassica napus Root - drought Brassica napus cDNA, mRNA sequence [EV219221]
A_46_P101134	4.41404	3.33034	3.30295	BNARO2GH_T3_008_B11_15DEC2006_093 Brassica napus BNARO2GH Brassica napus cDNA 5', mRNA sequence [ES909659]	AT2G36310	Encodes a cytoplasmic nucleoside hydrolase. It has the highest levels of activity with uridine followed by xanthosine. It shows little activity with inosine and none with cytidine. Mutant analyses indicate that it plays a role in purine and pyrimidine cat
A_46_P001671	1.85565	1.55531	2.33003	BNSCS5CT_UP_128_H06_30MAY2007_034 Brassica napus BNSCS5CT Brassica napus cDNA 5', mRNA sequence [EV087008]	AT5G26800	FUNCTIONS IN: molecular_function unknown; INVOLVED IN: biological_process unknown; LOCATED IN: mitochondrion; CONTAINS InterPro DOMAIN/s: IGR protein motif (InterPro:IPR019083); BEST Arabidopsis thaliana protein match is: unknown protein (TAIR:AT3G05810.1
A_46_P334475	4.57303	3.26592	2.482	Rep: Ubiquitin-like protein SMT3 - Arabidopsis thaliana (Mouse-ear cress), partial (93%) [TC188136]	AT4G26840	Encodes a small ubiquitin-like modifier (SUMO) polypeptide that becomes covalently attached to various intracellular protein targets, much like ubiquitination, leading to post-translational modification of those targets.
A_46_P282893	4.52908	5.67368	7.75776
A_46_P328370	2.13804	1.52618	1.37691	Rep: At1g68120 - Arabidopsis thaliana (Mouse-ear cress), partial (71%) [TC184614]	AT1G68120	basic pentacysteine 3 (BPC3); CONTAINS InterPro DOMAIN/s: GAGA binding-like (InterPro:IPR010409); BEST Arabidopsis thaliana protein match is: basic pentacysteine1 (TAIR:AT2G01930.2); Has 216 Blast hits to 216 proteins in 22 species: Archae - 0; Bacteria -
A_46_P287263	8.56446	10.8331	14.6245		AT4G04950	Encodes a monothiol glutaredoxin that is a critical component involved in ROS accumulation, auxin signaling, and temperature-dependent postembryonic growth in plants.
A_46_P306175	1.94474	4.10733	4.3073		AT3G57010	Calcium-dependent phosphotriesterase superfamily protein; FUNCTIONS IN: strictosidine synthase activity; INVOLVED IN: alkaloid biosynthetic process, biosynthetic process; LOCATED IN: endoplasmic reticulum; EXPRESSED IN: 9 plant structures; EXPRESSED DURIN
A_46_P382843	18.4594	2.51156	1.52039	Rep: Probable L-asparaginase 2 precursor (EC 3.5.1.1) (L-asparagine amidohydrolase 2) [Contains: L-asparaginase 2 subunit alpha; L- asparaginase 2 subunit beta] - Arabidopsis thaliana (Mouse-ear cress), partial (37%) [TC213366]	AT3G16150	N-terminal nucleophile aminohydrolases (Ntn hydrolases) superfamily protein; CONTAINS InterPro DOMAIN/s: Peptidase T2, asparaginase 2 (InterPro:IPR000246); BEST Arabidopsis thaliana protein match is: N-terminal nucleophile aminohydrolases (Ntn hydrolases)
A_46_P039651	1.38155	2.73201	1.45918	BN18DYSC_UP_126_G12_31MAR2008_084 BN18DYSC Brassica napus cDNA 5', mRNA sequence [FG563591]	AT1G22540	Major facilitator superfamily protein; FUNCTIONS IN: transporter activity; INVOLVED IN: oligopeptide transport; LOCATED IN: membrane; EXPRESSED IN: 22 plant structures; EXPRESSED DURING: 13 growth stages; CONTAINS InterPro DOMAIN/s: PTR2 family proton/oli
A_46_P349785	1.7806	1.91762	2.59209	Rep: F2D10.12 - Arabidopsis thaliana (Mouse-ear cress), partial (48%) [TC198544]
A_46_P129854	1.82786	1.70226	2.06399	BN18DYSC_UP_036_H02_18FEB2008_002 BN18DYSC Brassica napus cDNA 5', mRNA sequence [FG556060]	AT5G15450	Encodes a chloroplast-targeted Hsp101 homologue. Functions as a molecular chaperone involved in plastid differentiation mediating internal thylakoid membrane formation and conferring thermotolerance to chloroplasts during heat stress. APG6 is constituti
A_46_P089541	1.85085	4.46401	1.58836	9RDBNGA_UP_011_G02_29SEP2003_004 Brassica napus - 9RDBNGA Brassica napus cDNA 5', mRNA sequence [EE541998]
A_46_P095216	1.33834	2.92538	3.32975	BNSCS2CT_UP_239_B07_02MAY2007_061 Brassica napus BNSCS2CT Brassica napus cDNA 5', mRNA sequence [EV033194]	AT5G47920	unknown protein; BEST Arabidopsis thaliana protein match is: unknown protein (TAIR:AT5G13880.1); Has 1807 Blast hits to 1807 proteins in 277 species: Archae - 0; Bacteria - 0; Metazoa - 736; Fungi - 347; Plants - 385; Viruses - 0; Other Eukaryotes - 339 (
A_46_P204604	2.92444	2.20518	2.10117		AT4G39800	** Referred to as MIPS2 in Mitsuhashi et al 2008. myo-inositol-1-phosphate synthase isoform 1.Expressed in leaf, root and silique. Immunolocalization experiments with an antibody recognizing MIPS1, MIPS2, and MIPS3 showed endosperm localization.
A_46_P271438	6.50136	5.55215	6.0594	Rep: AT4g39960/T5J17_130 - Arabidopsis thaliana (Mouse-ear cress), complete [TC173256]	AT4G39960	Molecular chaperone Hsp40/DnaJ family protein; FUNCTIONS IN: unfolded protein binding, heat shock protein binding, ATP binding; INVOLVED IN: protein folding, response to heat; LOCATED IN: chloroplast thylakoid membrane, chloroplast; EXPRESSED IN: 23 plant
A_46_P356235	2.38282	1.77643	1.40367	0188142 Brassica napus Apical meristem Brassica napus cDNA, mRNA sequence [EV091576]
A_46_P212694	126.013	111.814	171.409	Rep: Chromosome chr3 scaffold_157, whole genome shotgun sequence - Vitis vinifera (Grape), partial (31%) [TC189819]	AT5G64430	Octicosapeptide/Phox/Bem1p family protein; FUNCTIONS IN: molecular_function unknown; INVOLVED IN: biological_process unknown; LOCATED IN: chloroplast envelope; EXPRESSED IN: cultured cell; CONTAINS InterPro DOMAIN/s: Octicosapeptide/Phox/Bem1p (InterPro:I
A_46_P205219	1.50826	1.86142	2.0069		AT1G18880	Encodes a low-af&#64257;nity plasma membrane nitrate transporter expressed in the companion cells of root phloem.
A_46_P324380	3.10172	2.54653	3.26557	Rep: AT4g27940/T13J8_50 - Arabidopsis thaliana (Mouse-ear cress), partial (48%) [TC181349]	AT4G27940	manganese tracking factor for mitochondrial SOD2 (MTM1); FUNCTIONS IN: binding; INVOLVED IN: transport, mitochondrial transport, transmembrane transport; LOCATED IN: mitochondrial inner membrane, membrane; EXPRESSED IN: 19 plant structures; EXPRESSED DURI
A_46_P211114	3.19669	1.93888	2.18174
A_46_P070781	2.43495	2.15957	1.80601	BNAOV1GH_T3_114_A11_22SEPT2007_095 BNAOV1GH Brassica napus cDNA 5', mRNA sequence [GR446010]	AT5G66590	CAP (Cysteine-rich secretory proteins, Antigen 5, and Pathogenesis-related 1 protein) superfamily protein; FUNCTIONS IN: molecular_function unknown; INVOLVED IN: biological_process unknown; LOCATED IN: endomembrane system, extracellular region; EXPRESSED
A_46_P233249	2.12437	2.24176	3.21162		AT5G03850	Nucleic acid-binding, OB-fold-like protein; FUNCTIONS IN: structural constituent of ribosome; INVOLVED IN: translation, ribosome biogenesis; LOCATED IN: cytosolic small ribosomal subunit, ribosome, cell wall, plasma membrane; EXPRESSED IN: 24 plant struct
A_46_P281853	64.1635	73.1174	33.2283	BNAOV1GH_T3_086_H08_20SPET2007_050 BNAOV1GH Brassica napus cDNA 5', mRNA sequence [GR449312]
A_46_P239239	2.16151	2.38462	3.11513	Rep: Epithiospecifier protein - Brassica oleracea var. italica (Broccoli), complete [TC197281]	AT1G54040	Epithiospecifier protein, interacts with WRKY53. Involved in pathogen resistance and leaf senescence.
A_46_P171194	3.02698	4.02604	2.5896	Rep: UTP-glucose glucosyltransferase - Arabidopsis thaliana (Mouse-ear cress), partial (76%) [TC205240]	AT3G21800	UDP-glucosyl transferase 71B8 (UGT71B8); FUNCTIONS IN: quercetin 3-O-glucosyltransferase activity, UDP-glycosyltransferase activity, transferase activity, transferring glycosyl groups, quercetin 4'-O-glucosyltransferase activity; INVOLVED IN: metabolic pr
A_46_P182014	2.43541	1.11213	1.38874	Rep: G14587-6 protein - Arabidopsis thaliana (Mouse-ear cress), partial (38%) [TC201202]	AT4G15890	binding; FUNCTIONS IN: binding; INVOLVED IN: biological_process unknown; LOCATED IN: cellular_component unknown; EXPRESSED IN: 21 plant structures; EXPRESSED DURING: 13 growth stages; CONTAINS InterPro DOMAIN/s: Chromosome condensation protein, HCP-6-rela
A_46_P212354	22.8415	23.6467	23.6128		AT5G42980	encodes a cytosolic thioredoxin that reduces disulfide bridges of target proteins by the reversible formation of a disulfide bridge between two neighboring Cys residues present in the active site. Thioredoxins have been found to regulate a variety of biol
A_46_P377140	1.67721	2.36866	2.41209	Rep: Photosystem I reaction center subunit IV A, chloroplast precursor - Arabidopsis thaliana (Mouse-ear cress), partial (98%) [TC210877]	AT4G28750	mutant has Decreased effective quantum yield of photosystem II; Pale green plants; Reduced growth rate; Subunit E of Photosystem I
A_46_P380603	1.79904	2.128	2.33553	Rep: T6H22.14 protein - Arabidopsis thaliana (Mouse-ear cress), partial (10%) [TC212376]	AT4G17950	AT hook motif DNA-binding family protein; FUNCTIONS IN: DNA binding; INVOLVED IN: regulation of transcription, DNA-dependent; LOCATED IN: nucleus; EXPRESSED IN: 16 plant structures; EXPRESSED DURING: 11 growth stages; CONTAINS InterPro DOMAIN/s: Protein o
A_46_P348110	44.1067	53.258	62.8495	Rep: lipase class 3 family protein - Arabidopsis thaliana, partial (18%) [TC197600]	AT1G02660	alpha/beta-Hydrolases superfamily protein; FUNCTIONS IN: triglyceride lipase activity; INVOLVED IN: lipid metabolic process; LOCATED IN: cellular_component unknown; EXPRESSED IN: 24 plant structures; EXPRESSED DURING: 15 growth stages; CONTAINS InterPro D
A_46_P154769	2.00319	2.20072	1.89864	Rep: Glutaredoxin-C3 precursor - Arabidopsis thaliana (Mouse-ear cress), partial (90%) [TC190042]	AT1G77370	Glutaredoxin family protein; FUNCTIONS IN: electron carrier activity, arsenate reductase (glutaredoxin) activity, protein disulfide oxidoreductase activity; INVOLVED IN: cell redox homeostasis; LOCATED IN: endomembrane system; EXPRESSED IN: 22 plant struc
A_46_P283333	1.37508	1.72386	2.00594	Rep: 60S ribosomal protein L38 - Arabidopsis thaliana (Mouse-ear cress), complete [TC199818]	AT2G43460	Ribosomal L38e protein family; FUNCTIONS IN: structural constituent of ribosome; INVOLVED IN: translation, ribosome biogenesis; LOCATED IN: cytosolic ribosome, ribosome, cytosolic large ribosomal subunit; EXPRESSED IN: 22 plant structures; EXPRESSED DURIN
A_46_P346320	47.8214	48.8862	40.9492	AAD25584.1 - Arabidopsis thaliana (Mouse-ear cress), partial (25%) [TC196550]	AT5G58003	Encodes a polypeptide that contains FCPH and BRCT domains. RNAi suppression mutant lines were generated, which displayed a range of phenotypic abnormalities, including: incomplete to no cotyledon expansion, slow growth, epinastic leaves or small infloresc
A_46_P342900	2.63161	2.09553	2.41329	Rep: AT5g20890/F22D1_60 - Arabidopsis thaliana (Mouse-ear cress), partial (24%) [TC194511]	AT5G20890	TCP-1/cpn60 chaperonin family protein; FUNCTIONS IN: unfolded protein binding, ATP binding; INVOLVED IN: protein folding, cellular protein metabolic process; LOCATED IN: anchored to plasma membrane, cell wall; EXPRESSED IN: 24 plant structures; EXPRESSED
A_46_P234724	1.91822	2.11643	1.8774	Rep: Genomic DNA, chromosome 5, TAC clone:K1F13 - Arabidopsis thaliana (Mouse-ear cress), partial (83%) [TC203534]	AT5G66600	Protein of unknown function, DUF547; FUNCTIONS IN: molecular_function unknown; INVOLVED IN: biological_process unknown; LOCATED IN: cellular_component unknown; CONTAINS InterPro DOMAIN/s: Protein of unknown function DUF547 (InterPro:IPR006869); BEST Arabi
A_46_P156629	5.42162	2.87588	2.88917	0136926 Brassica napus Root - drought Brassica napus cDNA, mRNA sequence [EV221818]	AT4G10330	glycine-rich protein; Has 3957 Blast hits to 1040 proteins in 164 species: Archae - 18; Bacteria - 176; Metazoa - 2052; Fungi - 68; Plants - 1288; Viruses - 62; Other Eukaryotes - 293 (source: NCBI BLink).
A_46_P270863	6.18455	2.37225	2.30543	Rep: Chromosome undetermined scaffold_51, whole genome shotgun sequence - Vitis vinifera (Grape), partial (25%) [TC176925]	AT5G51430	Encodes a protein that is homologous to Cog7, a subunit of the conserved oligomeric Golgi (COG) complex, which is required for the normal morphology and function of the Golgi apparatus. It is likely to be involved in transport or retention of Golgi-locali
A_46_P145114	2.81197	2.79907	2.95238	Rep: C/VIF1 (CELL WALL / VACUOLAR INHIBITOR OF FRUCTOSIDASE 1); pectinesterase inhibitor - Arabidopsis thaliana, partial (73%) [TC171776]	AT1G47960	Plant cell wall (CWI) and vacuolar invertases (VI) play important roles in carbohydrate metabolism, stress responses and sugar signaling. This protein may inhibit their activity.
A_46_P109024	1.96535	3.20154	3.21677	0196559 Brassica napus Apical meristem Brassica napus cDNA, mRNA sequence [EV097507]	AT1G14170	RNA-binding KH domain-containing protein; FUNCTIONS IN: RNA binding, nucleic acid binding; INVOLVED IN: biological_process unknown; LOCATED IN: cellular_component unknown; CONTAINS InterPro DOMAIN/s: K Homology, type 1, subgroup (InterPro:IPR018111), K Ho
A_46_P221304	1.97964	2.2495	2.05034	Rep: Uncharacterized protein At4g13020.3 - Arabidopsis thaliana (Mouse-ear cress), partial (29%) [TC179619]
A_46_P052271	2.48459	1.92641	2.14039	69JKME5D_T3_024_C07_30MAR2005_059 69JKME5D Brassica napus cDNA 5', mRNA sequence [ES268120]	AT3G11710	lysyl-tRNA synthetase 1 (ATKRS-1); FUNCTIONS IN: ATP binding, lysine-tRNA ligase activity; INVOLVED IN: lysyl-tRNA aminoacylation, translation, tRNA aminoacylation for protein translation; LOCATED IN: cytoplasm; EXPRESSED IN: 24 plant structures; EXPRESSE
A_46_P089361	3.05171	2.51561	3.73294	0098498 Brassica napus Cold acclimation - light Brassica napus cDNA, mRNA sequence [EV197345]	AT4G20380	LSD1 monitors a superoxide-dependent signal and negatively regulates a plant cell death pathway. contains zinc-finger motifs. LSD1 negatively regulates a basal defense pathway that can act upstream or independently of both NIM1/NPR1 function and SA accumu
A_46_P164364	1.22393	1.16739	2.57447	Rep: RCc3-like protein - Arabidopsis thaliana (Mouse-ear cress), partial (86%) [TC182669]	AT4G22490	Bifunctional inhibitor/lipid-transfer protein/seed storage 2S albumin superfamily protein; FUNCTIONS IN: lipid binding; INVOLVED IN: lipid transport; LOCATED IN: endomembrane system; EXPRESSED IN: 22 plant structures; EXPRESSED DURING: 13 growth stages; C
A_46_P139539	2421.55	12506.5	10993.2		AT5G65360	Histone superfamily protein; FUNCTIONS IN: DNA binding; INVOLVED IN: nucleosome assembly; LOCATED IN: chloroplast, nucleosome; EXPRESSED IN: 23 plant structures; EXPRESSED DURING: 14 growth stages; CONTAINS InterPro DOMAIN/s: Histone H3 (InterPro:IPR00016
A_46_P071266	-1.08026	-1.19647	2.4215	0121054 Brassica napus Root library Brassica napus cDNA, mRNA sequence [EV115742]	AT4G17950	AT hook motif DNA-binding family protein; FUNCTIONS IN: DNA binding; INVOLVED IN: regulation of transcription, DNA-dependent; LOCATED IN: nucleus; EXPRESSED IN: 16 plant structures; EXPRESSED DURING: 11 growth stages; CONTAINS InterPro DOMAIN/s: Protein o
A_46_P257424	1.33197	1.58246	2.21138	Rep: Xylem cysteine proteinase 2 precursor - Arabidopsis thaliana (Mouse-ear cress), complete [TC169820]	AT1G20850	xylem cysteine peptidase 2 (XCP2); FUNCTIONS IN: cysteine-type peptidase activity, peptidase activity; INVOLVED IN: proteolysis, developmental programmed cell death; LOCATED IN: cell wall; EXPRESSED IN: 23 plant structures; EXPRESSED DURING: 13 growth sta
A_46_P104014	6.94802	9.3965	7.93474	9RDBNGA_UP_160_A11_12MAR2006_095 Brassica napus 9RDBNGA Brassica napus cDNA 5', mRNA sequence [ES957064]	AT5G08150	Encodes SOB5. Activation tagging lines accumulated higher level of cytokinin.
A_46_P384403	2.44073	2.28936	1.57545	Rep: Uncharacterized protein At1g67800.2 - Arabidopsis thaliana (Mouse-ear cress), partial (72%) [TC206584]
A_46_P350740	3.23886	3.39106	2.96265	Rep: 60S ribosomal protein L5-1 - Arabidopsis thaliana (Mouse-ear cress), partial (48%) [TC199035]
A_46_P246749	1.62905	10.811	1.69449	Rep: GRF1-interacting factor 1 - Arabidopsis thaliana (Mouse-ear cress), partial (96%) [TC194444]	AT5G28640	Encodes a protein with similarity to mammalian transcriptional coactivator that is involved in cell proliferation during leaf and flower development. Loss of function mutations have narrow, pointed leaves and narrow floral organs. AN3 interacts with membe
A_46_P269038	7.62227	10.2281	7.01903	BNDH5DCT_UP_024_B04_27JAN2004_030 Brassica napus BNDH5DCT Brassica napus cDNA 5', mRNA sequence [EE462244]	AT2G41710	Integrase-type DNA-binding superfamily protein; FUNCTIONS IN: DNA binding, sequence-specific DNA binding transcription factor activity; INVOLVED IN: regulation of transcription, DNA-dependent; LOCATED IN: nucleus; EXPRESSED IN: 22 plant structures; EXPRES
A_46_P150249	2.77935	2.07207	3.05601		AT5G57560	Encodes a cell wall-modifying enzyme, rapidly upregulated in response to environmental stimuli
A_46_P335900	226.513	267.607	268.098	Rep: DNA topoisomerase - Arabidopsis thaliana (Mouse-ear cress), partial (21%) [TC190081]	AT5G63920	Encodes topoisomerase 3alpha. Suppresses somatic crossovers. Essential for resolution of meiotic recombination intermediates.
A_46_P384668	2.27718	-1.65515	-1.80903	Rep: At2g31880/F20M17.8 - Arabidopsis thaliana (Mouse-ear cress), partial (39%) [TC214189]	AT2G31880	Encodes a putative leucine rich repeat transmembrane protein that is expressed in response to Pseudomonas syringae. Expression of SRRLK may be required for silencing via lsiRNAs. Regulates cell death and innate immunity.
A_46_P330555	9.20362	10.1952	10.6028	Rep: AT4g31450/F3L17_20 - Arabidopsis thaliana (Mouse-ear cress), partial (82%) [TC190543]	AT4G31450	RING/U-box superfamily protein; FUNCTIONS IN: zinc ion binding; EXPRESSED IN: 22 plant structures; EXPRESSED DURING: 15 growth stages; CONTAINS InterPro DOMAIN/s: Zinc finger, RING-type (InterPro:IPR001841), Zinc finger, C3HC4 RING-type (InterPro:IPR01895
A_46_P319990	2.84482	1.14737	1.35608	Rep: PHO1-like protein - Arabidopsis thaliana (Mouse-ear cress), partial (23%) [TC177383]	AT1G14040	EXS (ERD1/XPR1/SYG1) family protein; LOCATED IN: integral to membrane; EXPRESSED IN: 21 plant structures; EXPRESSED DURING: 12 growth stages; CONTAINS InterPro DOMAIN/s: SPX, N-terminal (InterPro:IPR004331), EXS, C-terminal (InterPro:IPR004342); BEST Arab
A_46_P342030	37.8217	2.08085	2.73376	Rep: Chromosome chr5 scaffold_2, whole genome shotgun sequence - Vitis vinifera (Grape), partial (71%) [TC194006]	AT5G18920	Cox19-like CHCH family protein; CONTAINS InterPro DOMAIN/s: CHCH (InterPro:IPR010625); Has 1807 Blast hits to 1807 proteins in 277 species: Archae - 0; Bacteria - 0; Metazoa - 736; Fungi - 347; Plants - 385; Viruses - 0; Other Eukaryotes - 339 (source: NC
A_46_P016556	6.3262	6.68688	8.15074	0114220 Brassica napus Senescent leaves Brassica napus cDNA, mRNA sequence [EV108908]
A_46_P151019	2.96897	1.32363	2.38732	Rep: Histone H2A - Brassica napus (Rape), partial (98%) [TC166654]	AT5G27670	Encodes HTA7, a histone H2A protein.
A_46_P199654	1.73268	2.11491	1.94616	BNAEN3GH_UP_208_B01_27NOV2006_013 Brassica napus BNAEN3GH Brassica napus cDNA 5', mRNA sequence [EV006903]	AT5G08170	EMBRYO DEFECTIVE 1873 (EMB1873); CONTAINS InterPro DOMAIN/s: Agmatine deiminase (InterPro:IPR017754), Peptidyl-arginine deiminase, Porphyromonas-type (InterPro:IPR007466); Has 2547 Blast hits to 2545 proteins in 784 species: Archae - 10; Bacteria - 1723;
A_46_P099029	1.47055	1.97324	2.64872	0153948 Brassica napus Etiolated seedlings (Uni-ZAP) Brassica napus cDNA, mRNA sequence [EV172296]	AT2G25737	Sulfite exporter TauE/SafE family protein; LOCATED IN: endomembrane system, integral to membrane; CONTAINS InterPro DOMAIN/s: Protein of unknown function DUF81 (InterPro:IPR002781); BEST Arabidopsis thaliana protein match is: Sulfite exporter TauE/SafE fa
A_46_P316135	7.13352	5.2009	3.44926	Rep: Uncharacterized protein At3g57020.2 - Arabidopsis thaliana (Mouse-ear cress), partial (56%) [TC173566]
A_46_P257244	2.98315	2.28569	1.88038		AT5G36230	ARM repeat superfamily protein; FUNCTIONS IN: binding, translation initiation factor activity; INVOLVED IN: regulation of translational initiation; LOCATED IN: membrane; EXPRESSED IN: 24 plant structures; EXPRESSED DURING: 13 growth stages; CONTAINS Inter
A_46_P103309	6.75001	2.71302	3.48471	Rep: SLL2-S9-protein - Brassica campestris (Field mustard), partial (37%) [TC186040]
A_46_P321650	3.2338	7.80836	2.3455	Rep: Probable plastid-lipid-associated protein 4, chloroplast precursor - Arabidopsis thaliana (Mouse-ear cress), partial (57%) [TC178977]	AT3G26070	Plastid-lipid associated protein PAP / fibrillin family protein; FUNCTIONS IN: structural molecule activity; INVOLVED IN: biological_process unknown; LOCATED IN: chloroplast thylakoid membrane, chloroplast, plastoglobule; CONTAINS InterPro DOMAIN/s: Plast
A_46_P156879	5.94992	4.42307	3.78683	Rep: Loricrin - Mus musculus (Mouse), partial (6%) [TC172322]
A_46_P316045	1.95973	2.20305	1.68872	Rep: AGAP000315-PA - Anopheles gambiae str. PEST, partial (31%) [TC173404]	AT5G42960	unknown protein; FUNCTIONS IN: molecular_function unknown; INVOLVED IN: biological_process unknown; LOCATED IN: mitochondrion, chloroplast, plastid, chloroplast envelope; EXPRESSED IN: 24 plant structures; EXPRESSED DURING: 13 growth stages; BEST Arabidop
A_46_P081731	1.90971	1.52844	2.22845	Rep: F12A21.26 - Arabidopsis thaliana (Mouse-ear cress), partial (36%) [TC171669]	AT1G67645	pseudogene, hypothetical protein
A_46_P039371	4.06388	1.74251	1.19591	16ACDHDS_UP_010_E10_08APR2004_072 Brassica napus 16ACDHDS Brassica napus cDNA 5', mRNA sequence [CX280517]	AT5G01750	Protein of unknown function (DUF567); FUNCTIONS IN: molecular_function unknown; INVOLVED IN: biological_process unknown; LOCATED IN: chloroplast; EXPRESSED IN: 23 plant structures; EXPRESSED DURING: 13 growth stages; CONTAINS InterPro DOMAIN/s: Protein of
A_46_P026971	3.12462	3.01015	3.69495	Rep: NAD synthetase - Nicotiana tabacum (Common tobacco), partial (61%) [TC176173]	AT1G55090	carbon-nitrogen hydrolase family protein; FUNCTIONS IN: hydrolase activity, acting on carbon-nitrogen (but not peptide) bonds, NAD+ synthase (glutamine-hydrolyzing) activity, ATP binding; INVOLVED IN: nitrogen compound metabolic process, NAD biosynthetic
A_46_P357987	2.30649	1.47769	1.79712	Rep: Similarity to GTPase activating protein - Arabidopsis thaliana (Mouse-ear cress), partial (26%) [TC202686]	AT5G54780	Ypt/Rab-GAP domain of gyp1p superfamily protein; FUNCTIONS IN: RAB GTPase activator activity; INVOLVED IN: regulation of Rab GTPase activity; LOCATED IN: mitochondrion; EXPRESSED IN: 24 plant structures; EXPRESSED DURING: 15 growth stages; CONTAINS InterP
A_46_P284368	8.07922	5.748	5.25899		AT5G52840	NADH-ubiquinone oxidoreductase-related; FUNCTIONS IN: oxidoreductase activity, acting on NADH or NADPH; INVOLVED IN: photorespiration; LOCATED IN: mitochondrion, mitochondrial membrane, chloroplast, respiratory chain complex I, membrane; EXPRESSED IN: 22
A_46_P051251	3.48638	1.35913	-1.55629		AT5G07460	ubiquitous enzyme that repairs oxidatively damaged proteins. Methionine sulfoxide reductase activity. Mutant lacking reductase activity showed increased protein oxidation, nitration and glycation of specific amino acid residues during darkness.
A_46_P322745	9.19856	28.2649	17.1107	Rep: Pyruvate kinase - Arabidopsis thaliana (Mouse-ear cress), partial (4%) [TC179986]
A_46_P220404	55.4026	27.294	35.3059		AT1G19880	Regulator of chromosome condensation (RCC1) family protein; CONTAINS InterPro DOMAIN/s: Regulator of chromosome condensation/beta-lactamase-inhibitor protein II (InterPro:IPR009091), Regulator of chromosome condensation, RCC1 (InterPro:IPR000408); BEST Ar
A_46_P006986	2.33727	3.15038	1.82036	0201007 Brassica napus Undamaged cotyledons Brassica napus cDNA, mRNA sequence [EV186800]
A_46_P357405	2.95933	2.15834	1.65805	Rep: 80A08_21 - Brassica rapa subsp. pekinensis (Chinese cabbage), partial (13%) [TC202411]	AT5G10250	Encodes a protein with an N-terminal BTB/POZ domain and a C-terminal NPH3 family domain. dot3 mutants have defects in shoot and primary root growth and produce an aberrant parallel venation pattern in juvenile leaves.
A_46_P381128	4.41357	4.0903	4.59109
A_46_P163399	1.69033	2.27559	2.19118	Rep: Phosphoglycerate dehydrogenase-like protein - Arabidopsis thaliana (Mouse-ear cress), partial (97%) [TC162362]	AT4G34200	embryo sac development arrest 9 (EDA9); FUNCTIONS IN: ATP binding; INVOLVED IN: megagametogenesis; LOCATED IN: mitochondrion, chloroplast, membrane; EXPRESSED IN: 26 plant structures; EXPRESSED DURING: 14 growth stages; CONTAINS InterPro DOMAIN/s: D-3-pho
A_46_P282303	3.92509	4.70837	4.57664	Rep: F1N21.17 - Arabidopsis thaliana (Mouse-ear cress), partial (87%) [TC173987]
A_46_P377100	2.04826	2.04954	2.09475
A_46_P357265	60.2216	63.313	42.1094	Rep: At4g21430 - Arabidopsis thaliana (Mouse-ear cress), partial (7%) [TC187588]	AT4G21430	B160; FUNCTIONS IN: sequence-specific DNA binding transcription factor activity, zinc ion binding; INVOLVED IN: biological_process unknown; LOCATED IN: cellular_component unknown; EXPRESSED IN: 22 plant structures; EXPRESSED DURING: 13 growth stages; CONT
A_46_P016536	2.06602	2.01769	1.87925	0150765 Brassica napus Etiolated seedlings (Uni-ZAP) Brassica napus cDNA, mRNA sequence [EV170816]	AT3G52850	Encodes the Vacuolar Sorting Receptor-1 (VSR-1)/Epidermal Growth Factor Receptor-like protein1(VSR-1/ATELP1). Binds vacuolar targeting signals. Involved in sorting seed storage proteins into vacuoles.
A_46_P246939	2.94829	3.11179	3.14991	BNSCS2CT_UP_189_E07_27APR2007_055 Brassica napus BNSCS2CT Brassica napus cDNA 5', mRNA sequence [EV029592]	AT5G15910	NAD(P)-binding Rossmann-fold superfamily protein; FUNCTIONS IN: coenzyme binding, binding, catalytic activity; INVOLVED IN: cellular metabolic process, metabolic process; EXPRESSED IN: 26 plant structures; EXPRESSED DURING: 15 growth stages; CONTAINS Inte
A_46_P229964	2.40059	1.78628	1.3337	Rep: Berberine bridge enzyme - Arabidopsis thaliana (Mouse-ear cress), partial (97%) [TC171005]	AT5G44390	FAD-binding Berberine family protein; FUNCTIONS IN: electron carrier activity, oxidoreductase activity, FAD binding, catalytic activity; LOCATED IN: endomembrane system; EXPRESSED IN: cotyledon, embryo, hypocotyl, root, stamen; EXPRESSED DURING: 4 anthesi
A_46_P059956	2.16049	2.89227	1.70377	0121442 Brassica napus Root library Brassica napus cDNA, mRNA sequence [EV116130]	AT3G23990	mitochondrial chaperonin HSP. assist in rapid assembly of the oligomeric protein structures in the mitochondria.
A_46_P321630	2.74384	1.7658	2.2634	Rep: Serine protease inhibitor-like protein - Oryza sativa subsp. japonica (Rice), partial (26%) [TC178955]
A_46_P072531	4.52708	-1.01375	1.72715	BNYS6DCT_UP_019_B05_05MAY2005_045 Brassica napus seeds BNYS6DCT Brassica napus cDNA 5', mRNA sequence [EE479526]	AT4G22150	Arabidopsis thaliana CDC48-interacting UBX-domain protein (PUX3)
A_46_P025996	5.31069	2.9986	2.45337	63JKCOT5_T3_035_E11_25JAN2005_087 63JKCOT5 Brassica napus cDNA 5', mRNA sequence [DY022948]	AT2G29420	Encodes glutathione transferase belonging to the tau class of GSTs. Naming convention according to Wagner et al. (2002). Induced by Salicylic acid. Independent of NPR1 for their induction by salicylic acid.
A_46_P250854	1.54827	1.72153	2.01163	Rep: Histone H3.2 - Arabidopsis thaliana (Mouse-ear cress), complete [TC171937]	AT5G10390	Histone superfamily protein; FUNCTIONS IN: DNA binding; INVOLVED IN: nucleosome assembly; LOCATED IN: chloroplast, nucleosome; EXPRESSED IN: 23 plant structures; EXPRESSED DURING: 13 growth stages; CONTAINS InterPro DOMAIN/s: Histone H3 (InterPro:IPR00016
A_46_P148464	9.38345	9.72579	9.24106	Rep: T7N9.15 - Arabidopsis thaliana (Mouse-ear cress), partial (83%) [TC184008]	AT1G27090	glycine-rich protein; BEST Arabidopsis thaliana protein match is: unknown protein (TAIR:AT3G24690.1); Has 13206 Blast hits to 7104 proteins in 677 species: Archae - 0; Bacteria - 2039; Metazoa - 5686; Fungi - 1146; Plants - 2571; Viruses - 80; Other Eukar
A_46_P031146	11.8319	13.9983	12.2304	BNARO4GH_T3_029_F01_25NOV2006_005 Brassica napus BNARO4GH Brassica napus cDNA 5', mRNA sequence [ES905408]
A_46_P169974	1.46326	3.02519	1.61933	Rep: T30E16.12, related - Medicago truncatula (Barrel medic), partial (16%) [TC186663]
A_46_P047001	23.2824	20.7791	16.8207	0142085 Brassica napus Early anther Brassica napus cDNA, mRNA sequence [EV152163]
A_46_P086056	61.9364	68.6845	81.8182	0199294 Brassica napus Undamaged cotyledons Brassica napus cDNA, mRNA sequence [EV185506]	AT1G03600	PSB27; FUNCTIONS IN: molecular_function unknown; INVOLVED IN: photosystem II repair; LOCATED IN: thylakoid, chloroplast thylakoid membrane, chloroplast thylakoid lumen, chloroplast photosystem II, chloroplast; EXPRESSED IN: 23 plant structures; EXPRESSED
A_46_P373390	1.64578	1.73159	2.46947
A_46_P237884	3.60691	5.89044	11.3757
A_46_P286383	1.47509	2.08806	2.12695	BNARO6GH_T3_019_E02_07DEC2006_008 Brassica napus BNARO6GH Brassica napus cDNA 5', mRNA sequence [ES910480]
A_46_P199489	3.86805	3.68715	4.46866	Rep: Plastidic glucose transporter 4 - Arabidopsis thaliana (Mouse-ear cress), partial (36%) [TC171789]
A_46_P153244	1.63366	1.28849	2.22997		AT1G16740	Ribosomal protein L20; FUNCTIONS IN: structural constituent of ribosome, rRNA binding; INVOLVED IN: translation, ribosome biogenesis; LOCATED IN: ribosome, intracellular; EXPRESSED IN: 22 plant structures; EXPRESSED DURING: 13 growth stages; CONTAINS Inte
A_46_P195619	2.50297	2.65353	2.01301
A_46_P069436	3.9742	4.34282	4.26138	BNSCS5CT_UP_014_B02_21JAN2005_014 Brassica napus seed coat BNSCS5CT Brassica napus cDNA 5', mRNA sequence [EE471535]
A_46_P357145	2.50498	2.38959	2.70819
A_46_P287453	1.61694	1.30767	2.03544		AT4G30960	Encodes CBL-interacting protein kinase 6 (CIPK6). Required for development and salt tolerance.
A_46_P172909	2.45945	2.27956	2.35215	Rep: Translocon Tic40-like protein - Arabidopsis thaliana (Mouse-ear cress), partial (76%) [TC194690]	AT5G16620	chloroplast protein import (Tic40)
A_46_P218769	3.33749	3.00451	2.91658	Rep: Histone H3 - Vitis vinifera (Grape), complete [TC180392]
A_46_P315465	2.21204	1.98385	2.97695	Rep: S-adenosylmethionine decarboxylase proenzyme 3 (EC 4.1.1.50) (AdoMetDC 3) (SamDC 3) [Contains: S-adenosylmethionine decarboxylase 3 alpha chain; S-adenosylmethionine decarboxylase 3 beta chain] - Brassica juncea (Leaf mustard) (Indian mustard), partial (70%) [TC162686]
A_46_P325325	4.15631	4.50893	4.16781	Rep: binding - Arabidopsis thaliana, partial (6%) [TC182177]	AT4G28080	Tetratricopeptide repeat (TPR)-like superfamily protein; FUNCTIONS IN: binding; EXPRESSED IN: 22 plant structures; EXPRESSED DURING: 13 growth stages; CONTAINS InterPro DOMAIN/s: Tetratricopeptide-like helical (InterPro:IPR011990), Tetratricopeptide repea
A_46_P085906	1.96909	2.21245	2.10784	0161453 Brassica napus Etiolated seedlings (Uni-ZAP) Brassica napus cDNA, mRNA sequence [EV176084]	AT5G66920	SKU5 similar 17 (sks17); FUNCTIONS IN: oxidoreductase activity, copper ion binding; INVOLVED IN: response to karrikin; LOCATED IN: cell wall, plant-type cell wall; EXPRESSED IN: 21 plant structures; EXPRESSED DURING: 13 growth stages; CONTAINS InterPro D
A_46_P069661	2.25186	2.90405	2.56192	0181501 Brassica napus Leaf - drought Brassica napus cDNA, mRNA sequence [EV210311]	AT5G58600	Belongs to a large family of plant-specific genes of unknown function. Involved in resistance to the powdery mildew species Erysiphe cichoracearum and Erysiphe orontii, but not to the unrelated pathogens Pseudomonas syringae or Peronospora parasitica. A
A_46_P218104	2.0815	1.77735	1.81618	Rep: Kanadaptin-like protein - Arabidopsis thaliana (Mouse-ear cress), partial (76%) [TC192904]	AT5G38840	SMAD/FHA domain-containing protein ; FUNCTIONS IN: molecular_function unknown; INVOLVED IN: biological_process unknown; LOCATED IN: membrane; EXPRESSED IN: 23 plant structures; EXPRESSED DURING: 13 growth stages; CONTAINS InterPro DOMAIN/s: SMAD/FHA domai
A_46_P219574	34.7315	3.09311	2.50387	Rep: Protein yippee-like At5g53940 - Arabidopsis thaliana (Mouse-ear cress), partial (76%) [TC193235]	AT5G53940	Yippee family putative zinc-binding protein; CONTAINS InterPro DOMAIN/s: Yippee-like protein (InterPro:IPR004910); BEST Arabidopsis thaliana protein match is: Yippee family putative zinc-binding protein (TAIR:AT2G40110.1); Has 1807 Blast hits to 1807 prot
A_46_P137934	59.4886	82.5207	53.3637	Rep: Histone H3 - Vitis vinifera (Grape), complete [TC182879]	AT1G75610	pseudogene, histone H3, identical to histone H3.2 from Medicago sativa GB:AAB36495 GI:488571, Histone H3.2, minor Lolium temulentum SP|P11105, histone H3 Tortula ruralis GI:4574208; contains Pfam profile PF00125 Core histone H2A/H2B/H3/H4; blastp match of
A_46_P310690	2.70404	2.89085	2.7141	Rep: Protein At2g01320 - Arabidopsis thaliana (Mouse-ear cress), partial (25%) [TC167605]
A_46_P229599	1.57351	2.06438	1.94765
A_46_P078931	1.80217	1.61148	2.12486	0134265 Brassica napus Root - drought Brassica napus cDNA, mRNA sequence [EV219157]
A_46_P247975	2.00257	1.89731	2.01757	Rep: Uncharacterized protein At4g28440 - Arabidopsis thaliana (Mouse-ear cress), partial (97%) [TC175932]	AT4G28440	Nucleic acid-binding, OB-fold-like protein; CONTAINS InterPro DOMAIN/s: Nucleic acid-binding, OB-fold-like (InterPro:IPR016027), Nucleic acid-binding, OB-fold (InterPro:IPR012340); BEST Arabidopsis thaliana protein match is: Nucleic acid-binding, OB-fold-
A_46_P051586	5.00519	5.40543	5.79711	BNARO2GH_T3_012_B04_15DEC2006_030 Brassica napus BNARO2GH Brassica napus cDNA 5', mRNA sequence [ES911619]	AT4G31450	RING/U-box superfamily protein; FUNCTIONS IN: zinc ion binding; EXPRESSED IN: 22 plant structures; EXPRESSED DURING: 15 growth stages; CONTAINS InterPro DOMAIN/s: Zinc finger, RING-type (InterPro:IPR001841), Zinc finger, C3HC4 RING-type (InterPro:IPR01895
A_46_P319060	9.11132	44.0973	17.0403	Rep: Pyruvate kinase - Arabidopsis thaliana (Mouse-ear cress), partial (4%) [TC176404]
A_46_P000586	356.859	666.894	644.589	BNBS2DCT_UP_031_C07_14MAR2005_059 Brassica napus seeds BNBS2DCT Brassica napus cDNA 5', mRNA sequence [EE453255]	AT2G47690	NADH-ubiquinone oxidoreductase-related; CONTAINS InterPro DOMAIN/s: NADH:ubiquinone oxidoreductase, iron-sulphur subunit 5 (InterPro:IPR019342); BEST Arabidopsis thaliana protein match is: NADH-ubiquinone oxidoreductase-related (TAIR:AT3G62790.1); Has 131
A_46_P008111	1.85373	2.13267	2.11518	0188093 Brassica napus Apical meristem Brassica napus cDNA, mRNA sequence [EV091569]
A_46_P285698	21.5167	27.7195	25.6777	Rep: Subtilisin proteinase-like - Arabidopsis thaliana (Mouse-ear cress), partial (92%) [TC165637]	AT4G21640	Subtilase family protein; FUNCTIONS IN: identical protein binding, serine-type endopeptidase activity; INVOLVED IN: proteolysis, negative regulation of catalytic activity; LOCATED IN: endomembrane system; EXPRESSED IN: synergid; CONTAINS InterPro DOMAIN/s
A_46_P002926	2.40227	2.12538	2.78961	BN18DYSC_UP_186_A06_4APR2008_048 BN18DYSC Brassica napus cDNA 5', mRNA sequence [FG568802]
A_46_P281173	64.88	158.274	126.74
A_46_P063741	1.78734	1.88391	2.12031	BNSCS3CT_UP_228_A02_14MAY2007_016 Brassica napus BNSCS3CT Brassica napus cDNA 5', mRNA sequence [EV054908]	AT1G52410	Contains a novel calcium-binding repeat sequence. Binds TSK in vitro. Localizes to small cytoplasmic vesicles in interphase cells. In cells synchronized for cell division, TSA1 and TSK relocalize to ends of spindle microtubules that are ahead of separa
A_46_P178524	2.16778	-1.46154	-1.90298	Rep: SAL2 phosphatase (3'(2'),5'-bisphosphate nucleotidase 2) (EC 3.1.3.7) (3'(2'),5'-bisphosphonucleoside 3'(2')-phosphohydrolase 2) - Arabidopsis thaliana (Mouse-ear cress), partial (98%) [TC203774]	AT5G64000	3'(2'),5'-bisphosphate nucleotidase
A_46_P086166	2.4011	2.51168	2.50987	BN18DYSC_UP_054_A05_20FEB2008_047 BN18DYSC Brassica napus cDNA 5', mRNA sequence [FG557596]
A_46_P202264	1.78109	1.90877	2.08092		AT1G09690	Translation protein SH3-like family protein; FUNCTIONS IN: structural constituent of ribosome; INVOLVED IN: translation; LOCATED IN: ribosome, cytosolic large ribosomal subunit; EXPRESSED IN: juvenile leaf, pollen tube; CONTAINS InterPro DOMAIN/s: Transla
A_46_P214989	1.91103	4.38872	2.25036	Rep: F-box/Kelch-repeat protein At2g24250 - Arabidopsis thaliana (Mouse-ear cress), partial (26%) [TC187302]
A_46_P145604	6.98091	10.2517	6.9334
A_46_P263028	2.58879	3.33995	13.4832		AT4G20410	Encodes a member of the gamma-soluble NSF attachment protein (gSNAP) gene family.
A_46_P046746	2.49782	2.52083	2.68541	65JKBNM0_T3_007_C02_16MAR2005_012 Brassica napus Normalized library CoT5 65JKBNM0 Brassica napus cDNA 5', mRNA sequence [EL587250]	AT5G11750	Ribosomal protein L19 family protein; FUNCTIONS IN: structural constituent of ribosome; INVOLVED IN: translation, ribosome biogenesis; LOCATED IN: ribosome, intracellular; CONTAINS InterPro DOMAIN/s: Ribosomal protein L19 (InterPro:IPR001857); BEST Arabid
A_46_P297498	2.34237	2.08529	2.04138	Rep: Similarity to RNA-binding protein - Arabidopsis thaliana (Mouse-ear cress), partial (87%) [TC182881]	AT5G54580	RNA-binding (RRM/RBD/RNP motifs) family protein; FUNCTIONS IN: RNA binding, nucleotide binding, nucleic acid binding; INVOLVED IN: biological_process unknown; EXPRESSED IN: 22 plant structures; EXPRESSED DURING: 13 growth stages; CONTAINS InterPro DOMAIN/
A_46_P349635	3.30811	3.26235	3.27093	Rep: Calmodulin-domain protein kinase CDPK isoform 5 - Arabidopsis thaliana (Mouse-ear cress), partial (9%) [TC198443]
A_46_P282348	1.8318	2.14105	2.07009	0189981 Brassica napus Apical meristem Brassica napus cDNA, mRNA sequence [EV092618]
A_46_P358300	3.22088	4.51148	6.50473	Rep: EIF4A protein - Brassica oleracea (Wild cabbage), partial (45%) [TC193368]	AT1G72730	DEA(D/H)-box RNA helicase family protein; FUNCTIONS IN: helicase activity, nucleic acid binding, ATP-dependent helicase activity, ATP binding; INVOLVED IN: biological_process unknown; LOCATED IN: cytosol, plasma membrane, plant-type cell wall; EXPRESSED I
A_46_P010051	-1.06171	1.5362	4.5268	BNSCS3CT_UP_032_H12_12JAN2005_082 Brassica napus seed coat BNSCS3CT Brassica napus cDNA 5', mRNA sequence [EE467446]
A_46_P276168	1.29694	1.23998	3.89734
A_46_P215485	2.0518	1.51201	1.54568	Rep: Glycerol-3-phosphate dehydrogenase [NAD+], chloroplast precursor - Arabidopsis thaliana (Mouse-ear cress), partial (38%) [TC196914]	AT5G40610	NAD-dependent glycerol-3-phosphate dehydrogenase family protein; FUNCTIONS IN: in 9 functions; INVOLVED IN: oxidation reduction, glycerol-3-phosphate metabolic process, glycerol-3-phosphate catabolic process, carbohydrate metabolic process, metabolic proc
A_46_P377940	19.7475	3.82219	4.66964	0146330 Brassica napus Etiolated seedlings (Uni-ZAP) Brassica napus cDNA, mRNA sequence [EV168729]
A_46_P084971	4.34409	4.42334	4.45647	BN18DYSC_UP_018_A07_18FEB2008_063 BN18DYSC Brassica napus cDNA 5', mRNA sequence [FG554450]	AT1G77620	P-loop containing nucleoside triphosphate hydrolases superfamily protein; FUNCTIONS IN: nucleoside-triphosphatase activity, nucleotide binding; INVOLVED IN: DNA repair, cell cycle; LOCATED IN: nucleus; CONTAINS InterPro DOMAIN/s: Checkpoint protein Rad24
A_46_P313675	2.1712	1.78256	2.56042	Rep: Similarity to RNA-binding protein - Arabidopsis thaliana (Mouse-ear cress), partial (12%) [TC171023]	AT1G13730	Nuclear transport factor 2 (NTF2) family protein with RNA binding (RRM-RBD-RNP motifs) domain; FUNCTIONS IN: RNA binding, nucleotide binding, nucleic acid binding; INVOLVED IN: transport, nucleocytoplasmic transport; LOCATED IN: intracellular; EXPRESSED I
A_46_P073306	7.90782	3.00334	4.35066		AT1G66780	MATE efflux family protein; FUNCTIONS IN: antiporter activity, drug transmembrane transporter activity, transporter activity; INVOLVED IN: drug transmembrane transport, transmembrane transport; LOCATED IN: membrane; EXPRESSED IN: 14 plant structures; EXPR
A_46_P374690	13.7692	14.7889	16.3531	Rep: F17L21.10 - Arabidopsis thaliana (Mouse-ear cress), complete [TC210002]	AT1G27310	Encodes an ortholog of yeast NTF2, a nuclear envelop transport protein that functions as the nuclear import receptor for RanGDP, an essential player in nucleocytoplasmic transport.
A_46_P134014	3.59112	4.18936	4.49394	Rep: F1N21.17 - Arabidopsis thaliana (Mouse-ear cress), partial (95%) [TC182978]
A_46_P240384	2.11015	2.47131	2.45555		AT3G07370	Encodes AtCHIP, a new class of E3 ubiquitin ligases with three tetratricopeptide repeats and a U-box domain, structurally similar to the animal CHIP proteins. Plays an important role in plant cellular metabolism under temperature stress conditions. Functi
A_46_P312735	1.77152	2.09427	2.10654	Rep: At2g21410/F3K23.17 - Arabidopsis thaliana (Mouse-ear cress), partial (33%) [TC169958]	AT2G21410	Vacuolar proton ATPase subunit VHA-a isoform 2. Localized in the tonoplast. Required for efficient nutrient storage but not for sodium accumulation.
A_46_P032481	3.53548	1.45099	1.59971	BNSCS2CT_UP_076_F11_18APR2007_085 Brassica napus BNSCS2CT Brassica napus cDNA 5', mRNA sequence [EV021381]
A_46_P179344	5.41856	5.84605	8.63191	Rep: Predicted protein - Monosiga brevicollis MX1, partial (3%) [TC177439]	AT5G43150	unknown protein; FUNCTIONS IN: molecular_function unknown; INVOLVED IN: biological_process unknown; LOCATED IN: mitochondrion; EXPRESSED IN: 22 plant structures; EXPRESSED DURING: 13 growth stages; Has 1807 Blast hits to 1807 proteins in 277 species: Arch
A_46_P363960	2.15966	1.65583	2.14321	Rep: RNA-binding protein-like - Arabidopsis thaliana (Mouse-ear cress), partial (82%) [TC205448]	AT4G26480	RNA-binding KH domain-containing protein; FUNCTIONS IN: RNA binding, nucleic acid binding; LOCATED IN: cellular_component unknown; EXPRESSED IN: 22 plant structures; EXPRESSED DURING: 13 growth stages; CONTAINS InterPro DOMAIN/s: K Homology (InterPro:IPR0
A_46_P063161	2.52856	3.21033	3.54834	BNSCS2CT_UP_138_F12_23APR2007_086 Brassica napus BNSCS2CT Brassica napus cDNA 5', mRNA sequence [EV025823]	AT2G44300	Bifunctional inhibitor/lipid-transfer protein/seed storage 2S albumin superfamily protein; FUNCTIONS IN: lipid binding; INVOLVED IN: lipid transport; LOCATED IN: plasma membrane, anchored to membrane; EXPRESSED IN: 21 plant structures; EXPRESSED DURING: 1
A_46_P252959	5.29777	-1.4377	-1.67772	Rep: Glutathione S-transferase 6 - Brassica juncea (Leaf mustard) (Indian mustard), complete [TC188776]	AT4G02520	Encodes glutathione transferase belonging to the phi class of GSTs. Naming convention according to Wagner et al. (2002). The expression of this gene is upregulated by herbicide safeners such as benoxacor and fenclorim.
A_46_P232574	26.0115	4.532	4.2799		AT5G52470	encodes a fibrillarin, a key nucleolar protein in eukaryotes which associates with box C/D small nucleolar RNAs (snoRNAs) directing 2'-O-ribose methylation of the rRNA. This gene also encodes a novel box C/D snoRNA, U60.1f in its fifth intron that accumul
A_46_P329890	1.22533	2.1127	1.98453	Rep: Nuclear transcription factor Y subunit B-2 - Arabidopsis thaliana (Mouse-ear cress), partial (94%) [TC185733]	AT5G47640	nuclear factor Y, subunit B2 (NF-YB2); FUNCTIONS IN: sequence-specific DNA binding transcription factor activity; INVOLVED IN: regulation of transcription, DNA-dependent; LOCATED IN: nucleus, intracellular; EXPRESSED IN: 23 plant structures; EXPRESSED DUR
A_46_P336960	2.86553	3.33743	2.81142	Rep: Ethylene-responsive transcription factor ERF109 - Arabidopsis thaliana (Mouse-ear cress), partial (38%) [TC190729]	AT4G34410	encodes a member of the ERF (ethylene response factor) subfamily B-3 of ERF/AP2 transcription factor family. The protein contains one AP2 domain. There are 18 members in this subfamily including ATERF-1, ATERF-2, AND ATERF-5.
A_46_P283828	3.1247	3.28471	3.68961		AT5G15220	Ribosomal protein L27 family protein; FUNCTIONS IN: structural constituent of ribosome; INVOLVED IN: translation; LOCATED IN: ribosome, intracellular; CONTAINS InterPro DOMAIN/s: Ribosomal protein L27 (InterPro:IPR001684), Ribosomal protein L27, conserved
A_46_P349585	2.13066	2.27226	2.27933	Rep: Chromosome chr3 scaffold_8, whole genome shotgun sequence - Vitis vinifera (Grape), partial (18%) [TC198411]	AT4G38890	FMN-linked oxidoreductases superfamily protein; FUNCTIONS IN: tRNA dihydrouridine synthase activity, FAD binding, catalytic activity, zinc ion binding, nucleic acid binding; INVOLVED IN: oxidation reduction, tRNA processing, metabolic process; LOCATED IN:
A_46_P320115	1.1586	1.37691	3.09872	Rep: Squamosa promoter-binding-like protein 3 - Arabidopsis thaliana (Mouse-ear cress), partial (97%) [TC177533]	AT2G33810	Encodes a member of the SPL (squamosa-promoter binding protein-like)gene family, a novel gene family encoding DNA binding proteins and putative transcription factors. Contains the SBP-box, which encodes the SBP-domain, required and sufficient for interac
A_46_P324410	34.9653	47.1705	44.7722	Rep: Pantothenate kinase - Moritella sp. PE36, partial (5%) [TC181388]	AT2G41140	Encodes CDPK-related kinase 1 (CRK1).
A_46_P177294	2.91638	2.32643	2.15287	Rep: Cation-efflux transporter - Brassica juncea (Leaf mustard) (Indian mustard), partial (68%) [TC162960]
A_46_P068721	8.07802	2.50422	2.50712	BNSCS4CT_UP_036_E06_21JAN2005_040 Brassica napus seed coat BNSCS4CT Brassica napus cDNA 5', mRNA sequence [EE470336]	AT1G67590	Remorin family protein; FUNCTIONS IN: DNA binding; INVOLVED IN: biological_process unknown; LOCATED IN: nucleus; EXPRESSED IN: 23 plant structures; EXPRESSED DURING: 12 growth stages; CONTAINS InterPro DOMAIN/s: Remorin, C-terminal (InterPro:IPR005516); B
A_46_P010576	1.75399	1.3826	2.05835	34ETGS48_UP_012_B09_11FEB2005_077 Brassica napus 34ETGS48 Brassica napus cDNA 5', mRNA sequence [EE430090]	AT3G10860	Cytochrome b-c1 complex, subunit 8 protein; FUNCTIONS IN: ubiquinol-cytochrome-c reductase activity; LOCATED IN: mitochondrion, mitochondrial respiratory chain complex III, membrane; EXPRESSED IN: 24 plant structures; EXPRESSED DURING: 15 growth stages; C
A_46_P231659	2.72784	2.70355	2.88116
A_46_P182684	2.27483	3.64373	3.71586	Rep: Phosphorylase - Arabidopsis thaliana (Mouse-ear cress), partial (22%) [TC173673]	AT3G29320	Encodes a plastidic alpha-glucan phosphorylase. In vitro, the enzyme has a preference for maltooligosaccharides, such as maltoheptaose.
A_46_P345055	2.39131	2.67887	2.70987	Rep: Rac-like GTP-binding protein ARAC10 - Arabidopsis thaliana (Mouse-ear cress), complete [TC179366]	AT5G62880	A member of ROP GTPase gene family.
A_46_P309310	4.90809	4.0965	4.67575	Rep: DNA helicase-like - Arabidopsis thaliana (Mouse-ear cress), partial (30%) [TC165722]	AT5G35970	P-loop containing nucleoside triphosphate hydrolases superfamily protein; FUNCTIONS IN: hydrolase activity, DNA binding, ATP binding; INVOLVED IN: biological_process unknown; LOCATED IN: chloroplast, chloroplast envelope; EXPRESSED IN: 22 plant structures
A_46_P221519	3.01905	2.56748	2.75159		AT1G09910	Rhamnogalacturonate lyase family protein; FUNCTIONS IN: lyase activity; INVOLVED IN: carbohydrate metabolic process; LOCATED IN: cellular_component unknown; EXPRESSED IN: 23 plant structures; EXPRESSED DURING: 13 growth stages; CONTAINS InterPro DOMAIN/s:
A_46_P281608	2.33145	1.9991	1.63801		AT4G38800	methylthioadenosine nucleosidase 1 (MTN1); FUNCTIONS IN: catalytic activity, methylthioadenosine nucleosidase activity; INVOLVED IN: L-methionine salvage from methylthioadenosine, nucleoside metabolic process; LOCATED IN: plasma membrane; EXPRESSED IN: 26
A_46_P376750	63.8093	49.8915	52.7841	Rep: Chromosome 12 SCAF14993, whole genome shotgun sequence - Tetraodon nigroviridis (Green puffer), partial (15%) [TC210729]	AT5G11980	conserved oligomeric Golgi complex component-related / COG complex component-related; CONTAINS InterPro DOMAIN/s: Conserved oligomeric Golgi complex, subunit 8 (InterPro:IPR016632), Dor1-like protein (InterPro:IPR007255); Has 30201 Blast hits to 17322 pro
A_46_P028342	69.2949	3.15622	5.56734		AT5G20180	Ribosomal protein L36; FUNCTIONS IN: structural constituent of ribosome; INVOLVED IN: translation, ribosome biogenesis; LOCATED IN: ribosome, intracellular; EXPRESSED IN: 24 plant structures; EXPRESSED DURING: 15 growth stages; CONTAINS InterPro DOMAIN/s:
A_46_P326155	1.93152	1.93863	2.74907	Rep: At1g73110/F3N23_39 - Arabidopsis thaliana (Mouse-ear cress), partial (42%) [TC182838]	AT1G73110	P-loop containing nucleoside triphosphate hydrolases superfamily protein; FUNCTIONS IN: ATPase activity, ATP binding; LOCATED IN: chloroplast thylakoid membrane, chloroplast; EXPRESSED IN: 21 plant structures; EXPRESSED DURING: 13 growth stages; CONTAINS
A_46_P042131	1.31127	1.57594	2.41867	BNSCS3CT_UP_027_C01_11JAN2005_011 Brassica napus seed coat BNSCS3CT Brassica napus cDNA 5', mRNA sequence [EE466992]	AT3G23570	alpha/beta-Hydrolases superfamily protein; FUNCTIONS IN: hydrolase activity; INVOLVED IN: response to salt stress; LOCATED IN: cellular_component unknown; EXPRESSED IN: 21 plant structures; EXPRESSED DURING: 12 growth stages; CONTAINS InterPro DOMAIN/s: D
A_46_P221209	7.07278	5.59193	4.76057	Rep: N-hydroxycinnamoyl/benzoyltransferase - Arabidopsis thaliana (Mouse-ear cress), partial (77%) [TC188359]	AT5G57840	encodes a protein whose sequence is similar to anthranilate N-hydroxycinnamoyl/benzoyltransferase from Dianthus caryophyllus (gi:2239091)
A_46_P141959	2.30158	2.67179	2.88889
A_46_P113384	2.02786	2.25312	2.35705	0179019 Brassica napus Leaf library Brassica napus cDNA, mRNA sequence [EV099284]
A_46_P227484	2.76165	3.48336	4.10586	BNSCS2CT_UP_138_F12_23APR2007_086 Brassica napus BNSCS2CT Brassica napus cDNA 5', mRNA sequence [EV025823]	AT2G44290	Bifunctional inhibitor/lipid-transfer protein/seed storage 2S albumin superfamily protein; FUNCTIONS IN: lipid binding; INVOLVED IN: lipid transport; LOCATED IN: plasma membrane, anchored to membrane; CONTAINS InterPro DOMAIN/s: Bifunctional inhibitor/pla
A_46_P292778	4.67858	3.85598	3.57642	Rep: ACI14 - Solanum lycopersicum (Tomato) (Lycopersicon esculentum), partial (96%) [TC163571]	AT3G09970	Calcineurin-like metallo-phosphoesterase superfamily protein; FUNCTIONS IN: hydrolase activity, protein serine/threonine phosphatase activity; INVOLVED IN: biological_process unknown; LOCATED IN: cellular_component unknown; EXPRESSED IN: 23 plant structur
A_46_P340265	5.77638	2.9961	3.1172	Rep: AT4g10060/T5L19_190 - Arabidopsis thaliana (Mouse-ear cress), partial (7%) [TC200411]	AT4G10060	Beta-glucosidase, GBA2 type family protein; FUNCTIONS IN: catalytic activity, glucosylceramidase activity; INVOLVED IN: glucosylceramide catabolic process, sphingolipid metabolic process; LOCATED IN: vacuole; EXPRESSED IN: 21 plant structures; EXPRESSED D
A_46_P073111	3.33863	1.71342	1.27482	BNYS8DCT_UP_016_D08_19APR2005_058 Brassica napus seeds BNYS8DCT Brassica napus cDNA 5', mRNA sequence [EE481710]
A_46_P036491	4.14227	-1.26965	-2.13942	0099725 Brassica napus Cold acclimation - light Brassica napus cDNA, mRNA sequence [EV198572]	AT3G57260	beta 1,3-glucanase
A_46_P063611	3.52579	5.33254	4.21619	BNSCS5CT_UP_027_G04_21JAN2005_020 Brassica napus seed coat BNSCS5CT Brassica napus cDNA 5', mRNA sequence [EE472680]	AT2G07050	Involved in the biosynthesis of brassinosteroids. Catalyzes the reaction from epoxysqualene to cycloartenol.
A_46_P338530	2.27324	3.12827	4.92002	Rep: Uncharacterized protein At4g20400.2 - Arabidopsis thaliana (Mouse-ear cress), partial (44%) [TC191825]
A_46_P308400	3.99713	3.19916	2.9906	Rep: LigA - Methylobacterium sp. 4-46, partial (5%) [TC164322]
A_46_P330525	2.43782	1.39882	1.0164	Rep: Probable aquaporin NIP5-1 - Arabidopsis thaliana (Mouse-ear cress), partial (37%) [TC186158]	AT4G10380	Boric acid channel. Essential for efficient boron uptake and plant development under boron limitation. Also functions in arsenite transport and tolerance. Localized preferentially in outer membrane domains of root cells.
A_46_P326555	36.6759	5.77081	17.8837	Rep: AT5g39050/MXF12_60 - Arabidopsis thaliana (Mouse-ear cress), partial (93%) [TC183223]	AT5G39050	HXXXD-type acyl-transferase family protein; FUNCTIONS IN: transferase activity, transferring acyl groups other than amino-acyl groups, transferase activity; INVOLVED IN: biological_process unknown; LOCATED IN: cellular_component unknown; EXPRESSED IN: 21
A_46_P263148	2.22644	2.05905	2.10554		AT3G11130	Clathrin, heavy chain; FUNCTIONS IN: structural molecule activity, binding; INVOLVED IN: intracellular protein transport, vesicle-mediated transport; LOCATED IN: plasma membrane, vacuole; EXPRESSED IN: male gametophyte, guard cell, cultured cell, pollen t
A_46_P366695	6.89409	2.34795	3.73067
A_46_P005106	1.9489	2.30059	2.38109	0192528 Brassica napus Apical meristem Brassica napus cDNA, mRNA sequence [EV094527]	AT4G27435	Protein of unknown function (DUF1218); FUNCTIONS IN: molecular_function unknown; INVOLVED IN: biological_process unknown; LOCATED IN: endomembrane system; EXPRESSED IN: 23 plant structures; EXPRESSED DURING: 13 growth stages; CONTAINS InterPro DOMAIN/s: P
A_46_P369670	2.2045	1.66225	1.78266	9RDBNGA_UP_080_H08_05APR2005_050 Brassica napus 9RDBNGA Brassica napus cDNA 5', mRNA sequence [ES951264]	AT5G25400	Nucleotide-sugar transporter family protein; FUNCTIONS IN: organic anion transmembrane transporter activity; LOCATED IN: endomembrane system, membrane; EXPRESSED IN: 8 plant structures; EXPRESSED DURING: M germinated pollen stage, 4 anthesis, petal differ
A_46_P005711	2.27483	1.74379	1.29197	BN25.063M04F020118 BN25 Brassica napus cDNA clone BN25063M04, mRNA sequence [CD826410]	AT2G23570	Encodes a protein with similarity to SABP2, a methyl salicylate esterase from tobacco. However, this protein is truncated and lacks one of the residues of the predicted catalytic triad, suggesting that it does not have this enzymatic activity.
A_46_P337360	2.2109	-2.34792	-1.71819	CAA19725.1 - Arabidopsis thaliana (Mouse-ear cress), partial (78%) [TC191018]	AT3G21150	Encodes a protein with a B-box domain predicted to act as a transcription factor. Expression of the BBX32 gene is affected by monochromatic red light.
A_46_P342760	2.6724	3.90373	2.219	Rep: Light regulated protein-like protein - Thellungiella halophila (Salt cress), partial (54%) [TC194449]	AT3G26740	transcripts are differentially regulated at the level of mRNA stability at different times of day controlled by the circadian clock. mRNAs are targets of the mRNA degradation pathway mediated by the downstream (DST) instability determinant.
A_46_P205799	4.44819	3.41543	2.79998	Rep: AT3g59280/F25L23_140 - Arabidopsis thaliana (Mouse-ear cress), partial (96%) [TC176147]	AT3G59280	mutant exhibited resistance to growth on media containing thaxtomin due to a difference in the rate of uptake of the toxin.We proposed that TXR1 is a component of, or regulator of, a dispensable transport mechanism.
A_46_P055401	6.95336	7.96872	7.62499	53COT5_T3_006_G01_19JUL2004_003 Brassica napus 36hr germinating seed library 53COT5 Brassica napus cDNA 5', mRNA sequence [DY020492]	AT4G08145	transposable element gene; hypothetical protein, contains Pfam domain, PF04827: Protein of unknown function (DUF635)
A_46_P232089	291.379	312.194	265.368	Rep: Nudix hydrolase 16, mitochondrial precursor - Arabidopsis thaliana (Mouse-ear cress), partial (88%) [TC174389]	AT5G13548	Pseudogene of AT3G12600; ATNUDT16 (Arabidopsis thaliana Nudix hydrolase homolog 16); hydrolase
A_46_P204319	2.533	2.29099	2.2194		AT1G47860	transposable element gene; non-LTR retrotransposon family (LINE), has a 9.0e-40 P-value blast match to GB:NP_038605 L1 repeat, Tf subfamily, member 30 (LINE-element) (Mus musculus)
A_46_P234999	2.09316	2.5731	2.34477	Rep: Arabidopsis thaliana genomic DNA, chromosome 5, TAC clone:K8K14 - Arabidopsis thaliana (Mouse-ear cress), partial (19%) [TC206372]	AT5G67410	unknown protein; BEST Arabidopsis thaliana protein match is: unknown protein (TAIR:AT2G14850.1); Has 1807 Blast hits to 1807 proteins in 277 species: Archae - 0; Bacteria - 0; Metazoa - 736; Fungi - 347; Plants - 385; Viruses - 0; Other Eukaryotes - 339 (
A_46_P250394	1651.51	3920.9	3913.71	Rep: At4g18590 - Arabidopsis thaliana (Mouse-ear cress), partial (97%) [TC213869]	AT4G18590	Nucleic acid-binding, OB-fold-like protein; CONTAINS InterPro DOMAIN/s: Replication factor A protein 3 (InterPro:IPR013970), Nucleic acid-binding, OB-fold-like (InterPro:IPR016027); BEST Arabidopsis thaliana protein match is: Nucleic acid-binding, OB-fold
A_46_P069191	1.91473	2.11851	2.19829	BN24DYSC_UP_069_B10_8FEB2008_078 BN24DYSC Brassica napus cDNA 5', mRNA sequence [FG576594]	AT2G23880	transposable element gene; non-LTR retrotransposon family (LINE), has a 4.4e-41 P-value blast match to GB:NP_038605 L1 repeat, Tf subfamily, member 30 (LINE-element) (Mus musculus)
A_46_P182729	2.77961	1.48307	2.98507	Rep: Eukaryotic initiation factor 3E subunit - Arabidopsis thaliana (Mouse-ear cress), partial (48%) [TC164726]
A_46_P155504	5.32127	1.47358	4.41427		AT3G10340	Encodes PAL4, a putative a phenylalanine ammonia-lyase. Arabidopsis has four PALs: AT2G37040 (PAL1), AT3G53260 (PAL2), AT5G04230 (PAL3) and AT3G10340 (PAL4).
A_46_P301690	2.07287	2.1317	2.0459	Rep: RANGAP2 (RAN GTPASE ACTIVATING PROTEIN 2); RAN GTPase activator - Arabidopsis thaliana, partial (67%) [TC208253]	AT5G19320	Encodes RAN GTPase activating protein 2. The protein is localized to the nuclear envelope during interphase.
A_46_P352675	2.02824	2.20919	2.11771	Rep: Serine/threonine-specific protein kinase-like - Arabidopsis thaliana (Mouse-ear cress), partial (90%) [TC200047]	AT3G55450	PBS1-like 1 (PBL1); FUNCTIONS IN: protein serine/threonine kinase activity, protein kinase activity, kinase activity, ATP binding; INVOLVED IN: protein amino acid phosphorylation; EXPRESSED IN: 22 plant structures; EXPRESSED DURING: 13 growth stages; CONT
A_46_P142934	1474.25	3517.31	3563.98	Rep: 60S ribosomal protein L35a-2 - Arabidopsis thaliana (Mouse-ear cress), complete [TC179490]
A_46_P228759	1.53835	2.61373	2.156		AT1G20610	Cyclin B2;3 (CYCB2;3); FUNCTIONS IN: cyclin-dependent protein kinase regulator activity; INVOLVED IN: regulation of cell cycle; LOCATED IN: nucleus; CONTAINS InterPro DOMAIN/s: Cyclin, C-terminal (InterPro:IPR004367), Cyclin-like (InterPro:IPR011028), Cyc
A_46_P044121	3.32475	5.87423	1.75382	0094569 Brassica napus Leaf library Brassica napus cDNA, mRNA sequence [EV102246]
A_46_P187234	439.637	659.654	764.984	Rep: Pre-mRNA-splicing factor SLU7-A - Arabidopsis thaliana (Mouse-ear cress), complete [TC182817]	AT1G65660	Encodes a CCHC zinc finger protein that may function as a step II splicing factor. In an epigenetic allele of SMP1 (in which SMP1 and SMP2 mRNA is reduced) organs are smaller and contain fewer cells.
A_46_P137614	2.38613	2.39181	2.46282	Rep: Ubiquitin-conjugating enzyme E2-17 kDa 11 - Arabidopsis thaliana (Mouse-ear cress), complete [TC167335]
A_46_P189989	13.5172	13.196	14.7279		AT5G35360	Encodes biotin carboxylase subunit (CAC2).
A_46_P090026	5.04762	4.21167	3.82793		AT4G11080	HMG (high mobility group) box protein; FUNCTIONS IN: sequence-specific DNA binding transcription factor activity; LOCATED IN: nucleus, chloroplast; EXPRESSED IN: 19 plant structures; EXPRESSED DURING: 13 growth stages; CONTAINS InterPro DOMAIN/s: High mob
A_46_P003791	2.01726	1.58092	1.47304	74-E023491-021-021-D20-frev ADIS-MPIZ 021 Brassica napus cDNA clone MPIZp1022D2021Q, mRNA sequence [CX189540]
A_46_P254639	1.38983	1.36413	4.00026	BNARO6GH_T3_007_A02_6DEC2006_016 Brassica napus BNARO6GH Brassica napus cDNA 5', mRNA sequence [ES908927]
A_46_P043606	1.95748	4.10426	2.06408	BNDH4DCT_UP_018_F11_20DEC2004_085 Brassica napus seeds BNDH4DCT Brassica napus cDNA 5', mRNA sequence [DY006384]	AT3G58780	One of two genes (SHP1 and SHP2) that are required for fruit dehiscence. The two genes control dehiscence zone differentiation and promote the lignification of adjacent cells.
A_46_P288793	2.59847	2.08889	1.5728		AT5G23300	dihydroorotate dehydrogenase, catalyses fourth step of pyrimidine biosynthesis
A_46_P365285	1.93975	2.70002	3.76046	Rep: RNA-binding protein-like - Arabidopsis thaliana (Mouse-ear cress), partial (9%) [TC186738]	AT5G19510	Translation elongation factor EF1B/ribosomal protein S6 family protein; FUNCTIONS IN: translation elongation factor activity; INVOLVED IN: translational elongation, defense response to bacterium; LOCATED IN: apoplast, eukaryotic translation elongation fa
A_46_P279783	32.4467	44.9866	55.2781		AT2G14110	Haloacid dehalogenase-like hydrolase (HAD) superfamily protein; CONTAINS InterPro DOMAIN/s: HAD-superfamily phosphatase, subfamily IIIC (InterPro:IPR010033), NLI interacting factor (InterPro:IPR004274); Has 332 Blast hits to 325 proteins in 144 species: A
A_46_P063941	2543.09	7810.23	7820.06	24RDBNH_UP_136_E09_13DEC2006_071 Brassica napus 24RDBNH Brassica napus cDNA 5', mRNA sequence [ES918740]
A_46_P186189	786.399	886.857	901.04	Rep: Uncharacterized protein At5g20920.2 - Arabidopsis thaliana (Mouse-ear cress), partial (87%) [TC187222]
A_46_P079771	2.85124	2.8163	2.33873	58ACPE48_UP_009_H10_17SEP2004_066 Brassica napus seed library Brassica napus cDNA 5', mRNA sequence [EE417800]	AT5G01500	encodes an ATP/ADP carrier that is located to the thylakoid membrane involved in providing ATP during thylakoid biogenesis and turnover
A_46_P254009	1.44756	2.09243	1.92123
A_46_P326215	29.7685	34.3326	16.6458	Rep: Chromosome chr17 scaffold_263, whole genome shotgun sequence - Vitis vinifera (Grape), partial (4%) [TC182880]	AT2G41710	Integrase-type DNA-binding superfamily protein; FUNCTIONS IN: DNA binding, sequence-specific DNA binding transcription factor activity; INVOLVED IN: regulation of transcription, DNA-dependent; LOCATED IN: nucleus; EXPRESSED IN: 22 plant structures; EXPRES
A_46_P324080	31.6891	31.3179	46.0839	Rep: 10 kDa chaperonin - Brassica napus (Rape), complete [TC181118]	AT1G14980	Encodes mitochondrial-localized chaperonin 10 that complements the E.coli groES mutant. Its mRNA is upregulated in response to heat shock treatment and is expressed uniformly in various organs.
A_46_P276753	3.08844	2.89103	2.96997		AT1G77620	P-loop containing nucleoside triphosphate hydrolases superfamily protein; FUNCTIONS IN: nucleoside-triphosphatase activity, nucleotide binding; INVOLVED IN: DNA repair, cell cycle; LOCATED IN: nucleus; CONTAINS InterPro DOMAIN/s: Checkpoint protein Rad24
A_46_P144489	2.23793	1.58249	1.79572	Rep: Ribosomal protein L36 - Vitis vinifera (Grape), partial (59%) [TC187642]	AT5G20180	Ribosomal protein L36; FUNCTIONS IN: structural constituent of ribosome; INVOLVED IN: translation, ribosome biogenesis; LOCATED IN: ribosome, intracellular; EXPRESSED IN: 24 plant structures; EXPRESSED DURING: 15 growth stages; CONTAINS InterPro DOMAIN/s:
A_46_P094031	3.88874	4.04018	2.65577	BN18DYSC_UP_093_F06_6MAR2008_038 BN18DYSC Brassica napus cDNA 5', mRNA sequence [FG561110]
A_46_P246079	2.23757	2.2888	2.03867
A_46_P131394	2.38999	1.41121	2.09726	Rep: Cell division control protein 48 homolog A - Arabidopsis thaliana (Mouse-ear cress), partial (37%) [TC184244]	AT3G09840	Encodes a cell division cycle protein, a member of AAA-type ATPases gene family. Expressed throughout the plant in regions of cell division. Within the cell, sub-cellular localization varies depending on the stage of the cell cycle.Mutants in which the ex
A_46_P178864	1.89625	2.16423	1.7926	0094670 Brassica napus Leaf library Brassica napus cDNA, mRNA sequence [EV102347]	AT5G52960	unknown protein; FUNCTIONS IN: molecular_function unknown; INVOLVED IN: biological_process unknown; LOCATED IN: chloroplast; EXPRESSED IN: 23 plant structures; EXPRESSED DURING: 13 growth stages; CONTAINS InterPro DOMAIN/s: Protein of unknown function DUF
A_46_P083446	2.15008	1.66352	1.86894	0142899 Brassica napus Etiolated seedlings (Uni-ZAP) Brassica napus cDNA, mRNA sequence [EV166089]	AT5G25510	Protein phosphatase 2A regulatory B subunit family protein; FUNCTIONS IN: protein phosphatase type 2A regulator activity; INVOLVED IN: signal transduction; LOCATED IN: chloroplast, protein phosphatase type 2A complex; EXPRESSED IN: 24 plant structures; EX
A_46_P036826	1.94043	2.58262	2.08721	Bn01b_04f22_A Bn01b_AAFC_ECORC_transgenic_Brassica_napus_overexpressing_BNCBF17_constitutively_frost_tolerant Brassica napus cDNA clone Bn01b_04f22, mRNA sequence [CB686406]
A_46_P265513	2.07569	1.63635	1.97341	Rep: Betaine-aldehyde dehydrogenase - Chorispora bungeana (Blue mustard), complete [TC165860]
A_46_P224159	2.25043	1.75711	1.70677	Rep: Chromosome chr4 scaffold_6, whole genome shotgun sequence - Vitis vinifera (Grape), partial (95%) [TC162755]	AT5G11500	unknown protein; FUNCTIONS IN: molecular_function unknown; INVOLVED IN: biological_process unknown; LOCATED IN: cellular_component unknown; EXPRESSED IN: 24 plant structures; EXPRESSED DURING: 15 growth stages; CONTAINS InterPro DOMAIN/s: Protein of unkno
A_46_P304105	10.6983	-1.07494	-1.54054
A_46_P061611	2.13862	2.6576	1.24811	BNARO2GH_T3_015_G09_15DEC2006_067 Brassica napus BNARO2GH Brassica napus cDNA 5', mRNA sequence [ES911961]	AT4G36720	HVA22-like protein K (HVA22K); CONTAINS InterPro DOMAIN/s: TB2/DP1/HVA22 related protein (InterPro:IPR004345); BEST Arabidopsis thaliana protein match is: HVA22 homologue B (TAIR:AT5G62490.1); Has 1515 Blast hits to 1515 proteins in 211 species: Archae -
A_46_P073276	2.49634	2.6116	2.61006	BNYS8DCT_UP_023_D03_20APR2005_025 Brassica napus seeds BNYS8DCT Brassica napus cDNA 5', mRNA sequence [EE482248]	AT3G02800	Encodes an atypical dual-speci&#64257;city phosphatase.
A_46_P202229	2.67711	1.76041	2.19648	0107351 Brassica napus Damaged cotyledons Brassica napus cDNA, mRNA sequence [EV225425]	AT3G61980	serine protease inhibitor, Kazal-type family protein; FUNCTIONS IN: serine-type endopeptidase inhibitor activity; INVOLVED IN: biological_process unknown; LOCATED IN: plasma membrane, anchored to membrane; EXPRESSED IN: 24 plant structures; EXPRESSED DURI
A_46_P244294	2.62455	2.9877	3.11463		AT5G67250	Encodes an SKP1 interacting partner (SKIP2).Encodes an F-box protein. Based on genetic analysis appears to be functionally redundant with VFB1,2, and 3. When expression of all 4 genes is reduced plants show defects in growth and reduced expression of auxi
A_46_P298530	3.32746	2.05881	1.89056
A_46_P154794	3.85008	8.40336	8.32815	Rep: Dihydroorotate dehydrogenase - Haemophilus influenzae 22.4-21, partial (6%) [TC179184]
A_46_P236009	5.56962	2.24986	1.92941	Rep: Serine/threonine-protein kinase Mak (Male germ cell-associated kinase)-like protein - Arabidopsis thaliana (Mouse-ear cress), partial (10%) [TC209412]
A_46_P249724	212.862	198.366	220.278	Rep: Uncharacterized protein At4g05320.3 - Arabidopsis thaliana (Mouse-ear cress), partial (89%) [TC165525]
A_46_P055751	4.21726	4.12694	3.69382	Rep: F-box/LRR-repeat protein At3g58930 - Arabidopsis thaliana (Mouse-ear cress), partial (56%) [TC191145]	AT3G58900	F-box/RNI-like superfamily protein; INVOLVED IN: biological_process unknown; LOCATED IN: endomembrane system; CONTAINS InterPro DOMAIN/s: F-box domain, cyclin-like (InterPro:IPR001810), FBD-like (InterPro:IPR006566), F-box domain, Skp2-like (InterPro:IPR0
A_46_P374775	13.8817	9.77739	9.04758
A_46_P082961	4.16615	-2.43726	-2.12007	0188166 Brassica napus Apical meristem Brassica napus cDNA, mRNA sequence [EV091600]	AT2G43590	Chitinase family protein; FUNCTIONS IN: chitin binding, chitinase activity; INVOLVED IN: carbohydrate metabolic process, cell wall macromolecule catabolic process; LOCATED IN: endomembrane system; EXPRESSED IN: 7 plant structures; EXPRESSED DURING: LP.04
A_46_P316440	1.16564	2.0813	2.68453	Rep: Myrosinase-binding protein - Brassica napus (Rape), partial (36%) [TC173869]
A_46_P369390	2.21978	2.6281	2.17667	Rep: metalloendopeptidase - Arabidopsis thaliana, partial (48%) [TC187891]	AT5G51540	Zincin-like metalloproteases family protein; FUNCTIONS IN: metalloendopeptidase activity; INVOLVED IN: proteolysis; LOCATED IN: chloroplast thylakoid membrane, chloroplast; CONTAINS InterPro DOMAIN/s: Peptidase M3A/M3B, thimet/oligopeptidase F (InterPro:I
A_46_P162329	2.89016	-1.78815	-2.76524	Rep: SigA binding protein - Arabidopsis thaliana (Mouse-ear cress), partial (85%) [TC171239]	AT3G56710	Sig1 binding protein; interacts with Sig1R4. As well as Sig1, SibI is imported into chloroplasts and its expression is light-dependent in mature chloroplasts.
A_46_P037216	480.174	379.561	156.397	0191239 Brassica napus Apical meristem Brassica napus cDNA, mRNA sequence [EV093370]
A_46_P144799	1.40801	1.39017	2.57259	Rep: Chromosome chr18 scaffold_137, whole genome shotgun sequence - Vitis vinifera (Grape), partial (60%) [TC207249]
A_46_P319515	1.61504	2.44334	2.5087
A_46_P343385	1.06422	3.62698	2.58174	Rep: Probable branched-chain-amino-acid aminotransferase 4 - Arabidopsis thaliana (Mouse-ear cress), partial (30%) [TC194811]	AT3G19710	Belongs to the branched-chain amino acid aminotransferase gene family. Encodes a methionine-oxo-acid transaminase. Involved in the methionine chain elongation pathway that leads to the ultimate biosynthesis of methionine-derived glucosinolates.
A_46_P314520	1.8648	2.02714	1.97969	Rep: Chromosome chr17 scaffold_101, whole genome shotgun sequence - Vitis vinifera (Grape), partial (16%) [TC171872]	AT1G74720	Encodes a putative transmembrane protein carrying four C(2) domains, suggesting that QKY may function in membrane trafficking in a Ca(2+)-dependent fashion. Mutant analysis shows that this gene is involved in organ development.
A_46_P206234	4.34832	3.63672	3.01049		AT2G14100	a member of the cytochrome P450 family
A_46_P191729	3.73365	3.49515	3.46798	Rep: NADC homolog - Arabidopsis thaliana (Mouse-ear cress), partial (62%) [TC168966]	AT2G01350	At2g01350 encodes quinolinate phosphoribosyl transferase involved in NAD biosynthesis as shown by heterologous expression in E. coli.
A_46_P021671	1.70276	1.44619	12.063	BN25.043I14F011128 BN25 Brassica napus cDNA clone BN25043I14, mRNA sequence [CD821953]
A_46_P133019	2.59153	3.38202	2.82309
A_46_P072526	5.09051	5.94289	6.00663	BNYS6DCT_UP_018_F12_04MAY2005_086 Brassica napus seeds BNYS6DCT Brassica napus cDNA 5', mRNA sequence [EE479497]
A_46_P093736	5.49156	2.30583	6.55032	BNQA_UP_055_A06_03OCT2003_048 Brassica napus BNQA Brassica napus cDNA 5', mRNA sequence [EE551544]	AT5G03780	Encodes a protein whose sequence is similar to human telomere proteins. This belongs to TRFL family 2, which do not show DNA binding in vitro.
A_46_P295878	1.57368	1.7125	2.27169	Rep: E3 ubiquitin-protein ligase SINA-like 7 - Arabidopsis thaliana (Mouse-ear cress), partial (57%) [TC177880]	AT5G37890	Protein with RING/U-box and TRAF-like domains; FUNCTIONS IN: ubiquitin-protein ligase activity, zinc ion binding; INVOLVED IN: multicellular organismal development, protein ubiquitination, ubiquitin-dependent protein catabolic process; LOCATED IN: nucleus
A_46_P015926	1.7589	2.01393	2.03493	BNSCS5CT_UP_024_D04_21JAN2005_026 Brassica napus seed coat BNSCS5CT Brassica napus cDNA 5', mRNA sequence [EE472399]
A_46_P303915	6.80117	6.63859	7.32618		AT3G09740	syntaxin of plants 71 (SYP71)
A_46_P128609	64.7261	167.334	333.395
A_46_P285163	108.914	160.011	175.064	Rep: DnaJ-like protein - Arabidopsis thaliana (Mouse-ear cress), partial (81%) [TC180064]
A_46_P015646	3.53563	5.32175	4.20746	BNARO6GH_T3_016_D05_07DEC2006_041 Brassica napus BNARO6GH Brassica napus cDNA 5', mRNA sequence [ES910194]
A_46_P148894	2.90201	2.6183	3.14507		AT4G32470	Cytochrome bd ubiquinol oxidase, 14kDa subunit; FUNCTIONS IN: ubiquinol-cytochrome-c reductase activity; INVOLVED IN: mitochondrial electron transport, ubiquinol to cytochrome c; LOCATED IN: mitochondrion, plasma membrane, plastid, mitochondrial respirato
A_46_P046981	6.15956	7.7079	4.91346	Rep: RSZp22 protein - Arabidopsis thaliana (Mouse-ear cress), partial (88%) [TC192029]
A_46_P224184	2.54141	1.47175	1.43511	Rep: Photoassimilate-responsive protein PAR-1b-like protein - Arabidopsis thaliana (Mouse-ear cress), partial (93%) [TC180166]	AT3G54040	PAR1 protein; FUNCTIONS IN: molecular_function unknown; INVOLVED IN: biological_process unknown; LOCATED IN: endomembrane system; EXPRESSED IN: 20 plant structures; EXPRESSED DURING: 10 growth stages; CONTAINS InterPro DOMAIN/s: PAR1 (InterPro:IPR009489);
A_46_P040846	2.11918	1.99943	2.46242	BNDH2DCT_UP_006_D03_12JUN2004_025 Brassica napus seeds BNDH2DCT Brassica napus cDNA 5', mRNA sequence [DW997515]	AT4G33220	pectin methylesterase 44 (PME44); FUNCTIONS IN: enzyme inhibitor activity, pectinesterase activity; INVOLVED IN: cell wall modification; LOCATED IN: endomembrane system, cell wall, plant-type cell wall; EXPRESSED IN: 22 plant structures; EXPRESSED DURING:
A_46_P342805	1.92717	2.64317	3.29657	Rep: Chromosome chr14 scaffold_21, whole genome shotgun sequence - Vitis vinifera (Grape), partial (42%) [TC194464]	AT5G39940	FAD/NAD(P)-binding oxidoreductase family protein; CONTAINS InterPro DOMAIN/s: Conserved hypothetical protein CHP00275, flavoprotein HI0933-like (InterPro:IPR004792); Has 4590 Blast hits to 4585 proteins in 1655 species: Archae - 24; Bacteria - 3709; Metaz
A_46_P330665	2.33786	1.6804	1.61039	Rep: Chromosome chr5 scaffold_67, whole genome shotgun sequence - Vitis vinifera (Grape), partial (85%) [TC186228]	AT2G43080	Encodes a prolyl-4 hydroxylase that can hydroxylate poly(L-proline),the collagen model peptide (Pro-Pro-Gly)10 and other proline rich peptides.
A_46_P202084	1.02881	3.76338	2.54607	Rep: Probable branched-chain-amino-acid aminotransferase 4 - Arabidopsis thaliana (Mouse-ear cress), partial (90%) [TC170012]	AT3G19710	Belongs to the branched-chain amino acid aminotransferase gene family. Encodes a methionine-oxo-acid transaminase. Involved in the methionine chain elongation pathway that leads to the ultimate biosynthesis of methionine-derived glucosinolates.
A_46_P051166	1.65656	1.55332	2.08212	BNAPO1GH_T3_007_F05_14JUN2007_037 BNAPO1GH Brassica napus cDNA 5', mRNA sequence [GR450746]	AT3G01050	membrane-anchored ubiquitin-fold protein 1 precursor (MUB1); CONTAINS InterPro DOMAIN/s: Membrane-anchored ubiquitin-fold protein, HCG-1 (InterPro:IPR017000), Ubiquitin supergroup (InterPro:IPR019955); BEST Arabidopsis thaliana protein match is: membrane-
A_46_P257554	2.09271	1.84355	1.7797
A_46_P242129	2.16253	1.5407	1.82047		AT3G14980	Acyl-CoA N-acyltransferase with RING/FYVE/PHD-type zinc finger protein; FUNCTIONS IN: DNA binding, zinc ion binding, N-acetyltransferase activity; INVOLVED IN: regulation of transcription, DNA-dependent, metabolic process; LOCATED IN: nucleus; EXPRESSED I
A_46_P070141	5.49139	2.70716	2.88035	BNARO1GH_T3_002_E07_22NOV2006_055 Brassica napus BNARO1GH Brassica napus cDNA 5', mRNA sequence [ES901741]
A_46_P166554	2.58957	2.92319	2.87163	Rep: Serine/threonine-protein phosphatase PP1 isozyme 9 - Arabidopsis thaliana (Mouse-ear cress), partial (18%) [TC164953]	AT3G05580	Calcineurin-like metallo-phosphoesterase superfamily protein; CONTAINS InterPro DOMAIN/s: Metallophosphoesterase (InterPro:IPR004843), Serine/threonine-specific protein phosphatase/bis(5-nucleosyl)-tetraphosphatase (InterPro:IPR006186); BEST Arabidopsis t
A_46_P285894	43.3211	41.0012	12.9483	BNDH5DCT_UP_026_F01_28JAN2004_005 Brassica napus BNDH5DCT Brassica napus cDNA 5', mRNA sequence [EE462467]
A_46_P287738	2.92679	1.40799	1.23395		AT3G56200	Encodes a putative amino acid transporter.
A_46_P042666	2.92534	3.08563	2.99226	BNSCS2CT_UP_189_E07_27APR2007_055 Brassica napus BNSCS2CT Brassica napus cDNA 5', mRNA sequence [EV029592]	AT5G15910	NAD(P)-binding Rossmann-fold superfamily protein; FUNCTIONS IN: coenzyme binding, binding, catalytic activity; INVOLVED IN: cellular metabolic process, metabolic process; EXPRESSED IN: 26 plant structures; EXPRESSED DURING: 15 growth stages; CONTAINS Inte
A_46_P063841	2.25552	2.20734	1.79813	BNBS6DCT_UP_030_B04_14APR2005_030 Brassica napus seeds BNBS6DCT Brassica napus cDNA 5', mRNA sequence [EE458112]	AT1G73290	serine carboxypeptidase-like 5 (scpl5); FUNCTIONS IN: serine-type carboxypeptidase activity; INVOLVED IN: proteolysis; LOCATED IN: endomembrane system; EXPRESSED IN: hypocotyl, root; CONTAINS InterPro DOMAIN/s: Peptidase S10, serine carboxypeptidase (Inte
A_46_P177834	3.10378	3.62918	1.75693	Rep: Leucine aminopeptidase 3, chloroplast precursor - Arabidopsis thaliana (Mouse-ear cress), partial (39%) [TC176059]	AT4G30920	Cytosol aminopeptidase family protein; FUNCTIONS IN: manganese ion binding, metalloexopeptidase activity, aminopeptidase activity; INVOLVED IN: proteolysis, protein metabolic process; LOCATED IN: chloroplast, vacuole; EXPRESSED IN: guard cell, cultured ce
A_46_P336075	7.54252	2.4373	2.18679	Rep: AT5g53310/K19E1_11 - Arabidopsis thaliana (Mouse-ear cress), partial (54%) [TC190204]	AT5G53310	myosin heavy chain-related; FUNCTIONS IN: motor activity; INVOLVED IN: biological_process unknown; LOCATED IN: plasma membrane; EXPRESSED IN: 25 plant structures; EXPRESSED DURING: 15 growth stages; CONTAINS InterPro DOMAIN/s: Myosin tail 2 (InterPro:IPR0
A_46_P378873	2.34941	3.43929	3.54376		AT3G04605	transposable element gene; Mutator-like transposase family, has a 5.9e-64 P-value blast match to GB:AAA21566 mudrA of transposon="MuDR" (MuDr-element) (Zea mays)
A_46_P329570	5.50235	4.65093	4.20174	Rep: Chromosome chr5 scaffold_72, whole genome shotgun sequence - Vitis vinifera (Grape), partial (97%) [TC185502]	AT2G31840	Thioredoxin superfamily protein; LOCATED IN: chloroplast; EXPRESSED IN: 21 plant structures; EXPRESSED DURING: 13 growth stages; CONTAINS InterPro DOMAIN/s: Thioredoxin-like fold (InterPro:IPR012336); BEST Arabidopsis thaliana protein match is: unknown pr
A_46_P045036	1.44047	2.53126	2.24702	0157021 Brassica napus Etiolated seedlings (pSPORT1) Brassica napus cDNA, mRNA sequence [EV183195]
A_46_P229144	1.52352	1.48764	2.59904	BNARO4GH_T3_030_D12_25NOV2006_090 Brassica napus BNARO4GH Brassica napus cDNA 5', mRNA sequence [ES905490]	AT3G48960	Ribosomal protein L13e family protein; FUNCTIONS IN: structural constituent of ribosome; INVOLVED IN: translation, ribosome biogenesis; LOCATED IN: ribosome, cytosolic large ribosomal subunit; EXPRESSED IN: 12 plant structures; EXPRESSED DURING: LP.04 fou
A_46_P042781	4.40639	4.61804	5.1082	BNZB_UP_070_A03_14MAY2004_031 Brassica napus BNZB Brassica napus cDNA 5', mRNA sequence [EE561404]	AT4G26220	S-adenosyl-L-methionine-dependent methyltransferases superfamily protein; FUNCTIONS IN: O-methyltransferase activity; LOCATED IN: cytosol; EXPRESSED IN: shoot, inflorescence meristem, root, flower; EXPRESSED DURING: petal differentiation and expansion sta
A_46_P185700	1.69999	1.80443	2.11312		AT4G09800	encodes a ribosomal protein S18C, a constituent of the small subunit of the ribosomal complex
A_46_P259124	2.53234	1.89539	2.14166	BNARO5GH_T3_008_D05_29NOV2006_041 Brassica napus BNARO5GH Brassica napus cDNA 5', mRNA sequence [ES905948]	AT1G74920	ALDH10A8 encodes a protein that has not been functionally characterized, but it is similar to an Arabidopsis protein that has betaine aldehyde dehydrogenase and aminoaldehyde dehydrogenase activity. ALDH10A8 localizes to leucoplasts. aldh10a8 mutant plant
A_46_P004461	1.23957	1.97487	2.3127	0162392 Brassica napus Flower Brassica napus cDNA, mRNA sequence [EV130279]
A_46_P333740	2.03063	2.45891	1.79587
A_46_P214099	1.53836	2.04174	2.89388	BNARO5GH_T3_002_G11_29NOV2006_083 Brassica napus BNARO5GH Brassica napus cDNA 5', mRNA sequence [ES907708]
A_46_P381001	79.1148	42.7481	65.9209	Rep: Chromosome chr11 scaffold_13, whole genome shotgun sequence - Vitis vinifera (Grape), partial (8%) [TC212547]	AT4G32600	zinc finger (C3HC4-type RING finger) family protein; FUNCTIONS IN: protein binding, zinc ion binding; LOCATED IN: plasma membrane; EXPRESSED IN: 24 plant structures; EXPRESSED DURING: 15 growth stages; CONTAINS InterPro DOMAIN/s: Zinc finger, RING-type (I
A_46_P355385	1.88531	1.93346	2.2037	Rep: Centromere/kinetochore protein zw10 homolog - Arabidopsis thaliana (Mouse-ear cress), partial (33%) [TC201403]	AT2G32900	homologous to Drosophila ZW10, a centromere/kinetochore protein involved in chromosome segregation
A_46_P311855	1.78114	2.49388	2.36481	Rep: AT5g13880/MAC12_16 - Arabidopsis thaliana (Mouse-ear cress), partial (85%) [TC169010]	AT5G13880	unknown protein; BEST Arabidopsis thaliana protein match is: unknown protein (TAIR:AT5G47920.1); Has 30201 Blast hits to 17322 proteins in 780 species: Archae - 12; Bacteria - 1396; Metazoa - 17338; Fungi - 3422; Plants - 5037; Viruses - 0; Other Eukaryot
A_46_P286458	2.14817	1.14697	1.23127	Rep: Chromosome chr1 scaffold_5, whole genome shotgun sequence - Vitis vinifera (Grape), partial (26%) [TC195653]	AT1G13750	Purple acid phosphatases superfamily protein; FUNCTIONS IN: hydrolase activity, protein serine/threonine phosphatase activity, metal ion binding, acid phosphatase activity; INVOLVED IN: biological_process unknown; LOCATED IN: endomembrane system; EXPRESSE
A_46_P131899	1.55535	2.099	2.13988	Rep: Photosystem I reaction center subunit IV A, chloroplast precursor - Arabidopsis thaliana (Mouse-ear cress), partial (98%) [TC176214]	AT4G28750	mutant has Decreased effective quantum yield of photosystem II; Pale green plants; Reduced growth rate; Subunit E of Photosystem I
A_46_P128809	1.54811	2.05175	2.0496	BN18DYSC_UP_191_H01_4APR2008_001 BN18DYSC Brassica napus cDNA 5', mRNA sequence [FG569278]	AT3G28940	AIG2-like (avirulence induced gene) family protein; FUNCTIONS IN: molecular_function unknown; INVOLVED IN: response to bacterium; LOCATED IN: plasma membrane, chloroplast; EXPRESSED IN: 23 plant structures; EXPRESSED DURING: 14 growth stages; CONTAINS Int
A_46_P061976	2.79435	1.69653	2.58058	BNBS2DCT_UP_034_E02_15MAR2005_008 Brassica napus seeds BNBS2DCT Brassica napus cDNA 5', mRNA sequence [EE453480]	AT1G48300	unknown protein; FUNCTIONS IN: molecular_function unknown; INVOLVED IN: biological_process unknown; LOCATED IN: endomembrane system; EXPRESSED IN: 24 plant structures; EXPRESSED DURING: 15 growth stages; Has 96 Blast hits to 87 proteins in 37 species: Arc
A_46_P073641	2.72289	3.93066	2.56329	BNZB_UP_098_A11_07JUN2004_095 Brassica napus BNZB Brassica napus cDNA 5', mRNA sequence [EE563653]	AT4G39940	adenosine-5'-phosphosulfate-kinase (akn2) mRNA, complete
A_46_P173834	1.63644	2.62714	2.17044	Rep: Importin subunit alpha-2 - Arabidopsis thaliana (Mouse-ear cress), partial (31%) [TC190256]	AT4G02150	Encodes IMPORTIN ALPHA 3. Mutant plants act as suppressors of snc1 response and salicylic acid accumulation. Located in the nucleus. Involved in protein import. Protein interacts with Agrobacterium proteins VirD2 and VirE2. Is not individually essential f
A_46_P031096	1.59797	1.63841	2.67155	BNARO4GH_T3_030_D12_25NOV2006_090 Brassica napus BNARO4GH Brassica napus cDNA 5', mRNA sequence [ES905490]	AT3G48960	Ribosomal protein L13e family protein; FUNCTIONS IN: structural constituent of ribosome; INVOLVED IN: translation, ribosome biogenesis; LOCATED IN: ribosome, cytosolic large ribosomal subunit; EXPRESSED IN: 12 plant structures; EXPRESSED DURING: LP.04 fou
A_46_P246569	2.81797	2.55005	1.93197	AAF03470.1 - Arabidopsis thaliana (Mouse-ear cress), partial (31%) [TC204277]	AT5G17700	MATE efflux family protein; FUNCTIONS IN: antiporter activity, drug transmembrane transporter activity, transporter activity; INVOLVED IN: drug transmembrane transport, transmembrane transport; LOCATED IN: membrane; EXPRESSED IN: 22 plant structures; EXPR
A_46_P135379	2.15765	1.6665	1.55622	Rep: Uncharacterized protein At5g62575.2 - Arabidopsis thaliana (Mouse-ear cress), complete [TC182775]	AT3G47833	unknown protein; BEST Arabidopsis thaliana protein match is: unknown protein (TAIR:AT5G62575.2); Has 42 Blast hits to 42 proteins in 12 species: Archae - 0; Bacteria - 0; Metazoa - 0; Fungi - 0; Plants - 42; Viruses - 0; Other Eukaryotes - 0 (source: NCBI
A_46_P253544	547.803	851.343	280.458
A_46_P249694	3.95757	2.17237	1.72392
A_46_P368765	31.8455	36.5919	48.3626	AAD43171.1 - Arabidopsis thaliana (Mouse-ear cress), partial (50%) [TC207506]
A_46_P314665	4.46248	-1.61957	-3.71788	Rep: Flavanone 3-hydroxylase-like protein - Arabidopsis thaliana (Mouse-ear cress), partial (56%) [TC172027]	AT5G24530	Encodes a putative 2OG-Fe(II) oxygenase that is defense-associated but required for susceptibility to downy mildew.
A_46_P236669	2.08918	1.79901	1.98833		AT4G05410	Encodes a nucleolar protein with seven WD40-repeats that plays a role in embryo sac development and is critical for the correct positioning of the division plane of zygote and the apical cell lineage in Arabidopsis. YAO may act by modulating nucleolar
A_46_P157619	2.20471	2.43726	2.44948	Rep: Chromosome chr11 scaffold_13, whole genome shotgun sequence - Vitis vinifera (Grape), complete [TC183473]	AT2G19790	SNARE-like superfamily protein; FUNCTIONS IN: protein transporter activity; INVOLVED IN: intracellular protein transport, transport, protein transport; LOCATED IN: clathrin vesicle coat; EXPRESSED IN: 24 plant structures; EXPRESSED DURING: 15 growth stage
A_46_P339190	530.244	1139.13	295.236	Rep: Genomic DNA, chromosome 3, BAC clone: T13O13 - Arabidopsis thaliana (Mouse-ear cress), partial (45%) [TC192264]	AT3G32930	unknown protein; FUNCTIONS IN: molecular_function unknown; INVOLVED IN: biological_process unknown; LOCATED IN: chloroplast envelope; EXPRESSED IN: 22 plant structures; EXPRESSED DURING: 13 growth stages; Has 57 Blast hits to 57 proteins in 11 species: Ar
A_46_P176049	19.7955	23.99	24.2948	Rep: Proline-rich protein APG-like; GDSL-motif lipase/hydrolase-like protein - Arabidopsis thaliana (Mouse-ear cress), partial (93%) [TC174264]	AT3G16370	GDSL-like Lipase/Acylhydrolase superfamily protein; FUNCTIONS IN: hydrolase activity, acting on ester bonds, carboxylesterase activity; INVOLVED IN: lipid metabolic process; LOCATED IN: apoplast; EXPRESSED IN: 22 plant structures; EXPRESSED DURING: 14 gro
A_46_P011926	70.1321	63.8577	61.4505	BNSCS4CT_UP_217_D06_23MAY2007_042 Brassica napus BNSCS4CT Brassica napus cDNA 5', mRNA sequence [EV075122]
A_46_P188704	3.19595	2.8463	2.3863	Rep: RNA binding / tRNA (guanine-N2-)-methyltransferase - Arabidopsis thaliana, partial (59%) [TC165268]	AT3G02320	N2,N2-dimethylguanosine tRNA methyltransferase; FUNCTIONS IN: RNA binding, tRNA (guanine-N2-)-methyltransferase activity; INVOLVED IN: tRNA processing; LOCATED IN: cellular_component unknown; EXPRESSED IN: 15 plant structures; EXPRESSED DURING: 6 growth s
A_46_P276918	49.2768	53.6283	17.2268	Rep: 60S ribosomal protein L22-3 - Arabidopsis thaliana (Mouse-ear cress), partial (96%) [TC179281]
A_46_P037501	2.66782	3.26616	1.82693	56ACAC48_UP_029_E08_22DEC2004_056 Brassica napus Brassica napus cDNA 5', mRNA sequence [EE414351]	AT1G23070	Protein of unknown function (DUF300); CONTAINS InterPro DOMAIN/s: Protein of unknown function DUF300 (InterPro:IPR005178); BEST Arabidopsis thaliana protein match is: Protein of unknown function (DUF300) (TAIR:AT4G38360.2); Has 840 Blast hits to 837 prote
A_46_P025361	1.92818	2.00615	1.79785	BNSCS2CT_UP_157_D03_23APR2007_025 Brassica napus BNSCS2CT Brassica napus cDNA 5', mRNA sequence [EV027278]	AT4G03150	unknown protein; FUNCTIONS IN: molecular_function unknown; INVOLVED IN: biological_process unknown; LOCATED IN: chloroplast; EXPRESSED IN: 20 plant structures; EXPRESSED DURING: 13 growth stages; Has 30201 Blast hits to 17322 proteins in 780 species: Arch
A_46_P249164	48.9383	98.7201	171.58
A_46_P114484	3.26868	4.08029	12.1461	Rep: At1g09510 - Arabidopsis thaliana (Mouse-ear cress), partial (92%) [TC178002]
A_46_P293688	1.5341	1.6117	2.37778		AT1G73360	Encodes a homeobox-leucine zipper family protein belonging to the HD-ZIP IV family. It is involved in trichome branching.
A_46_P317570	19.4484	19.5418	17.1813	Rep: Arabidopsis thaliana genomic DNA, chromosome 3, BAC clone:F4B12 - Arabidopsis thaliana (Mouse-ear cress), partial (86%) [TC174932]	AT3G15160	unknown protein; Has 266 Blast hits to 264 proteins in 44 species: Archae - 0; Bacteria - 0; Metazoa - 58; Fungi - 0; Plants - 199; Viruses - 0; Other Eukaryotes - 9 (source: NCBI BLink).
A_46_P141519	3.19708	3.5641	3.42116	Rep: Hydrogen-transporting ATP synthase - Brassica campestris (Field mustard), partial (64%) [TC171595]
A_46_P321260	38.0268	69.3507	36.9139	Rep: Isoform 2 of Q8L828 - Arabidopsis thaliana (Mouse-ear cress), partial (47%) [TC178647]	AT3G15980	Coatomer, beta' subunit; FUNCTIONS IN: structural molecule activity; INVOLVED IN: intracellular protein transport, vesicle-mediated transport; LOCATED IN: membrane coat, COPI vesicle coat; EXPRESSED IN: 24 plant structures; EXPRESSED DURING: 13 growth sta
A_46_P095846	2.08739	2.01735	1.8829	BNQA_UP_146_C03_10NOV2005_027 Brassica napus BNQA Brassica napus cDNA 5', mRNA sequence [EE555770]
A_46_P088636	1.86756	15.0139	1.86455	0095676 Brassica napus Leaf library Brassica napus cDNA, mRNA sequence [EV103984]	AT2G33845	Nucleic acid-binding, OB-fold-like protein; FUNCTIONS IN: molecular_function unknown; INVOLVED IN: biological_process unknown; LOCATED IN: chloroplast; EXPRESSED IN: 22 plant structures; EXPRESSED DURING: 13 growth stages; CONTAINS InterPro DOMAIN/s: Nucl
A_46_P313195	170.027	106.834	91.3386	Rep: SCARECROW transcriptional regulator-like protein - Arabidopsis thaliana (Mouse-ear cress), partial (64%) [TC170477]	AT5G59450	GRAS family transcription factor; CONTAINS InterPro DOMAIN/s: Transcription factor GRAS (InterPro:IPR005202); BEST Arabidopsis thaliana protein match is: GRAS family transcription factor (TAIR:AT3G46600.1); Has 1807 Blast hits to 1807 proteins in 277 spec
A_46_P143999	2.91361	2.84878	2.96018
A_46_P260993	6.65241	2.39119	2.9424	Rep: Small ribosomal subunit protein S13, mitochondrial precursor - Arabidopsis thaliana (Mouse-ear cress), complete [TC198795]	AT1G77750	Ribosomal protein S13/S18 family; FUNCTIONS IN: structural constituent of ribosome, RNA binding, nucleic acid binding; INVOLVED IN: translation; LOCATED IN: mitochondrion, small ribosomal subunit, mitochondrial small ribosomal subunit; EXPRESSED IN: 23 pl
A_46_P319870	797.967	391.353	187.648	Rep: Receptor-like protein kinase homolog - Arabidopsis thaliana (Mouse-ear cress), partial (16%) [TC177278]
A_46_P283583	2.0889	1.89195	1.97865
A_46_P168099	2.11399	2.22168	2.25984	EST8316 11-19 DAP Brassica Napus seed cDNA library Brassica napus cDNA clone B460E021, mRNA sequence [EL630808]
A_46_P372600	1.98158	2.21357	2.24385	Rep: Mlr8518 protein - Rhizobium loti (Mesorhizobium loti), partial (5%) [TC209158]	AT2G25970	KH domain-containing protein; FUNCTIONS IN: RNA binding, nucleic acid binding; EXPRESSED IN: 23 plant structures; EXPRESSED DURING: 14 growth stages; CONTAINS InterPro DOMAIN/s: K Homology, type 1, subgroup (InterPro:IPR018111), K Homology (InterPro:IPR00
A_46_P335600	39.0119	8.70723	4.91852	Rep: Chromosome chr8 scaffold_23, whole genome shotgun sequence - Vitis vinifera (Grape), partial (31%) [TC189818]	AT3G11600	unknown protein; FUNCTIONS IN: molecular_function unknown; INVOLVED IN: response to karrikin; EXPRESSED IN: 21 plant structures; EXPRESSED DURING: 12 growth stages; BEST Arabidopsis thaliana protein match is: unknown protein (TAIR:AT5G06270.1); Has 171 Bl
A_46_P093201	1.97704	1.8342	2.23159	BNARO5GH_T3_010_G04_30NOV2006_020 Brassica napus BNARO5GH Brassica napus cDNA 5', mRNA sequence [ES906166]	AT4G34920	PLC-like phosphodiesterases superfamily protein; FUNCTIONS IN: phospholipase C activity, phosphoric diester hydrolase activity; INVOLVED IN: triglyceride biosynthetic process, intracellular signaling pathway, lipid metabolic process, phospholipid biosynth
A_46_P357235	3.33407	2.81838	5.85171	Rep: Arabidopsis thaliana genomic DNA, chromosome 3, P1 clone: MOE17 - Arabidopsis thaliana (Mouse-ear cress), partial (25%) [TC202331]	AT3G20790	NAD(P)-binding Rossmann-fold superfamily protein; FUNCTIONS IN: oxidoreductase activity, binding, catalytic activity; INVOLVED IN: oxidation reduction, metabolic process; EXPRESSED IN: 23 plant structures; EXPRESSED DURING: 15 growth stages; CONTAINS Inte
A_46_P291158	2.06585	1.88927	1.54588	Rep: F25A4.17 - Arabidopsis thaliana (Mouse-ear cress), partial (48%) [TC205399]	AT1G74860	unknown protein; BEST Arabidopsis thaliana protein match is: unknown protein (TAIR:AT1G19010.1); Has 210 Blast hits to 193 proteins in 61 species: Archae - 0; Bacteria - 9; Metazoa - 75; Fungi - 18; Plants - 58; Viruses - 1; Other Eukaryotes - 49 (source:
A_46_P202405	3.50776	1.94547	2.48106	Rep: Uncharacterized protein At3g57020.2 - Arabidopsis thaliana (Mouse-ear cress), complete [TC196648]
A_46_P246279	3.06547	3.41701	3.32497		AT1G02140	MAGO NASHI (MAGO); FUNCTIONS IN: protein binding; INVOLVED IN: pollen tube guidance, sex determination, embryo development ending in seed dormancy; LOCATED IN: in 6 components; EXPRESSED IN: 25 plant structures; EXPRESSED DURING: 15 growth stages; CONTAIN
A_46_P217024	8.72974	1.70667	1.97381	Rep: Actin-depolymerizing factor 3 - Arabidopsis thaliana (Mouse-ear cress), complete [TC199954]	AT5G59880	Encodes actin depolymerizing factor 3 (ADF3).
A_46_P257184	2.22805	2.39752	2.37273	Rep: Genomic DNA, chromosome 5, TAC clone:K14B20 - Arabidopsis thaliana (Mouse-ear cress), partial (84%) [TC191577]
A_46_P328225	3.98608	5.16207	5.28574	Brassica napus ubiquitin 10.1 (UBQ10.1) mRNA, complete cds [FJ529184]
A_46_P319030	1.40664	3.85962	1.17788	Rep: Pectin methyl-esterase-like protein - Arabidopsis thaliana (Mouse-ear cress), partial (18%) [TC198751]	AT3G56360	unknown protein; FUNCTIONS IN: molecular_function unknown; INVOLVED IN: biological_process unknown; LOCATED IN: chloroplast; EXPRESSED IN: 24 plant structures; EXPRESSED DURING: 15 growth stages; BEST Arabidopsis thaliana protein match is: unknown protein
A_46_P250059	2.21118	1.89264	1.81308		AT4G31570	CONTAINS InterPro DOMAIN/s: Prefoldin (InterPro:IPR009053); BEST Arabidopsis thaliana protein match is: unknown protein (TAIR:AT1G24460.1); Has 194354 Blast hits to 66887 proteins in 3244 species: Archae - 3688; Bacteria - 38556; Metazoa - 84828; Fungi -
A_46_P341450	176.202	166.287	170.502	Rep: Transketolase-like protein - Arabidopsis thaliana (Mouse-ear cress), partial (27%) [TC193655]	AT2G45290	Transketolase; FUNCTIONS IN: catalytic activity, transketolase activity; INVOLVED IN: response to cadmium ion; LOCATED IN: chloroplast stroma, chloroplast; EXPRESSED IN: 25 plant structures; EXPRESSED DURING: 16 growth stages; CONTAINS InterPro DOMAIN/s:
A_46_P144619	1.17484	1.14153	2.1607	Rep: Isoform 2 of Q75ZZ6 - Sus scrofa (Pig), partial (6%) [TC193505]
A_46_P083261	1.86996	1.73475	2.07126	BNARO4GH_T3_005_E07_24NOV2006_055 Brassica napus BNARO4GH Brassica napus cDNA 5', mRNA sequence [ES902796]	AT5G07820	Plant calmodulin-binding protein-related; CONTAINS InterPro DOMAIN/s: Calmodulin-binding protein, plant (InterPro:IPR012417); BEST Arabidopsis thaliana protein match is: Plant calmodulin-binding protein-related (TAIR:AT5G61260.1); Has 1807 Blast hits to 1
A_46_P130159	4.72202	3.96645	8.05522	BN18DYSC_UP_155_G06_4APR2008_036 BN18DYSC Brassica napus cDNA 5', mRNA sequence [FG566149]	AT1G11440	BEST Arabidopsis thaliana protein match is: glycine-rich protein (TAIR:AT3G29075.1); Has 19337 Blast hits to 8589 proteins in 488 species: Archae - 26; Bacteria - 641; Metazoa - 7852; Fungi - 2167; Plants - 955; Viruses - 616; Other Eukaryotes - 7080 (sou
A_46_P207644	3.28643	2.63127	2.76589		AT2G42120	DNA polymerase delta small subunit (POLD2); FUNCTIONS IN: DNA binding, DNA-directed DNA polymerase activity; INVOLVED IN: DNA replication; EXPRESSED IN: 18 plant structures; EXPRESSED DURING: 7 growth stages; CONTAINS InterPro DOMAIN/s: DNA polymerase alp
A_46_P346820	2.41334	2.59569	2.31028	Rep: F2P16.20 protein - Arabidopsis thaliana (Mouse-ear cress), partial (29%) [TC196856]
A_46_P282718	2.0845	1.57087	2.24156
A_46_P196194	2.06699	3.37372	7.19673		AT1G76700	DNAJ heat shock N-terminal domain-containing protein; FUNCTIONS IN: unfolded protein binding, heat shock protein binding; INVOLVED IN: protein folding; LOCATED IN: cellular_component unknown; EXPRESSED IN: 24 plant structures; EXPRESSED DURING: 13 growth
A_46_P045386	3.23683	2.7646	3.64019	BNSCSICT_UP_023_A06_16DEC2004_048 Brassica napus seed coat BNSCSICT Brassica napus cDNA 5', mRNA sequence [DY011371]
A_46_P019796	3.3058	2.56151	2.30838	BN18DYSC_UP_040_B10_19FEB2008_078 BN18DYSC Brassica napus cDNA 5', mRNA sequence [FG556362]	AT1G10600	associated molecule with the SH3 domain of STAM 2 (AMSH2); FUNCTIONS IN: molecular_function unknown; INVOLVED IN: ubiquitin-dependent protein catabolic process; LOCATED IN: chloroplast; EXPRESSED IN: cultured cell; CONTAINS InterPro DOMAIN/s: Mov34/MPN/PA
A_46_P215084	1.97574	2.16847	2.25194	Rep: Lipoic acid synthase - Arabidopsis thaliana (Mouse-ear cress), partial (41%) [TC212489]	AT5G08415	Radical SAM superfamily protein; FUNCTIONS IN: 4 iron, 4 sulfur cluster binding, lipoic acid synthase activity, iron-sulfur cluster binding, lipoate synthase activity, catalytic activity; INVOLVED IN: lipoic acid biosynthetic process, lipoate biosynthetic
A_46_P135224	2.17009	2.29582	2.35996	Rep: CAX-interacting protein 4 - Arabidopsis thaliana (Mouse-ear cress), partial (51%) [TC172099]	AT2G28910	Encodes a CAX-interacting protein (CXIP4). The gene product is located in the nucleus of GFP-CXIP4-expressing yeast cells. When transiently expressed in the tobacco leaves, GFP-CXIP4 locates to the nucleus as well as in discrete areas of the cytoplasm (wh
A_46_P313890	2.504	2.35249	2.21401	Rep: Rac-like GTP-binding protein ARAC3 precursor - Arabidopsis thaliana (Mouse-ear cress), complete [TC171225]
A_46_P360250	2.27554	2.35223	2.12093	Rep: At1g47530/F16N3_20 - Arabidopsis thaliana (Mouse-ear cress), partial (37%) [TC203795]	AT1G47530	MATE efflux family protein; FUNCTIONS IN: antiporter activity, drug transmembrane transporter activity, transporter activity; INVOLVED IN: drug transmembrane transport, ripening, transmembrane transport; LOCATED IN: plasma membrane, membrane; EXPRESSED IN
A_46_P062106	2.04462	1.9131	1.93514	0080961 Brassica napus Bud library Brassica napus cDNA, mRNA sequence [EV157099]	AT1G67780	Zinc-finger domain of monoamine-oxidase A repressor R1 protein; CONTAINS InterPro DOMAIN/s: DDT domain superfamily (InterPro:IPR018501), DDT domain, subgroup (InterPro:IPR018500), Cell division cycle-associated protein (InterPro:IPR018866); BEST Arabidops
A_46_P083181	4.13892	4.79325	4.77962	0150620 Brassica napus Etiolated seedlings (pSPORT1) Brassica napus cDNA, mRNA sequence [EV179739]	AT2G24090	Ribosomal protein L35; FUNCTIONS IN: structural constituent of ribosome; INVOLVED IN: translation; LOCATED IN: ribosome, chloroplast; EXPRESSED IN: 22 plant structures; EXPRESSED DURING: 13 growth stages; CONTAINS InterPro DOMAIN/s: Ribosomal protein L35,
A_46_P108254	3.56357	3.68786	3.8742	0201515 Brassica napus Undamaged cotyledons Brassica napus cDNA, mRNA sequence [EV187307]	AT1G27460	encodes a calmodulin-binding protein that is expressed in pollen, suspension culture cells, flowers, and fruits.
A_46_P339237	2.38315	3.18533	2.06639
A_46_P340710	2.0492	3.63654	5.89359	Rep: Arabidopsis thaliana genomic DNA, chromosome 3, P1 clone: MOE17 - Arabidopsis thaliana (Mouse-ear cress), partial (96%) [TC193210]
A_46_P042206	2.96459	2.27768	4.1129	BNZB_UP_140_H09_27SEP2005_065 Brassica napus BNZB Brassica napus cDNA 5', mRNA sequence [EE566953]
A_46_P066121	5.36176	3.80709	3.77309	BNSCS2CT_UP_144_D01_23APR2007_009 Brassica napus BNSCS2CT Brassica napus cDNA 5', mRNA sequence [EV026262]
A_46_P198244	442.085	1058.74	1123.3		AT5G13420	Aldolase-type TIM barrel family protein; FUNCTIONS IN: catalytic activity, transaldolase activity; INVOLVED IN: response to cadmium ion; LOCATED IN: mitochondrion, chloroplast stroma, chloroplast; EXPRESSED IN: 25 plant structures; EXPRESSED DURING: 15 gr
A_46_P273558	1.71731	2.24545	1.9117	Rep: DNA-binding family protein / histone H1/H5 family protein - Arabidopsis thaliana, partial (84%) [TC177470]
A_46_P093626	3.4808	2.30141	2.57822	BNQA_UP_052_A09_02OCT2003_079 Brassica napus BNQA Brassica napus cDNA 5', mRNA sequence [EE551368]
A_46_P336390	11.2307	9.83277	10.8585	Rep: F2H15.16 - Arabidopsis thaliana (Mouse-ear cress), partial (46%) [TC190391]	AT1G17940	Endosomal targeting BRO1-like domain-containing protein; FUNCTIONS IN: molecular_function unknown; INVOLVED IN: N-terminal protein myristoylation; LOCATED IN: cellular_component unknown; CONTAINS InterPro DOMAIN/s: BRO1 (InterPro:IPR004328); BEST Arabidop
A_46_P189494	2.98402	3.16529	4.14441		AT1G73700	MATE efflux family protein; FUNCTIONS IN: antiporter activity, drug transmembrane transporter activity, transporter activity; INVOLVED IN: drug transmembrane transport, transmembrane transport; LOCATED IN: membrane; EXPRESSED IN: 8 plant structures; EXPRE
A_46_P213429	2.07882	2.31551	2.73422	Rep: Expressed protein - Arabidopsis thaliana (Mouse-ear cress), partial (36%) [TC176936]
A_46_P290048	302.785	130.146	91.2454	Rep: T32E20.5 - Arabidopsis thaliana (Mouse-ear cress), partial (50%) [TC191842]
A_46_P363400	3.27529	3.30696	5.7444	0153756 Brassica napus Etiolated seedlings (Uni-ZAP) Brassica napus cDNA, mRNA sequence [EV172166]
A_46_P328705	-1.27796	2.00399	1.73981	Rep: Cytochrome P450 like protein - Arabidopsis thaliana (Mouse-ear cress), partial (42%) [TC184826]
A_46_P171864	3.10549	2.21332	2.5456	Rep: Glucose 6-Pi/Pi transporter - Thellungiella halophila (Salt cress), partial (98%) [TC165512]	AT1G61800	glucose6-Phosphate/phosphate transporter 2
A_46_P310845	2.00691	2.07169	2.08094	Rep: T10O24.12 - Arabidopsis thaliana (Mouse-ear cress), partial (37%) [TC167819]	AT1G10510	embryo defective 2004 (emb2004); INVOLVED IN: embryo development ending in seed dormancy; LOCATED IN: mitochondrion, chloroplast, plastid, chloroplast envelope; EXPRESSED IN: 23 plant structures; EXPRESSED DURING: 13 growth stages; BEST Arabidopsis thalia
A_46_P098994	2.85887	1.04319	-1.06885	BNARO2GH_T3_006_G03_15DEC2006_019 Brassica napus BNARO2GH Brassica napus cDNA 5', mRNA sequence [ES909525]	AT2G40270	Protein kinase family protein; FUNCTIONS IN: protein kinase activity, kinase activity, ATP binding; INVOLVED IN: protein amino acid phosphorylation; LOCATED IN: plasma membrane; EXPRESSED IN: 22 plant structures; EXPRESSED DURING: 13 growth stages; CONTAI
A_46_P077781	3.65925	5.14867	5.29711
A_46_P003061	1.17466	2.21705	2.2864	Brassica napus flavonoid 3'-hydroxylase mRNA, complete cds [DQ324379]	AT5G07990	Required for flavonoid 3' hydroxylase activity.
A_46_P170634	1.88854	2.02405	1.99826	Rep: Bet1-like SNARE 1-1 - Arabidopsis thaliana (Mouse-ear cress), complete [TC185329]	AT3G58170	Encodes a Bet1/Sft1-like SNARE protein which fully suppresses the temperature-sensitive growth defect in <i>sft1-1</i> yeast cells; however, it cannot support the deletion of the yeast BET1 gene (<i>bet1&#916;</i>).
A_46_P025891	55.0905	61.4671	39.0126	BNAOV1GH_T3_086_H08_20SPET2007_050 BNAOV1GH Brassica napus cDNA 5', mRNA sequence [GR449312]	AT4G09960	a MADS box transcription factor expressed in the carpel and ovules
A_46_P090211	2.00073	1.76065	1.59652	9RDBNGA_UP_007_D10_25SEP2003_074 Brassica napus - 9RDBNGA Brassica napus cDNA 5', mRNA sequence [EE541663]	AT2G18193	P-loop containing nucleoside triphosphate hydrolases superfamily protein; FUNCTIONS IN: nucleoside-triphosphatase activity, ATPase activity, nucleotide binding, ATP binding; LOCATED IN: endomembrane system; EXPRESSED IN: callus; CONTAINS InterPro DOMAIN/s
A_46_P312415	3.43812	3.14508	3.08326	Rep: At2g31810/F20M17.15 - Arabidopsis thaliana (Mouse-ear cress), partial (88%) [TC169592]	AT2G31810	ACT domain-containing small subunit of acetolactate synthase protein; FUNCTIONS IN: acetolactate synthase activity, amino acid binding; INVOLVED IN: branched chain family amino acid biosynthetic process; LOCATED IN: chloroplast; EXPRESSED IN: 24 plant str
A_46_P193459	106.842	112.335	55.8163		AT2G41710	Integrase-type DNA-binding superfamily protein; FUNCTIONS IN: DNA binding, sequence-specific DNA binding transcription factor activity; INVOLVED IN: regulation of transcription, DNA-dependent; LOCATED IN: nucleus; EXPRESSED IN: 22 plant structures; EXPRES
A_46_P057006	7.74407	5.54949	3.48957	BNARO5GH_T3_014_D07_30NOV2006_057 Brassica napus BNARO5GH Brassica napus cDNA 5', mRNA sequence [ES906505]	AT5G26340	Encodes a protein with high affinity, hexose-specific/H+ symporter activity. The activity of the transporter appears to be negatively regulated by phosphorylation. Importantly, microarray analysis, as well as the study of the expression of this gene in mu
A_46_P359250	2.22556	2.61995	2.85329	Rep: Homeobox protein HD1 - Brassica napus (Rape), partial (34%) [TC203258]	AT1G62990	Encodes a homeodomain transcription factor of the Knotted family. May be involved in secondary cell wall biosynthesis. Mutants have moderately irregular xylem development. Expression of this gene is upregulated by SND1 and MYB46.
A_46_P098914	2.17219	1.73698	2.01014	0119955 Brassica napus Root library Brassica napus cDNA, mRNA sequence [EV114643]	AT3G01420	Encodes an alpha-dioxygenase involved in protection against oxidative stress and cell death. Induced in response to Salicylic acid and oxidative stress. Independent of NPR1 in induction by salicylic acid.
A_46_P104714	1.2077	1.31675	2.19956		AT1G21100	O-methyltransferase family protein; FUNCTIONS IN: methyltransferase activity, O-methyltransferase activity, protein dimerization activity; LOCATED IN: cytosol; EXPRESSED IN: stem, cotyledon, hypocotyl, root, leaf; EXPRESSED DURING: LP.04 four leaves visib
A_46_P177209	3.34001	1.42207	1.78377	Rep: ThiJ-like protein - Brassica rapa subsp. pekinensis (Chinese cabbage), partial (22%) [TC209931]
A_46_P037521	39.0812	38.1052	27.1026	0147009 Brassica napus Etiolated seedlings (pSPORT1) Brassica napus cDNA, mRNA sequence [EV177809]	AT5G16360	NC domain-containing protein-related; CONTAINS InterPro DOMAIN/s: NC (InterPro:IPR007053); BEST Arabidopsis thaliana protein match is: NC domain-containing protein-related (TAIR:AT3G02700.1); Has 1807 Blast hits to 1807 proteins in 277 species: Archae - 0
A_46_P047041	2.10125	1.55594	1.73537	BN24DYSC_UP_015_H04_1FEB2008_018 BN24DYSC Brassica napus cDNA 5', mRNA sequence [FG572132]	AT4G33220	pectin methylesterase 44 (PME44); FUNCTIONS IN: enzyme inhibitor activity, pectinesterase activity; INVOLVED IN: cell wall modification; LOCATED IN: endomembrane system, cell wall, plant-type cell wall; EXPRESSED IN: 22 plant structures; EXPRESSED DURING:
A_46_P164829	2.58431	1.29883	1.25597	0153315 Brassica napus Etiolated seedlings (pSPORT1) Brassica napus cDNA, mRNA sequence [EV181226]	AT2G29150	NAD(P)-binding Rossmann-fold superfamily protein; FUNCTIONS IN: oxidoreductase activity, binding, catalytic activity; INVOLVED IN: oxidation reduction, metabolic process; CONTAINS InterPro DOMAIN/s: Short-chain dehydrogenase/reductase, conserved site (Int
A_46_P141389	3.06093	5.30455	9.77284	Rep: WSSV375 - White spot syndrome virus (WSSV), partial (42%) [TC210530]
A_46_P298990	2.28048	1.7504	2.27989		AT1G80510	Encodes a close relative of the amino acid transporter ANT1 (AT3G11900).
A_46_P327180	2.74208	1.92343	2.25473	Rep: Expressed protein - Arabidopsis thaliana (Mouse-ear cress), complete [TC183677]
A_46_P225030	2.45272	2.34675	2.6577
A_46_P283668	1.7386	2.14069	1.99571		AT4G31310	AIG2-like (avirulence induced gene) family protein; CONTAINS InterPro DOMAIN/s: Butirosin biosynthesis, BtrG-like (InterPro:IPR013024), AIG2-like (InterPro:IPR009288); BEST Arabidopsis thaliana protein match is: AIG2-like (avirulence induced gene) family
A_46_P091711	5.36289	4.98162	4.17438	24RDBNH_T3_112_H06_22SEP2006_034 Brassica napus 24RDBNH Brassica napus cDNA 5', mRNA sequence [ES915601]	AT1G10095	Protein prenylyltransferase superfamily protein; FUNCTIONS IN: protein prenyltransferase activity; INVOLVED IN: protein amino acid prenylation; LOCATED IN: cellular_component unknown; CONTAINS InterPro DOMAIN/s: Protein prenyltransferase (InterPro:IPR0089
A_46_P272848	2.51572	1.88095	2.26483	BNSCS3CT_UP_029_D04_11JAN2005_026 Brassica napus seed coat BNSCS3CT Brassica napus cDNA 5', mRNA sequence [EE467156]
A_46_P155449	2.75515	1.74745	2.12433
A_46_P381848	2.06682	1.1824	1.05884	Rep: Chromosome chr14 scaffold_21, whole genome shotgun sequence - Vitis vinifera (Grape), partial (12%) [TC212916]
A_46_P293203	2.33135	2.40539	3.04711		AT4G32470	Cytochrome bd ubiquinol oxidase, 14kDa subunit; FUNCTIONS IN: ubiquinol-cytochrome-c reductase activity; INVOLVED IN: mitochondrial electron transport, ubiquinol to cytochrome c; LOCATED IN: mitochondrion, plasma membrane, plastid, mitochondrial respirato
A_46_P317215	69.3506	50.0318	33.3781	Rep: Potassium channel AKT1 - Arabidopsis thaliana (Mouse-ear cress), partial (18%) [TC174607]	AT2G26650	Encodes AKT1, a member of the Shaker family inward rectifying potassium channel predominantly expressed in predominantly in root hairs and root endodermis. This family includes five groups based on phylogenetic analysis (FEBS Letters (2007) 581: 2357): I
A_46_P013516	2.37608	1.86746	1.85187	JKBNHS1_UP_011_C10_02JUL2004_076 Brassica napus JKBNHS1 Brassica napus cDNA 5', mRNA sequence [CX281712]	AT5G46330	Encodes a leucine-rich repeat serine/threonine protein kinase that is expressed ubiquitously. FLS2 is involved in MAP kinase signalling relay involved in innate immunity. Essential in the perception of flagellin, a potent elicitor of the defense response.
A_46_P089551	9.94757	10.7907	11.9007	26RDBNT_UP_046_E05_16FEB2004_039 Brassica napus 26RDBNT Brassica napus cDNA 5', mRNA sequence [EE514161]
A_46_P112849	2.13534	2.04111	2.20082	0194142 Brassica napus Apical meristem Brassica napus cDNA, mRNA sequence [EV096123]
A_46_P301255	27.59	17.4868	17.4831
A_46_P330370	2.3015	2.72627	4.10118	Rep: Chromosome chr18 scaffold_59, whole genome shotgun sequence - Vitis vinifera (Grape), partial (48%) [TC186059]	AT4G09830	Uncharacterised conserved protein UCP009193; CONTAINS InterPro DOMAIN/s: Uncharacterised conserved protein UCP009193 (InterPro:IPR016549); BEST Arabidopsis thaliana protein match is: Uncharacterised conserved protein UCP009193 (TAIR:AT5G64780.1); Has 86 B
A_46_P336805	2.52852	2.62651	2.61576	Rep: Chromosome chr4 scaffold_333, whole genome shotgun sequence - Vitis vinifera (Grape), partial (28%) [TC190624]	AT4G35870	early-responsive to dehydration stress protein (ERD4); FUNCTIONS IN: molecular_function unknown; INVOLVED IN: protein targeting to vacuole; LOCATED IN: membrane; EXPRESSED IN: 23 plant structures; EXPRESSED DURING: 15 growth stages; CONTAINS InterPro DOMA
A_46_P355800	3.06684	2.82924	2.60839	Rep: Proteasome subunit beta type-6 precursor - Arabidopsis thaliana (Mouse-ear cress), partial (56%) [TC201647]
A_46_P383283	2.17317	1.94406	4.16213	9RDBNGA_UP_034_D04_03DEC2003_026 Brassica napus 9RDBNGA Brassica napus cDNA 5', mRNA sequence [ES950637]	AT3G26700	Protein kinase superfamily protein; FUNCTIONS IN: protein serine/threonine kinase activity, protein kinase activity, kinase activity, ATP binding; INVOLVED IN: protein amino acid phosphorylation; LOCATED IN: plasma membrane; EXPRESSED IN: 23 plant structu
A_46_P217684	2.98854	1.32387	2.32198	24RDBNH_UP_034_C11_20FEB2004_091 Brassica napus 24RDBNH Brassica napus cDNA 5', mRNA sequence [EE506446]	AT5G56360	Encodes PSL4, beat-subunit of endoplasmic reticulum-resident glucosidase II, which is essential for stable accumulation and quality control of the elf18 receptor EFR but not the flg22 receptor FLS2.
A_46_P182039	10.6477	11.961	13.2277	Rep: Vacuolar ATP synthase 16 kDa proteolipid subunit 1/3/5 - Arabidopsis thaliana (Mouse-ear cress), complete [TC166918]	AT4G38920	vacuolar-type H(+)-ATPase C3 (VHA-C3); FUNCTIONS IN: ATPase activity; INVOLVED IN: ATP synthesis coupled proton transport; LOCATED IN: vacuole; EXPRESSED IN: 24 plant structures; EXPRESSED DURING: 15 growth stages; CONTAINS InterPro DOMAIN/s: ATPase, F0/V
A_46_P281308	2.44966	2.32183	1.88196		AT3G19570	Encodes SCO3 (snowy cotyledon3), a member of a largely uncharacterized protein family unique to the plant kingdom. The sco3-1 mutation alters chloroplast morphology and development, reduces chlorophyll accumulation, impairs thylakoid formation and photosy
A_46_P034876	9.86506	13.4837	11.3323	BNSCS3CT_UP_084_D08_05MAY2007_058 Brassica napus BNSCS3CT Brassica napus cDNA 5', mRNA sequence [EV043150]	AT2G34360	MATE efflux family protein; FUNCTIONS IN: antiporter activity, drug transmembrane transporter activity, transporter activity; INVOLVED IN: drug transmembrane transport, transmembrane transport; LOCATED IN: membrane; EXPRESSED IN: stem, inflorescence meris
A_46_P363005	6.73207	-1.22113	1.01846	Rep: Phytochelatin synthase 1 - Arabidopsis halleri, partial (11%) [TC205023]	AT5G44070	Phytochelatin synthase gene confers tolerance to cadmium ions. Catalyzes phytochelatin (PC) synthesis from glutathione (GSH) in the presence of Cd2+, Zn2+, Cu2+ and Fe3+, but not by Co2+ or Ni2+.
A_46_P243089	2.37777	1.87377	1.91173	Rep: Separation anxiety protein-like - Arabidopsis thaliana (Mouse-ear cress), complete [TC171091]	AT5G11340	Acyl-CoA N-acyltransferases (NAT) superfamily protein; FUNCTIONS IN: N-acetyltransferase activity; INVOLVED IN: metabolic process; LOCATED IN: cellular_component unknown; EXPRESSED IN: 23 plant structures; EXPRESSED DURING: 15 growth stages; CONTAINS Inte
A_46_P091106	1.50355	1.61789	2.75188	9RDBNGA_UP_043_E09_05DEC2003_071 Brassica napus - 9RDBNGA Brassica napus cDNA 5', mRNA sequence [EE543759]
A_46_P367230	2.89136	1.062	-1.62291	Rep: Cysteine-rich receptor-like protein kinase 24 precursor - Arabidopsis thaliana (Mouse-ear cress), partial (58%) [TC206849]	AT4G23320	Encodes a cysteine-rich receptor-like protein kinase.
A_46_P213164	1.93957	1.82827	2.14766
A_46_P314135	1.95765	1.15092	2.96992	Rep: MYB transcription factor - Arabidopsis thaliana (Mouse-ear cress), partial (74%) [TC171471]	AT3G09600	Encodes a MYB-like transcription factor similar to CIRCADIAN CLOCK-ASSOCIATED1 (CCA1) and ELONGATED HYPOCOTYL (LHY). Involved in the regulation of circadian clock by modulating the pattern of histone 3 (H3) acetylation.
A_46_P270488	2.71627	2.80786	5.63618		AT3G20510	Transmembrane proteins 14C; CONTAINS InterPro DOMAIN/s: Uncharacterised protein family UPF0136, Transmembrane (InterPro:IPR005349); BEST Arabidopsis thaliana protein match is: Transmembrane proteins 14C (TAIR:AT1G50740.1); Has 449 Blast hits to 449 protei
A_46_P035266	2.604	2.2178	2.4492	0104663 Brassica napus Cold acclimation - light Brassica napus cDNA, mRNA sequence [EV203510]
A_46_P258554	9.93825	8.39459	7.68882	Rep: ACI14 - Solanum lycopersicum (Tomato) (Lycopersicon esculentum), partial (96%) [TC163571]	AT3G09970	Calcineurin-like metallo-phosphoesterase superfamily protein; FUNCTIONS IN: hydrolase activity, protein serine/threonine phosphatase activity; INVOLVED IN: biological_process unknown; LOCATED IN: cellular_component unknown; EXPRESSED IN: 23 plant structur
A_46_P141394	13.2986	21.6855	39.0731
A_46_P252909	2.54061	1.98825	3.48941	Rep: MRNA, complete cds, clone: RAFL21-57-G12 - Arabidopsis thaliana (Mouse-ear cress), partial (12%) [TC209760]	AT5G19920	Transducin/WD40 repeat-like superfamily protein; CONTAINS InterPro DOMAIN/s: WD40 repeat-like-containing domain (InterPro:IPR011046), WD40 repeat 2 (InterPro:IPR019782), WD40-repeat-containing domain (InterPro:IPR017986), WD40 repeat (InterPro:IPR001680),
A_46_P098654	17.5582	12.5691	7.79446	BNARO2GH_T3_013_D11_15DEC2006_089 Brassica napus BNARO2GH Brassica napus cDNA 5', mRNA sequence [ES911743]
A_46_P192094	2.57626	2.07565	1.7996	Rep: Chromosome chr2 scaffold_132, whole genome shotgun sequence - Vitis vinifera (Grape), partial (92%) [TC175637]	AT5G53160	Encodes RCAR3, a regulatory component of ABA receptor. Interacts with protein phosphatase 2Cs ABI1 and ABI2. Stimulates ABA signaling.
A_46_P226309	8.14103	2.433	1.87745		AT3G57350	Nucleoporin interacting component (Nup93/Nic96-like) family protein; FUNCTIONS IN: molecular_function unknown; INVOLVED IN: transport; LOCATED IN: nuclear pore; CONTAINS InterPro DOMAIN/s: Nucleoporin interacting component Nup93/Nic96 (InterPro:IPR007231)
A_46_P098374	2.23082	3.05629	2.21469	BNZB_UP_154_G10_27SEP2005_068 Brassica napus BNZB Brassica napus cDNA 5', mRNA sequence [EE567832]	AT5G03430	phosphoadenosine phosphosulfate (PAPS) reductase family protein; FUNCTIONS IN: transferase activity; INVOLVED IN: Mo-molybdopterin cofactor biosynthetic process, metabolic process; LOCATED IN: cellular_component unknown; EXPRESSED IN: 22 plant structures;
A_46_P194559	3.92169	3.36825	3.52842	Rep: T9A4.6 protein - Arabidopsis thaliana (Mouse-ear cress), partial (87%) [TC173438]	AT4G10265	Wound-responsive family protein; CONTAINS InterPro DOMAIN/s: Protein of unknown function wound-induced (InterPro:IPR022251); BEST Arabidopsis thaliana protein match is: Wound-responsive family protein (TAIR:AT4G10270.1); Has 164 Blast hits to 163 proteins
A_46_P334420	2.22736	1.73777	1.70516	0194865 Brassica napus Stem library Brassica napus cDNA, mRNA sequence [EV126985]	AT4G39900	unknown protein; Has 30201 Blast hits to 17322 proteins in 780 species: Archae - 12; Bacteria - 1396; Metazoa - 17338; Fungi - 3422; Plants - 5037; Viruses - 0; Other Eukaryotes - 2996 (source: NCBI BLink).
A_46_P272683	1.9713	2.02988	1.7845		AT1G68570	Major facilitator superfamily protein; FUNCTIONS IN: transporter activity; INVOLVED IN: oligopeptide transport; LOCATED IN: membrane; EXPRESSED IN: 23 plant structures; EXPRESSED DURING: 13 growth stages; CONTAINS InterPro DOMAIN/s: Oligopeptide transport
A_46_P081026	2.59608	-2.1913	-2.72021	59ACAB6_UP_029_E07_27JUL2004_055 Brassica napus 59ACAB6 Brassica napus cDNA 5', mRNA sequence [EE422055]	AT3G25882	encodes a kinase that physically interacts with NPR1/NIM1
A_46_P197709	2.10296	2.0877	1.97352		AT5G23890	LOCATED IN: mitochondrion, chloroplast thylakoid membrane, chloroplast, plastid, chloroplast envelope; EXPRESSED IN: 24 plant structures; EXPRESSED DURING: 14 growth stages; CONTAINS InterPro DOMAIN/s: S-layer homology domain (InterPro:IPR001119); BEST Ar
A_46_P082256	4.21104	4.92291	2.71265	0096396 Brassica napus Bud library Brassica napus cDNA, mRNA sequence [EV153125]	AT2G37080	Encodes RIP3 (ROP interactive partner 3), a Rho protein effector, interacting specifically with the active form of ROPs (Rho proteins of plants). RIP3 is localized at microtubules and interacts with the kinesin-13 family member AtKinesin-13A, suggesting a
A_46_P023921	3.11666	4.04942	2.36382	BNZB_UP_066_E10_14MAY2004_072 Brassica napus BNZB Brassica napus cDNA 5', mRNA sequence [EE561126]	AT5G54580	RNA-binding (RRM/RBD/RNP motifs) family protein; FUNCTIONS IN: RNA binding, nucleotide binding, nucleic acid binding; INVOLVED IN: biological_process unknown; EXPRESSED IN: 22 plant structures; EXPRESSED DURING: 13 growth stages; CONTAINS InterPro DOMAIN/
A_46_P169714	2.31675	2.04811	2.76403		AT3G02515	Member of Sadhu non-coding retrotransposon family
A_46_P029676	2.10598	1.95821	2.07957	BNZB_RP_010_A11_23APR2004_095 Brassica napus BNZB Brassica napus cDNA 5', mRNA sequence [EE556997]	AT1G76760	Encodes a y-type thioredoxin (Trx-y1) localized in chloroplast stroma.
A_46_P087951	1.60951	1.88369	2.0204	0143022 Brassica napus Etiolated seedlings (Uni-ZAP) Brassica napus cDNA, mRNA sequence [EV166212]	AT1G74950	TIFY10B; CONTAINS InterPro DOMAIN/s: Tify (InterPro:IPR010399), CCT domain-like (InterPro:IPR018467); BEST Arabidopsis thaliana protein match is: jasmonate-zim-domain protein 1 (TAIR:AT1G19180.1); Has 432 Blast hits to 427 proteins in 29 species: Archae -
A_46_P124589	-1.81186	1.48278	2.80573	0149637 Brassica napus Etiolated seedlings (pSPORT1) Brassica napus cDNA, mRNA sequence [EV179247]	AT3G16660	Pollen Ole e 1 allergen and extensin family protein; FUNCTIONS IN: molecular_function unknown; INVOLVED IN: biological_process unknown; LOCATED IN: endomembrane system; CONTAINS InterPro DOMAIN/s: Pollen Ole e 1 allergen/extensin (InterPro:IPR006041); BES
A_46_P376250	283.441	560.06	1033.66
A_46_P343540	1.40721	2.02234	1.59616	Rep: transcription regulator - Arabidopsis thaliana, partial (17%) [TC194937]	AT3G04930	DNA-binding storekeeper protein-related transcriptional regulator; CONTAINS InterPro DOMAIN/s: Protein of unknown function DUF573 (InterPro:IPR007592); BEST Arabidopsis thaliana protein match is: DNA-binding storekeeper protein-related transcriptional reg
A_46_P306095	2.86182	2.43261	2.03991		AT2G03590	Encodes a member of a class of allantoin transporters.
A_46_P366970	2.40456	3.42177	2.79805	Rep: Similarity to non-LTR retroelement reverse transcriptase - Arabidopsis thaliana (Mouse-ear cress), partial (13%) [TC206732]
A_46_P072041	-1.15651	2.12008	1.04614	BN18DYSC_UP_081_F02_4MAR2008_006 BN18DYSC Brassica napus cDNA 5', mRNA sequence [FG560044]	AT1G36980	unknown protein; CONTAINS InterPro DOMAIN/s: Uncharacterised protein family UPF0220 (InterPro:IPR007919); Has 424 Blast hits to 424 proteins in 159 species: Archae - 0; Bacteria - 0; Metazoa - 228; Fungi - 120; Plants - 62; Viruses - 0; Other Eukaryotes -
A_46_P139354	4.55736	4.7714	4.89336	Rep: Chaperone protein dnaJ 3 - Arabidopsis thaliana (Mouse-ear cress), complete [TC163898]	AT5G22060	Co-chaperonin similar to E. coli DnaJ
A_46_P251199	7.70583	-1.75528	-2.46926
A_46_P155454	1.97278	1.98086	2.02628	Rep: Arabidopsis thaliana genomic DNA, chromosome 3, P1 clone: MQC3 - Arabidopsis thaliana (Mouse-ear cress), complete [TC171914]	AT3G12260	LYR family of Fe/S cluster biogenesis protein; FUNCTIONS IN: catalytic activity; LOCATED IN: mitochondrion, respiratory chain complex I, membrane; EXPRESSED IN: 23 plant structures; EXPRESSED DURING: 14 growth stages; Has 252 Blast hits to 252 proteins in
A_46_P293303	8.13585	9.04099	9.23801
A_46_P116364	3.74056	2.9301	3.9444	0153454 Brassica napus Etiolated seedlings (Uni-ZAP) Brassica napus cDNA, mRNA sequence [EV172020]	AT1G54040	Epithiospecifier protein, interacts with WRKY53. Involved in pathogen resistance and leaf senescence.
A_46_P255404	2.84278	2.26326	2.17949		AT5G28673	transposable element gene; hAT-like transposase family (hobo/Ac/Tam3), has a 2.1e-40 P-value blast match to GB:CAA29005 ORFa of Maize Ac (hAT-element) (Zea mays)
A_46_P384063	1.52593	2.04081	2.27605	Rep: Auxin reponsive-like protein - Arabidopsis thaliana (Mouse-ear cress), partial (58%) [TC213879]	AT5G13370	Auxin-responsive GH3 family protein; CONTAINS InterPro DOMAIN/s: GH3 auxin-responsive promoter (InterPro:IPR004993); BEST Arabidopsis thaliana protein match is: Auxin-responsive GH3 family protein (TAIR:AT5G13360.3); Has 1602 Blast hits to 1450 proteins i
A_46_P223619	2.64562	-1.00389	1.71085	Rep: Serine protease inhibitor-like protein - Oryza sativa subsp. japonica (Rice), partial (26%) [TC182042]	AT3G61980	serine protease inhibitor, Kazal-type family protein; FUNCTIONS IN: serine-type endopeptidase inhibitor activity; INVOLVED IN: biological_process unknown; LOCATED IN: plasma membrane, anchored to membrane; EXPRESSED IN: 24 plant structures; EXPRESSED DURI
A_46_P059106	2.39811	1.85097	2.44731	65JKBNM0_T3_014_H10_17MAR2005_066 Brassica napus Normalized library CoT5 65JKBNM0 Brassica napus cDNA 5', mRNA sequence [EL587911]	AT3G48610	non-specific phospholipase C6 (NPC6); FUNCTIONS IN: hydrolase activity, acting on ester bonds; LOCATED IN: endomembrane system; EXPRESSED IN: 22 plant structures; EXPRESSED DURING: 13 growth stages; CONTAINS InterPro DOMAIN/s: Phosphoesterase (InterPro:IP
A_46_P264208	2.18418	2.31285	2.22137
A_46_P324110	1.75598	1.74562	2.10345	Rep: Transaldolase-like protein - Arabidopsis thaliana (Mouse-ear cress), partial (44%) [TC181155]	AT5G13420	Aldolase-type TIM barrel family protein; FUNCTIONS IN: catalytic activity, transaldolase activity; INVOLVED IN: response to cadmium ion; LOCATED IN: mitochondrion, chloroplast stroma, chloroplast; EXPRESSED IN: 25 plant structures; EXPRESSED DURING: 15 gr
A_46_P151479	249.986	204.358	330.8		AT5G27120	SAR DNA-binding protein, putative, strong similarity to SAR DNA-binding protein-1 (Pisum sativum) GI:3132696; contains Pfam profile PF01798: Putative snoRNA binding domain; has similarity to MAR binding NOP58 protein
A_46_P354475	160.194	72.0666	37.3276	Rep: Copper chaperone - Populus alba x Populus tremula var. glandulosa, partial (81%) [TC200975]	AT1G66240	homolog of anti-oxidant 1 (ATX1); FUNCTIONS IN: metal ion binding; INVOLVED IN: metal ion transport; LOCATED IN: endomembrane system; EXPRESSED IN: 22 plant structures; EXPRESSED DURING: 13 growth stages; CONTAINS InterPro DOMAIN/s: Heavy metal transport/
A_46_P041876	4.8232	3.18336	3.93576	0149479 Brassica napus Etiolated seedlings (pSPORT1) Brassica napus cDNA, mRNA sequence [EV179127]	AT2G44790	Encodes a uclacyanin, a protein precursor that is closely related to precursors of stellacyanins and a blue copper protein from pea pods.
A_46_P220544	2.01514	1.01405	1.23186	0148230 Brassica napus Etiolated seedlings (pSPORT1) Brassica napus cDNA, mRNA sequence [EV178474]	AT3G13110	Encodes a mitochondrial serine O-acetyltransferase involved in sulfur assimilation and cysteine biosynthesis. Expressed in the vascular system.
A_46_P043206	2.95715	-1.33229	-1.28354	BNDH4DCT_UP_012_B11_16DEC2004_093 Brassica napus seeds BNDH4DCT Brassica napus cDNA 5', mRNA sequence [DY005877]
A_46_P083966	2.12106	2.84468	2.74105	BNARO6GH_T3_029_H11_08DEC2006_081 Brassica napus BNARO6GH Brassica napus cDNA 5', mRNA sequence [ES913001]
A_46_P325090	2.08419	1.25194	1.37277	Rep: Uncharacterized protein At5g15500.1 - Arabidopsis thaliana (Mouse-ear cress), partial (9%) [TC181945]
A_46_P316795	2.39978	2.51565	2.62106	Rep: Chromosome chr18 scaffold_24, whole genome shotgun sequence - Vitis vinifera (Grape), partial (59%) [TC174180]	AT4G10030	alpha/beta-Hydrolases superfamily protein; FUNCTIONS IN: hydrolase activity; LOCATED IN: chloroplast; EXPRESSED IN: 23 plant structures; EXPRESSED DURING: 13 growth stages; CONTAINS InterPro DOMAIN/s: Alpha/beta hydrolase fold-1 (InterPro:IPR000073); BEST
A_46_P267948	4.08051	1.68216	1.37381	Rep: Nudix hydrolase 17, mitochondrial precursor - Arabidopsis thaliana (Mouse-ear cress), complete [TC211199]	AT2G01670	nudix hydrolase homolog 17 (NUDT17); FUNCTIONS IN: hydrolase activity; INVOLVED IN: biological_process unknown; EXPRESSED IN: 23 plant structures; EXPRESSED DURING: 15 growth stages; CONTAINS InterPro DOMAIN/s: NUDIX hydrolase domain-like (InterPro:IPR015
A_46_P134954	3.53594	3.97697	3.733
A_46_P158094	3.36658	3.77833	3.86397	Rep: Nuclear movement protein-like - Oryza sativa subsp. japonica (Rice), complete [TC169733]	AT5G58740	HSP20-like chaperones superfamily protein; CONTAINS InterPro DOMAIN/s: CS-like domain (InterPro:IPR007052), HSP20-like chaperone (InterPro:IPR008978), CS domain (InterPro:IPR017447); BEST Arabidopsis thaliana protein match is: HSP20-like chaperones superf
A_46_P130009	5.27071	5.72711	10.466	BNSCS2CT_UP_296_F06_25MAY2007_038 Brassica napus BNSCS2CT Brassica napus cDNA 5', mRNA sequence [EV037279]	AT1G63420	CONTAINS InterPro DOMAIN/s: Lipopolysaccharide-modifying protein (InterPro:IPR006598), Protein of unknown function DUF821, CAP10-like (InterPro:IPR008539); BEST Arabidopsis thaliana protein match is: Arabidopsis thaliana protein of unknown function (DUF82
A_46_P054286	2.49831	2.57975	2.11447	0089633 Brassica napus Cold acclimation - dark Brassica napus cDNA, mRNA sequence [EV192152]	AT5G17700	MATE efflux family protein; FUNCTIONS IN: antiporter activity, drug transmembrane transporter activity, transporter activity; INVOLVED IN: drug transmembrane transport, transmembrane transport; LOCATED IN: membrane; EXPRESSED IN: 22 plant structures; EXPR
A_46_P133899	2.29511	2.27232	2.21187
A_46_P366155	2.78456	1.4176	1.61589	Rep: T8K14.1 protein - Arabidopsis thaliana (Mouse-ear cress), partial (9%) [TC206393]	AT1G79570	Protein kinase superfamily protein with octicosapeptide/Phox/Bem1p domain; FUNCTIONS IN: protein serine/threonine/tyrosine kinase activity, protein kinase activity; INVOLVED IN: protein amino acid phosphorylation; LOCATED IN: cytosol; EXPRESSED IN: male g
A_46_P152874	1.68285	1.74694	2.40856	Rep: Isoform 2 of Q96FL8 - Homo sapiens (Human), partial (6%) [TC196198]	AT4G27060	Encodes a novel, plant-specific microtubule-associated protein that regulates the orientation of cortical microtubules and the direction of organ growth. The protein plays a role in control of microtubule dependent anisotropic cell elongation. spr2 mutan
A_46_P187934	99.6063	72.6982	41.8555		AT1G10400	UDP-Glycosyltransferase superfamily protein; FUNCTIONS IN: UDP-glycosyltransferase activity, transferase activity, transferring glycosyl groups; INVOLVED IN: metabolic process; LOCATED IN: endomembrane system; EXPRESSED IN: root; CONTAINS InterPro DOMAIN/
A_46_P010726	2.00757	2.19523	2.70879
A_46_P355030	6.89874	5.87105	5.03569	Rep: Predicted protein - Monosiga brevicollis MX1, partial (3%) [TC201238]	AT1G20220	Alba DNA/RNA-binding protein; FUNCTIONS IN: nucleic acid binding; INVOLVED IN: biological_process unknown; LOCATED IN: plant-type cell wall; EXPRESSED IN: 25 plant structures; EXPRESSED DURING: 15 growth stages; CONTAINS InterPro DOMAIN/s: Alba, DNA/RNA-b
A_46_P266973	35.8047	52.5969	137.809	Rep: At1g11580 - Arabidopsis thaliana (Mouse-ear cress), partial (40%) [TC202250]	AT1G11580	methylesterase PCR A (PMEPCRA); FUNCTIONS IN: enzyme inhibitor activity, pectinesterase activity; INVOLVED IN: cell wall modification; LOCATED IN: cell wall, plasma membrane, plant-type cell wall; EXPRESSED IN: 25 plant structures; EXPRESSED DURING: 13 gr
A_46_P181064	2.16808	1.8914	1.64881	Rep: Polyol transporter 5 - Arabidopsis thaliana (Mouse-ear cress), partial (83%) [TC178648]	AT2G16120	polyol/monosaccharide transporter 1 (PMT1); CONTAINS InterPro DOMAIN/s: Sugar transporter, conserved site (InterPro:IPR005829), Major facilitator superfamily (InterPro:IPR020846), General substrate transporter (InterPro:IPR005828), Sugar/inositol transpor
A_46_P320600	18.326	2.32567	4.35601	Rep: Chromosome chr6 scaffold_3, whole genome shotgun sequence - Vitis vinifera (Grape), partial (69%) [TC178020]	AT5G58260	Encodes subunit NDH-N of NAD(P)H:plastoquinone dehydrogenase complex (Ndh complex) present in the thylakoid membrane of chloroplasts. This subunit is thought to be required for Ndh complex assembly.
A_46_P272473	2.18848	1.95398	1.49569		AT3G24340	chromatin remodeling 40 (chr40); FUNCTIONS IN: helicase activity, DNA binding, ATP binding, nucleic acid binding; EXPRESSED IN: 13 plant structures; EXPRESSED DURING: 7 growth stages; CONTAINS InterPro DOMAIN/s: DEAD-like helicase, N-terminal (InterPro:IP
A_46_P150359	2.08512	2.21969	2.10528	Rep: Probable 2,3-bisphosphoglycerate-independent phosphoglycerate mutase 2 - Arabidopsis thaliana (Mouse-ear cress), complete [TC186791]
A_46_P186144	2.0548	1.67582	1.783	Rep: Probable plastid-lipid-associated protein 9, chloroplast precursor - Arabidopsis thaliana (Mouse-ear cress), partial (92%) [TC172438]	AT3G58010	plastoglobulin 34kD (PGL34); FUNCTIONS IN: structural molecule activity; INVOLVED IN: biological_process unknown; LOCATED IN: thylakoid, thylakoid lumen, chloroplast thylakoid membrane, chloroplast, plastoglobule; EXPRESSED IN: 22 plant structures; EXPRES
A_46_P203995	2.0008	-1.05832	1.18859	Rep: 5-methyltetrahydropteroyltriglutamate--homocysteine methyltransferase - Arabidopsis thaliana (Mouse-ear cress), partial (33%) [TC171869]
A_46_P193894	2.58367	2.66017	2.30934
A_46_P234649	2.2468	4.80148	2.40386		AT4G00040	Chalcone and stilbene synthase family protein; FUNCTIONS IN: transferase activity, transferring acyl groups other than amino-acyl groups, catalytic activity, acyltransferase activity; INVOLVED IN: phenylpropanoid biosynthetic process, biosynthetic process
A_46_P180454	2.63488	2.89851	2.56374	Rep: NADH ubiquinone oxidoreductase subunit - Arabidopsis thaliana (Mouse-ear cress), complete [TC179775]	AT3G03070	NADH-ubiquinone oxidoreductase-related; CONTAINS InterPro DOMAIN/s: Zinc finger, CHCC-type (InterPro:IPR019401), NADH dehydrogenase [ubiquinone] (complex I), iron-sulphur protein 6, mitochondria (InterPro:IPR016668); Has 288 Blast hits to 288 proteins in
A_46_P352330	1.83798	2.12154	2.33023	Rep: L-galactose dehydrogenase - Vitis vinifera (Grape), partial (50%) [TC199905]	AT4G33670	Encodes a L-galactose dehydrogenase, involved in ascorbate biosynthesis
A_46_P090846	6.57434	6.6431	7.1336	BNARO2GH_T3_011_C02_15DEC2006_012 Brassica napus BNARO2GH Brassica napus cDNA 5', mRNA sequence [ES911533]	AT5G53160	Encodes RCAR3, a regulatory component of ABA receptor. Interacts with protein phosphatase 2Cs ABI1 and ABI2. Stimulates ABA signaling.
A_46_P051891	1.59265	1.8564	2.02603	0178436 Brassica napus Leaf library Brassica napus cDNA, mRNA sequence [EV098924]	AT5G67420	Encodes a LOB-domain protein involved in nitrogen metabolism and affecting leaf morphogenesis.
A_46_P118594	2.16302	2.06396	1.91848	0169941 Brassica napus Flower Brassica napus cDNA, mRNA sequence [EV134815]	AT5G05450	P-loop containing nucleoside triphosphate hydrolases superfamily protein; FUNCTIONS IN: helicase activity, nucleic acid binding, ATP-dependent helicase activity, ATP binding; INVOLVED IN: biological_process unknown; LOCATED IN: cellular_component unknown;
A_46_P229194	1.911	1.98255	2.82179	Rep: Actin-2 - Arabidopsis thaliana (Mouse-ear cress), partial (59%) [TC176998]	AT3G18780	Encodes an actin that is constitutively expressed in vegetative structures but not pollen. ACT2 is involved in tip growth of root hairs.
A_46_P167979	20.0847	14.3924	20.1756	Rep: Chromosome chr16 scaffold_10, whole genome shotgun sequence - Vitis vinifera (Grape), partial (56%) [TC165511]	AT5G17560	BolA-like family protein; FUNCTIONS IN: transcription regulator activity; INVOLVED IN: biological_process unknown; LOCATED IN: chloroplast; EXPRESSED IN: 22 plant structures; EXPRESSED DURING: 13 growth stages; CONTAINS InterPro DOMAIN/s: BolA-like protei
A_46_P364105	1.81337	1.62921	2.13594	Rep: Ribosomal protein L36 - Vitis vinifera (Grape), partial (46%) [TC205520]
A_46_P191884	2.54393	1.66145	1.74528	AAF23278.1 - Arabidopsis thaliana (Mouse-ear cress), complete [TC206865]	AT3G12587	Oligosaccaryltransferase; FUNCTIONS IN: molecular_function unknown; INVOLVED IN: biological_process unknown; LOCATED IN: endomembrane system; CONTAINS InterPro DOMAIN/s: Oligosaccaryltransferase (InterPro:IPR018943); BEST Arabidopsis thaliana protein matc
A_46_P155239	8.98577	9.83397	9.95212	0160085 Brassica napus Etiolated seedlings (pSPORT1) Brassica napus cDNA, mRNA sequence [EV185040]	AT4G38495	CONTAINS InterPro DOMAIN/s: YL1 nuclear, C-terminal (InterPro:IPR013272); Has 279 Blast hits to 279 proteins in 147 species: Archae - 0; Bacteria - 0; Metazoa - 94; Fungi - 133; Plants - 35; Viruses - 0; Other Eukaryotes - 17 (source: NCBI BLink).
A_46_P203829	2.29562	1.65166	1.18503	Rep: Vacuolar-processing enzyme gamma-isozyme precursor - Arabidopsis thaliana (Mouse-ear cress), partial (29%) [TC183199]	AT4G32940	Encodes a vacuolar processing enzyme belonging to a novel group of cysteine proteinases that is expressed in vegetative organs and is upregulated in association with various types of cell death and under stressed conditions. They are essential in processi
A_46_P362445	20.7814	31.346	32.1352	Rep: Eukaryotic translation initiation factor 2 subunit 3 - Homo sapiens (Human), partial (29%) [TC204753]	AT1G04170	protein synthesis initiation factor eIF2 gamma
A_46_P110814	3.04411	3.32576	2.92657	0103288 Brassica napus Cold acclimation - light Brassica napus cDNA, mRNA sequence [EV202135]	AT3G27010	Belongs to a TCP protein transcription factor family. Members of this family contain a predicted basic-helix-loop-helix domain involved in DNA binding. Related to rice PCF1 and PCF2 genes. Binds to the GCCCR element of CYCB1;1. Involved in regulation of e
A_46_P338815	-1.93426	2.2608	1.62552	Rep: Extensin-like protein - Solanum lycopersicum (Tomato) (Lycopersicon esculentum), partial (25%) [TC192033]	AT2G15880	Leucine-rich repeat (LRR) family protein; FUNCTIONS IN: structural constituent of cell wall; LOCATED IN: endomembrane system; EXPRESSED IN: 15 plant structures; EXPRESSED DURING: 8 growth stages; CONTAINS InterPro DOMAIN/s: Leucine-rich repeat (InterPro:I
A_46_P147364	2.41591	1.95407	2.17932	Rep: Betaine-aldehyde dehydrogenase - Chorispora bungeana (Blue mustard), complete [TC165860]
A_46_P186474	554.955	572.965	339.534
A_46_P238984	73.3697	6.81692	8.3675	Rep: Reversal of tor2 lethality - Pichia stipitis CBS 6054, partial (7%) [TC187181]
A_46_P068376	2.10878	2.3018	2.07392	0130592 Brassica napus Root library Brassica napus cDNA, mRNA sequence [EV125280]
A_46_P322880	2.43671	1.92671	1.31949	Rep: RCH2 protein - Brassica napus (Rape), partial (43%) [TC180098]	AT1G12110	Encodes NRT1.1 (CHL1), a dual-affinity nitrate transporter. The protein is expressed in guard cells and function in stomatal opening. Mutants have less transpiration and are more tolerant to drought. Expressed in lateral roots. Involved in nitrate signali
A_46_P166449	1.04845	3.10801	2.48537	Rep: Probable branched-chain-amino-acid aminotransferase 4 - Arabidopsis thaliana (Mouse-ear cress), partial (90%) [TC170012]	AT3G19710	Belongs to the branched-chain amino acid aminotransferase gene family. Encodes a methionine-oxo-acid transaminase. Involved in the methionine chain elongation pathway that leads to the ultimate biosynthesis of methionine-derived glucosinolates.
A_46_P226279	5.53642	5.44905	4.98276	Rep: Chromosome chr13 scaffold_17, whole genome shotgun sequence - Vitis vinifera (Grape), partial (57%) [TC196258]	AT3G55530	Encodes an intracellular membrane localized protein with E3 ligase activity that is involved in regulation of ABA signaling. Loss of function alleles show decreased sensitivity to ABA. Overexpression results in increased sensitivity to ABA.
A_46_P294273	1.96472	1.99205	2.32118
A_46_P190774	1.80967	3.19009	2.56374	Rep: Probable branched-chain-amino-acid aminotransferase 4 - Arabidopsis thaliana (Mouse-ear cress), partial (52%) [TC183169]	AT3G19710	Belongs to the branched-chain amino acid aminotransferase gene family. Encodes a methionine-oxo-acid transaminase. Involved in the methionine chain elongation pathway that leads to the ultimate biosynthesis of methionine-derived glucosinolates.
A_46_P056256	1.5305	2.01247	1.56152	53COT5_T3_016_B02_05SEP2004_014 Brassica napus 36hr germinating seed library 53COT5 Brassica napus cDNA 5', mRNA sequence [DY023806]
A_46_P193609	650.924	796.611	986.293	Rep: Chromosome chr14 scaffold_9, whole genome shotgun sequence - Vitis vinifera (Grape), partial (39%) [TC183598]	AT5G15880	unknown protein; Has 1807 Blast hits to 1807 proteins in 277 species: Archae - 0; Bacteria - 0; Metazoa - 736; Fungi - 347; Plants - 385; Viruses - 0; Other Eukaryotes - 339 (source: NCBI BLink).
A_46_P154264	1.74903	2.76503	1.96521		AT3G58780	One of two genes (SHP1 and SHP2) that are required for fruit dehiscence. The two genes control dehiscence zone differentiation and promote the lignification of adjacent cells.
A_46_P263948	1.51827	1.53752	2.24719	Rep: Expressed protein - Arabidopsis thaliana (Mouse-ear cress), partial (66%) [TC185278]	AT2G40330	Encodes a member of the PYR (pyrabactin resistance )/PYL(PYR1-like)/RCAR (regulatory components of ABA receptor) family proteins with 14 members. PYR/PYL/RCAR family proteins function as abscisic acid sensors. Mediate ABA-dependent regulation of protein
A_46_P343335	2.61371	-1.41003	-1.53597		AT1G02820	Late embryogenesis abundant 3 (LEA3) family protein; FUNCTIONS IN: molecular_function unknown; INVOLVED IN: embryo development, response to stress; EXPRESSED IN: 16 plant structures; EXPRESSED DURING: 8 growth stages; CONTAINS InterPro DOMAIN/s: Late embr
A_46_P341590	5.51831	1.97131	1.97307	Rep: Apr protease - Bacillus licheniformis, partial (11%) [TC193728]
A_46_P247954	2.37823	2.40337	2.62432	Rep: T7N9.18 - Arabidopsis thaliana (Mouse-ear cress), partial (33%) [TC193496]	AT1G27120	Galactosyltransferase family protein; FUNCTIONS IN: transferase activity, transferring hexosyl groups, transferase activity, transferring glycosyl groups; INVOLVED IN: protein amino acid glycosylation; LOCATED IN: endomembrane system, membrane; EXPRESSED
A_46_P140739	2.89617	2.91381	5.07055		AT3G20500	purple acid phosphatase 18 (PAP18); FUNCTIONS IN: protein serine/threonine phosphatase activity, acid phosphatase activity; INVOLVED IN: biological_process unknown; LOCATED IN: endomembrane system; EXPRESSED IN: 24 plant structures; EXPRESSED DURING: 13 g
A_46_P341370	157.286	78.6919	183.249	Rep: Chromosome chr1 scaffold_5, whole genome shotgun sequence - Vitis vinifera (Grape), partial (52%) [TC193591]	AT1G23180	ARM repeat superfamily protein; FUNCTIONS IN: binding; INVOLVED IN: biological_process unknown; LOCATED IN: chloroplast; EXPRESSED IN: 22 plant structures; EXPRESSED DURING: 13 growth stages; CONTAINS InterPro DOMAIN/s: Armadillo-like helical (InterPro:IP
A_46_P037756	2.75501	2.45296	2.12894	24RDBNH_UP_016_H09_09JAN2004_065 Brassica napus 24RDBNH Brassica napus cDNA 5', mRNA sequence [CN731214]	AT1G44960	SNARE associated Golgi protein family; INVOLVED IN: biological_process unknown; LOCATED IN: plasma membrane; EXPRESSED IN: 25 plant structures; EXPRESSED DURING: 15 growth stages; CONTAINS InterPro DOMAIN/s: SNARE associated Golgi protein (InterPro:IPR015
A_46_P278423	1.30684	2.96201	1.74226	13JKBNM2_UP_063_F06_1OCT2007_038 13JKBNM2 Brassica napus cDNA 5', mRNA sequence [GR439251]	AT1G14688	FUNCTIONS IN: molecular_function unknown; INVOLVED IN: biological_process unknown; LOCATED IN: cellular_component unknown; CONTAINS InterPro DOMAIN/s: E3 Ubiquitin ligase (InterPro:IPR022170); Has 30201 Blast hits to 17322 proteins in 780 species: Archae
A_46_P184149	3.72618	-3.23539	-5.35372
A_46_P102034	2.72956	4.39048	2.71543	Rep: Light regulated protein-like protein - Brassica campestris (Field mustard), partial (98%) [TC181481]	AT3G26740	transcripts are differentially regulated at the level of mRNA stability at different times of day controlled by the circadian clock. mRNAs are targets of the mRNA degradation pathway mediated by the downstream (DST) instability determinant.
A_46_P019961	2.68318	2.63993	2.98717	BNARO5GH_T3_026_F07_01DEC2006_053 Brassica napus BNARO5GH Brassica napus cDNA 5', mRNA sequence [ES908072]	AT3G53580	diaminopimelate epimerase family protein; FUNCTIONS IN: diaminopimelate epimerase activity; INVOLVED IN: lysine biosynthetic process via diaminopimelate; LOCATED IN: chloroplast; EXPRESSED IN: 24 plant structures; EXPRESSED DURING: 15 growth stages; CONTA
A_46_P073996	2.7674	1.38783	1.21844	f01_20na_1a.s 20na Brassica napus cDNA clone f01_20na_1a 5, mRNA sequence [GT085251]	AT3G56200	Encodes a putative amino acid transporter.
A_46_P177944	-1.1674	2.03129	3.86196	Rep: Cytochrome P450-like protein - Arabidopsis thaliana (Mouse-ear cress), partial (74%) [TC163772]	AT4G39510	member of CYP96A
A_46_P111214	2.04125	1.93624	1.83163	0135755 Brassica napus Root - drought Brassica napus cDNA, mRNA sequence [EV220647]	AT1G32340	Encodes a protein whose sequence is similar to tobacco hairpin-induced gene (HIN1) and Arabidopsis non-race specific disease resistance gene (NDR1). Expression is not detected under normal conditions and in response to cucumber mosaic virus or spermine.
A_46_P157294	3.47994	3.48519	3.73963		AT2G14110	Haloacid dehalogenase-like hydrolase (HAD) superfamily protein; CONTAINS InterPro DOMAIN/s: HAD-superfamily phosphatase, subfamily IIIC (InterPro:IPR010033), NLI interacting factor (InterPro:IPR004274); Has 332 Blast hits to 325 proteins in 144 species: A
A_46_P101634	5.45359	4.66702	7.10421	BNARO5GH_T3_003_F03_29NOV2006_021 Brassica napus BNARO5GH Brassica napus cDNA 5', mRNA sequence [ES907780]
A_46_P151309	49.4463	137.423	179.791	Rep: AT5g61020/maf19_20 - Arabidopsis thaliana (Mouse-ear cress), partial (45%) [TC184732]
A_46_P168154	1.51283	2.11575	1.90326	Rep: CG34327-PA - Drosophila melanogaster (Fruit fly), partial (19%) [TC163633]
A_46_P100685	2.06715	1.65548	1.08092	BNARO4GH_T3_002_F10_24NOV2006_070 Brassica napus BNARO4GH Brassica napus cDNA 5', mRNA sequence [ES903855]	AT1G12110	Encodes NRT1.1 (CHL1), a dual-affinity nitrate transporter. The protein is expressed in guard cells and function in stomatal opening. Mutants have less transpiration and are more tolerant to drought. Expressed in lateral roots. Involved in nitrate signali
A_46_P345935	2.37653	3.09318	3.02932	Rep: At1g20810 - Arabidopsis thaliana (Mouse-ear cress), partial (98%) [TC196312]	AT1G76405	unknown protein; FUNCTIONS IN: molecular_function unknown; INVOLVED IN: biological_process unknown; LOCATED IN: chloroplast envelope; EXPRESSED IN: 21 plant structures; EXPRESSED DURING: 13 growth stages; BEST Arabidopsis thaliana protein match is: unknow
A_46_P327915	2.24933	1.96552	2.92608	Rep: At5g11630 - Arabidopsis thaliana (Mouse-ear cress), complete [TC184239]	AT5G11630	unknown protein; FUNCTIONS IN: molecular_function unknown; INVOLVED IN: biological_process unknown; LOCATED IN: chloroplast; EXPRESSED IN: 22 plant structures; EXPRESSED DURING: 13 growth stages; BEST Arabidopsis thaliana protein match is: unknown protein
A_46_P292034	3.7758	4.22716	3.52136
A_46_P339525	6.782	6.65594	7.80382	Rep: Chromosome undetermined scaffold_91, whole genome shotgun sequence - Vitis vinifera (Grape), partial (33%) [TC192493]
A_46_P081101	518.748	604.091	986.546	60ACAB48_UP_003_H04_29SEP2004_018 Brassica napus seed library Brassica napus cDNA 5', mRNA sequence [EE422430]	AT3G02515	Member of Sadhu non-coding retrotransposon family
A_46_P272328	49.6618	54.3752	36.7915	BNAOV1GH_T3_086_H08_20SPET2007_050 BNAOV1GH Brassica napus cDNA 5', mRNA sequence [GR449312]	AT4G09960	a MADS box transcription factor expressed in the carpel and ovules
A_46_P229554	2.45108	1.75922	1.74131
A_46_P257384	1.92132	2.24961	1.68931	Rep: Uncharacterized protein At5g66510.2 - Arabidopsis thaliana (Mouse-ear cress), partial (93%) [TC161911]
A_46_P309480	3.08729	1.78457	-1.21767	Rep: Myrosinase-binding protein-like At3g16400 - Arabidopsis thaliana (Mouse-ear cress), partial (93%) [TC165989]
A_46_P201159	2.97336	3.07822	2.78693	Rep: 60S ribosomal protein L5-1 - Arabidopsis thaliana (Mouse-ear cress), partial (48%) [TC199035]
A_46_P146734	2.77426	6.43405	8.77992	Rep: Subtilisin proteinase-like - Arabidopsis thaliana (Mouse-ear cress), partial (14%) [TC198788]	AT4G21650	Subtilase family protein; FUNCTIONS IN: identical protein binding, serine-type endopeptidase activity; INVOLVED IN: proteolysis, negative regulation of catalytic activity; LOCATED IN: plant-type cell wall; EXPRESSED IN: 22 plant structures; EXPRESSED DURI
A_46_P360155	2.59924	2.64735	2.34058	0178668 Brassica napus Leaf library Brassica napus cDNA, mRNA sequence [EV099067]
A_46_P301740	3.16695	2.59721	1.94423		AT1G80560	The AtIMD2 is one out of 3 genes encoding the enzyme 3-isopropylmalate dehydrogenase involved in leucine biosynthesis in Arabidopsis. Its subcellular location has been targeted to plastids.
A_46_P205244	10.226	4.56111	2.76759
A_46_P202684	2.03077	1.99969	2.30951	Rep: Chromosome chr2 scaffold_176, whole genome shotgun sequence - Vitis vinifera (Grape), partial (38%) [TC179163]	AT1G55090	carbon-nitrogen hydrolase family protein; FUNCTIONS IN: hydrolase activity, acting on carbon-nitrogen (but not peptide) bonds, NAD+ synthase (glutamine-hydrolyzing) activity, ATP binding; INVOLVED IN: nitrogen compound metabolic process, NAD biosynthetic
A_46_P332935	2.82151	3.72334	2.59117	Rep: Coclaurine N-methyltransferase - Arabidopsis thaliana (Mouse-ear cress), partial (54%) [TC187980]	AT4G33120	S-adenosyl-L-methionine-dependent methyltransferases superfamily protein; FUNCTIONS IN: (S)-coclaurine-N-methyltransferase activity; INVOLVED IN: lipid biosynthetic process; CONTAINS InterPro DOMAIN/s: Cyclopropane-fatty-acyl-phospholipid/mycolic acid syn
A_46_P283988	3.55071	2.39464	4.42583
A_46_P173524	4.92154	4.97547	4.71814	Rep: At2g46980/F14M4.19 - Arabidopsis thaliana (Mouse-ear cress), partial (14%) [TC196905]	AT2G46980	unknown protein; FUNCTIONS IN: molecular_function unknown; INVOLVED IN: biological_process unknown; LOCATED IN: cellular_component unknown.
A_46_P265588	1.91799	2.44985	2.9193		AT2G40435	BEST Arabidopsis thaliana protein match is: transcription regulators (TAIR:AT3G56220.1); Has 289 Blast hits to 289 proteins in 30 species: Archae - 0; Bacteria - 0; Metazoa - 0; Fungi - 0; Plants - 289; Viruses - 0; Other Eukaryotes - 0 (source: NCBI BLin
A_46_P146629	2.03107	2.52009	2.32774	Rep: Serine carboxypeptidase-like 20 precursor - Arabidopsis thaliana (Mouse-ear cress), complete [TC174980]	AT4G12910	serine carboxypeptidase-like 20 (scpl20); FUNCTIONS IN: serine-type carboxypeptidase activity; INVOLVED IN: proteolysis; LOCATED IN: vacuole; EXPRESSED IN: 23 plant structures; EXPRESSED DURING: 13 growth stages; CONTAINS InterPro DOMAIN/s: Peptidase S10,
A_46_P383793	27.6532	43.273	60.9587	Rep: Complete genome - Listeria welshimeri serovar 6b (strain ATCC 35897 / DSM 20650 /SLCC5334), partial (5%) [TC196973]
A_46_P268283	449.61	541.252	421.054
A_46_P008956	19.3813	26.0446	16.8924	Brassica napus mRNA for SIAH1 protein (siah1 gene) [AJ249908]
A_46_P323795	2.06363	2.59026	2.27609	Brassica napus cultivar Ningyou16 Na+ [GU192449]	AT4G32940	Encodes a vacuolar processing enzyme belonging to a novel group of cysteine proteinases that is expressed in vegetative organs and is upregulated in association with various types of cell death and under stressed conditions. They are essential in processi
A_46_P287053	2.1885	2.01177	2.26657	Rep: Proteasome subunit beta type-6 precursor - Arabidopsis thaliana (Mouse-ear cress), complete [TC175906]
A_46_P374920	2.82755	1.13318	-1.25278	Rep: Uncharacterized protein At2g40270.2 - Arabidopsis thaliana (Mouse-ear cress), partial (71%) [TC210038]	AT2G40270	Protein kinase family protein; FUNCTIONS IN: protein kinase activity, kinase activity, ATP binding; INVOLVED IN: protein amino acid phosphorylation; LOCATED IN: plasma membrane; EXPRESSED IN: 22 plant structures; EXPRESSED DURING: 13 growth stages; CONTAI
A_46_P333165	5.72472	4.49733	5.20008	Rep: F3E22.21 protein - Arabidopsis thaliana (Mouse-ear cress), partial (48%) [TC188138]	AT3G06660	PAPA-1-like family protein / zinc finger (HIT type) family protein; LOCATED IN: chloroplast; EXPRESSED IN: 23 plant structures; EXPRESSED DURING: 14 growth stages; CONTAINS InterPro DOMAIN/s: Zinc finger, HIT-type (InterPro:IPR007529), PAPA-1-like conserv
A_46_P374350	2.30765	2.35955	2.46273	Rep: F-box protein PP2-A11 - Arabidopsis thaliana (Mouse-ear cress), partial (7%) [TC209817]	AT1G63090	phloem protein 2-A11 (PP2-A11); FUNCTIONS IN: carbohydrate binding; INVOLVED IN: N-terminal protein myristoylation; LOCATED IN: cellular_component unknown; EXPRESSED IN: 24 plant structures; EXPRESSED DURING: 15 growth stages; CONTAINS InterPro DOMAIN/s:
A_46_P146489	2.40283	-1.98349	-1.10937	21ACACMS_UP_001_A10_08MAR2004_080 Brassica napus 21ACACMS Brassica napus cDNA 5', mRNA sequence [CX278822]	AT4G25200	AtHSP23.6-mito mRNA, nuclear gene encoding mitochondrial
A_46_P145949	2.85479	2.48394	2.32522	Rep: Predicted protein - Physcomitrella patens subsp. patens, partial (91%) [TC166628]	AT3G62600	J domain protein localized in ER lumen. Can partially compensate for the growth defect in jem1 scj1 mutant yeast. Forms a complex SDF2-ERdj3B-BiP that is required for the proper accumulation of the surface-exposed leucine-rich repeat receptor kinases EFR.
A_46_P336200	1.78103	1.97262	2.0065	55ACACPE_UP_026_F12_20DEC2004_086 Brassica napus AC Excell Brassica napus cDNA 5', mRNA sequence [EE411902]
A_46_P168444	347.968	587.334	725.49	Rep: Genomic DNA, chromosome 3, BAC clone: T13O13 - Arabidopsis thaliana (Mouse-ear cress), partial (87%) [TC184077]	AT3G32930	unknown protein; FUNCTIONS IN: molecular_function unknown; INVOLVED IN: biological_process unknown; LOCATED IN: chloroplast envelope; EXPRESSED IN: 22 plant structures; EXPRESSED DURING: 13 growth stages; Has 57 Blast hits to 57 proteins in 11 species: Ar
A_46_P244339	1.52955	1.95983	2.22686		AT4G32340	Tetratricopeptide repeat (TPR)-like superfamily protein; BEST Arabidopsis thaliana protein match is: Tetratricopeptide repeat (TPR)-like superfamily protein (TAIR:AT1G80130.1); Has 1807 Blast hits to 1807 proteins in 277 species: Archae - 0; Bacteria - 0;
A_46_P002111	2.88937	1.59652	1.67353	Bn01b_03f20_A Bn01b_AAFC_ECORC_transgenic_Brassica_napus_overexpressing_BNCBF17_constitutively_frost_tolerant Brassica napus cDNA clone Bn01b_03f20, mRNA sequence [CB686070]	AT5G16570	Encodes a cytosolic glutamine synthetase, the enzyme has high affinity with substrate ammonium
A_46_P220424	1.14172	1.4904	2.14984		AT5G06270	unknown protein; FUNCTIONS IN: molecular_function unknown; INVOLVED IN: biological_process unknown; LOCATED IN: chloroplast; EXPRESSED IN: 21 plant structures; EXPRESSED DURING: 11 growth stages; BEST Arabidopsis thaliana protein match is: unknown protein
A_46_P230169	1.15097	1.12284	2.59399			Auxin-responsive factor 2 (ARF2)
A_46_P037302	31.9573	21.5742	25.12	BNAEN1GH_UP_032_A04_21JUL2006_032 Brassica napus BNAEN1GH Brassica napus cDNA 5', mRNA sequence [ES988450]	AT5G67270	encodes a homolog of animal microtubule-end-binding protein. There are two other members of this family. EB1 forms foci at regions where the minus ends of microtubules are gathered during mitosis and early cytokinesis.
A_46_P095881	1.32683	2.78326	1.51293	BNAOV1GH_T3_074_D05_17SEPT2007_041 BNAOV1GH Brassica napus cDNA 5', mRNA sequence [GR448159]
A_46_P061556	1.52625	2.2354	2.14935	BNSCS3CT_UP_047_F04_04MAY2007_022 Brassica napus BNSCS3CT Brassica napus cDNA 5', mRNA sequence [EV040258]	AT3G58780	One of two genes (SHP1 and SHP2) that are required for fruit dehiscence. The two genes control dehiscence zone differentiation and promote the lignification of adjacent cells.
A_46_P077016	3.3161	3.07815	6.22494	17ACDHMS_UP_012_D03_27OCT2004_025 Brassica napus 17ACDHMS Brassica napus cDNA 5', mRNA sequence [EE404636]	AT3G20970	Encodes a protein containing the NFU domain that may be involved in iron-sulfur cluster assembly. Part of a five member gene family, more closely related to NFU5 than to NFU1,2, and 3. Targeted to the mitochondrion.
A_46_P119159	1.49939	2.87213	2.69163	0204599 Brassica napus Very early anther Brassica napus cDNA, mRNA sequence [EV138673]	AT2G35750	unknown protein; FUNCTIONS IN: molecular_function unknown; INVOLVED IN: biological_process unknown; LOCATED IN: endomembrane system; EXPRESSED IN: 23 plant structures; EXPRESSED DURING: 13 growth stages; Has 1 Blast hits to 1 proteins in 1 species: Archae
A_46_P354860	3.02211	4.34524	4.86438		AT4G11211	unknown protein; Has 35333 Blast hits to 34131 proteins in 2444 species: Archae - 798; Bacteria - 22429; Metazoa - 974; Fungi - 991; Plants - 531; Viruses - 0; Other Eukaryotes - 9610 (source: NCBI BLink).
A_46_P275518	2.23385	-1.09559	-1.01113	Rep: F9C16.7 - Arabidopsis thaliana (Mouse-ear cress), partial (42%) [TC192178]	AT2G04260	pseudogene, BS1-related mitochondrial protein, blastp match of 53% identity and 8.5e-45 P-value to GP|17385707|dbj|BAB78658.1||AP003022 P0681B11.25 {Oryza sativa (japonica cultivar-group)}
A_46_P340160	2.44818	2.32091	2.00671	Rep: Predicted protein - Pichia guilliermondii (Yeast) (Candida guilliermondii), partial (3%) [TC188419]	AT5G63135	unknown protein; Has 30201 Blast hits to 17322 proteins in 780 species: Archae - 12; Bacteria - 1396; Metazoa - 17338; Fungi - 3422; Plants - 5037; Viruses - 0; Other Eukaryotes - 2996 (source: NCBI BLink).
A_46_P252224	6.52026	5.76745	4.74059	Rep: Os01g0916300 protein - Oryza sativa subsp. japonica (Rice), partial (12%) [TC188910]	AT2G41020	WW domain-containing protein; CONTAINS InterPro DOMAIN/s: WW/Rsp5/WWP (InterPro:IPR001202); Has 960 Blast hits to 908 proteins in 168 species: Archae - 0; Bacteria - 0; Metazoa - 521; Fungi - 106; Plants - 105; Viruses - 0; Other Eukaryotes - 228 (source:
A_46_P353100	1.79525	1.41806	2.44139		AT1G12830	unknown protein; FUNCTIONS IN: molecular_function unknown; INVOLVED IN: biological_process unknown; LOCATED IN: cellular_component unknown; EXPRESSED IN: 23 plant structures; EXPRESSED DURING: 13 growth stages; Has 39778 Blast hits to 22088 proteins in 10
A_46_P133149	2.24274	1.75205	1.9941	Rep: 60S acidic ribosomal protein P0-2 - Arabidopsis thaliana (Mouse-ear cress), partial (97%) [TC174652]
A_46_P367390	2.34558	2.33804	2.29189
A_46_P048111	3.35462	1.48952	1.85742	0192011 Brassica napus Apical meristem Brassica napus cDNA, mRNA sequence [EV094010]	AT1G63780	Small nucleolar ribonucleoprotein protein involved in ribosomal RNA processing. Located in nucleolus and cajal bodies.
A_46_P336500	2.65517	1.98006	2.23239	Rep: F8A5.21 protein - Arabidopsis thaliana (Mouse-ear cress), partial (38%) [TC190480]	AT1G60730	NAD(P)-linked oxidoreductase superfamily protein; FUNCTIONS IN: oxidoreductase activity, aldo-keto reductase activity; INVOLVED IN: oxidation reduction; EXPRESSED IN: 7 plant structures; EXPRESSED DURING: LP.06 six leaves visible, LP.04 four leaves visibl
A_46_P257329	7.40812	4.76731	3.82899	0145871 Brassica napus Etiolated seedlings (pSPORT1) Brassica napus cDNA, mRNA sequence [EV177244]	AT5G14920	Gibberellin-regulated family protein; INVOLVED IN: response to gibberellin stimulus; LOCATED IN: endomembrane system; EXPRESSED IN: 22 plant structures; EXPRESSED DURING: 13 growth stages; CONTAINS InterPro DOMAIN/s: Gibberellin regulated protein (InterPr
A_46_P022006	2.08799	1.69274	1.53516	0089798 Brassica napus Cold acclimation - dark Brassica napus cDNA, mRNA sequence [EV192317]	AT1G01860	dimethyladenosine transferase
A_46_P086696	1.24	1.83582	2.02364	0082747 Brassica napus Bud library Brassica napus cDNA, mRNA sequence [EV158885]
A_46_P347730	2.54204	2.1769	2.48221	Rep: F1B16.10 protein - Arabidopsis thaliana (Mouse-ear cress), partial (32%) [TC197376]
A_46_P193529	5.63058	-1.9774	-5.91393		AT5G42530	unknown protein; FUNCTIONS IN: molecular_function unknown; INVOLVED IN: biological_process unknown; LOCATED IN: endomembrane system; BEST Arabidopsis thaliana protein match is: unknown protein (TAIR:AT2G25510.2); Has 30201 Blast hits to 17322 proteins in
A_46_P356945	2.65941	1.38692	2.32987	Rep: Histone deacetylase 6 - Arabidopsis thaliana (Mouse-ear cress), partial (92%) [TC167634]	AT5G63110	RPD3-like histone deacetylase. HDA6 mutations specifically increase the expression of auxin-responsive transgenes, suggesting a role in transgene silencing.
A_46_P274573	1.62549	1.85533	2.11582	Rep: ERECTA - Arabidopsis thaliana (Mouse-ear cress), partial (48%) [TC177557]	AT2G26330	Homologous to receptor protein kinases. Involved in specification of organs originating from the shoot apical meristem. Contains a cytoplasmic protein kinase catalytic domain, a transmembrane region, and an extracellular leucine-rich repeat. ER has been
A_46_P379908	809.346	529.038	887.533	Rep: 60S ribosomal protein L13a-3 - Arabidopsis thaliana (Mouse-ear cress), partial (64%) [TC204873]
A_46_P371240	1.98428	2.12298	1.63359	Rep: MTN3-like protein - Arabidopsis thaliana (Mouse-ear cress), partial (60%) [TC208611]	AT3G48740	Nodulin MtN3 family protein; INVOLVED IN: biological_process unknown; LOCATED IN: endomembrane system, integral to membrane, membrane; EXPRESSED IN: 22 plant structures; EXPRESSED DURING: 13 growth stages; CONTAINS InterPro DOMAIN/s: MtN3/saliva-related t
A_46_P171479	2.26271	2.35459	2.22669
A_46_P382663	2.22607	2.55603	1.6517	0158317 Brassica napus Etiolated seedlings (Uni-ZAP) Brassica napus cDNA, mRNA sequence [EV174251]	AT3G23990	mitochondrial chaperonin HSP. assist in rapid assembly of the oligomeric protein structures in the mitochondria.
A_46_P265248	1.76948	1.67744	2.35012
A_46_P380228	1.3241	2.30197	2.06372	Rep: Chromosome chr4 scaffold_73, whole genome shotgun sequence - Vitis vinifera (Grape), partial (42%) [TC212218]	AT2G18465	Chaperone DnaJ-domain superfamily protein; FUNCTIONS IN: heat shock protein binding; INVOLVED IN: protein folding; LOCATED IN: cellular_component unknown; CONTAINS InterPro DOMAIN/s: Molecular chaperone, heat shock protein, Hsp40, DnaJ (InterPro:IPR015609
A_46_P348770	6.73339	6.11723	5.87345	Rep: Serine/arginine-rich protein - Arabidopsis thaliana (Mouse-ear cress), partial (92%) [TC197901]	AT1G55310	Encodes a SR spliceosome protein that is localized to nuclear specks, interacts with SR45 and the U1-70K protein of the U1 snRNP, has sequence similar to human SC35 protein. Barta et al (2010) have proposed a nomenclature for Serine/Arginine-Rich Protein
A_46_P280983	1.10876	1.0362	2.61273	Rep: F7G19.6 protein - Arabidopsis thaliana (Mouse-ear cress), partial (27%) [TC194698]	AT1G09070	SRC2 specifically binds the peptide PIEPPPHH, and moves from ER to a vacuole fraction where it gets internalized. Involved in Protein Storage Vacuole targeting.
A_46_P332570	2.34052	2.07123	1.77974	Rep: Auxin response factor 18 - Arabidopsis thaliana (Mouse-ear cress), partial (90%) [TC176930]	AT3G61830	auxin response factor 18 (ARF18); FUNCTIONS IN: sequence-specific DNA binding transcription factor activity; INVOLVED IN: response to hormone stimulus, regulation of transcription, DNA-dependent, regulation of transcription; LOCATED IN: nucleus; EXPRESSED
A_46_P365960	1.79545	2.03321	1.99116	Rep: At4g16444 - Arabidopsis thaliana (Mouse-ear cress), partial (79%) [TC206318]	AT4G16444	FUNCTIONS IN: molecular_function unknown; INVOLVED IN: biological_process unknown; LOCATED IN: endomembrane system; EXPRESSED IN: 24 plant structures; EXPRESSED DURING: 15 growth stages; CONTAINS InterPro DOMAIN/s: CHD5-like protein (InterPro:IPR007514);
A_46_P188754	11.5297	12.2353	12.7853	Rep: 60S ribosomal protein L31-1 - Arabidopsis thaliana (Mouse-ear cress), complete [TC189324]	AT2G19740	Ribosomal protein L31e family protein; FUNCTIONS IN: structural constituent of ribosome; INVOLVED IN: translation, ribosome biogenesis; LOCATED IN: cytosolic ribosome, ribosome, cytosolic large ribosomal subunit, chloroplast, plasma membrane; EXPRESSED IN
A_46_P173859	44.1222	52.7723	40.1892	Rep: Chromosome chr12 scaffold_38, whole genome shotgun sequence - Vitis vinifera (Grape), partial (88%) [TC209701]
A_46_P246889	2.76599	1.79863	2.12821		AT3G61980	serine protease inhibitor, Kazal-type family protein; FUNCTIONS IN: serine-type endopeptidase inhibitor activity; INVOLVED IN: biological_process unknown; LOCATED IN: plasma membrane, anchored to membrane; EXPRESSED IN: 24 plant structures; EXPRESSED DURI
A_46_P161404	3.61986	3.35399	3.31563	Rep: Heterotrimeric G protein gamma-subunit - Arabidopsis thaliana (Mouse-ear cress), partial (82%) [TC174548]
A_46_P054276	2.30533	4.37781	3.33741	19ACACYS_UP_002_D09_29JAN2004_073 Brassica napus 19ACACYS Brassica napus cDNA 5', mRNA sequence [DY003886]	AT3G63350	member of Heat Stress Transcription Factor (Hsf) family
A_46_P212960	1.01997	1.72738	2.99054	Rep: Xyloglucan endotransglucosylase/hydrolase protein 24 precursor - Arabidopsis thaliana (Mouse-ear cress), complete [TC176671]	AT5G59320	Predicted to encode a PR (pathogenesis-related) protein. Belongs to the lipid transfer protein (PR-14) family with the following members: At2g38540/LTP1, At2g38530/LTP2, At5g59320/LTP3, At5g59310/LTP4, At3g51600/LTP5, At3g08770/LTP6, At2g15050/LTP7, At
A_46_P272268	1.97955	1.84544	3.08125
A_46_P260733	34.5021	29.1563	99.495	BNBS2DCT_UP_015_D02_12MAR2005_010 Brassica napus seeds BNBS2DCT Brassica napus cDNA 5', mRNA sequence [EE452106]
A_46_P245479	2.00855	2.16675	3.48945
A_46_P360685	2.67559	2.38659	2.53274	Rep: T12C24.17 - Arabidopsis thaliana (Mouse-ear cress), partial (98%) [TC203972]	AT1G63050	MBOAT (membrane bound O-acyl transferase) family protein; FUNCTIONS IN: acyltransferase activity; INVOLVED IN: biological_process unknown; LOCATED IN: endomembrane system, membrane; EXPRESSED IN: 23 plant structures; EXPRESSED DURING: 12 growth stages; CO
A_46_P176204	5.86676	3.49732	2.48138	Rep: Autophagy-related protein 7 - Arabidopsis thaliana (Mouse-ear cress), partial (27%) [TC192023]	AT5G45900	Component of autophagy conjugation pathway. Required for proper senescence.
A_46_P178849	2.0422	2.50164	2.22492	Rep: Uridine 5'-monophosphate synthase (UMP synthase) [Includes: Orotate phosphoribosyltransferase (EC 2.4.2.10) (OPRTase); Orotidine 5'- phosphate decarboxylase (EC 4.1.1.23) (OMPdecase)] - Arabidopsis thaliana (Mouse-ear cress), partial (12%) [TC200295]	AT3G54470	encodes the bi-functional orotate phosphoribosyltransferase/orotidine-5'-phosphate decarboxylase catalyzing the fifth and sixth step in the de novo pyrimidine ribonucleotide biosynthesis
A_46_P257364	2.27338	3.07786	3.32964	Rep: Immunoglobulin superfamily member 6 precursor - Homo sapiens (Human), partial (7%) [TC172352]	AT5G08270	unknown protein; BEST Arabidopsis thaliana protein match is: unknown protein (TAIR:AT5G23200.1); Has 89 Blast hits to 86 proteins in 45 species: Archae - 0; Bacteria - 0; Metazoa - 27; Fungi - 0; Plants - 48; Viruses - 0; Other Eukaryotes - 14 (source: NC
A_46_P150369	22.2844	34.8143	62.1478	Rep: MLP-like protein 328 - Arabidopsis thaliana (Mouse-ear cress), complete [TC163351]	AT3G26460	Polyketide cyclase/dehydrase and lipid transport superfamily protein; FUNCTIONS IN: molecular_function unknown; INVOLVED IN: response to biotic stimulus, defense response; LOCATED IN: cellular_component unknown; EXPRESSED IN: hypocotyl, root; CONTAINS Int
A_46_P190469	2.7311	2.71524	2.395
A_46_P349420	13.498	15.5857	14.0227	Rep: Uncharacterized protein At4g21540.4 - Arabidopsis thaliana (Mouse-ear cress), partial (45%) [TC198299]
A_46_P141119	12.6817	1.92471	1.75651	Brassica napus dihydroflavonol reductase (DFR) mRNA, complete cds [DQ767950]	AT5G42800	dihydroflavonol reductase. Catalyzes the conversion of dihydroquercetin to leucocyanidin in the biosynthesis of anthocyanins.
A_46_P216264	5.23036	2.80602	2.79028	Rep: AT4g10060/T5L19_190 - Arabidopsis thaliana (Mouse-ear cress), partial (21%) [TC192943]	AT4G10060	Beta-glucosidase, GBA2 type family protein; FUNCTIONS IN: catalytic activity, glucosylceramidase activity; INVOLVED IN: glucosylceramide catabolic process, sphingolipid metabolic process; LOCATED IN: vacuole; EXPRESSED IN: 21 plant structures; EXPRESSED D
A_46_P160679	2.07433	1.96033	1.79756	Rep: RAN GTPase activating protein 2 - Arabidopsis thaliana (Mouse-ear cress), partial (43%) [TC178613]	AT5G19320	Encodes RAN GTPase activating protein 2. The protein is localized to the nuclear envelope during interphase.
A_46_P380383	1.59232	2.23194	2.25953	Rep: Arabidopsis thaliana genomic DNA, chromosome 3, P1 clone: MYA6 - Arabidopsis thaliana (Mouse-ear cress), partial (97%) [TC212288]	AT3G16250	encodes a novel subunit of the chloroplast NAD(P)H dehydrogenase complex, involved in cyclic electron flow around photosystem I to produce ATP. Contains a 4Fe-4S cluster.
A_46_P099589	1.77416	1.74883	3.60801	BNARO1GH_T3_019_G03_23NOV2006_019 Brassica napus BNARO1GH Brassica napus cDNA 5', mRNA sequence [ES901180]	AT3G16520	UDP-glucosyl transferase 88A1 (UGT88A1); FUNCTIONS IN: in 6 functions; INVOLVED IN: metabolic process; LOCATED IN: cellular_component unknown; EXPRESSED IN: 22 plant structures; EXPRESSED DURING: 13 growth stages; CONTAINS InterPro DOMAIN/s: UDP-glucurono
A_46_P344805	2.17109	1.99521	2.0738		AT4G34412	CONTAINS InterPro DOMAIN/s: Kinase binding protein CGI-121 (InterPro:IPR013926); Has 275 Blast hits to 275 proteins in 139 species: Archae - 0; Bacteria - 5; Metazoa - 98; Fungi - 109; Plants - 42; Viruses - 0; Other Eukaryotes - 21 (source: NCBI BLink).
A_46_P236564	-1.33276	2.40467	1.25773	Rep: Uncharacterized protein At5g42900.3 - Arabidopsis thaliana (Mouse-ear cress), partial (11%) [TC162398]	AT2G23880	transposable element gene; non-LTR retrotransposon family (LINE), has a 4.4e-41 P-value blast match to GB:NP_038605 L1 repeat, Tf subfamily, member 30 (LINE-element) (Mus musculus)
A_46_P045296	2.1676	1.06104	-1.17145	Rep: F9C16.7 - Arabidopsis thaliana (Mouse-ear cress), complete [TC177317]	AT1G43910	P-loop containing nucleoside triphosphate hydrolases superfamily protein; FUNCTIONS IN: nucleoside-triphosphatase activity, ATPase activity, nucleotide binding, ATP binding; LOCATED IN: endomembrane system; EXPRESSED IN: 23 plant structures; EXPRESSED DUR
A_46_P245949	62.5305	53.7674	52.4278	Rep: Peroxiredoxin-2E, chloroplast precursor - Arabidopsis thaliana (Mouse-ear cress), partial (64%) [TC192217]	AT3G52960	Thioredoxin superfamily protein; FUNCTIONS IN: oxidoreductase activity, antioxidant activity; INVOLVED IN: defense response to bacterium, peptidyl-cysteine S-nitrosylation; LOCATED IN: thylakoid, chloroplast stroma, chloroplast, plant-type cell wall; EXPR
A_46_P182964	1.84629	1.82183	2.4953	Rep: protein kinase family protein - Arabidopsis thaliana, partial (20%) [TC178916]	AT1G04700	PB1 domain-containing protein tyrosine kinase; FUNCTIONS IN: protein serine/threonine/tyrosine kinase activity, protein kinase activity; INVOLVED IN: protein amino acid phosphorylation; LOCATED IN: cytosol; EXPRESSED IN: 22 plant structures; EXPRESSED DUR
A_46_P328925	1.24293	2.2752	1.96747	Rep: Sedoheptulose-1,7-bisphosphatase, chloroplast precursor (EC 3.1.3.37) (Sedoheptulose bisphosphatase) (SBPase) (SED(1,7)P2ase) - Arabidopsis thaliana (Mouse-ear cress), complete [TC184961]	AT3G55800	Encodes the chloroplast enzyme sedoheptulose-1,7-bisphosphatase (SBPase), involved in the carbon reduction of the Calvin cycle. Increase in SBPase activity in transgenic lines accumulate up to 50% more sucrose and starch than wild-type.
A_46_P284008	4.9802	1.42034	1.10343
A_46_P378153	2.11131	2.27523	1.55085	Rep: UDP-glucoronosyl/UDP-glucosyl transferase family protein - Arabidopsis thaliana (Mouse-ear cress), partial (88%) [TC205797]	AT2G16890	UDP-Glycosyltransferase superfamily protein; FUNCTIONS IN: transferase activity, transferring hexosyl groups, UDP-glycosyltransferase activity, transferase activity, transferring glycosyl groups; INVOLVED IN: metabolic process; LOCATED IN: endomembrane sy
A_46_P154919	1179.96	1781.66	2361.03		AT2G44620	Encodes a member of the mitochondrial acyl carrier protein (ACP) family. As part of the mitochondrial matrix, it is likely to be involved in fatty acid or lipoic acid biogenesis. Its acylated form is predominantly present in the mitochondrial membrane wh
A_46_P180579	3.73486	3.34011	2.65529		AT2G40600	appr-1-p processing enzyme family protein; FUNCTIONS IN: molecular_function unknown; INVOLVED IN: biological_process unknown; LOCATED IN: chloroplast; EXPRESSED IN: 22 plant structures; EXPRESSED DURING: 13 growth stages; CONTAINS InterPro DOMAIN/s: Appr-
A_46_P057881	3.88804	2.2861	1.1477	BNARO6GH_T3_024_H05_07DEC2006_033 Brassica napus BNARO6GH Brassica napus cDNA 5', mRNA sequence [ES910981]	AT4G02980	Auxin binding protein involved in cell elongation and cell division. ABP1 is ubiquitinated in vitro and in planta by AtRma2.
A_46_P286813	2.72392	1.93319	2.10946	BNARO5GH_T3_008_D05_29NOV2006_041 Brassica napus BNARO5GH Brassica napus cDNA 5', mRNA sequence [ES905948]	AT1G74920	ALDH10A8 encodes a protein that has not been functionally characterized, but it is similar to an Arabidopsis protein that has betaine aldehyde dehydrogenase and aminoaldehyde dehydrogenase activity. ALDH10A8 localizes to leucoplasts. aldh10a8 mutant plant
A_46_P075051	34.1754	40.9492	34.3574	13JKBNM2_UP_039_H04_28SEPT2007_018 13JKBNM2 Brassica napus cDNA 5', mRNA sequence [GR437288]	AT4G26780	unknown function
A_46_P149909	2.35728	2.36251	2.4006	AAC80583.1 - Arabidopsis thaliana (Mouse-ear cress), partial (12%) [TC166924]
A_46_P253064	20.751	31.4298	23.3385
A_46_P171549	15.7745	2.26895	3.01248	Rep: Glucosyltransferase-like protein - Arabidopsis thaliana (Mouse-ear cress), partial (32%) [TC176964]	AT5G22740	encodes a beta-mannan synthase based on in vitro enzyme assays from heterologously expressed protein
A_46_P215599	4.04756	4.45252	3.19103	Rep: Benzoyl coenzyme A: benzyl alcohol benzoyl transferase - Petunia hybrida (Petunia), partial (53%) [TC174688]	AT3G03480	acetyl CoA:(Z)-3-hexen-1-ol acetyltransferase (CHAT); CONTAINS InterPro DOMAIN/s: Transferase (InterPro:IPR003480); BEST Arabidopsis thaliana protein match is: HXXXD-type acyl-transferase family protein (TAIR:AT5G17540.1); Has 2522 Blast hits to 2511 prot
A_46_P174564	1.95782	2.31376	1.99592	Rep: Cyclin-C1-1 - Arabidopsis thaliana (Mouse-ear cress), partial (95%) [TC192373]	AT5G48640	Cyclin family protein; CONTAINS InterPro DOMAIN/s: Cyclin-like (InterPro:IPR011028), Cyclin-related (InterPro:IPR013763), Cyclin, N-terminal (InterPro:IPR006671), Cyclin (InterPro:IPR006670); BEST Arabidopsis thaliana protein match is: Cyclin family prote
A_46_P331740	3.3083	3.23436	3.30574	Rep: KANADI protein - Arabidopsis thaliana (Mouse-ear cress), partial (97%) [TC186971]	AT5G16560	Encodes a KANADI protein (KAN) that regulates organ polarity in Arabidopsis. KAN is required for abaxial identity in both leaves and carpels, and encodes a nuclear-localized protein in the GARP family of putative transcription factors. Together with KAN
A_46_P020791	1.64914	1.99478	2.08039	BNARO1GH_T3_031_E09_23NOV2006_071 Brassica napus BNARO1GH Brassica napus cDNA 5', mRNA sequence [ES902610]
A_46_P204044	3.41226	2.45283	3.1643
A_46_P350565	3.1901	3.72464	3.24633	Rep: RAD21-3 - Arabidopsis thaliana (Mouse-ear cress), partial (13%) [TC198960]	AT5G16270	Encodes a SCC1/REC8 ortholog that may be involved in mitosis and may represent a mitotic cohesin.
A_46_P260443	2.2194	-1.13503	1.41875		AT2G29670	Tetratricopeptide repeat (TPR)-like superfamily protein; FUNCTIONS IN: binding; LOCATED IN: chloroplast; EXPRESSED IN: 23 plant structures; EXPRESSED DURING: 15 growth stages; CONTAINS InterPro DOMAIN/s: Tetratricopeptide-like helical (InterPro:IPR011990)
A_46_P011686	1.33894	1.47238	2.31281	BN25.059K18F011129 BN25 Brassica napus cDNA clone BN25059K18, mRNA sequence [CD825078]	AT4G22910	FIZZY-related 2 (FZR2); FUNCTIONS IN: signal transducer activity; INVOLVED IN: trichome branching, signal transduction, DNA endoreduplication, cell growth; LOCATED IN: chloroplast, heterotrimeric G-protein complex; EXPRESSED IN: 24 plant structures; EXPRE
A_46_P276003	2.30368	1.89139	1.21961	CAB62461.1 - Arabidopsis thaliana (Mouse-ear cress), partial (95%) [TC197679]	AT3G49570	RESPONSE TO LOW SULFUR 3 (LSU3); BEST Arabidopsis thaliana protein match is: response to low sulfur 2 (TAIR:AT5G24660.1); Has 71 Blast hits to 71 proteins in 14 species: Archae - 0; Bacteria - 0; Metazoa - 1; Fungi - 0; Plants - 70; Viruses - 0; Other Euk
A_46_P275368	2.08296	3.19136	3.84482		AT4G34700	Encodes the B22 subunit of eukaryotic mitochondrial Complex I. Mutation in the gene display pleiotropic phenotypes including shorter roots, smaller plants and delayed flowering.
A_46_P192004	6.98663	6.85556	6.47954	Rep: F3I6.29 protein - Arabidopsis thaliana (Mouse-ear cress), partial (90%) [TC166825]
A_46_P191439	1.20501	2.59997	2.00119
A_46_P009016	4.61543	5.40481	6.00695	Brassica napus mRNA for PCF11 putative protein [AJ271780]	AT1G66500	Pre-mRNA cleavage complex II; FUNCTIONS IN: zinc ion binding; INVOLVED IN: biological_process unknown; LOCATED IN: intracellular; EXPRESSED IN: male gametophyte, pollen tube; EXPRESSED DURING: L mature pollen stage, M germinated pollen stage; CONTAINS Int
A_46_P318870	4.27906	6.9215	12.4744	Rep: Protein-disulfide reductase precursor - Pseudomonas putida (strain GB-1), partial (3%) [TC176238]
A_46_P334845	2.92164	3.40902	3.03878	BNZB_UP_187_B09_13MAR2006_077 Brassica napus BNZB Brassica napus cDNA 5', mRNA sequence [ES967465]
A_46_P041731	2.40276	2.51992	2.02736	0097754 Brassica napus Cold acclimation - light Brassica napus cDNA, mRNA sequence [EV196601]
A_46_P269228	6.11378	4.26297	4.0144	Rep: Betaine aldehyde dehydrogenase 1, chloroplast precursor - Arabidopsis thaliana (Mouse-ear cress), partial (41%) [TC165432]	AT1G77370	Glutaredoxin family protein; FUNCTIONS IN: electron carrier activity, arsenate reductase (glutaredoxin) activity, protein disulfide oxidoreductase activity; INVOLVED IN: cell redox homeostasis; LOCATED IN: endomembrane system; EXPRESSED IN: 22 plant struc
A_46_P071471	3.61276	2.19541	2.05582	BNYS2DCT_UP_028_H06_02MAR2005_034 Brassica napus seeds BNYS2DCT Brassica napus cDNA 5', mRNA sequence [EE475652]
A_46_P235879	2.2069	2.01659	1.78762	Rep: Isoform 2 of Q8VYF5 - Arabidopsis thaliana (Mouse-ear cress), complete [TC163569]
A_46_P351465	2.82369	1.84297	1.35523	Rep: Probable riboflavin biosynthesis related protein - Arabidopsis thaliana (Mouse-ear cress), partial (69%) [TC199453]	AT4G20960	encodes diaminohydroxyphosphoribosylaminopyrimidine deaminase catalyzing the second step in the riboflavin biosynthesis
A_46_P133184	2.34858	2.18179	2.68435		AT2G36160	Ribosomal protein S11 family protein; FUNCTIONS IN: structural constituent of ribosome; INVOLVED IN: translation; LOCATED IN: cytosolic small ribosomal subunit, cytosolic ribosome, plasma membrane, chloroplast, membrane; EXPRESSED IN: 26 plant structures;
A_46_P043466	2.51073	-1.61227	-2.75008	BNDH4DCT_UP_015_H02_17DEC2004_002 Brassica napus seeds BNDH4DCT Brassica napus cDNA 5', mRNA sequence [DY006183]	AT1G03170	A member of the FAF family proteins encoded by the FANTASTIC FOUR (FAF) genes: AT4G02810 (FAF1), AT1G03170 (FAF2), AT5G19260 (FAF3) and AT3G06020 (FAF4). FAFs have the potential to regulate shoot meristem size in Arabidopsis thaliana. FAFs can repress
A_46_P217224	15.2474	14.3456	8.70381	Rep: Uncharacterized protein At4g20010.2 - Arabidopsis thaliana (Mouse-ear cress), partial (75%) [TC166667]
A_46_P366915	2.03651	1.96852	1.92357	0207322 Brassica napus Very early anther Brassica napus cDNA, mRNA sequence [EV141391]
A_46_P247224	2.7985	2.96793	2.91022	CAB61034.1 - Arabidopsis thaliana (Mouse-ear cress), partial (56%) [TC182972]
A_46_P064626	1.48482	2.07399	1.24067	BNSCS2CT_UP_289_A03_25MAY2007_031 Brassica napus BNSCS2CT Brassica napus cDNA 5', mRNA sequence [EV036728]	AT4G24760	alpha/beta-Hydrolases superfamily protein; FUNCTIONS IN: serine-type peptidase activity; INVOLVED IN: proteolysis; EXPRESSED IN: 21 plant structures; EXPRESSED DURING: 13 growth stages; CONTAINS InterPro DOMAIN/s: Peptidase S9, prolyl oligopeptidase, cata
A_46_P327205	2.60318	2.20093	1.97487	Rep: Luminal-binding protein 2 precursor - Arabidopsis thaliana (Mouse-ear cress), partial (32%) [TC183712]	AT5G42020	Luminal binding protein (BiP2) involved in polar nuclei fusion during proliferation of endosperm nuclei.
A_46_P181249	4.20319	2.80371	3.56358	Rep: Chromosome chr2 scaffold_11, whole genome shotgun sequence - Vitis vinifera (Grape), partial (37%) [TC184551]	AT1G32190	alpha/beta-Hydrolases superfamily protein; FUNCTIONS IN: hydrolase activity; INVOLVED IN: N-terminal protein myristoylation; LOCATED IN: plasma membrane; EXPRESSED IN: 14 plant structures; EXPRESSED DURING: 8 growth stages; CONTAINS InterPro DOMAIN/s: Pho
A_46_P282553	1.75182	1.73691	2.03064
A_46_P323606	9.35231	9.23349	9.37054	AAC98056.1 - Arabidopsis thaliana (Mouse-ear cress), partial (30%) [TC180739]	AT5G13560	unknown protein; BEST Arabidopsis thaliana protein match is: unknown protein (TAIR:AT2G37370.1); Has 12055 Blast hits to 8846 proteins in 811 species: Archae - 217; Bacteria - 1046; Metazoa - 6104; Fungi - 1115; Plants - 528; Viruses - 14; Other Eukaryote
A_46_P268568	3.02761	3.20466	2.50354	Rep: UPF0057 membrane protein At2g24040 - Arabidopsis thaliana (Mouse-ear cress), complete [TC198228]	AT2G24040	Low temperature and salt responsive protein family; INVOLVED IN: response to cold, hyperosmotic salinity response; LOCATED IN: endomembrane system, integral to membrane; EXPRESSED IN: 22 plant structures; EXPRESSED DURING: 13 growth stages; CONTAINS Inter
A_46_P269773	5.76905	5.07847	2.72198	Rep: O-methyltransferase-like protein - Arabidopsis thaliana (Mouse-ear cress), partial (96%) [TC181219]	AT4G35160	O-methyltransferase family protein; FUNCTIONS IN: methyltransferase activity, O-methyltransferase activity, protein dimerization activity; LOCATED IN: cytosol; CONTAINS InterPro DOMAIN/s: Winged helix-turn-helix transcription repressor DNA-binding (InterP
A_46_P102284	3.11558	4.02288	3.87818	BNARO6GH_T3_025_C04_07DEC2006_028 Brassica napus BNARO6GH Brassica napus cDNA 5', mRNA sequence [ES911015]
A_46_P279958	1.84848	2.40049	2.11085		AT4G31310	AIG2-like (avirulence induced gene) family protein; CONTAINS InterPro DOMAIN/s: Butirosin biosynthesis, BtrG-like (InterPro:IPR013024), AIG2-like (InterPro:IPR009288); BEST Arabidopsis thaliana protein match is: AIG2-like (avirulence induced gene) family
A_46_P315810	1.44983	2.02151	1.94743	Rep: Genomic DNA, chromosome 5, TAC clone: K19B1 - Arabidopsis thaliana (Mouse-ear cress), partial (83%) [TC186175]	AT5G62460	RING/FYVE/PHD zinc finger superfamily protein; FUNCTIONS IN: zinc ion binding; EXPRESSED IN: 23 plant structures; EXPRESSED DURING: 15 growth stages; CONTAINS InterPro DOMAIN/s: Protein of unknown function DUF3675 (InterPro:IPR022143), Zinc finger, C3HC4
A_46_P263898	2.03097	1.86405	1.87035		AT4G38730	Protein of unknown function (DUF803); CONTAINS InterPro DOMAIN/s: Protein of unknown function DUF803 (InterPro:IPR008521); BEST Arabidopsis thaliana protein match is: Protein of unknown function (DUF803) (TAIR:AT2G21120.1); Has 1281 Blast hits to 1255 pro
A_46_P245039	1.43638	2.42159	1.81839	Rep: Heat stress transcription factor C-1 - Arabidopsis thaliana (Mouse-ear cress), partial (19%) [TC201348]	AT3G24520	member of Heat Stress Transcription Factor (Hsf) family
A_46_P039816	93.5943	196.66	214.09	55ACACPE_UP_007_C01_25AUG2004_011 Brassica napus AC Excell Brassica napus cDNA 5', mRNA sequence [EE410208]
A_46_P007691	1.36482	1.39387	3.86103	BNARO6GH_T3_007_A02_6DEC2006_016 Brassica napus BNARO6GH Brassica napus cDNA 5', mRNA sequence [ES908927]
A_46_P240124	1.24853	1.61457	2.35063	Rep: Peroxidase 34 precursor - Arabidopsis thaliana (Mouse-ear cress), partial (98%) [TC172904]	AT3G49110	Class III peroxidase Perx33. Expressed in roots. Located in the cell wall. Involved in cell elongation. Expression activated by light. May play a role in generating H2O2 during defense response.
A_46_P090591	3.01449	3.2045	3.40203	0201468 Brassica napus Undamaged cotyledons Brassica napus cDNA, mRNA sequence [EV187261]	AT4G36520	Chaperone DnaJ-domain superfamily protein; FUNCTIONS IN: heat shock protein binding; CONTAINS InterPro DOMAIN/s: Heat shock protein DnaJ, N-terminal (InterPro:IPR001623); BEST Arabidopsis thaliana protein match is: Chaperone DnaJ-domain superfamily protei
A_46_P188194	5.88927	5.87306	6.8691	0149403 Brassica napus Etiolated seedlings (pSPORT1) Brassica napus cDNA, mRNA sequence [EV179088]
A_46_P309420	14.1869	8.71984	10.5241	Rep: Hydroxymethylglutaryl-CoA reductase - Raphanus sativus (Radish), partial (17%) [TC165886]	AT1G76490	Encodes a 3-hydroxy-3-methylglutaryl coenzyme A reductase, which is involved in melavonate biosynthesis and performs the first committed step in isoprenoid biosynthesis. Expression is activated in dark in leaf tissue but not controlled by light in the roo
A_46_P275708	2.05957	2.11419	2.01894	Rep: F14N23.5 - Arabidopsis thaliana (Mouse-ear cress), partial (39%) [TC187590]	AT1G10170	Encodes AtNFXL1, a homologue of the putative human transcription repressor NF-X1. Functions as a negative regulator of the trichothecene phytotoxin-induced defense response.
A_46_P261453	2.03574	2.30367	2.23435
A_46_P331500	2.12828	-1.33818	-2.28705	Rep: Chromosome chr3 scaffold_117, whole genome shotgun sequence - Vitis vinifera (Grape), partial (86%) [TC186818]	AT2G41420	proline-rich family protein; LOCATED IN: plasma membrane; EXPRESSED IN: 23 plant structures; EXPRESSED DURING: 15 growth stages; Has 12775 Blast hits to 6141 proteins in 617 species: Archae - 8; Bacteria - 1509; Metazoa - 4530; Fungi - 1572; Plants - 2511
A_46_P000041	2.81673	2.60384	2.7289	Rep: 40S ribosomal protein S12-1 - Arabidopsis thaliana (Mouse-ear cress), complete [TC168479]
A_46_P085451	2.40368	2.09999	1.83008	72ETGS24_UP_021_C02_20MAY2005_012 72ETGS24 Brassica napus cDNA 5', mRNA sequence [EE444603]
A_46_P366590	584.637	580.136	1253.59	Rep: Glucan endo-1,3-beta-glucosidase-like protein 1 precursor - Arabidopsis thaliana (Mouse-ear cress), partial (81%) [TC194662]	AT3G58100	Encodes a member of the X8-GPI family of proteins. It localizes to the plasmodesmata and is predicted to bind callose.
A_46_P341865	4.57439	2.59972	2.60331	Rep: AT4g10060/T5L19_190 - Arabidopsis thaliana (Mouse-ear cress), partial (22%) [TC193910]	AT4G10060	Beta-glucosidase, GBA2 type family protein; FUNCTIONS IN: catalytic activity, glucosylceramidase activity; INVOLVED IN: glucosylceramide catabolic process, sphingolipid metabolic process; LOCATED IN: vacuole; EXPRESSED IN: 21 plant structures; EXPRESSED D
A_46_P024556	2.18602	2.17653	2.19261	63JKCOT5_T3_027_E10_24JAN2005_072 63JKCOT5 Brassica napus cDNA 5', mRNA sequence [DY022229]	AT5G37370	encodes a putative splicing factor. Over-expression in yeast and Arabidopsis result in increased tolerance to high salt.
A_46_P328770	15.6309	20.5598	22.0649		AT1G54380	spliceosome protein-related; FUNCTIONS IN: molecular_function unknown; INVOLVED IN: spliceosome assembly, nuclear mRNA splicing, via spliceosome; LOCATED IN: cellular_component unknown; EXPRESSED IN: 22 plant structures; EXPRESSED DURING: 13 growth stages
A_46_P018541	413.984	310.568	447.079	0130715 Brassica napus Root library Brassica napus cDNA, mRNA sequence [EV125403]	AT5G13510	Ribosomal protein L10 family protein; FUNCTIONS IN: structural constituent of ribosome; INVOLVED IN: translation, ribosome biogenesis; LOCATED IN: cytosolic ribosome, ribosome, chloroplast, chloroplast stroma; EXPRESSED IN: 23 plant structures; EXPRESSED
A_46_P350435	2.1283	2.10237	1.77177	Rep: F6F3.12 protein - Arabidopsis thaliana (Mouse-ear cress), partial (8%) [TC198890]
A_46_P281153	1.54448	1.55351	2.29415
A_46_P326405	2.05254	2.68314	1.85732	Rep: 70kD heat shock protein - Arabidopsis thaliana (Mouse-ear cress), partial (9%) [TC183029]
A_46_P293533	4.35577	4.13118	3.4685
A_46_P204034	2.11244	1.38364	1.49894
A_46_P279438	1.92454	1.67486	2.09613
A_46_P082601	66.6006	37.5284	87.4439	35ETGS60_UP_001_A08_24MAR2004_064 Brassica napus 35ETGS60 Brassica napus cDNA 5', mRNA sequence [EE431138]	AT3G06840	unknown protein; BEST Arabidopsis thaliana protein match is: unknown protein (TAIR:AT5G49170.1); Has 33 Blast hits to 33 proteins in 9 species: Archae - 0; Bacteria - 0; Metazoa - 0; Fungi - 0; Plants - 33; Viruses - 0; Other Eukaryotes - 0 (source: NCBI
A_46_P160509	2.00526	2.18223	2.05334	Rep: Adenine phosphoribosyltransferase (EC 2.4.2.7)-like protein - Arabidopsis thaliana (Mouse-ear cress), complete [TC169411]	AT4G22570	Encodes an adenine phosphoribosyltransferase (APT; EC 2.4.2.7), which is a constitutively expressed enzyme involved in the one-step salvage of adenine to AMP. APT3 has higher affinity for zeatin, isopentenyladenine and benzyladenine than APT1 but lower Vm
A_46_P027831	2.01183	1.39617	2.4628	BN25.062B07F011130 BN25 Brassica napus cDNA clone BN25062B07, mRNA sequence [CD825872]
A_46_P066321	-1.1657	1.6282	2.56864	BNSCS2CT_UP_028_D10_07JAN2005_074 Brassica napus seed coat BNSCS2CT Brassica napus cDNA 5', mRNA sequence [EE464478]
A_46_P377485	1.79629	2.11623	1.93893	Rep: ZW9 protein - Arabidopsis thaliana (Mouse-ear cress), partial (85%) [TC181713]	AT1G58270	ZW9 mRNA, complete cds
A_46_P345095	2.05319	1.91215	2.30811	63JKCOT5_T3_005_A01_04JAN2005_015 63JKCOT5 Brassica napus cDNA 5', mRNA sequence [DY017585]	AT4G32470	Cytochrome bd ubiquinol oxidase, 14kDa subunit; FUNCTIONS IN: ubiquinol-cytochrome-c reductase activity; INVOLVED IN: mitochondrial electron transport, ubiquinol to cytochrome c; LOCATED IN: mitochondrion, plasma membrane, plastid, mitochondrial respirato
A_46_P106984	1.90543	2.50236	2.48436	BNAEN3GH_UP_208_B01_27NOV2006_013 Brassica napus BNAEN3GH Brassica napus cDNA 5', mRNA sequence [EV006903]	AT5G08170	EMBRYO DEFECTIVE 1873 (EMB1873); CONTAINS InterPro DOMAIN/s: Agmatine deiminase (InterPro:IPR017754), Peptidyl-arginine deiminase, Porphyromonas-type (InterPro:IPR007466); Has 2547 Blast hits to 2545 proteins in 784 species: Archae - 10; Bacteria - 1723;
A_46_P242224	35.4789	40.9095	54.9836
A_46_P042596	2.02085	1.60436	1.80261	59ACAB6_UP_027_A07_23JUL2004_063 Brassica napus 59ACAB6 Brassica napus cDNA 5', mRNA sequence [EE421851]	AT3G57530	Calcium-dependent Protein Kinase. ABA signaling component that regulates the ABA-responsive gene expression via ABF4. AtCPK32 has autophosphorylation activity and can phosphorylate ABF4 in vitro
A_46_P129979	2.77029	15.045	16.3058	BN18DYSC_UP_068_B12_28FEB2008_094 BN18DYSC Brassica napus cDNA 5', mRNA sequence [FG558858]
A_46_P176939	2.25736	2.23475	2.15414	Rep: Pitrilysin - Arabidopsis thaliana (Mouse-ear cress), partial (31%) [TC166153]	AT5G42390	Insulinase (Peptidase family M16) family protein; FUNCTIONS IN: metalloendopeptidase activity, zinc ion binding, catalytic activity, metal ion binding; INVOLVED IN: proteolysis; LOCATED IN: mitochondrion, chloroplast stroma, chloroplast; EXPRESSED IN: 24
A_46_P367015	1.97447	2.81476	2.01483		AT5G43570	Predicted to encode a PR (pathogenesis-related) peptide that belongs to the PR-6 proteinase inhibitor family. Six putative PR-6-type protein encoding genes are found in Arabidopsis: At2g38900, At2g38870, At5g43570, At5g43580, At3g50020 and At3g46860.
A_46_P037311	2.12481	1.68493	1.74527	0119002 Brassica napus Root library Brassica napus cDNA, mRNA sequence [EV113690]	AT2G43360	Catalyzes the conversion of dethiobiotin to biotin.
A_46_P249099	8.32874	-8.11205	-9.15162	Rep: Glucosyl transferase-like protein - Brassica rapa subsp. pekinensis (Chinese cabbage), complete [TC207046]	AT3G11340	UDP-Glycosyltransferase superfamily protein; FUNCTIONS IN: transferase activity, transferring hexosyl groups, UDP-glycosyltransferase activity; INVOLVED IN: metabolic process; LOCATED IN: endomembrane system; EXPRESSED IN: 8 plant structures; EXPRESSED DU
A_46_P361095	95.1231	32.7515	36.22	Rep: Biotin synthase - Arabidopsis thaliana (Mouse-ear cress), partial (7%) [TC204127]	AT2G43360	Catalyzes the conversion of dethiobiotin to biotin.
A_46_P234634	3.29324	2.32152	1.63604	70-E024789-021-015-P01q-frev ADIS-MPIZ 021 Brassica napus cDNA clone MPIZp1022P0115Q, mRNA sequence [CX189858]	AT5G44380	FAD-binding Berberine family protein; FUNCTIONS IN: electron carrier activity, oxidoreductase activity, FAD binding, catalytic activity; INVOLVED IN: response to oxidative stress; LOCATED IN: cell wall; EXPRESSED IN: shoot apex, hypocotyl, sepal, root, st
A_46_P187654	2.3884	2.26004	2.46851	Rep: F5O11.6 - Arabidopsis thaliana (Mouse-ear cress), partial (17%) [TC208517]	AT1G12330	unknown protein; INVOLVED IN: biological_process unknown; LOCATED IN: chloroplast; EXPRESSED IN: 21 plant structures; EXPRESSED DURING: 12 growth stages; BEST Arabidopsis thaliana protein match is: unknown protein (TAIR:AT5G12900.1); Has 249 Blast hits to
A_46_P030446	2.24541	1.29639	1.17216	0181265 Brassica napus Leaf library Brassica napus cDNA, mRNA sequence [EV100591]	AT5G63140	purple acid phosphatase 29 (PAP29); FUNCTIONS IN: protein serine/threonine phosphatase activity, acid phosphatase activity; LOCATED IN: endomembrane system; EXPRESSED IN: 23 plant structures; EXPRESSED DURING: 13 growth stages; CONTAINS InterPro DOMAIN/s:
A_46_P107549	2.01889	2.21397	2.06074	BNSCS1CT_UP_088_D09_19APR2007_073 Brassica napus BNSCS1CT Brassica napus cDNA 5', mRNA sequence [EV016176]	AT1G09790	COBRA-like protein 6 precursor (COBL6); CONTAINS InterPro DOMAIN/s: Glycosyl-phosphatidyl inositol-anchored, plant (InterPro:IPR006918), COBRA-like (InterPro:IPR017391); BEST Arabidopsis thaliana protein match is: COBRA-like protein 1 precursor (TAIR:AT3G
A_46_P322010	2.04001	2.44183	1.57788	Rep: Chromosome chr15 scaffold_37, whole genome shotgun sequence - Vitis vinifera (Grape), partial (50%) [TC179267]	AT2G45260	Plant protein of unknown function (DUF641); FUNCTIONS IN: molecular_function unknown; INVOLVED IN: biological_process unknown; LOCATED IN: plasma membrane; EXPRESSED IN: cultured cell; CONTAINS InterPro DOMAIN/s: Protein of unknown function DUF641, plant
A_46_P050791	2.04177	2.27755	2.32701	24RDBNH_UP_061_B01_01NOV2005_013 Brassica napus 24RDBNH Brassica napus cDNA 5', mRNA sequence [EE508859]
A_46_P244434	1.67892	2.00619	1.66655
A_46_P032306	182.521	172.808	107.693	BNSCS3CT_UP_272_A07_19MAY2007_063 Brassica napus BNSCS3CT Brassica napus cDNA 5', mRNA sequence [EV058439]
A_46_P203859	2.40616	1.92422	1.79987	Rep: AT4g22410/F7K2_7 - Arabidopsis thaliana (Mouse-ear cress), partial (41%) [TC184011]	AT4G22350	Ubiquitin C-terminal hydrolases superfamily protein; FUNCTIONS IN: ubiquitin thiolesterase activity, zinc ion binding; INVOLVED IN: ubiquitin-dependent protein catabolic process; EXPRESSED IN: male gametophyte, pollen tube; EXPRESSED DURING: L mature poll
A_46_P343485	9.43145	11.2378	11.3062	Rep: At5g19340 - Arabidopsis thaliana (Mouse-ear cress), partial (59%) [TC194881]	AT5G19340	unknown protein; BEST Arabidopsis thaliana protein match is: unknown protein (TAIR:AT3G05980.1); Has 1000 Blast hits to 906 proteins in 61 species: Archae - 0; Bacteria - 4; Metazoa - 62; Fungi - 36; Plants - 128; Viruses - 4; Other Eukaryotes - 766 (sour
A_46_P203869	3.04934	3.10469	2.72807
A_46_P254539	4.01075	2.87266	1.82359	Rep: CHR11 (CHROMATIN-REMODELING PROTEIN 11); DNA-dependent ATPase - Arabidopsis thaliana, partial (50%) [TC191266]
A_46_P263793	4.82074	5.44719	5.69252
A_46_P016891	9.91193	9.72679	9.32632	0077367 Brassica napus Bud library Brassica napus cDNA, mRNA sequence [EV153507]
A_46_P317960	3.42137	3.47022	2.55722	Rep: BEL1-like homeodomain protein 3 - Arabidopsis thaliana (Mouse-ear cress), partial (65%) [TC175334]
A_46_P235279	2.0906	1.95799	1.84321		AT1G74240	Mitochondrial substrate carrier family protein; FUNCTIONS IN: binding; INVOLVED IN: transport, mitochondrial transport, transmembrane transport; LOCATED IN: mitochondrial inner membrane, membrane; EXPRESSED IN: 11 plant structures; EXPRESSED DURING: 6 gro
A_46_P266418	2.03429	2.33707	2.23335	Rep: Chromosome undetermined scaffold_183, whole genome shotgun sequence - Vitis vinifera (Grape), partial (69%) [TC164222]	AT5G23280	TCP family transcription factor ; CONTAINS InterPro DOMAIN/s: Transcription factor, TCP (InterPro:IPR005333), Transcription factor TCP subgroup (InterPro:IPR017887); BEST Arabidopsis thaliana protein match is: TCP family transcription factor (TAIR:AT5G08
A_46_P273253	1.83152	2.05977	1.63332	Rep: Chromosome undetermined scaffold_222, whole genome shotgun sequence - Vitis vinifera (Grape), partial (43%) [TC181895]	AT4G20850	Tripeptidyl Peptidase II. Ser protease that assembles into a large oligomeric complex containing two proteins of 153 and 142 kD that are derived from a single TPP2 gene, with the smaller version missing part of the C-terminal end. Not essential, based on
A_46_P380923	1.92351	1.61054	2.41141	Rep: Expressed protein - Arabidopsis thaliana (Mouse-ear cress), partial (30%) [TC212496]	AT2G42400	vascular plant one zinc finger protein 2 (VOZ2); BEST Arabidopsis thaliana protein match is: vascular plant one zinc finger protein (TAIR:AT1G28520.2); Has 87 Blast hits to 82 proteins in 14 species: Archae - 0; Bacteria - 0; Metazoa - 0; Fungi - 0; Plant
A_46_P056376	1.46983	1.85283	2.24596	BNARO1GH_T3_026_A09_23NOV2006_079 Brassica napus BNARO1GH Brassica napus cDNA 5', mRNA sequence [ES902111]	AT4G34530	Encodes a transcription factor CIB1 (cryptochrome-interacting basic-helix-loop-helix). CIB1 interacts with CRY2 (cryptochrome 2) in a blue light-specific manner in yeast and Arabidopsis cells, and it acts together with additional CIB1-related proteins to
A_46_P231119	8.50131	5.69652	4.21295	Rep: F14D16.17 - Arabidopsis thaliana (Mouse-ear cress), partial (50%) [TC204582]	AT1G19025	DNA repair metallo-beta-lactamase family protein; CONTAINS InterPro DOMAIN/s: DNA repair metallo-beta-lactamase (InterPro:IPR011084); BEST Arabidopsis thaliana protein match is: DNA repair metallo-beta-lactamase family protein (TAIR:AT1G27410.1); Has 1078
A_46_P084496	3.39169	3.98999	3.90055	6ETGS6H_UP_009_G11_15NOV2004_083 Brassica napus 6ETGS6h Brassica napus cDNA 5', mRNA sequence [EE440077]	AT1G16800	P-loop containing nucleoside triphosphate hydrolases superfamily protein; BEST Arabidopsis thaliana protein match is: P-loop containing nucleoside triphosphate hydrolases superfamily protein (TAIR:AT4G30100.1); Has 9771 Blast hits to 8579 proteins in 1344
A_46_P166599	97.0172	88.5792	119.133	Rep: 60S ribosomal protein L39-1 - Arabidopsis thaliana (Mouse-ear cress), complete [TC201148]	AT4G31985	Ribosomal protein L39 family protein; FUNCTIONS IN: structural constituent of ribosome; INVOLVED IN: translation; LOCATED IN: ribosome, cytosolic large ribosomal subunit; EXPRESSED IN: 23 plant structures; EXPRESSED DURING: 13 growth stages; CONTAINS Inte
A_46_P376575	1.98726	1.56469	2.07113	Rep: SGT1a - Arabidopsis thaliana (Mouse-ear cress), partial (20%) [TC210653]	AT4G23570	Closely related to SGT1B, may function in SCF(TIR1) mediated protein degradation. AtSGT1a and AtSGT1b are functionally redundant in the resistance to pathogenes. AtSGT1b was more highly expressed than AtSGT1. The N-terminal TPR domain of AtSGT1a reduces
A_46_P223924	394.152	302.888	115.018		AT5G59460	scarecrow-like transcription factor 11 (SCL11); CONTAINS InterPro DOMAIN/s: M-phase phosphoprotein 6 (InterPro:IPR019324); Has 30201 Blast hits to 17322 proteins in 780 species: Archae - 12; Bacteria - 1396; Metazoa - 17338; Fungi - 3422; Plants - 5037; V
A_46_P263178	2.12717	1.44878	1.49672		AT1G63780	Small nucleolar ribonucleoprotein protein involved in ribosomal RNA processing. Located in nucleolus and cajal bodies.
A_46_P254534	2.95851	3.91437	3.26699	Rep: Chitinase-like protein - Arabidopsis thaliana (Mouse-ear cress), partial (80%) [TC185900]	AT4G19810	ChiC encodes a Class V chitinase that is a part of glycoside hydrolase family 18 based on CAZy groupings. It appears to primarily act as an exochitinase in vitro where it predominantly cleaves a chitobiose (GlcNAc)2 residue from the non-reducing end of a
A_46_P336785	11.6051	14.9612	14.696	Rep: At1g27150/T7N9_21 - Arabidopsis thaliana (Mouse-ear cress), partial (27%) [TC190635]	AT1G27150	Tetratricopeptide repeat (TPR)-like superfamily protein; FUNCTIONS IN: binding; INVOLVED IN: biological_process unknown; LOCATED IN: cellular_component unknown; EXPRESSED IN: 23 plant structures; EXPRESSED DURING: 13 growth stages; CONTAINS InterPro DOMAI
A_46_P088346	1.88739	3.36635	2.89591	BNZB_UP_084_B06_03JUN2004_046 Brassica napus BNZB Brassica napus cDNA 5', mRNA sequence [EE562553]
A_46_P150344	1.74072	2.19418	1.87771	Rep: Chromosome chr13 scaffold_210, whole genome shotgun sequence - Vitis vinifera (Grape), partial (38%) [TC198967]
A_46_P331830	1.86087	2.37754	4.19382	AAF13095.1 - Arabidopsis thaliana (Mouse-ear cress), partial (10%) [TC187044]
A_46_P262688	3.75065	3.62616	2.8214		AT1G01860	dimethyladenosine transferase
A_46_P271713	2.41409	2.93789	2.88708	Rep: ARF-GAP - Arabidopsis thaliana (Mouse-ear cress), partial (31%) [TC174401]	AT5G13300	Belongs to 15-member small GTPase gene family, ARF-GAP domain proteins (AGD); corresponds to AGD3, and is one of four proteins belonging to class 1, together with AGD1, AGD2 and AGD4. The protein contains four domains: BAR domain, PH domain, an ARF-GAP do
A_46_P039256	4.19025	1.36464	3.1083	Rep: Phenylalanine ammonia-lyase 4 - Arabidopsis thaliana (Mouse-ear cress), complete [TC178926]	AT3G10340	Encodes PAL4, a putative a phenylalanine ammonia-lyase. Arabidopsis has four PALs: AT2G37040 (PAL1), AT3G53260 (PAL2), AT5G04230 (PAL3) and AT3G10340 (PAL4).
A_46_P365135	54.8048	54.424	52.7978	Rep: Chromosome undetermined scaffold_91, whole genome shotgun sequence - Vitis vinifera (Grape), partial (23%) [TC205949]	AT5G52540	Protein of unknown function (DUF819); LOCATED IN: chloroplast envelope; EXPRESSED IN: 22 plant structures; EXPRESSED DURING: 13 growth stages; CONTAINS InterPro DOMAIN/s: Protein of unknown function DUF819 (InterPro:IPR008537); BEST Arabidopsis thaliana p
A_46_P025736	3.95306	4.32336	4.02252	0158497 Brassica napus Etiolated seedlings (Uni-ZAP) Brassica napus cDNA, mRNA sequence [EV174313]	AT4G28370	RING/U-box superfamily protein; FUNCTIONS IN: zinc ion binding; INVOLVED IN: biological_process unknown; LOCATED IN: endomembrane system; EXPRESSED IN: 22 plant structures; EXPRESSED DURING: 13 growth stages; CONTAINS InterPro DOMAIN/s: Zinc finger, RING-
A_46_P372800	2.74984	5.58883	2.64443	Rep: 60S ribosomal protein L19-3 - Arabidopsis thaliana (Mouse-ear cress), partial (80%) [TC209245]	AT4G02230	Ribosomal protein L19e family protein; FUNCTIONS IN: structural constituent of ribosome; INVOLVED IN: translation, ribosome biogenesis; LOCATED IN: cytosolic ribosome, ribosome, cytosolic large ribosomal subunit, plasma membrane; EXPRESSED IN: 24 plant st
A_46_P254179	2.55521	2.6234	2.55512		AT4G39980	Encodes a 2-deoxy-D-arabino-heptulosonate 7-phosphate (DAHP) synthase, which catalyzes the first committed step in aromatic amino acid biosynthesis. Gene expression is induced by wounding and pathogenic bacteria Pseudomonas syringae.
A_46_P024136	7.77878	-1.68869	-2.03113	63JKCOT5_T3_010_B10_04JAN2005_078 63JKCOT5 Brassica napus cDNA 5', mRNA sequence [DY018045]	AT5G45890	Senescence-associated gene 12 (SAG12) encoding a cysteine protease influenced by cytokinin, auxin, and sugars.Localized to special vacuole found during senescence called senescence associated vacuoles which are different from central vacuole in the tonopl
A_46_P170809	14.9293	17.9833	3.37589
A_46_P042486	1.29167	1.76187	2.02019	BNDH4DCT_UP_001_E09_17DEC2004_071 Brassica napus seeds BNDH4DCT Brassica napus cDNA 5', mRNA sequence [DW999563]	AT4G34220	Leucine-rich repeat protein kinase family protein; FUNCTIONS IN: protein serine/threonine kinase activity, protein kinase activity, ATP binding; INVOLVED IN: transmembrane receptor protein tyrosine kinase signaling pathway, protein amino acid phosphorylat
A_46_P298200	66.0022	84.3366	59.6963		AT3G06778	Chaperone DnaJ-domain superfamily protein; FUNCTIONS IN: unfolded protein binding, heat shock protein binding; INVOLVED IN: protein folding; LOCATED IN: cellular_component unknown; CONTAINS InterPro DOMAIN/s: Molecular chaperone, heat shock protein, Hsp40
A_46_P142759	4.94693	5.99001	7.04096		AT2G30230	unknown protein; FUNCTIONS IN: molecular_function unknown; INVOLVED IN: biological_process unknown; LOCATED IN: endomembrane system; BEST Arabidopsis thaliana protein match is: unknown protein (TAIR:AT1G06980.1); Has 167 Blast hits to 167 proteins in 14 s
A_46_P233684	2.9092	2.78972	2.8549	Rep: 60S ribosomal protein L5-1 - Arabidopsis thaliana (Mouse-ear cress), partial (90%) [TC193499]	AT3G25520	Encodes ribosomal protein L5 that binds to 5S ribosomal RNA and in involved in its export from the nucleus to the cytoplasm. Identified in a screen for enhancers of as1. as1/pgy double mutants show defects in leaf vascular patterning and adaxial cell fate
A_46_P131589	3.10481	2.96674	3.4206	Rep: Chromosome chr4 scaffold_6, whole genome shotgun sequence - Vitis vinifera (Grape), complete [TC174015]	AT4G32930	unknown protein; FUNCTIONS IN: molecular_function unknown; INVOLVED IN: biological_process unknown; LOCATED IN: cellular_component unknown; EXPRESSED IN: 22 plant structures; EXPRESSED DURING: 13 growth stages; CONTAINS InterPro DOMAIN/s: Protein of unkno
A_46_P167544	4.1628	3.17814	2.85516	0141310 Brassica napus Early anther Brassica napus cDNA, mRNA sequence [EV151388]
A_46_P144499	197.809	130.915	106.414		AT5G12190	RNA-binding (RRM/RBD/RNP motifs) family protein; FUNCTIONS IN: RNA binding, nucleotide binding, nucleic acid binding; INVOLVED IN: biological_process unknown; EXPRESSED IN: 24 plant structures; EXPRESSED DURING: 13 growth stages; CONTAINS InterPro DOMAIN/
A_46_P278913	2.18234	1.61261	1.58997		AT3G22200	Genetically redundant with POP3;mediates pollen tube guidance. Double mutants are self sterile; gamma-aminobutyrate transaminase subunit precursor; nuclear gene for mitochondrial product. Encodes gamma-aminobutyrate transaminase that uses pyruvate instead
A_46_P318255	2.98864	5.59473	3.86328	Rep: PEARLI 1-like protein - Arabidopsis thaliana (Mouse-ear cress), complete [TC175573]	AT4G12510	Bifunctional inhibitor/lipid-transfer protein/seed storage 2S albumin superfamily protein; FUNCTIONS IN: lipid binding; INVOLVED IN: lipid transport; LOCATED IN: endomembrane system; CONTAINS InterPro DOMAIN/s: Bifunctional inhibitor/plant lipid transfer
A_46_P061441	2.21586	1.63342	1.36928	56ACAC48_UP_024_H06_16DEC2004_034 Brassica napus Brassica napus cDNA 5', mRNA sequence [EE414041]	AT5G53930	unknown protein; LOCATED IN: chloroplast; Has 1807 Blast hits to 1807 proteins in 277 species: Archae - 0; Bacteria - 0; Metazoa - 736; Fungi - 347; Plants - 385; Viruses - 0; Other Eukaryotes - 339 (source: NCBI BLink).
A_46_P248824	2.08726	1.83652	1.82203	0143481 Brassica napus Etiolated seedlings (Uni-ZAP) Brassica napus cDNA, mRNA sequence [EV166671]	AT5G66680	Encodes a protein ortholog of human SOT48 or yeast WBP1, an essential protein subunit of the oligosaccharyltransferase (OST) complex, which is responsible for the transfer in the ER of the N-linked glycan precursor onto Asn residues of candidate proteins.
A_46_P085556	-1.01568	1.66672	4.35832	73ETGS36_UP_007_D07_20MAY2005_057 73ETGS36 Brassica napus cDNA 5', mRNA sequence [EE445240]	AT4G39795	Protein of unknown function (DUF581); CONTAINS InterPro DOMAIN/s: Protein of unknown function DUF581 (InterPro:IPR007650); BEST Arabidopsis thaliana protein match is: Protein of unknown function (DUF581) (TAIR:AT1G22160.1); Has 498 Blast hits to 498 prote
A_46_P361835	2.16947	1.75016	2.25118	Rep: RNA-binding protein cp33 - Arabidopsis thaliana (Mouse-ear cress), partial (76%) [TC204486]	AT3G52380	chloroplast RNA-binding protein
A_46_P296253	3.89542	1.83091	2.21632
A_46_P217974	1.56674	2.00533	1.50654	Rep: Similarity to transcription-associated zinc ribbon protein - Arabidopsis thaliana (Mouse-ear cress), complete [TC186008]	AT3G25940	TFIIB zinc-binding protein; FUNCTIONS IN: transcription regulator activity, DNA binding, sequence-specific DNA binding transcription factor activity, zinc ion binding, nucleic acid binding; INVOLVED IN: RNA elongation, regulation of transcription, DNA-dep
A_46_P053141	2.5404	2.7914	2.45963	54ACDHPE_UP_005_E02_24AUG2004_008 Brassica napus DH12075 PEG Brassica napus cDNA 5', mRNA sequence [DY001562]	AT5G22690	Disease resistance protein (TIR-NBS-LRR class) family; FUNCTIONS IN: transmembrane receptor activity, ATP binding; INVOLVED IN: signal transduction, defense response, apoptosis, innate immune response; LOCATED IN: intrinsic to membrane; EXPRESSED IN: 20 p
A_46_P266058	2.0447	1.52928	1.57746
A_46_P192234	49.2554	66.0364	39.4626
A_46_P161464	2.62996	2.24373	1.6901	BNSCS2CT_UP_157_D11_23APR2007_089 Brassica napus BNSCS2CT Brassica napus cDNA 5', mRNA sequence [EV027286]
A_46_P263068	2.21423	1.81072	1.83741	0122560 Brassica napus Root library Brassica napus cDNA, mRNA sequence [EV117248]	AT1G47210	cyclin-dependent protein kinase 3;2 (CYCA3;2); CONTAINS InterPro DOMAIN/s: Cyclin, C-terminal (InterPro:IPR004367), Cyclin (InterPro:IPR006670), G2/mitotic-specific cyclin A (InterPro:IPR015453), Cyclin-like (InterPro:IPR011028), Cyclin-related (InterPro:
A_46_P173654	5.10979	5.69143	5.05978	Rep: Chromosome undetermined scaffold_186, whole genome shotgun sequence - Vitis vinifera (Grape), partial (18%) [TC192271]	AT5G45630	CONTAINS InterPro DOMAIN/s: Protein of unknown function DUF584 (InterPro:IPR007608); BEST Arabidopsis thaliana protein match is: AtS40-3 (TAIR:AT4G18980.1); Has 158 Blast hits to 158 proteins in 19 species: Archae - 0; Bacteria - 0; Metazoa - 0; Fungi - 0
A_46_P192509	1.91558	2.12991	2.67422	Rep: At4g32285 - Arabidopsis thaliana (Mouse-ear cress), partial (59%) [TC174336]
A_46_P237514	6.96253	2.31877	3.06837	Rep: Expressed protein - Oryza sativa subsp. japonica (Rice), partial (74%) [TC202899]	AT4G10330	glycine-rich protein; Has 3957 Blast hits to 1040 proteins in 164 species: Archae - 18; Bacteria - 176; Metazoa - 2052; Fungi - 68; Plants - 1288; Viruses - 62; Other Eukaryotes - 293 (source: NCBI BLink).
A_46_P141639	2.49011	1.77927	1.56648
A_46_P192704	1.87175	1.70094	2.77469
A_46_P337955	2.66475	2.98393	1.75646	Rep: D-xylose-proton symporter-like 1 - Arabidopsis thaliana (Mouse-ear cress), partial (85%) [TC184324]	AT3G03090	Encodes a vacuolar membrane-localized glucose transporter that can also transport fructose. Mutations in these gene have effects on seed germination and time to flowering.
A_46_P347380	1.23654	1.26598	2.005	AAD24370.1 - Arabidopsis thaliana (Mouse-ear cress), partial (32%) [TC197224]	AT5G59730	A member of EXO70 gene family, putative exocyst subunits, conserved in land plants. Arabidopsis thaliana contains 23 putative EXO70 genes, which can be classified into eight clusters on the phylogenetic tree.
A_46_P000556	1.45825	1.8366	2.0146	0090665 Brassica napus Cold acclimation - dark Brassica napus cDNA, mRNA sequence [EV193182]
A_46_P150124	4.45012	3.16543	2.11612	0142654 Brassica napus Etiolated seedlings (Uni-ZAP) Brassica napus cDNA, mRNA sequence [EV165844]
A_46_P383778	2.10585	1.92523	1.68116	Rep: CTP synthase - Arabidopsis thaliana (Mouse-ear cress), partial (32%) [TC213756]	AT3G12670	embryo defective 2742 (emb2742); FUNCTIONS IN: CTP synthase activity, catalytic activity; INVOLVED IN: response to cadmium ion, embryo development ending in seed dormancy; LOCATED IN: endomembrane system; EXPRESSED IN: 23 plant structures; EXPRESSED DURIN
A_46_P331205	1.28733	2.12929	-1.01574	Rep: F5O8.2 protein - Arabidopsis thaliana (Mouse-ear cress), partial (42%) [TC186593]	AT1G23460	Pectin lyase-like superfamily protein; FUNCTIONS IN: polygalacturonase activity; INVOLVED IN: carbohydrate metabolic process; LOCATED IN: endomembrane system; CONTAINS InterPro DOMAIN/s: Pectin lyase fold/virulence factor (InterPro:IPR011050), Pectin lyas
A_46_P244504	2.15502	1.70481	1.12533
A_46_P125594	2.42086	1.60471	1.90392	0104226 Brassica napus Cold acclimation - light Brassica napus cDNA, mRNA sequence [EV203073]	AT5G06300	Putative lysine decarboxylase family protein; CONTAINS InterPro DOMAIN/s: Conserved hypothetical protein CHP00730 (InterPro:IPR005269); BEST Arabidopsis thaliana protein match is: lysine decarboxylase family protein (TAIR:AT2G37210.1); Has 5281 Blast hits
A_46_P308810	447.904	825.24	1348.66	Rep: Cellulose synthase A catalytic subunit 1 [UDP-forming] - Arabidopsis thaliana (Mouse-ear cress), partial (14%) [TC165010]	AT4G32410	Encodes a cellulose synthase isomer. CESA1 mutants have cellulose defect in the primary cell wall. Multiple lines of evidence suggest that CESA1, along with CESA3 and CESA6 are present in the same plasma membrane complex for cellulose biosynthesis. lasma
A_46_P224499	13.4453	22.3058	21.2551
A_46_P091236	2.64534	2.41665	2.59186	Brassica napus AtSK12-like protein mRNA, complete cds [DQ767687]	AT5G26751	encodes a SHAGGY-related kinase involved in meristem organization.
A_46_P268023	2.15477	1.48752	1.57295	BAA87936.1 - Arabidopsis thaliana (Mouse-ear cress), partial (47%) [TC195654]	AT3G20370	TRAF-like family protein; FUNCTIONS IN: molecular_function unknown; INVOLVED IN: biological_process unknown; LOCATED IN: membrane; EXPRESSED IN: 6 plant structures; EXPRESSED DURING: seedling growth; CONTAINS InterPro DOMAIN/s: TRAF-like (InterPro:IPR0089
A_46_P299100	2.54666	2.16622	3.99396	Rep: 25.3 kDa vesicle transport protein - Arabidopsis thaliana (Mouse-ear cress), complete [TC165419]	AT1G11890	member of SEC22 Gene Family
A_46_P033886	4.20732	1.26773	1.47953	Rep: F12A21.6 - Arabidopsis thaliana (Mouse-ear cress), partial (52%) [TC170454]	AT1G67810	Encodes a protein capable of stimulating the cysteine desulfurase activity of CpNifS (AT1G08490) in vitro. SufE2:GFP localizes to the chloroplasts where it is likely to play a role in iron-sulfur cluster assembly. Transcript levels for this gene are high
A_46_P382613	685.899	1403.45	1107.11	Rep: mRNA capping enzyme family protein - Arabidopsis thaliana, partial (21%) [TC213251]	AT3G09100	mRNA capping enzyme family protein; FUNCTIONS IN: in 7 functions; INVOLVED IN: in 7 processes; LOCATED IN: nucleus; EXPRESSED IN: 22 plant structures; EXPRESSED DURING: 13 growth stages; CONTAINS InterPro DOMAIN/s: Nucleic acid-binding, OB-fold (InterPro:
A_46_P274253	2.17164	1.5526	1.4418		AT3G33072	transposable element gene; pseudogene, hypothetical protein
A_46_P248834	8.61829	1.05336	5.67055	Rep: Small nuclear riboprotein Sm-D1 - Arabidopsis thaliana (Mouse-ear cress), partial (91%) [TC176849]
A_46_P373470	2.18533	1.03339	1.18915	Rep: Sulfotransferase-like protein - Arabidopsis thaliana (Mouse-ear cress), partial (76%) [TC209524]	AT2G03750	P-loop containing nucleoside triphosphate hydrolases superfamily protein; FUNCTIONS IN: sulfotransferase activity; INVOLVED IN: biological_process unknown; LOCATED IN: endomembrane system; EXPRESSED IN: 20 plant structures; EXPRESSED DURING: 13 growth sta
A_46_P219084	34.5252	54.3007	66.7854	Rep: T7N9.8 - Arabidopsis thaliana (Mouse-ear cress), partial (64%) [TC169736]	AT1G27020	unknown protein; BEST Arabidopsis thaliana protein match is: unknown protein (TAIR:AT1G27030.1); Has 514 Blast hits to 514 proteins in 175 species: Archae - 0; Bacteria - 311; Metazoa - 0; Fungi - 0; Plants - 65; Viruses - 0; Other Eukaryotes - 138 (sourc
A_46_P266538	2.43074	2.60972	1.89855
A_46_P359850	43.9899	41.2755	43.0682	Rep: Chromosome chr2 scaffold_112, whole genome shotgun sequence - Vitis vinifera (Grape), partial (11%) [TC203581]	AT4G23050	PAS domain-containing protein tyrosine kinase family protein; FUNCTIONS IN: protein serine/threonine/tyrosine kinase activity, protein kinase activity, signal transducer activity; INVOLVED IN: signal transduction, protein amino acid phosphorylation, regul
A_46_P326755	16.7276	-7.9654	-16.4888	Rep: Chromosome chr13 scaffold_17, whole genome shotgun sequence - Vitis vinifera (Grape), partial (40%) [TC183390]	AT3G11340	UDP-Glycosyltransferase superfamily protein; FUNCTIONS IN: transferase activity, transferring hexosyl groups, UDP-glycosyltransferase activity; INVOLVED IN: metabolic process; LOCATED IN: endomembrane system; EXPRESSED IN: 8 plant structures; EXPRESSED DU
A_46_P236484	236.041	346.328	267.787	Rep: Similarity to RNA-binding protein - Arabidopsis thaliana (Mouse-ear cress), partial (94%) [TC168963]	AT5G06210	RNA binding (RRM/RBD/RNP motifs) family protein; FUNCTIONS IN: RNA binding, nucleotide binding, nucleic acid binding; INVOLVED IN: biological_process unknown; EXPRESSED IN: 24 plant structures; EXPRESSED DURING: 13 growth stages; CONTAINS InterPro DOMAIN/
A_46_P168239	13.5819	19.3354	27.6519	0145847 Brassica napus Etiolated seedlings (Uni-ZAP) Brassica napus cDNA, mRNA sequence [EV168470]	AT1G17180	Encodes glutathione transferase belonging to the tau class of GSTs. Naming convention according to Wagner et al. (2002).
A_46_P170189	2.11052	-1.25135	-1.36267	Rep: Lectin-like protein - Arabidopsis thaliana (Mouse-ear cress), partial (96%) [TC197227]	AT3G16530	Lectin like protein whose expression is induced upon treatment with chitin oligomers.
A_46_P280388	2.49348	2.44063	1.74506	Rep: Ribosomal protein S27 - Brassica campestris (Field mustard), complete [TC190123]	AT2G45710	Zinc-binding ribosomal protein family protein; FUNCTIONS IN: structural constituent of ribosome; INVOLVED IN: translation, ribosome biogenesis; LOCATED IN: cytosolic small ribosomal subunit, cytosolic ribosome, ribosome, nucleolus, plasma membrane; EXPRES
A_46_P305769	2.08968	1.45138	1.06095	Rep: Similarity to protein kinase - Arabidopsis thaliana (Mouse-ear cress), partial (46%) [TC210455]	AT5G58940	Arabidopsis thaliana calmodulin-binding receptor-like kinase mRNA
A_46_P368970	12.0018	14.2049	12.4643	Rep: BZIP protein BZO2H1 - Arabidopsis thaliana (Mouse-ear cress), partial (66%) [TC207583]	AT4G02640	Encodes a basic leucine zipper (bZIP) transcription factor AtbZIP10. AtbZIP10 shuttles between the nucleus and the cytoplasm. It binds consensus G- and C-box DNA sequences. AtbZIP10 acts antagonistically with LSD1 in both pathogen-induced hypersensitiv
A_46_P250199	1.59904	2.25718	3.46026	Rep: RNA-binding protein-like - Arabidopsis thaliana (Mouse-ear cress), partial (9%) [TC186738]
A_46_P039246	1.36659	2.0065	1.90756	9RDBNGA_UP_003_B08_26SEP2003_062 Brassica napus - 9RDBNGA Brassica napus cDNA 5', mRNA sequence [EE541411]	AT5G59350	unknown protein; FUNCTIONS IN: molecular_function unknown; INVOLVED IN: biological_process unknown; LOCATED IN: endomembrane system; EXPRESSED IN: 23 plant structures; EXPRESSED DURING: 13 growth stages; Has 1807 Blast hits to 1807 proteins in 277 species
A_46_P267568	3.14073	2.50632	2.26008	0131593 Brassica napus Root library Brassica napus cDNA, mRNA sequence [EV126281]
A_46_P055071	10.6534	11.4268	4.04921	53COT2_T3_004_D11_28JUN2004_089 Brassica napus 36hr germinating seed library 53COT2 Brassica napus cDNA 5', mRNA sequence [DY024452]	AT5G37670	HSP20-like chaperones superfamily protein; CONTAINS InterPro DOMAIN/s: Heat shock protein Hsp20 (InterPro:IPR002068), HSP20-like chaperone (InterPro:IPR008978); BEST Arabidopsis thaliana protein match is: HSP20-like chaperones superfamily protein (TAIR:AT
A_46_P045591	1.1502	2.00335	2.21813	0193485 Brassica napus Apical meristem Brassica napus cDNA, mRNA sequence [EV095484]
A_46_P261178	2.51216	2.4207	-1.0488	BAA90353.1 - Arabidopsis thaliana (Mouse-ear cress), partial (90%) [TC213065]	AT5G04910	unknown protein; Has 71 Blast hits to 71 proteins in 36 species: Archae - 0; Bacteria - 0; Metazoa - 17; Fungi - 0; Plants - 40; Viruses - 0; Other Eukaryotes - 14 (source: NCBI BLink).
A_46_P174839	5.56353	2.16718	2.30085	Rep: paired amphipathic helix repeat-containing protein - Arabidopsis thaliana, partial (5%) [TC194590]
A_46_P232889	1.2097	1.96018	2.36269		AT3G03180	Got1/Sft2-like vescicle transport protein family; FUNCTIONS IN: molecular_function unknown; INVOLVED IN: vesicle-mediated transport; LOCATED IN: cellular_component unknown; EXPRESSED IN: 20 plant structures; EXPRESSED DURING: 13 growth stages; CONTAINS In
A_46_P279248	5.66217	4.59693	4.92029	Rep: Uncharacterized protein At5g22650.2 - Arabidopsis thaliana (Mouse-ear cress), partial (23%) [TC195298]
A_46_P278533	2.4301	2.14726	2.02017		AT4G29480	Mitochondrial ATP synthase subunit G protein; FUNCTIONS IN: hydrogen ion transmembrane transporter activity; INVOLVED IN: proton transport, ATP synthesis coupled proton transport; LOCATED IN: mitochondrion; EXPRESSED IN: 25 plant structures; EXPRESSED DUR
A_46_P339425	1.69002	2.1756	2.07841	Rep: At5g45275 - Arabidopsis thaliana (Mouse-ear cress), partial (38%) [TC194926]	AT4G19450	Major facilitator superfamily protein; FUNCTIONS IN: molecular_function unknown; INVOLVED IN: biological_process unknown; LOCATED IN: endomembrane system; EXPRESSED IN: 22 plant structures; EXPRESSED DURING: 13 growth stages; CONTAINS InterPro DOMAIN/s: N
A_46_P093806	1.90382	2.245	1.47179	BNSCS5CT_UP_118_B12_30MAY2007_094 Brassica napus BNSCS5CT Brassica napus cDNA 5', mRNA sequence [EV086142]	AT5G34851	transposable element gene; gypsy-like retrotransposon family, has a 0. P-value blast match to GB:AAD27547 polyprotein (Gypsy_Ty3-element) (Oryza sativa subsp. indica)
A_46_P339700	2.82153	1.88441	1.80124	Rep: Uncharacterized protein AF_0946 precursor - Archaeoglobus fulgidus, partial (3%) [TC192560]
A_46_P380828	2.31066	1.90373	2.23954	Rep: Chromosome chr5 scaffold_2, whole genome shotgun sequence - Vitis vinifera (Grape), partial (61%) [TC212466]	AT3G06190	BTB-POZ and MATH domain 2 (BPM2); CONTAINS InterPro DOMAIN/s: TRAF-like (InterPro:IPR008974), MATH (InterPro:IPR002083), BTB/POZ fold (InterPro:IPR011333), BTB/POZ (InterPro:IPR013069), Kelch related (InterPro:IPR013089), BTB/POZ-like (InterPro:IPR000210)
A_46_P358910	4.5327	4.97101	5.2927	Rep: Uncharacterized protein At2g43190.3 - Arabidopsis thaliana (Mouse-ear cress), partial (50%) [TC203105]
A_46_P073421	7.50751	2.53379	4.28897	BNARO5GH_T3_006_F05_30NOV2006_037 Brassica napus BNARO5GH Brassica napus cDNA 5', mRNA sequence [ES905786]
A_46_P232249	1.40829	1.66052	2.04162		AT1G17700	prenylated RAB acceptor 1.F1 (PRA1.F1); CONTAINS InterPro DOMAIN/s: Prenylated rab acceptor PRA1 (InterPro:IPR004895); BEST Arabidopsis thaliana protein match is: PRA1 (Prenylated rab acceptor) family protein (TAIR:AT1G55190.1); Has 501 Blast hits to 501
A_46_P019216	1.91859	2.09081	2.15461	BNZB_RP_026_G04_30APR2004_020 Brassica napus BNZB Brassica napus cDNA 5', mRNA sequence [EE558200]	AT1G16920	small GTP-binding protein (Rab11)similar to YPT3/RAB11 proteins in yeast and mammals, respectively. YPT3/RAB11 is involved in intracellular protein trafficking.
A_46_P226019	2.3144	1.6031	2.20707	Rep: Uncharacterized protein At4g14310.1 - Arabidopsis thaliana (Mouse-ear cress), partial (28%) [TC197654]
A_46_P085896	2.10391	3.88432	4.89947	BNSCS3CT_UP_038_F12_04MAY2007_086 Brassica napus BNSCS3CT Brassica napus cDNA 5', mRNA sequence [EV039513]	AT4G30260	Integral membrane Yip1 family protein; FUNCTIONS IN: molecular_function unknown; INVOLVED IN: biological_process unknown; LOCATED IN: plasma membrane; EXPRESSED IN: callus; CONTAINS InterPro DOMAIN/s: Yip1 domain (InterPro:IPR006977); BEST Arabidopsis tha
A_46_P359491	3.05749	2.95435	3.04312	Rep: Peptidyl-prolyl cis-trans isomerase - Arabidopsis thaliana (Mouse-ear cress), partial (24%) [TC203396]
A_46_P313865	2.05585	1.84587	1.5995	Rep: AT4g27940/T13J8_50 - Arabidopsis thaliana (Mouse-ear cress), partial (96%) [TC171201]	AT4G27940	manganese tracking factor for mitochondrial SOD2 (MTM1); FUNCTIONS IN: binding; INVOLVED IN: transport, mitochondrial transport, transmembrane transport; LOCATED IN: mitochondrial inner membrane, membrane; EXPRESSED IN: 19 plant structures; EXPRESSED DURI
A_46_P007331	1.67898	3.12794	2.31116	BNDH5DCT_UP_008_E01_16DEC2003_007 Brassica napus BNDH5DCT Brassica napus cDNA 5', mRNA sequence [CN727234]	AT3G13690	Protein kinase protein with adenine nucleotide alpha hydrolases-like domain; FUNCTIONS IN: protein tyrosine kinase activity, protein kinase activity, kinase activity, ATP binding; INVOLVED IN: protein amino acid phosphorylation; LOCATED IN: cellular_compo
A_46_P368650	2.15774	2.3606	1.64699	Rep: DEAD-box ATP-dependent RNA helicase 26 - Arabidopsis thaliana (Mouse-ear cress), partial (7%) [TC207447]	AT5G08610	P-loop containing nucleoside triphosphate hydrolases superfamily protein; FUNCTIONS IN: helicase activity, nucleic acid binding, ATP binding, ATP-dependent helicase activity; LOCATED IN: chloroplast; EXPRESSED IN: 25 plant structures; EXPRESSED DURING: 15
A_46_P009211	2.28933	1.68285	1.21187	Brassica napus peroxidase (podC) mRNA, partial cds [AY423440]	AT5G06730	Peroxidase superfamily protein; FUNCTIONS IN: peroxidase activity, heme binding; INVOLVED IN: response to oxidative stress, oxidation reduction; LOCATED IN: plasma membrane; EXPRESSED IN: root, cultured cell; CONTAINS InterPro DOMAIN/s: Haem peroxidase (I
A_46_P155594	2.4029	3.59284	1.60294	Rep: Zinc finger A20 and AN1 domain-containing stress-associated protein 3 - Arabidopsis thaliana (Mouse-ear cress), partial (92%) [TC186682]
A_46_P136784	7.41706	8.53486	7.40944	Rep: Enolase - Brassica rapa subsp. chinensis (Pak-choi), complete [TC182902]	AT2G36530	Involved in light-dependent cold tolerance and encodes an enolase. Protein is tyrosine-phosphorylated and its phosphorylation state is modulated in response to ABA in Arabidopsis thaliana seeds.
A_46_P182574	1.15781	2.01769	1.40603	Rep: Gibberellin 2-beta-dioxygenase 2 - Arabidopsis thaliana (Mouse-ear cress), partial (25%) [TC187493]	AT1G30040	Encodes a gibberellin 2-oxidase that acts on C-19 gibberellins. AtGA2OX2 expression is responsive to cytokinin and KNOX activities.
A_46_P047036	2.08468	-1.51654	-1.69278	31ETGS12_UP_010_C01_05FEB2005_011 Brassica napus 31ETGS12 Brassica napus cDNA 5', mRNA sequence [EE424284]	AT5G56170	LORELEI-LIKE-GPI-ANCHORED PROTEIN 1 (LLG1); BEST Arabidopsis thaliana protein match is: lorelei (TAIR:AT4G26466.1); Has 1807 Blast hits to 1807 proteins in 277 species: Archae - 0; Bacteria - 0; Metazoa - 736; Fungi - 347; Plants - 385; Viruses - 0; Other
A_46_P109234	1.99022	2.43455	2.71951	BNAOV1GH_T3_024_G05_12JULY2007_035 BNAOV1GH Brassica napus cDNA 5', mRNA sequence [GR441766]	AT3G17070	Peroxidase family protein; FUNCTIONS IN: peroxidase activity, heme binding; INVOLVED IN: response to oxidative stress, oxidation reduction; LOCATED IN: endomembrane system; EXPRESSED IN: guard cell; CONTAINS InterPro DOMAIN/s: Haem peroxidase (InterPro:IP
A_46_P245409	2.00357	1.82472	1.87858		AT1G09690	Translation protein SH3-like family protein; FUNCTIONS IN: structural constituent of ribosome; INVOLVED IN: translation; LOCATED IN: ribosome, cytosolic large ribosomal subunit; EXPRESSED IN: juvenile leaf, pollen tube; CONTAINS InterPro DOMAIN/s: Transla
A_46_P272603	2.51456	1.84062	3.03983	Rep: A-agglutinin anchorage subunit precursor - Saccharomyces cerevisiae (Baker's yeast), partial (3%) [TC188701]
A_46_P338455	2.20381	1.8878	2.34645		AT1G76740	unknown protein; BEST Arabidopsis thaliana protein match is: unknown protein (TAIR:AT1G76840.1); Has 3683 Blast hits to 2942 proteins in 407 species: Archae - 9; Bacteria - 440; Metazoa - 1472; Fungi - 269; Plants - 192; Viruses - 8; Other Eukaryotes - 12
A_46_P013791	306.752	300.121	279.518	16ACDHDS_UP_007_D10_08APR2004_074 Brassica napus 16ACDHDS Brassica napus cDNA 5', mRNA sequence [CX280244]	AT3G13070	CBS domain-containing protein / transporter associated domain-containing protein; FUNCTIONS IN: molecular_function unknown; INVOLVED IN: biological_process unknown; LOCATED IN: chloroplast; EXPRESSED IN: 22 plant structures; EXPRESSED DURING: 13 growth st
A_46_P363930	1.81188	1.8441	2.44711	Rep: HSP like protein - Arabidopsis thaliana (Mouse-ear cress), partial (6%) [TC205437]	AT4G16660	heat shock protein 70 (Hsp 70) family protein; FUNCTIONS IN: ATP binding; LOCATED IN: plasma membrane, chloroplast; EXPRESSED IN: 24 plant structures; EXPRESSED DURING: 13 growth stages; CONTAINS InterPro DOMAIN/s: Heat shock protein 70, conserved site (I
A_46_P184431	2.38015	1.70272	1.32201	Rep: ZW9 protein - Arabidopsis thaliana (Mouse-ear cress), partial (91%) [TC188340]	AT1G58270	ZW9 mRNA, complete cds
A_46_P137034	395.652	732.482	523.551	Rep: Ascorbate peroxidase - Brassica oleracea (Wild cabbage), complete [TC167935]
A_46_P262603	2.27187	2.34044	2.24381	24RDBNH_UP_015_B09_22DEC2003_077 Brassica napus 24RDBNH Brassica napus cDNA 5', mRNA sequence [CN731053]
A_46_P188389	2.57793	2.57251	2.87292		AT3G53580	diaminopimelate epimerase family protein; FUNCTIONS IN: diaminopimelate epimerase activity; INVOLVED IN: lysine biosynthetic process via diaminopimelate; LOCATED IN: chloroplast; EXPRESSED IN: 24 plant structures; EXPRESSED DURING: 15 growth stages; CONTA
A_46_P290913	3.12922	2.74448	2.2436	Rep: Genomic DNA, chromosome 5, BAC clone:F15L12 - Arabidopsis thaliana (Mouse-ear cress), partial (17%) [TC211161]	AT5G60142	AP2/B3-like transcriptional factor family protein; FUNCTIONS IN: DNA binding; INVOLVED IN: regulation of transcription, DNA-dependent; LOCATED IN: cellular_component unknown; CONTAINS InterPro DOMAIN/s: Transcriptional factor B3 (InterPro:IPR003340); BEST
A_46_P110944	1.58943	10.8689	1.6381	24RDBNH_UP_153_A11_13DEC2006_095 Brassica napus 24RDBNH Brassica napus cDNA 5', mRNA sequence [ES920225]
A_46_P355490	6.8765	8.87083	8.45616	Rep: Transcription factor ICE1 - Arabidopsis thaliana (Mouse-ear cress), partial (41%) [TC201471]
A_46_P018941	5.29924	8.12639	11.4033	0096188 Brassica napus Bud library Brassica napus cDNA, mRNA sequence [EV152917]	AT3G16380	polyadenylate-binding protein, putative / PABP, putative, similar to polyadenylate-binding protein (poly(A)-binding protein) from {Arabidopsis thaliana} SP:P42731, (Cucumis sativus) GI:7528270, {Homo sapiens} SP:Q13310, {Arabidopsis thaliana} SP:Q05196; c
A_46_P158164	4.65487	3.34265	2.44534		AT4G26840	Encodes a small ubiquitin-like modifier (SUMO) polypeptide that becomes covalently attached to various intracellular protein targets, much like ubiquitination, leading to post-translational modification of those targets.
A_46_P152174	2.05948	2.23355	1.87041	Rep: Expressed protein - Arabidopsis thaliana (Mouse-ear cress), complete [TC165474]	AT4G30996	NKS1, a plant-specific gene, encodes a 19 kDa endomembrane-localized protein. It is part of SOS independent ion homeostasis regulation pathway.
A_46_P144209	4.84271	4.71863	4.00532		AT3G63410	Encodes a MPBQ/MSBQ methyltransferase located in the chloroplast inner envelope membrane. Mutant plants lack plastoquinone (PQ), suggesting that the APG1 protein is involved in the methylation step of PQ biosynthesis. The gene product is also involved in
A_46_P189379	1.88927	4.12828	4.21632
A_46_P343870	2.42434	1.99461	2.81252	Rep: Uncharacterized protein At3g52070.2 - Arabidopsis thaliana (Mouse-ear cress), partial (71%) [TC179932]	AT3G52072	Potential natural antisense gene, locus overlaps with AT3G52070
A_46_P051786	191.148	333.572	114.249	BNSCS5CT_UP_011_A03_20JAN2005_031 Brassica napus seed coat BNSCS5CT Brassica napus cDNA 5', mRNA sequence [EE471277]
A_46_P009136	2.11914	4.36059	3.84117	Brassica napus polygalacturonase inhibitor protein (PGIP2) mRNA, complete cds [AF529693]	AT5G06860	Encodes a polygalacturonase inhibiting protein involved in defense response. PGIPs inhibit the function of cell wall pectin degrading enzymes such as those produced by fungal pathogens. PGIP1 is induced by fungal infection.
A_46_P376565	2.17639	2.62744	2.33999
A_46_P200374	3.05979	2.76243	3.49769	Rep: Chromosome chr13 scaffold_48, whole genome shotgun sequence - Vitis vinifera (Grape), partial (44%) [TC207976]	AT2G40460	Major facilitator superfamily protein; FUNCTIONS IN: transporter activity; INVOLVED IN: oligopeptide transport, response to nematode; LOCATED IN: membrane; EXPRESSED IN: 22 plant structures; EXPRESSED DURING: 13 growth stages; CONTAINS InterPro DOMAIN/s:
A_46_P275428	59.0701	91.7875	54.6483	Rep: CHP-rich zinc finger protein-like - Oryza sativa subsp. japonica (Rice), partial (52%) [TC202536]	AT4G27320	Contains a universal stress protein domain. Protein is phosphorylated in response to Phytophthora infestans zoospores and xylanase.
A_46_P327370	11.8995	1.84162	2.7441	Rep: Probable phytol kinase 2, chloroplast precursor - Arabidopsis thaliana (Mouse-ear cress), partial (36%) [TC183819]	AT5G58560	FOLK is a farnesol kinase that can phosphorylate farnesol using an NTP donor. It can also phosphorylate geraniol, or geranylgeraniol, but it prefers farnesol in experiments performed using yeast membranes. folk loss-of-function mutants show ABA hypersensi
A_46_P317325	3.83931	1.26695	3.51846	Rep: Small nuclear riboprotein Sm-D1 - Arabidopsis thaliana (Mouse-ear cress), partial (83%) [TC212761]
A_46_P350820	1.53825	1.55793	2.64614	Rep: Chromosome chr10 scaffold_76, whole genome shotgun sequence - Vitis vinifera (Grape), partial (79%) [TC199090]	AT4G20380	LSD1 monitors a superoxide-dependent signal and negatively regulates a plant cell death pathway. contains zinc-finger motifs. LSD1 negatively regulates a basal defense pathway that can act upstream or independently of both NIM1/NPR1 function and SA accumu
A_46_P017426	2.42392	1.76341	1.27985	0122862 Brassica napus Root library Brassica napus cDNA, mRNA sequence [EV117550]	AT1G58270	ZW9 mRNA, complete cds
A_46_P263433	23.2458	25.7044	25.9423	Rep: Subtilisin proteinase-like - Arabidopsis thaliana (Mouse-ear cress), partial (44%) [TC204295]	AT4G21650	Subtilase family protein; FUNCTIONS IN: identical protein binding, serine-type endopeptidase activity; INVOLVED IN: proteolysis, negative regulation of catalytic activity; LOCATED IN: plant-type cell wall; EXPRESSED IN: 22 plant structures; EXPRESSED DURI
A_46_P140109	5.69824	6.63792	6.81627	Rep: Uncharacterized protein At1g47420, mitochondrial precursor - Arabidopsis thaliana (Mouse-ear cress), partial (70%) [TC186565]	AT1G47420	succinate dehydrogenase 5 (SDH5); FUNCTIONS IN: molecular_function unknown; INVOLVED IN: biological_process unknown; LOCATED IN: mitochondrion, nucleus; EXPRESSED IN: 26 plant structures; EXPRESSED DURING: 15 growth stages; BEST Arabidopsis thaliana prote
A_46_P089636	3.11812	5.62545	7.41359	26RDBNT_UP_055_B03_10NOV2005_029 Brassica napus 26RDBNT Brassica napus cDNA 5', mRNA sequence [EE514738]
A_46_P209594	2.85433	2.08994	1.86282	Brassica napus fibrillin mRNA, partial cds [AF084554]	AT4G04020	Fibrillin precursor protein. The fibrillin preprotein, but not the mature protein interacts with ABI2. Regulated by abscisic acid response regulators. Involved in abscisic acid-mediated photoprotection.
A_46_P301250	2.44964	2.63595	2.44555		AT3G19570	Encodes SCO3 (snowy cotyledon3), a member of a largely uncharacterized protein family unique to the plant kingdom. The sco3-1 mutation alters chloroplast morphology and development, reduces chlorophyll accumulation, impairs thylakoid formation and photosy
A_46_P349240	26.7916	27.6662	35.0974	Rep: Sequence orphan - Schizosaccharomyces pombe (Fission yeast), partial (4%) [TC198173]
A_46_P029626	2.15324	2.13059	2.08263	Rep: F9F8.12 protein - Arabidopsis thaliana (Mouse-ear cress), partial (36%) [TC169296]	AT5G05520	Outer membrane OMP85 family protein; FUNCTIONS IN: molecular_function unknown; INVOLVED IN: biological_process unknown; LOCATED IN: mitochondrion, plastid; EXPRESSED IN: 24 plant structures; EXPRESSED DURING: 14 growth stages; CONTAINS InterPro DOMAIN/s:
A_46_P000136	2.49799	2.36378	1.84872	24RDBNH_UP_019_G05_09JAN2004_035 Brassica napus 24RDBNH Brassica napus cDNA 5', mRNA sequence [CN731469]
A_46_P324910	1.87334	2.36446	2.13011	Rep: Acetylglutamate kinase-like protein - Arabidopsis thaliana (Mouse-ear cress), partial (53%) [TC181804]	AT3G57560	encodes a N-acetylglutamate kinase, involved in arginine biosynthesis
A_46_P321215	3.8988	3.5984	1.3191	Rep: Cytochrome P450 83A1 - Arabidopsis thaliana (Mouse-ear cress), partial (54%) [TC178586]	AT4G13770	Encodes a cytochrome p450 enzyme that catalyzes the initial conversion of aldoximes to thiohydroximates in the synthesis of glucosinolates not derived from tryptophan. Also has a role in auxin homeostasis.
A_46_P348210	2.87378	2.38356	2.14248	Rep: Chromosome chr4 scaffold_73, whole genome shotgun sequence - Vitis vinifera (Grape), partial (39%) [TC197610]	AT1G51510	This gene is predicted to encode a protein involved in the exon junction complex. Though there is a predicted RNA binding motif, in the Drosophila ortholog (33% identity), this motif mediates interactions with Mago and is not available for RNA binding. Th
A_46_P326860	2.22835	1.98653	2.0064	Rep: Uncharacterized protein At3g15640.2 - Arabidopsis thaliana (Mouse-ear cress), partial (91%) [TC183454]
A_46_P189019	2.61437	2.60732	2.62138	BNARO6GH_T3_014_B01_07DEC2006_013 Brassica napus BNARO6GH Brassica napus cDNA 5', mRNA sequence [ES909988]	AT4G29260	HAD superfamily, subfamily IIIB acid phosphatase ; FUNCTIONS IN: acid phosphatase activity; INVOLVED IN: biological_process unknown; LOCATED IN: plasma membrane, vacuole; EXPRESSED IN: 26 plant structures; EXPRESSED DURING: 15 growth stages; CONTAINS Inte
A_46_P222629	2.77934	2.74378	2.84778	Rep: Chromosome chr4 scaffold_6, whole genome shotgun sequence - Vitis vinifera (Grape), partial (93%) [TC176444]	AT5G11900	Translation initiation factor SUI1 family protein; FUNCTIONS IN: translation initiation factor activity; INVOLVED IN: translational initiation; LOCATED IN: cellular_component unknown; EXPRESSED IN: 23 plant structures; EXPRESSED DURING: 13 growth stages;
A_46_P179974	7.35158	5.05106	7.09151	Rep: RING-H2 finger protein ATL4K - Arabidopsis thaliana (Mouse-ear cress), partial (25%) [TC183085]	AT4G30400	RING/U-box superfamily protein; FUNCTIONS IN: zinc ion binding; INVOLVED IN: response to karrikin; EXPRESSED IN: 20 plant structures; EXPRESSED DURING: 9 growth stages; CONTAINS InterPro DOMAIN/s: Zinc finger, RING-type (InterPro:IPR001841), Zinc finger,
A_46_P171254	1.79448	2.04575	2.77832		AT1G54040	Epithiospecifier protein, interacts with WRKY53. Involved in pathogen resistance and leaf senescence.
A_46_P154199	2.71494	2.04942	1.4338	Rep: Berberine bridge enzyme - Arabidopsis thaliana (Mouse-ear cress), partial (97%) [TC171005]	AT5G44400	FAD-binding Berberine family protein; FUNCTIONS IN: electron carrier activity, oxidoreductase activity, FAD binding, catalytic activity; LOCATED IN: cell wall; EXPRESSED IN: 18 plant structures; EXPRESSED DURING: 10 growth stages; CONTAINS InterPro DOMAIN
A_46_P280978	2.00611	1.54289	1.15133	Rep: Chromosome chr15 scaffold_40, whole genome shotgun sequence - Vitis vinifera (Grape), partial (41%) [TC170147]	AT4G38100	unknown protein; LOCATED IN: chloroplast thylakoid membrane; EXPRESSED IN: 23 plant structures; EXPRESSED DURING: 13 growth stages; BEST Arabidopsis thaliana protein match is: unknown protein (TAIR:AT4G01150.1); Has 30201 Blast hits to 17322 proteins in 7
A_46_P351655	1.9326	2.82819	3.37341	Rep: Cytochrome P450 71B2 - Arabidopsis thaliana (Mouse-ear cress), partial (66%) [TC199550]	AT1G13080	cytochrome P450 monooxygenase
A_46_P352735	1.28023	2.49677	2.12694	Rep: Rab-type small GTP-binding protein-like - Arabidopsis thaliana (Mouse-ear cress), partial (30%) [TC200075]	AT5G59840	Ras-related small GTP-binding family protein; FUNCTIONS IN: GTP binding; INVOLVED IN: protein transport, small GTPase mediated signal transduction; LOCATED IN: plasma membrane; EXPRESSED IN: 23 plant structures; EXPRESSED DURING: 15 growth stages; CONTAIN
A_46_P320090	1.41675	2.03382	2.37482	Rep: Delta-9 desaturase-like 1 protein - Arabidopsis thaliana (Mouse-ear cress), partial (94%) [TC177482]	AT1G06120	Fatty acid desaturase family protein; FUNCTIONS IN: oxidoreductase activity, oxidoreductase activity, acting on paired donors, with oxidation of a pair of donors resulting in the reduction of molecular oxygen to two molecules of water; INVOLVED IN: oxidat
A_46_P003146	15.111	16.413	13.6574	28-E023408w-021-020-H08-frev ADIS-MPIZ 021 Brassica napus cDNA clone MPIZp1022H0820Q, mRNA sequence [CX193705]	AT5G18770	F-box/FBD-like domains containing protein; FUNCTIONS IN: molecular_function unknown; INVOLVED IN: biological_process unknown; LOCATED IN: chloroplast; EXPRESSED IN: 19 plant structures; EXPRESSED DURING: 10 growth stages; CONTAINS InterPro DOMAIN/s: FBD (
A_46_P213204	2.61943	2.64338	2.62578	Rep: Protein yippee-like At5g53940 - Arabidopsis thaliana (Mouse-ear cress), partial (92%) [TC168518]	AT5G53940	Yippee family putative zinc-binding protein; CONTAINS InterPro DOMAIN/s: Yippee-like protein (InterPro:IPR004910); BEST Arabidopsis thaliana protein match is: Yippee family putative zinc-binding protein (TAIR:AT2G40110.1); Has 1807 Blast hits to 1807 prot
A_46_P351310	1.592	2.14324	1.84012	Rep: Translin-like protein - Arabidopsis thaliana (Mouse-ear cress), partial (93%) [TC199352]
A_46_P364290	1.78352	2.23376	2.26153	Rep: RING-H2 finger protein ATL2A - Arabidopsis thaliana (Mouse-ear cress), partial (19%) [TC205621]	AT2G17450	Encodes a putative RING-H2 finger protein RHA3a.
A_46_P274093	2.18211	1.97868	2.41166	Rep: Predicted protein - Monosiga brevicollis MX1, partial (13%) [TC193753]
A_46_P140729	827.168	864.232	880.403	Rep: 10 kDa chaperonin - Brassica napus (Rape), complete [TC181118]	AT1G14980	Encodes mitochondrial-localized chaperonin 10 that complements the E.coli groES mutant. Its mRNA is upregulated in response to heat shock treatment and is expressed uniformly in various organs.
A_46_P192739	2.99912	3.11898	3.17189
A_46_P066746	1.55063	1.41758	2.14366	0144056 Brassica napus Etiolated seedlings (Uni-ZAP) Brassica napus cDNA, mRNA sequence [EV167246]	AT4G18480	Encodes the CHLI subunit of magnesium chelatase which is required for chlorophyll biosynthesis. All four cysteine residues of the protein form two disulfide bonds (Cys102-Cys193 and Cys354-Cys396) under oxidized conditions but are fully reduced by reducti
A_46_P018806	4.4493	1.93968	1.62723	BNARO2GH_T3_016_C11_15DEC2006_091 Brassica napus BNARO2GH Brassica napus cDNA 5', mRNA sequence [ES912011]
A_46_P222224	4.55337	8.759	9.58556
A_46_P164604	2.24009	2.35604	2.24822	Rep: At1g32359/F27G20.10 - Arabidopsis thaliana (Mouse-ear cress), partial (6%) [TC176463]
A_46_P331965	3.19089	4.29541	4.56676
A_46_P265343	7.83148	7.12671	6.11844		AT1G27330	Ribosome associated membrane protein RAMP4; CONTAINS InterPro DOMAIN/s: Ribosome associated membrane RAMP4 (InterPro:IPR010580); BEST Arabidopsis thaliana protein match is: Ribosome associated membrane protein RAMP4 (TAIR:AT1G27350.1); Has 348 Blast hits
A_46_P181224	2.33835	2.02106	2.21411	Rep: Uncharacterized protein At4g31420.2 - Arabidopsis thaliana (Mouse-ear cress), partial (49%) [TC176891]	AT4G31420	Zinc finger protein 622; FUNCTIONS IN: sequence-specific DNA binding transcription factor activity; INVOLVED IN: regulation of transcription; LOCATED IN: intracellular; EXPRESSED IN: 25 plant structures; EXPRESSED DURING: 15 growth stages; CONTAINS InterP
A_46_P172444	1.94136	2.04505	1.53437	Rep: F6A14.2 protein - Arabidopsis thaliana (Mouse-ear cress), partial (98%) [TC165927]	AT1G18880	Encodes a low-af&#64257;nity plasma membrane nitrate transporter expressed in the companion cells of root phloem.
A_46_P183844	49.9874	61.66	49.1101
A_46_P100334	2.4617	2.3438	2.06755	BNARO4GH_T3_006_B12_24NOV2006_094 Brassica napus BNARO4GH Brassica napus cDNA 5', mRNA sequence [ES902856]	AT5G63640	ENTH/VHS/GAT family protein; FUNCTIONS IN: protein transporter activity; INVOLVED IN: intracellular protein transport, intra-Golgi vesicle-mediated transport; LOCATED IN: Golgi stack, plasma membrane; EXPRESSED IN: 23 plant structures; EXPRESSED DURING: 1
A_46_P198734	1.42898	1.80219	2.03416	Rep: Receptor protein kinase-like protein At4g34220 precursor - Arabidopsis thaliana (Mouse-ear cress), partial (29%) [TC183575]	AT4G34220	Leucine-rich repeat protein kinase family protein; FUNCTIONS IN: protein serine/threonine kinase activity, protein kinase activity, ATP binding; INVOLVED IN: transmembrane receptor protein tyrosine kinase signaling pathway, protein amino acid phosphorylat
A_46_P129089	1.86065	1.99572	2.07414
A_46_P002736	1.91141	2.11641	1.91068	0200006 Brassica napus Stem library Brassica napus cDNA, mRNA sequence [EV129821]
A_46_P151524	2.69189	1.35022	2.21082	AAF02876.1 - Arabidopsis thaliana (Mouse-ear cress), partial (91%) [TC183180]	AT3G16570	Encodes RALF23, a member of a diversely expressed predicted peptide family showing sequence similarity to tobacco Rapid Alkalinization Factor (RALF), and is believed to play an essential role in the physiology of Arabidopsis. Consists of a single exon an
A_46_P124999	3.372	3.89844	3.18355	0201481 Brassica napus Undamaged cotyledons Brassica napus cDNA, mRNA sequence [EV187274]	AT2G01755	unknown protein; FUNCTIONS IN: molecular_function unknown; INVOLVED IN: biological_process unknown; LOCATED IN: chloroplast; Has 120 Blast hits to 120 proteins in 52 species: Archae - 0; Bacteria - 80; Metazoa - 0; Fungi - 0; Plants - 24; Viruses - 0; Oth
A_46_P032676	2.56955	2.81597	2.53775	BNARO1GH_T3_013_C03_22NOV2006_027 Brassica napus BNARO1GH Brassica napus cDNA 5', mRNA sequence [ES900671]	AT4G02640	Encodes a basic leucine zipper (bZIP) transcription factor AtbZIP10. AtbZIP10 shuttles between the nucleus and the cytoplasm. It binds consensus G- and C-box DNA sequences. AtbZIP10 acts antagonistically with LSD1 in both pathogen-induced hypersensitiv
A_46_P068411	1.94048	2.37032	2.62474	BNSCS3CT_UP_115_F06_06MAY2007_038 Brassica napus BNSCS3CT Brassica napus cDNA 5', mRNA sequence [EV045729]	AT1G04000	unknown protein; BEST Arabidopsis thaliana protein match is: unknown protein (TAIR:AT5G44060.1); Has 62 Blast hits to 62 proteins in 10 species: Archae - 0; Bacteria - 0; Metazoa - 0; Fungi - 0; Plants - 62; Viruses - 0; Other Eukaryotes - 0 (source: NCBI
A_46_P145069	2.379	1.75006	2.84284	Rep: Heat shock transcription factor-like protein - Arabidopsis thaliana (Mouse-ear cress), partial (9%) [TC169435]	AT3G62640	Protein of unknown function (DUF3511); CONTAINS InterPro DOMAIN/s: Protein of unknown function DUF3511 (InterPro:IPR021899); BEST Arabidopsis thaliana protein match is: Protein of unknown function (DUF3511) (TAIR:AT2G47480.1); Has 218 Blast hits to 218 pr
A_46_P050376	2.79835	1.4777	1.38364	0205198 Brassica napus Very early anther Brassica napus cDNA, mRNA sequence [EV139272]	AT4G20420	Tapetum specific protein TAP35/TAP44; FUNCTIONS IN: molecular_function unknown; INVOLVED IN: biological_process unknown; LOCATED IN: endomembrane system; EXPRESSED IN: 9 plant structures; EXPRESSED DURING: 4 anthesis, F mature embryo stage, petal differen
A_46_P321995	1.74432	2.13519	1.89871	Rep: Agmatine deiminase - Arabidopsis thaliana (Mouse-ear cress), partial (98%) [TC179266]	AT5G08170	EMBRYO DEFECTIVE 1873 (EMB1873); CONTAINS InterPro DOMAIN/s: Agmatine deiminase (InterPro:IPR017754), Peptidyl-arginine deiminase, Porphyromonas-type (InterPro:IPR007466); Has 2547 Blast hits to 2545 proteins in 784 species: Archae - 10; Bacteria - 1723;
A_46_P358071	2.75247	3.04524	2.69668	0118915 Brassica napus Root library Brassica napus cDNA, mRNA sequence [EV113603]
A_46_P279478	89.5893	56.5662	78.2548	Rep: 60S ribosomal protein L28-2 - Arabidopsis thaliana (Mouse-ear cress), complete [TC164883]
A_46_P004207	2.16854	3.10738	2.77532	69JKME5D_T3_010_E04_27MAR2005_024 69JKME5D Brassica napus cDNA 5', mRNA sequence [ES266997]	AT5G18650	CHY-type/CTCHY-type/RING-type Zinc finger protein; FUNCTIONS IN: zinc ion binding; EXPRESSED IN: 24 plant structures; EXPRESSED DURING: 15 growth stages; CONTAINS InterPro DOMAIN/s: Zinc finger, CTCHY-type (InterPro:IPR017921), Zinc finger, CHY-type (Inte
A_46_P189704	140.905	129.949	114.559
A_46_P336585	2.61667	3.21806	3.36462	Rep: AT4g31450/F3L17_20 - Arabidopsis thaliana (Mouse-ear cress), partial (82%) [TC190543]	AT4G31450	RING/U-box superfamily protein; FUNCTIONS IN: zinc ion binding; EXPRESSED IN: 22 plant structures; EXPRESSED DURING: 15 growth stages; CONTAINS InterPro DOMAIN/s: Zinc finger, RING-type (InterPro:IPR001841), Zinc finger, C3HC4 RING-type (InterPro:IPR01895
A_46_P171794	1.31861	2.51083	2.04734	Rep: Polyubiquitin - Fragaria ananassa (Strawberry), partial (71%) [TC175085]
A_46_P280403	18.7705	23.175	29.4794
A_46_P005736	2.27629	2.45232	1.7104	25RDBNM_UP_018_D05_16JAN2004_041 Brassica napus 25RDBNM Brassica napus cDNA 5', mRNA sequence [CN733921]	AT3G63030	Protein containing methyl-CpG-binding domain.Has sequence similarity to human MBD proteins.
A_46_P309880	1.2723	1.84145	2.1028	Rep: RING finger protein 207 - Homo sapiens (Human), partial (3%) [TC166570]	AT4G31270	sequence-specific DNA binding transcription factors; BEST Arabidopsis thaliana protein match is: Homeodomain-like superfamily protein (TAIR:AT2G33550.1); Has 462 Blast hits to 461 proteins in 32 species: Archae - 0; Bacteria - 0; Metazoa - 14; Fungi - 2;
A_46_P228119	2.15629	1.83897	1.66911	Rep: Calcium-transporting ATPase 9, plasma membrane-type (EC 3.6.3.8) (Ca(2+)-ATPase isoform 9) - Arabidopsis thaliana (Mouse-ear cress), partial (9%) [TC208735]	AT3G21180	one of the type IIB calcium pump isoforms. encodes an autoinhibited Ca(2+)-ATPase that contains an N-terminal calmodulin binding autoinhibitory domain.
A_46_P148989	38.8848	19.835	34.6356	Rep: F12A21.26 - Arabidopsis thaliana (Mouse-ear cress), partial (74%) [TC183143]	AT1G67645	pseudogene, hypothetical protein
A_46_P233304	2.83023	1.87379	2.32267
A_46_P163349	7.67036	7.16754	5.66023	Rep: Metallothionein-like protein type 2, MT2-18 - Brassica juncea (Leaf mustard) (Indian mustard), complete [TC199943]	AT3G09390	metallothionein, binds to and detoxifies excess copper and other metals, limiting oxidative damage
A_46_P216504	18.5421	20.1106	20.2954	Rep: 50S ribosomal protein L10, chloroplast precursor - Arabidopsis thaliana (Mouse-ear cress), complete [TC177328]	AT5G13510	Ribosomal protein L10 family protein; FUNCTIONS IN: structural constituent of ribosome; INVOLVED IN: translation, ribosome biogenesis; LOCATED IN: cytosolic ribosome, ribosome, chloroplast, chloroplast stroma; EXPRESSED IN: 23 plant structures; EXPRESSED
A_46_P224609	6.20655	4.78845	5.3077	Rep: At1g28320/F3H9_2 - Arabidopsis thaliana (Mouse-ear cress), partial (23%) [TC190615]	AT1G28320	Mutants in this gene are defective in the processing of pre-glyoxysomal malate dehydrogenase (pre-gMDH) to gMDH.
A_46_P246769	2.43509	1.93941	1.95514
A_46_P008071	3.08212	3.19494	3.35072	EL202 Brassica embryo library (EL) Brassica napus cDNA clone EL202 complete, mRNA sequence [CN827085]	AT1G19300	The PARVUS/GLZ1 gene encodes a putative family 8 glycosyl transferase that contributes to xylan biosynthesis. Its gene expression shows good co-variance with the IRX3 gene involved in secondary cell wall synthesis. PARVUS/GLZ1 is predicted to have galactu
A_46_P341195	207.717	332.623	241.701	Rep: At2g14841/At2g14841 - Arabidopsis thaliana (Mouse-ear cress), partial (24%) [TC207957]
A_46_P001956	2.31401	2.56784	2.63555	BNYS4DCT_UP_034_H08_22MAR2005_050 Brassica napus seeds BNYS4DCT Brassica napus cDNA 5', mRNA sequence [EE478083]	AT5G08565	Transcription initiation Spt4-like protein; FUNCTIONS IN: positive transcription elongation factor activity, zinc ion binding; INVOLVED IN: positive regulation of transcription; LOCATED IN: nucleus; EXPRESSED IN: 23 plant structures; EXPRESSED DURING: 14
A_46_P268258	4.53169	4.26495	4.5422	0192354 Brassica napus Apical meristem Brassica napus cDNA, mRNA sequence [EV094353]	AT1G04690	potassium channel beta subunit 1 (KAB1); FUNCTIONS IN: oxidoreductase activity, potassium channel activity; INVOLVED IN: oxidation reduction, potassium ion transport, transmembrane transport; LOCATED IN: plasma membrane, membrane; EXPRESSED IN: 24 plant s
A_46_P079081	102.863	71.0369	54.471	56ACAC48_UP_030_G05_20DEC2004_035 Brassica napus Brassica napus cDNA 5', mRNA sequence [EE414457]	AT1G71940	SNARE associated Golgi protein family; FUNCTIONS IN: molecular_function unknown; INVOLVED IN: biological_process unknown; LOCATED IN: cellular_component unknown; EXPRESSED IN: 22 plant structures; EXPRESSED DURING: 13 growth stages; CONTAINS InterPro DOMA
A_46_P147394	3.03075	3.1707	3.55663	BNSCS4CT_UP_217_D06_23MAY2007_042 Brassica napus BNSCS4CT Brassica napus cDNA 5', mRNA sequence [EV075122]
A_46_P061536	2.55608	-1.42039	-2.17672	BNYS2DCT_UP_020_B12_01MAR2005_094 Brassica napus seeds BNYS2DCT Brassica napus cDNA 5', mRNA sequence [EE474956]	AT1G03170	A member of the FAF family proteins encoded by the FANTASTIC FOUR (FAF) genes: AT4G02810 (FAF1), AT1G03170 (FAF2), AT5G19260 (FAF3) and AT3G06020 (FAF4). FAFs have the potential to regulate shoot meristem size in Arabidopsis thaliana. FAFs can repress
A_46_P359820	1.84894	1.74529	2.92154	Rep: Peroxidase C1C precursor - Armoracia rusticana (Horseradish) (Armoracia laphatifolia), partial (23%) [TC203570]	AT3G49110	Class III peroxidase Perx33. Expressed in roots. Located in the cell wall. Involved in cell elongation. Expression activated by light. May play a role in generating H2O2 during defense response.
A_46_P044496	6.45345	5.86196	5.21623	BNDH4DCT_UP_034_B05_17DEC2004_045 Brassica napus seeds BNDH4DCT Brassica napus cDNA 5', mRNA sequence [DY007665]
A_46_P240959	3.22037	1.99516	1.9232	Rep: Cellulose synthase like protein - Arabidopsis thaliana (Mouse-ear cress), partial (59%) [TC212881]	AT4G16590	encodes a gene similar to cellulose synthase
A_46_P066331	7.81036	17.9719	13.2352	BNSCS2CT_UP_028_H05_07JAN2005_033 Brassica napus seed coat BNSCS2CT Brassica napus cDNA 5', mRNA sequence [EE464508]	AT2G22870	embryo defective 2001 (EMB2001); FUNCTIONS IN: GTP binding; INVOLVED IN: embryo development ending in seed dormancy; LOCATED IN: intracellular; EXPRESSED IN: 21 plant structures; EXPRESSED DURING: 13 growth stages; CONTAINS InterPro DOMAIN/s: GTP-binding
A_46_P327175	2.30432	3.30563	3.07628	Rep: At1g10380/F14N23_32 - Arabidopsis thaliana (Mouse-ear cress), partial (61%) [TC183679]	AT1G10380	Putative membrane lipoprotein; FUNCTIONS IN: molecular_function unknown; INVOLVED IN: biological_process unknown; LOCATED IN: endomembrane system; EXPRESSED IN: 19 plant structures; EXPRESSED DURING: 10 growth stages; BEST Arabidopsis thaliana protein mat
A_46_P369310	1.99519	2.35145	1.86734		AT2G33060	receptor like protein 27 (RLP27); FUNCTIONS IN: kinase activity; INVOLVED IN: signal transduction, defense response; LOCATED IN: endomembrane system; CONTAINS InterPro DOMAIN/s: Leucine-rich repeat, typical subtype (InterPro:IPR003591), Leucine-rich repea
A_46_P026791	1.53217	1.57223	2.24979	BNARO4GH_T3_017_F12_24NOV2006_086 Brassica napus BNARO4GH Brassica napus cDNA 5', mRNA sequence [ES904302]	AT2G40330	Encodes a member of the PYR (pyrabactin resistance )/PYL(PYR1-like)/RCAR (regulatory components of ABA receptor) family proteins with 14 members. PYR/PYL/RCAR family proteins function as abscisic acid sensors. Mediate ABA-dependent regulation of protein
A_46_P198219	2.10034	1.84403	1.72217	Brassica napus omega-6 desaturase mRNA, complete cds; proplastid [AY642535]	AT4G30950	Chloroplastic enzyme responsible for the synthesis of 16:2 and 18:2 fatty acids from galactolipids, sulpholipids and phosphatidylglycerol. Uses ferredoxin as electron donor. Gene mutation resulted in reduced level of unsaturated fatty acids leading to sus
A_46_P207479	2.01205	1.47186	1.35904
A_46_P044741	24.6813	25.228	24.6828	0090425 Brassica napus Cold acclimation - dark Brassica napus cDNA, mRNA sequence [EV192942]
A_46_P257054	168.813	283.935	283.664	Rep: Tubulin beta-1 chain - Arabidopsis thaliana (Mouse-ear cress), partial (41%) [TC167248]	AT1G75780	beta tubulin gene downregulated by phytochrome A (phyA)-mediated far-red light high-irradiance and the phytochrome B (phyB)-mediated red light high-irradiance responses
[truncated: 2,154 more rows]
